# Supplementary material for: Metabolomics: population epidemiology and concordance in Australian children aged 11–12 years and their parents
Source: PubMed Central journal article supplement — BMJ Open. 2019 Jul 4;9(Suppl 3):106–17. doi: 10.1136/bmjopen-2017-020900 (PMC6624050; doi:10.1136/bmjopen-2017-020900), 2019-07-04
Supplement: bmjopen-2017-020900.draft_revisions.pdf [file bmjopen-2017-020900.draft_revisions.pdf]

# BMJ Open

BMJ Open is committed to open peer review. As part of this commitment we make the peer review history of every article we publish publicly available.

When an article is published we post the peer reviewers' comments and the authors' responses online. We also post the versions of the paper that were used during peer review. These are the versions that the peer review comments apply to.

The versions of the paper that follow are the versions that were submitted during the peer review process. They are not the versions of record or the final published versions. They should not be cited or distributed as the published version of this manuscript.

BMJ Open is an open access journal and the full, final, typeset and author-corrected version of record of the manuscript is available on our site with no access controls, subscription charges or pay-per-view fees (<http://bmjopen.bmj.com>).

If you have any questions on BMJ Open's open peer review process please email [info.bmjopen@bmj.com](mailto:info.bmjopen@bmj.com)

# BMJ Open

## Metabolomics: Population epidemiology and concordance in 11-12 year old Australians and their parents

|                                 |                                                                                                                                                                                                                                                                                                                                                                                                                                                                                                                                                                                                                                                                                                                                                                                                                                                                                                                           |
|---------------------------------|---------------------------------------------------------------------------------------------------------------------------------------------------------------------------------------------------------------------------------------------------------------------------------------------------------------------------------------------------------------------------------------------------------------------------------------------------------------------------------------------------------------------------------------------------------------------------------------------------------------------------------------------------------------------------------------------------------------------------------------------------------------------------------------------------------------------------------------------------------------------------------------------------------------------------|
| Journal:                        | <i>BMJ Open</i>                                                                                                                                                                                                                                                                                                                                                                                                                                                                                                                                                                                                                                                                                                                                                                                                                                                                                                           |
| Manuscript ID                   | bmjopen-2017-020900                                                                                                                                                                                                                                                                                                                                                                                                                                                                                                                                                                                                                                                                                                                                                                                                                                                                                                       |
| Article Type:                   | Research                                                                                                                                                                                                                                                                                                                                                                                                                                                                                                                                                                                                                                                                                                                                                                                                                                                                                                                  |
| Date Submitted by the Author:   | 30-Nov-2017                                                                                                                                                                                                                                                                                                                                                                                                                                                                                                                                                                                                                                                                                                                                                                                                                                                                                                               |
| Complete List of Authors:       | Ellul, Susan; Murdoch Children's Research Institute<br>Wake, Melissa; Murdoch Children's Research Institute; University of Auckland, Department of Paediatrics & The Liggins Institute<br>Clifford, Susan; Murdoch Children's Research Institute; The University of Melbourne<br>Lange, Katherine; Murdoch Children's Research Institute<br>Wurtz, Peter; University of Helsinki, Research Programs Unit, Diabetes and Obesity; Nightingale Health Ltd.<br>Juonala, Markus; University of Turku, Department of Medicine<br>Dwyer, Terry; Murdoch Children's Research Institute; The University of Melbourne<br>Carlin, John; Murdoch Children's Research Institute,<br>Burgner, David; Murdoch Children's Research Institute; Monash University, Department of Paediatrics<br>Saffery, Richard; Murdoch Children's Research Institute, Cancer and Disease Epigenetics; University of Melbourne, Department of Paediatrics |
| <b>Primary Subject Heading</b>: | Epidemiology                                                                                                                                                                                                                                                                                                                                                                                                                                                                                                                                                                                                                                                                                                                                                                                                                                                                                                              |
| Secondary Subject Heading:      | Paediatrics, Public health, Diabetes and endocrinology                                                                                                                                                                                                                                                                                                                                                                                                                                                                                                                                                                                                                                                                                                                                                                                                                                                                    |
| Keywords:                       | Metabolomics, Lipids, Reference values, Children, Inheritance patterns, Epidemiologic studies                                                                                                                                                                                                                                                                                                                                                                                                                                                                                                                                                                                                                                                                                                                                                                                                                             |
|                                 |                                                                                                                                                                                                                                                                                                                                                                                                                                                                                                                                                                                                                                                                                                                                                                                                                                                                                                                           |

SCHOLARONE™  
Manuscripts



1 **Metabolomics: Population epidemiology and concordance in 11-12 year old Australians and their**  
2 **parents**

3  
4 **Authors:** Susan Ellul<sup>1</sup>, Melissa Wake<sup>1-3</sup>, Susan A. Clifford<sup>1,2</sup>, Katherine Lange<sup>1</sup>, Peter  
5 Würtz<sup>4,5</sup>, Markus Juonala<sup>6</sup>, Terence Dwyer<sup>1,2,7,8</sup>, John Carlin<sup>1,2</sup>, David Burgner<sup>1,2,9</sup> and  
6 Richard Saffery<sup>1,2</sup>.

7  
8 **Affiliations:** <sup>1</sup>Murdoch Children's Research Institute, Parkville, Victoria, Australia; <sup>2</sup>The  
9 University of Melbourne, Parkville, Victoria, Australia; <sup>3</sup>Dept of Paediatrics and the Liggins  
10 Institute, University of Auckland, Grafton, Auckland, New Zealand; <sup>4</sup>Research Programs  
11 Unit, Diabetes and Obesity, University of Helsinki, Helsinki, Finland; <sup>5</sup>Nightingale Health  
12 Ltd., Helsinki, Finland; <sup>6</sup>Department of Medicine, University of Turku, Finland, 2 Division of  
13 Medicine, Turku University Hospital, Turku, Finland; <sup>7</sup>The George Institute for Global  
14 Health, Nuffield Department of Obstetrics and Gynaecology, University of Oxford, Oxford,  
15 United Kingdom. <sup>8</sup>Institute for Medical Research, University of Tasmania, Hobart, Tasmania,  
16 Australia; <sup>9</sup>Department of Paediatrics, Monash University, Clayton, Victoria, Australia.

17  
18 **Correspondence to:** Professor Melissa Wake,  
19 Murdoch Children's Research Institute  
20 The Royal Children's Hospital  
21 50 Flemington Road, Parkville 3052, VIC Australia.  
22 Telephone: +61 3 9345 5761  
23 Email: melissa.wake@mcri.edu.au

24  
25 **Keywords:** Metabolomics; lipids; inflammation; reference values; parents; children;  
26 inheritance patterns; correlation studies; epidemiologic studies; cross-sectional studies.

27  
28 **Word count: 4181**

29  
30 **Abbreviations:** ApoA-1: Apolipoprotein A-1; Apo B: Apolipoprotein B; BCAA: Branched  
31 chain amino acid; CDC: Centers for Disease Prevention and Control; CVD: Cardiovascular  
32 disease; CPS1: Carbamoyl-phosphate synthase 1; DHA: Docosahexaenoic acid; DOB: Date  
33 of birth; EDTA: Ethylenediaminetetraacetic acid; GlycA: Glycoprotein acetyls; HbA1c:  
34 Haemoglobin A1c; HDL: High-density lipoprotein; HOMA: Homeostatic model assessment;  
35 IDL: Intermediate density lipoprotein; LA: Linoleic acid; LDL: Low-density lipoprotein;  
36 LiH: Lithium Heparin; LSAC: Longitudinal Study of Australian Children; MUFA:

1 Monounsaturated fatty acid; NMR: Nuclear magnetic resonance; PCOS: Polycystic Ovary  
2 Syndrome; PUFA: Polyunsaturated fatty acid; SFA: Saturated fatty acids; SST: serum  
3 separating tubes; T2D: Type 2 diabetes; T2DM: Type 2 diabetes mellitus; VLDL: Very low  
4 density lipoprotein; XL: Very large; XXL: Chylomicrons and extremely large; XS: Very  
5 small.

## 6 7 **ABSTRACT**

8  
9 **Objectives:** Nuclear Magnetic Resonance (NMR) metabolomics is high throughput and cost  
10 effective, with the potential to improving the understanding of disease and risk. We examine  
11 the circulating metabolic profile by quantitative NMR metabolomics of a sample of  
12 Australian 11-12 year old children and their parents, describe differences by age and sex, and  
13 explore correlation of metabolites in parent-child dyads.

14 **Design:** The population-based cross-sectional Child Health CheckPoint study nested within  
15 the Longitudinal Study of Australian Children.

16 **Setting:** Blood samples collected from CheckPoint participants at assessment centres in six  
17 Australian capital cities and eight selected regional centres between February 2015-March  
18 2016.

19 **Participants:** 1180 children and 1325 parents provided a blood sample and had  
20 metabolomics data available. This included 1133 parent-child dyads (518 mother-daughter,  
21 469 mother-son, 68 father-daughter, and 78 father-son).

22 **Outcome measures:** 228 metabolic measures were obtained for each participant. We  
23 focused on 70 biomarkers that captured variation in amino acid species, lipoprotein subclass  
24 measures, lipid measures, fatty acids, measures related to fatty acid saturation, and composite  
25 markers of inflammation and energy homeostasis.

26 **Results:** We identified sex-specific metabolic profiles in children and adults and differences  
27 in the level of specific metabolites between childhood and adulthood. In general, metabolite  
28 concentrations were higher in adults than children and sex differences were larger in adults  
29 than in children. Positive correlations within parent-child dyads were observed for the  
30 majority of metabolites. Correlations ranged from 0.03 (95% CI -0.05 to 0.12) for  
31 acetoacetate in mother-daughter dyads, to 0.39 (95% CI 0.31 to 0.47) for isoleucine in  
32 mother-son comparisons.

33 **Conclusions:** We report the serum metabolite profiles from mid-childhood and adulthood in  
34 a population-based sample, together with parent-child concordance. Distinct age- and sex-  
35 specific profiles were observed. These data will be informative for investigation of the

1 childhood origins of adult non-communicable diseases and for comparative studies in other  
2 populations.

3 **Strengths and limitations of this study:**

- 4 • In a large population-based cohort, venous blood was collected for children and their  
5 attending parent on the same day using the same methods
- 6 • Rapidly processed, high quality serum samples with standardised metabolomic data  
7 generated as a single batch
- 8 • Cross-sectional design does not enable longitudinal analysis of specific metabolite  
9 species over short term or longer periods of time
- 10 • Assessment of paternal influences on offspring metabolite measures is limited by a  
11 relatively small sample size compared to mother-child pairs, reducing the precision of  
12 estimates
- 13 • Factors known to influence metabolomic profile (such as body mass index) were not  
14 considered

## 1 INTRODUCTION

2  
3 Metabolomics involves the quantitative analysis of a large number of metabolites and lipids  
4 involved in a diverse range of biochemical pathways.<sup>1</sup> Genetic/gene expression and  
5 environmental exposures are associated with specific metabolic changes across many tissues  
6 and body fluids.<sup>2 3</sup> As such, metabolomics is recognised as a powerful top-down approach to  
7 understand genetic and environmental influences on health and disease. Metabolomic  
8 profiling also has considerable potential to identify clinically relevant biomarkers for risk  
9 stratification and disease monitoring.

10 Recent advances in nuclear magnetic resonance (NMR) spectroscopy and mass spectrometry  
11 have enabled the simultaneous quantitative measurement of hundreds of metabolites. These  
12 approaches are sufficiently cost effective and high throughput to be applicable to large cohort  
13 studies. For example, NMR metabolomics of serum from the Cardiovascular Risk in Young  
14 Finns Study identified many biomarkers from multiple metabolic pathways reflective of fatty  
15 liver disease.<sup>4</sup> These were also predictive of risk 10 years prior to diagnosis, indicating that  
16 metabolic disruptions precede overt phenotype. Similar population and disease-specific  
17 studies have identified metabolomic profiles associated with a range of exposures and health  
18 outcomes with potential to reveal clinically important biomarkers and information on disease  
19 mechanisms.<sup>5</sup> In addition, specific serum metabolites can also be considered ‘intermediate  
20 phenotypes’ linking genetic risk with disease outcomes.<sup>6 7</sup>

21 Previous research indicates that some blood metabolites change with age, particularly from  
22 mid to late adulthood.<sup>8 9</sup> However, in adults sex appears to be a major driver of variation in  
23 metabolite profile, potentially interacting with age. For example, the effects of sex appeared  
24 to be greater in younger (age 25-35) than older Japanese adults.<sup>10</sup> A study of 26,000 Northern  
25 European adults identified many sex-specific metabolic species at the population level.<sup>9</sup> In  
26 men, several lipid measures begin to rise at early middle age whereas a similar increase is  
27 only observed in females post menopause. This pattern is consistent for all cholesterol  
28 measures – very low density lipoprotein (VLDL), intermediate density lipoprotein (IDL) and  
29 low density lipoprotein (LDL) subclass particle concentrations - as well as for triglycerides.<sup>9</sup>  
30 Physiological states such as pregnancy also have consistent and measurable influence on  
31 serum metabolome.<sup>11</sup> However, it remains unclear how the serum metabolome responds to  
32 age, sex and hormonal-specific factors in childhood.

33 Moreover, factors regulating the metabolic trajectory from early life to adulthood, the role of  
34 metabolomic profile in health at the population level and the extent to which blood  
35 metabolomic profiles are concordant for parents and children have not been fully explored.  
36 One small study has reported correlations between parents (n=179) and their offspring

(n=255) for a range of cardiometabolic risk factors including standard lipid profile measured using conventional methods; this proved stronger for total cholesterol and LDL cholesterol than for high density lipoprotein (HDL) cholesterol or triglycerides.<sup>12</sup> Parent-child correlations of NMR metabolites have not been reported previously.

Here, we present (1) NMR-based metabolomics analysis of a population-based cohort of 11-12 year old children and their parents, (2) identify age and sex-specific metabolomic profiles and (3) report sex-specific parent-child concordance.

## METHODS

**Study Design:** The Child Health CheckPoint comprised a detailed cross-sectional assessment of physical health and biomarkers in a population-based national sample of children (age 11-12 years) and their parents between February 2015 to March 2016. The CheckPoint was nested between waves 6 (2014) and 7 (2016) of the Longitudinal Study of Australian Children.<sup>13</sup> The Longitudinal Study of Australian Children commenced in 2004, when two cohorts (the 'B' and 'K' cohorts, of which the B cohort only was included in the present study) were recruited who have since been followed biennially. Further details regarding the CheckPoint study design and methods are available elsewhere.<sup>14</sup>

**Participants:** Of the 8,921 families contacted to be part of the LSAC B cohort 5,107 families (57%) agreed to take part in the first wave of data collection in 2004; 4,484 families were retained for Wave 6 in 2014. During the Wave 6 LSAC home visit, B cohort families were introduced to the upcoming Child Health CheckPoint and asked to consent to their contact details being shared with the CheckPoint team. A total of 3,513 families provided permission to receive an information pack by mail and an information and recruitment phone call regarding the CheckPoint study (78% of Wave 6 cohort, 69% of original cohort). Of the families agreeing to receive information about the CheckPoint study, 1,874 families took part (53% of eligible participants, 42% of Wave 6 cohort and 37% of original cohort).

**Ethics and consent:** The CheckPoint data collection protocol was approved by The Royal Children's Hospital (Melbourne, Australia) Human Research Ethics Committee (33225D) and the Australian Institute of Family Studies Ethics Committee (14-26). The attending parent/caregiver provided written informed consent for themselves and their child to participate in the study, and asked to provide optional consent for the collection and use of biological samples.

**Procedure:** The specialised CheckPoint assessment centre sequentially visited six Australian capital cities and nine smaller regional centres between February 2015 and March 2016.<sup>14</sup> Each participating child attended the centre with one parent or caregiver (usually the

1 biological mother) at which both participated in a wide range of measures relevant to non-  
2 communicable disease. Those families who could not attend a centre were offered a home  
3 visit. Participants were included in the current analyses if metabolomic data from CheckPoint  
4 were available (figure 1). Venous blood was not available for home-visit participants, but was  
5 collected at all capital city and most regional assessment centres. Participant pairs were  
6 excluded from the concordance analyses in this study if the attending parent was not the  
7 biological parent.

8 An experienced phlebotomist collected approximately 28mL of blood from the brachial vein  
9 of the non-dominant arm of semi-reclining, semi-fasted participants (at the time of collection,  
10 participants reported when they last ate or drank). Blood was collected sequentially into four  
11 vacutainer tubes using a butterfly needle so only a single venepuncture was required. Order  
12 of collection was (i) 2.7mL EDTA, (ii) 9mL EDTA, (iii) 9mL serum, (iv) 7.5mL Lithium  
13 Heparin. The latter two tubes were immediately inverted 6 times to ensure mixing with  
14 anticoagulant, and all tubes were transferred to the on-site laboratory. Time of collection was  
15 scheduled earlier in the visit for parents than for children.

16 Collection tube barcodes were linked to the participant and samples were immediately  
17 transported to an on-site laboratory where they were processed within two hours into 0.5mL  
18 aliquots of plasma, serum, buffy coat (lymphocytes), whole blood and/or an aliquot tube  
19 containing a blood clot (1.0mL FluidX screwcap tubes, Cheshire, UK) and stored  
20 immediately at -809°C (Thermo Fisher Scientific, Waltham, USA). Each FluidX tube  
21 contained a unique 2D barcode linked to the original collection tube and participant. As each  
22 assessment centre closed, samples were shipped on dry ice to the Melbourne Children's  
23 Bioresource Centre for long term storage at -80°C (serum, whole blood, plasma, blood clot)  
24 or vapour phase liquid nitrogen (lymphocytes). At a later date, single 0.5ml serum aliquot  
25 was removed for every CheckPoint participant and the combined aliquots were shipped in a  
26 single batch to Nightingale Health (Helsinki, Finland) on dry ice for NMR metabolomics.

## 27 **Measures**

### 28 29 Metabolomic profiling

30 The Nightingale<sup>®</sup> NMR metabolomics platform (Helsinki, Finland) was used to obtain  
31 metabolomics for children and parents using the 2016-version quantification algorithm.  
32 Details of this platform and methodology have been extensively described elsewhere,<sup>6 15</sup> and  
33 epidemiological applications were recently reviewed.<sup>16</sup> Briefly, metabolites were measured  
34 from 0.35mL of serum using a single high-throughput experimental setup for the  
35 simultaneous quantification of routine lipids, lipoprotein subclass distributions, particle size  
36 and composition, fatty acids, and other low-molecular weight metabolites such as amino



1 acids and glycolysis-related metabolites. This generated data on 228 serum metabolite  
 2 measures in absolute concentration units (eg millimoles per liter) and ratios (summarised in  
 3 Table 1). Whilst widely used for epidemiological research, the NMR-based quantification has  
 4 not been certified for clinical diagnostics. Further analytical validation of the quantification  
 5 protocols for the biomarker subset routinely used in clinical settings (eg established  
 6 cholesterol measures and creatinine) is expected to lead to recalibration of certain metabolite  
 7 concentrations to better match clinical gold standards.<sup>16</sup>

8 **Table 1. Summary of biomarkers and derived variables obtained via high-throughput NMR**

| Metabolic group                 | Species and derived measures                                                                           |
|---------------------------------|--------------------------------------------------------------------------------------------------------|
| Amino acids                     | Alanine, Glutamine, Glycine, Histidine                                                                 |
|                                 | Branched chain: Isoleucine, Leucine, Valine                                                            |
|                                 | Aromatic: Phenylalanine, Tyrosine                                                                      |
| Cholesterol                     | VLDL, LDL, HDL, HDL2, HDL3, Total, Free, Esterified, Remnant                                           |
| Triglycerides and phospholipids | Triglycerides (VLDL, LDL, HDL, total)                                                                  |
|                                 | Phosphoglycerides                                                                                      |
|                                 | Ratio of triglycerides to phosphoglycerides*                                                           |
|                                 | Phosphatidylcholine                                                                                    |
|                                 | Sphingomyelins                                                                                         |
|                                 | Total cholines                                                                                         |
| Apolipoproteins                 | Apolipoprotein A-1 (ApoA-1)                                                                            |
|                                 | Apolipoprotein B (Apo B)                                                                               |
|                                 | Ratio of Apolipoprotein B to Apolipoprotein A-1 (ApoB/Apo A-1)*                                        |
| Fatty acids (FA)                | Total, Omega-3, Omega-6, Polyunsaturated (PUFA), Saturated (SFA)                                       |
|                                 | Monounsaturated (MUFA), Docosahexaenoic acid (DHA), Linoleic (LA)                                      |
|                                 | Estimated degree of unsaturation                                                                       |
| Fatty acid ratios               | Omega-3/total FA*, Omega-6/total FA*, PUFA/total FA* (all %)                                           |
|                                 | SFA/total FA*, MUFA/total FA*, DHA/total FA*, LA/total FA* (all %)                                     |
| Lipoprotein subclasses*         | 12 lipids in each of 14 subclasses:<br>VLDL (XXL, XL, L, M, S, XS), IDL, LDL (L,M,S), HDL (XL, L, M,S) |
| Lipoprotein size*               | Mean diameter of VLDL, LDL and HDL particles                                                           |
| Ketone bodies                   | Acetate, Acetoacetate, 3-hydroxybutyrate                                                               |
| Glycolysis related              | Glucose, Lactate, Pyruvate, Citrate, Glycerol                                                          |
| Fluid balance                   | Creatinine, Albumin                                                                                    |
| Inflammation                    | Glycoprotein acetyls (GlycA)                                                                           |

9 Information obtained from <https://nightingalehealth.com/science/biomarkers>

10 \* ratio; ApoA-1: Apolipoprotein A-1; Apo B: Apolipoprotein B; DHA: Docosahexaenoic acid; GlycA: Glycoprotein acetyls;  
 11 HDL: High-density lipoprotein; IDL: Intermediate density lipoprotein; L: Large; LDL: Low-density lipoprotein; LA:  
 12 Linoleic acid; M: Medium; MUFA: Monounsaturated fatty acid; PUFA: Polyunsaturated fatty acid; S: Small; SFA:  
 13 Saturated fatty acids; VLDL: Very low density lipoprotein; XL: Very large; XXL: Chylomicrons and extremely large; XS:  
 14 Very small.

15  
 16 Many of the 228 metabolomics measures correlate substantially both in adults  
 17 (supplementary figure 1) and children (supplementary figure 2). For clarity, we therefore  
 18 focussed on an informative subset of 70 lipid and metabolites in analyses that capture the  
 19 majority of variation within the dataset. Most metabolites were reported as absolute

1 concentrations (ie not including ratios). We excluded glucose and lactate given the known  
2 sensitivity of these measures to variable time of fasting and specific processing variables.  
3 Some derived ratios, such as fatty acids and apolipoprotein B to apolipoprotein A-1, were  
4 included because of previous data indicating clinical utility.<sup>17</sup>

#### 5 Other measures and sample characteristics

6 *Age and sex:* Child date of birth and sex were obtained as detailed elsewhere.<sup>14</sup> The attending  
7 parent reported their own date of birth and sex by questionnaire. Age at assessment was  
8 calculated to nearest week.

9 *Body mass index:* Using a portable stadiometer (Invicta IP0955, Leicester, UK), participant  
10 height was measured without shoes, in light clothing, and in duplicate, to the nearest 0.1 cm.  
11 A third measurement was taken if the difference of the first two height measurements was  
12 greater than 0.5 cm; final height was the mean of all measurements made. Weight, to the  
13 nearest 0.1 kg, was measured with an InBody230 bio-electrical impedance analysis scale  
14 (Biospace Co. Ltd. Seoul, South Korea). Body mass index (BMI; kg/m<sup>2</sup>) was calculated, and  
15 for children was converted to age- and sex-adjusted z-score using the 1970 US Centers for  
16 Disease Control (CDC) growth reference charts.<sup>18</sup>

17 *Socioeconomic Disadvantage:* Neighbourhood socioeconomic position data were obtained  
18 from the 2011 Australian Census Socio-Economic Indexes for Areas scores of the postcode  
19 region where the participating family lived. This paper used the Socio-Economic Indexes for  
20 Areas Index of Relative Socio-economic Disadvantage (Disadvantage Index), a standardised  
21 score that summarises the social and economic conditions of Australian neighbourhoods  
22 (national mean of 1000 and a standard deviation (SD) of 100, where higher values represent  
23 less disadvantage).<sup>19</sup>

24 *Time of blood collection, processing and fasting time:* Time of blood collection and start of  
25 laboratory processing were recorded. When missing, collection time was estimated using the  
26 midpoint between the time the CheckPoint visit began and time that processing of the sample  
27 commenced. Processing lag time was calculated as the minutes between blood collection and  
28 the processing commencement. Most samples were processed within two hours.

29 Fasting time was calculated as the hours between last eating/drinking to time of blood  
30 collection. The last time of eating/drinking was cross-checked against when the participant  
31 was taking part in other CheckPoint stations (and known not to be eating) as well as sleep and  
32 wake times from accelerometry data (to identify usual activity, and therefore likely eating  
33 patterns) when available. Further details of cleaning processes for the time of last eat/drink  
34 can be found elsewhere.<sup>20</sup>



## 1 **Statistical analysis**

2 Continuous descriptive variables were summarised using weighted means and standard  
3 deviations (SD) for children and adults separately, by sex and overall. Summaries of parent  
4 and child metabolite measures we focussed on were reported using weighted means and SDs,  
5 or weighted geometric means and relative SD for skewed metabolites, for children and adults  
6 separately, by sex and overall. Population summary statistics were estimated by applying  
7 survey weights and survey procedures that corrected for sampling, participation and non-  
8 response biases, and took into account clustering in the sampling frame. Standard errors were  
9 calculated taking into account the complex design and weights.<sup>21</sup> More detail on the  
10 calculation of weights is provided elsewhere.<sup>22</sup>

11 To compare the distribution of metabolites by age and sex, density plots were examined.  
12 Skewed metabolites (skewness greater or equal to 2) were log-transformed. We used two-  
13 sided paired t-tests to compare mean metabolite concentrations between children and adults  
14 in parent-child dyads, and t-tests to compare mean metabolite concentrations between  
15 males and females for children and adults separately. The analyses were repeated using  
16 weighted multi-level survey analyses and compared to unweighted analyses. As there  
17 appeared to be no major effect of response patterns on results we reported results from  
18 unweighted analyses.

19 Concordance between parents and children was assessed by 1) Pearson's correlation  
20 coefficients (CC) with 95% confidence intervals, and 2) partial correlation coefficients  
21 (PCC), controlling for age, socioeconomic status, fasting time and processing lag time. In  
22 addition, the Pearson's correlation coefficients described above were repeated using weighted  
23 multi-level survey analyses and compared to unweighted analyses. As there appeared to be no  
24 major effect of response patterns on results we reported results from unweighted analyses.  
25 Scatterplots of parent versus child metabolites (log-transformed where needed as above) were  
26 examined to check for outliers and to ensure assumptions were met.

27 Analyses were undertaken using Stata version 14.2 and R version 3.3.2.

28

## 1 RESULTS

### 3 Sample characteristics

5 The recruitment and retention of participants in the Child Health CheckPoint are described  
6 elsewhere.<sup>14</sup> Of the 1874 families who participated in CheckPoint assessment centres, blood  
7 serum samples of analysable quality from 1180 children and 1325 parents (figure 1) were  
8 sent for NMR quantification of metabolites. The majority of excluded families undertook  
9 home visits or attended a regional centre, where blood samples could not be collected (n=385,  
10 20.5%), while some participants declined a blood sample (children, n=150, 8.0%; adults,  
11 n=108, 5.8%). Few data were lost due to insufficient volume or poor quality samples at the  
12 assessment centre (figure 1). The sample characteristics of parents and children are outlined  
13 in table 2. Summary statistics for our main child and parent metabolite measures are  
14 presented in supplementary table 1.

**Table 2: Sample characteristics; values are weighted mean (standard deviation)**

| Characteristic                 | All         | Male        | Female      |
|--------------------------------|-------------|-------------|-------------|
| <b>Child</b>                   |             |             |             |
| n                              | 1152-1180   | 558-575     | 594-605     |
| Age, years                     | 12.0 (0.4)  | 12.0 (0.4)  | 12.0 (0.4)  |
| BMI, (kg/m <sup>2</sup> )      | 19.4 (3.5)  | 19.2 (3.4)  | 19.6 (3.7)  |
| BMI z-score                    | 0.38 (1.0)  | 0.40 (1.0)  | 0.37 (1.0)  |
| Disadvantage Index             | 1012 (63)   | 1011 (65)   | 1014 (61)   |
| Fasting time (hours)           | 4.2 (1.2)   | 4.3 (1.3)   | 4.2 (1.1)   |
| Time of day - blood collection | 14.16 (2.0) | 14.12 (2.0) | 14.20 (2.1) |
| <b>Parent</b>                  |             |             |             |
| n                              | 1272 - 1325 | 174-177     | 1098-1148   |
| Age, years                     | 43.9 (5.6)  | 46.9 (6.9)  | 43.4 (5.2)  |
| BMI, (kg/m <sup>2</sup> )      | 28.4 (6.4)  | 28.9 (4.7)  | 28.4 (6.6)  |
| Fasting time (hours)           | 3.3 (1.6)   | 3.6 (2.0)   | 3.2 (1.5)   |
| Time of day - blood collection | 13.10 (2.0) | 13.18 (2.1) | 13.09 (2.0) |

BMI, body mass index; Disadvantage Index: Index of Relative Socioeconomic Disadvantage; n: number of participants in cohort with this measure.

#### **Differences in metabolite levels in children and adults**

Figure 2 shows differences in mean metabolite levels for adults relative to children in standard deviation (SD) units. Most concentrations were higher in adults than children. Values that were similar in adults and children included total lipids in very large HDL lipoprotein subclass particles, acetoacetate, tyrosine and VLDL particle size. Levels in children were higher than those of adults for the glycolysis related measures (pyruvate, citrate and glycerol), the ketone body 3-hydroxybutrate, the amino acid glutamine, many fatty acid ratios and LDL and HDL particle sizes.

Supplementary table 2 lists the corresponding estimates in absolute concentration units, while supplementary figures 3-7 show density plots comparing the distributions of metabolites for boys, girls and adults.

#### **Sex-specific differences in metabolite levels in children and adults**

Figure 3 shows differences in mean metabolite levels by sex for children and adults separately in SD units, with estimates in absolute concentration units listed in supplementary table 3 and 4.

1 In general, sex differences appeared more pronounced in adulthood, resulting in distinct  
2 overall patterns for children and adults. Children generally showed smaller differences by sex  
3 than adults. Of note, sex differences for apolipoproteins, fatty acids and inflammation  
4 measures showed different patterns in children compared to adults.

5 Girls had lower levels of apolipoprotein-A-1 (ApoA-1) and higher ApoB than boys. In adults,  
6 the opposite pattern was observed with mothers having higher ApoA-1 and lower ApoB than  
7 fathers. In children, most fatty acid concentrations were similar in girls and boys. In contrast,  
8 many adult fatty acid measures were higher in fathers. There was no evidence of a difference  
9 in the level of inflammation (GlycA) by sex in children. In adults, GlycA levels were higher  
10 in fathers than mothers.

11 For some metabolites, sex differences in children mirrored (but were smaller than) those of  
12 adults, particularly for the ketone bodies acetate and acetoacetate and some key amino acids.  
13 At both ages, the amino acid glycine was higher in females but the branched-chain amino  
14 acids leucine and valine were higher in males.

### 15 **Parent-child concordance**

16 Figure 4 shows the correlations between metabolite measures for all children with all parents,  
17 and for boys and girls with mothers (but not with the 177 fathers, given the small numbers).  
18 The corresponding correlation coefficients and partial correlation coefficients are listed in  
19 supplementary tables 5 and 6.

20 A positive correlation was found for many metabolite measures irrespective of child sex, with  
21 Correlation Coefficients (CC) ranging from 0.03 (95% CI -0.05 to 0.12) for acetoacetate in  
22 mother-daughter pairs to 0.39 (95% CI 0.31 to 0.47) for isoleucine in mother-son  
23 comparisons. Additional adjustment for factors that potentially influence metabolite levels  
24 (age, socioeconomic status, fasting time and processing lag time) had little effect on the  
25 degree of correlation in any comparison (supplementary tables 5 and 6). Correlations for all  
26 parents and all children showed similar patterns to that observed for mother and child by sex.

27 Confidence intervals (95%) for all mother-son and mother-daughter correlations overlapped.  
28 However, some metabolites showed differences by child sex. For example, fatty acids and 3-  
29 hydroxybutyrate were more highly correlated in mother-daughter than mother-son pairs.  
30 Other metabolites were more highly correlated in mother-son than mother-daughter  
31 comparisons, including acetoacetate and the branched-chain amino acids (isoleucine, leucine  
32 and valine).

## 1 **DISCUSSION**

### 2 **Principal findings**

3 Here we present age and sex differences on the detailed/NMR-based metabolic profiles from  
4 1133 Australian parent-child dyads, and demonstrate that many metabolite measures have  
5 high parent-child concordance. In accord with previous studies, we identified major  
6 differences in metabolite levels between childhood and adulthood and also sex-specific  
7 profiles in both childhood and adulthood. We also observed variability in the level of sex-  
8 specific differences for several metabolites in childhood compared to adulthood and  
9 identified a complex interplay of correlations of specific metabolites between parents and  
10 their children according to parent-child sex relationships.

### 11 **Strengths and weaknesses**

12 This is the first major cohort study to report both sex- and cross-generational differences in  
13 metabolomic concentrations in mid-childhood to adulthood utilising the NMR platform.  
14 Further strengths include the large number of parent-child dyads representing a wide range of  
15 parent ages, the national population-based sample and the state-of-the-art measurements.  
16 Replication studies exploring sex differences at earlier and later stages of childhood and  
17 adolescence would strengthen findings.

18 An important limitation is that paternal factors were not fully represented, as most parental  
19 samples were from mothers (a well-documented problem in longitudinal cohort studies). This  
20 also limited sex-specific parental contribution analysis; further studies including more fathers  
21 are warranted. Additional limitations are that, without samples from both parents for each  
22 child, we could not estimate heritability, and our results might not apply to mid-life adults  
23 who are not parents (although we see no good reason why these would differ greatly). The  
24 original uptake of just over 50% and subsequent attrition within LSAC and then the  
25 CheckPoint has led to a relatively advantaged sample, but nonetheless participants varied  
26 widely on key potential confounders (eg disadvantage, age) and this was at least partly offset  
27 by application or consideration of survey weights. Given the large number of metabolites and  
28 modest sample size, considerable uncertainty remains in any ranking of the various effects  
29 across metabolites.

### 30 **Meaning and implications for clinicians and policymakers**

31 Overall, we found a clear difference in metabolite profile between children and their parents.  
32 This was apparent for specific metabolite measures (such as some amino acids) as well as the

1 distribution of metabolites (such as lipid composition of lipoproteins of different density).  
2 Some measures were higher in adults, some similar, while a minority were lower. Previous  
3 studies, largely in adults, have identified a range of specific metabolite changes with age,  
4 particularly from mid to late adulthood.<sup>23</sup> This includes a general decrease in several amino  
5 acid species, which contrasts with our findings from childhood to mid adulthood.<sup>8</sup> Only the  
6 amino acid glutamine showed this pattern in our dataset.

7 Sex-specific differences in children ( $\pm 0.2$  SD) were generally much smaller than in adults  
8 ( $\pm 0.8$  SD). Large metabolomic studies using alternative platforms have previously reported  
9 reproducible, sex-specific signatures in circulating metabolite profile in adults.<sup>24 25</sup> This  
10 includes differences in amino acid and lipid serum concentrations, potentially influenced by  
11 sex-specific effects of genetic polymorphisms on metabolite levels.<sup>25 26</sup> As in our study,  
12 most amino acids have usually been reported to be higher in men than women.<sup>25 27</sup> For  
13 example, in a recent study of 507 metabolic markers in 1756 individuals (903 female and 853  
14 male aged  $\sim 60$  years), one third of metabolites showed significant sexual dimorphism. These  
15 were predominantly related to pathways of steroid metabolism, fatty acids, other lipids, and a  
16 large proportion of amino acids.<sup>27</sup> Of particular note, branched chain amino acids (BCAAs)  
17 and their related metabolic products were amongst the most differentially represented, with  
18 much higher isoleucine, leucine and valine in males. A similar finding of higher leucine and  
19 valine was also noted in the Cooperative Health Research in the Region of Augsburg  
20 (KORA) follow-ups 3 (F3) and 4 (F4) analysis of  $>3000$  adults,<sup>25</sup> consistent with our  
21 observations in adulthood.

22 In children, we found sex-specific differences for leucine and valine were smaller but in the  
23 same direction as adults. Several lines of evidence implicate BCAA metabolism with  
24 metabolic risk in humans. For example, three candidate genes for obesity and/or type 2  
25 diabetes mellitus (T2DM) are involved in the BCAA metabolic pathway.<sup>28</sup> In a recent large  
26 meta-analysis of metabolomics in diabetes, a  $>30\%$  higher risk of type 2 diabetes was found  
27 per SD increase in isoleucine, leucine, valine or tyrosine, whereas glycine and glutamine  
28 were inversely associated with risk.<sup>28</sup> Several clinical studies have also reported that BCAAs  
29 positively correlate with insulin resistance, homeostatic model assessment (HOMA) index  
30 and levels of haemoglobin A1c (HbA1c), while longitudinal studies have reported that  
31 increased blood BCAAs are predictive of future insulin resistance and type 2 diabetes  
32 (T2D).<sup>29</sup> It is intriguing to speculate that the higher BCAA in males from early life could  
33 contribute to the well-described increasing prevalence of T2D in men. Levels of BCAA are

1 elevated in females with Polycystic Ovary Syndrome (PCOS), potentially contributing to the  
2 associated insulin resistance.<sup>30</sup> However, it remains unclear whether BCAA are on the causal  
3 pathway to T2D or result from adverse metabolic health. Our demonstration that the sex-  
4 specific differences in BCAA arise early in life offers potential to track their association with  
5 sex-specific measures of metabolic health from an early age to help clarify where they lie on  
6 the causal pathway.

7 In accord with previous adult studies<sup>25</sup>, we found higher levels of glycine in mothers than  
8 fathers, and (less markedly) in girls than boys. Interestingly, recent metabolomics and genetic  
9 analyses of ~10,000 adults with cardiovascular disease (CVD), with replication in >53,000  
10 subjects, identified a genetic variant in carbamoyl-phosphate synthase 1 (*CPS1*) (linked to  
11 plasma glycine levels) to be strongly associated with a reduced risk of CVD in women  
12 ( $p=6.3 \times 10^{-5}$ ) but not men ( $p=0.95$ ), suggesting a direct link between glycine levels and CVD  
13 risk, although whether this is a causal association remains unclear.<sup>31</sup> It will be interesting in  
14 the future to explore the link between variants in *CPS1* and circulating glycine levels from  
15 early life to adulthood in relation to markers of cardiovascular health in females.

16 The small sex-differences of HDL cholesterol and ApoA-1 in children compared to adults is  
17 consistent with modest differences in children, whereas substantial differences in adulthood  
18 have previously been reported.<sup>32</sup> ApoA-1 was more abundant in boys, while ApoB was  
19 higher in girls, leading to a higher ApoB/ApoA-1 ratio in girls. The opposite pattern was  
20 found in our limited sample of fathers relative to mothers. These data are surprising and  
21 differ from a similarly sized study of slightly older European adolescent children (mean age  
22 15 years) that found higher ApoA-1 and ApoB in girls relative to boys.<sup>33</sup> Interestingly, a  
23 higher ApoB/ApoA-1 ratio has been strongly linked to increased coronary risk in adults,<sup>34-36</sup>  
24 suggesting that the sex-specific differences may alter with increasing age, in keeping with the  
25 increased CVD risk in adult males. ApoA-1 is the main protein component of HDL  
26 cholesterol<sup>37</sup> thus the differences in trajectories in lipids and HDL cholesterol for boys and  
27 girls across childhood that have been reported<sup>38,39</sup> could partially explain this observation.

28 These are the first data on the mother-child or parent-child correlations of NMR metabolites.  
29 Smaller studies have reported positive correlations between parents and children for a limited  
30 range of cardiometabolic risk factors including total cholesterol, LDL cholesterol, HDL  
31 cholesterol and triglycerides measured using conventional methods. We found positive  
32 correlations between parents and children for the same lipid measures (although measured  
33 using NMR) consistent with previously reported findings. One study reported a positive



1 association between the serum lipid levels of 4 year old children (n=127) and their parents  
2 (122 mothers and 118 fathers)<sup>40</sup> while another study of children aged 6-18 (n=255) and their  
3 parents (n=179) found that the age of the child influenced the degree of correlation of several  
4 lipid measures, with older (10-18 years) children more similar to their parents in terms of  
5 triglyceride levels than younger individuals (6-9 years).<sup>12</sup>

## 6 **Unanswered questions and future research**

7 The temporal and sex specific dynamism of the metabolomics data we describe here offer  
8 considerable opportunities for identification of biomarkers of risk for a range of non-  
9 communicable diseases early in life, to inform targeted interventions and monitor their  
10 efficacy. Combining metabolomics with other 'omics data (such as genetics), as is  
11 increasingly reported from large adult studies, offers considerable promise in understanding  
12 the causal pathways that link early life exposures, genetics and intermediate phenotypes with  
13 later onset chronic disease, and in identifying clinically relevant biomarkers.

14 In conclusion, we report detailed circulating metabolite profile from mid-childhood and  
15 adulthood in a population-based sample, together with parent-child concordance and sex-  
16 specific profiles in children and adults. Distinct age- and sex-specific profiles were observed,  
17 as well as considerable evidence of parent-child concordance. These data will be informative  
18 for investigation of the childhood origins of adult non-communicable diseases and for  
19 comparative studies across populations.



## 1 ACKNOWLEDGEMENTS

2 This paper uses unit record data from *Growing Up in Australia*, the Longitudinal Study of  
3 Australian Children. The study is conducted in partnership between the Department of Social  
4 Services (DSS), the Australian Institute of Family Studies (AIFS) and the Australian Bureau  
5 of Statistics (ABS). The findings and views reported in this paper are those of the author and  
6 should not be attributed to DSS, AIFS or the ABS.

7  
8 REDCap (Research Electronic Data Capture) tools<sup>41</sup> were used in this study. More  
9 information about this software can be found at: [www.project-redcap.org](http://www.project-redcap.org).

10 We thank the LSAC and CheckPoint study participants, staff and students for their  
11 contributions.

## 12 COMPETING INTERESTS

13  
14 All authors have completed the ICMJE uniform disclosure form at  
15 [www.icmje.org/coi\\_disclosure.pdf](http://www.icmje.org/coi_disclosure.pdf) and declare financial support for the submitted work from  
16 the National Health and Medical Research Council of Australia, The Royal Children's  
17 Hospital Foundation, the Murdoch Children's Research Institute, The University of  
18 Melbourne, the National Heart Foundation of Australia, and the Financial Markets  
19 Foundation for Children. Personal fees were received by MW from the Australian  
20 Department of Social Services and by PW from Nightingale Health Ltd. MW and DB are  
21 supported by the NHMRC; DB by the National Heart Foundation of Australia; and MW by  
22 Cure Kids New Zealand. MW received grants from NZ Ministry of Business, Innovation &  
23 Employment and A Better Start/Cure Kids New Zealand, and support from Sandoz to present  
24 at a symposium outside the submitted work. PW is employee and shareholder of Nightingale  
25 Health Ltd, a company offering NMR-based metabolic profiling.

## 26 FUNDING

27  
28 This work was supported by the National Health and Medical Research Council (NHMRC)  
29 of Australia (Project Grants 1041352, 1109355), The Royal Children's Hospital Foundation  
30 (2014-241), the Murdoch Children's Research Institute, The University of Melbourne, the  
31 National Heart Foundation of Australia (100660) and the Financial Markets Foundation for  
32 Children (2014-055, 2016-310). NHMRC Senior Research Fellowships supported MW  
33 (1046518), DB (1064629) and RS (1045161). MW was supported by Cure Kids New Zealand

1 and DB holds an Honorary Future Leader Fellowship of the National Heart Foundation of  
2 Australia (100369). PW is supported by Academy of Finland (grant numbers 312476 and  
3 312477).

4 The MCRI administered the research grants for the study and provided infrastructural support  
5 (IT and biospecimen management) to its staff and the study, but played no role in the conduct  
6 or analysis of the trial. DSS played a role in study design; however, no other funding bodies  
7 had a role in the study design and conduct; data collection, management, analysis, and  
8 interpretation; preparation, review, or approval of the manuscript; and decision to submit the  
9 manuscript for publication. Research at the MCRI is supported by the Victorian  
10 Government's Operational Infrastructure Support Program.

## 12 **CONTRIBUTIONS**

14 DB, RS and JC conceptualised and developed the Metabolomics Checkpoint study. SE and  
15 JC undertook all aspects of data analysis. SAC coordinated the acquisition of metabolomics  
16 data and provided critical review of this manuscript. MW, the Principal Investigator of the  
17 Child Health CheckPoint, planned the analyses and provided critical review of this  
18 manuscript. SE and RS drafted the manuscript. PW, MJ, TD, KL, JC, DB provided critical  
19 expert advice and critical review of this manuscript.

## 20 **DATA SHARING STATEMENT**

22 Dataset and technical documents available from *Growing Up in Australia: The Longitudinal*  
23 *Study of Australian Children* via low-cost license for bona fide researchers. More information  
24 is available at [www.growingupinaustralia.gov.au](http://www.growingupinaustralia.gov.au)

1  
2  
3  
4  
5  
6  
7  
8  
9  
10  
11  
12  
13  
14  
15  
16  
17  
18  
19  
20  
21  
22  
23  
24  
25  
26  
27  
28  
29  
30  
31  
32  
33  
34  
35  
36  
37  
38  
39  
40  
41  
42  
43  
44  
45  
46  
47  
48  
49  
50  
51  
52  
53  
54  
55  
56  
57  
58  
59  
60

## 1 **FIGURE CAPTIONS AND FOOTNOTES**

2

### 3 **Figure 1: Participant flow chart.**

4 n=number of families, c=number of children, p=number of attending adults,

5 MAC=Main assessment centre, mAC=Mini assessment centre, HV=Home visit assessment,

6 LSAC=Longitudinal Study of Australian Children

7 \*Unable to analyse due to insufficient volume or poor quality sample

8 ^Data from 6 non-biological child-parent pairs excluded from concordance analyses

9

### 10 **Figure 2: Differences in metabolite levels between children and adults.**

11 Association measures are SD difference in metabolite concentration for adults compared to  
12 children. Error bars represent 95% confidence intervals. Association measures in absolute  
13 concentration units, 95% confidence intervals and associated p-values are listed in  
14 supplementary table 2. HDL: High-density lipoprotein; IDL: Intermediate density  
15 lipoprotein; LDL: Low-density lipoprotein; VLDL: Very low density lipoprotein.

16

### 17 **Figure 3: Sex-specific differences in metabolite levels in childhood and adulthood.**

18 Association measures are SD difference in metabolite concentration for females compared to  
19 males in children (A) and adults (B). Error bars represent 95% confidence intervals.  
20 Association measures in absolute concentration units, 95% confidence intervals and  
21 associated p-values are listed in supplementary table 3 and 4. HDL: High-density lipoprotein;  
22 IDL: Intermediate density lipoprotein; LDL: Low-density lipoprotein; VLDL: Very low  
23 density lipoprotein.

24

### 25 **Figure 4: Parent:child correlation for metabolite measures.**

26 Pearson's correlation coefficients for all children with all parents (A); and for boys (blue)  
27 with mothers and for girls (red) with mothers (B). Error bars represent 95% confidence  
28 intervals. Correlation coefficients with associated 95% confidence intervals are listed in  
29 supplementary table 5 and 6. HDL: High-density lipoprotein; IDL: Intermediate density  
30 lipoprotein; LDL: Low-density lipoprotein; VLDL: Very low density lipoprotein.

31

## **SUPPLEMENTARY DOCUMENTS**

### **Supplementary figure 1: Correlation of NMR metabolite measures in children.**

Heatmap showing the correlation between metabolite measures in children. The correlations shown are Spearman's correlation coefficients with blue cells representing negative correlations and red cells representing positive correlations.

### **Supplementary figure 2: Correlation of NMR metabolite measures in parents.**

Heatmap showing the correlation between metabolite measures in parents. The correlations shown are Spearman's correlation coefficients with blue cells representing negative correlations and red cells representing positive correlations.

### **Supplementary figure 3: Density plots for cholesterol and apolipoprotein measures.**

Boys (blue), girls (red), and all parents (thin dotted black line) plotted on the same graph for each cholesterol and apolipoprotein measure.

### **Supplementary figure 4: Density plots for fatty acid and fatty acid ratio measures.**

Boys (blue), girls (red), and all parents (thin dotted black line) plotted on the same graph for each fatty acid and fatty acid ratio measure.

### **Supplementary figure 5: Density plots for total lipids in the 14 lipoprotein subclass particles.**

Boys (blue), girls (red), and all parents (thin dotted black line) plotted on the same graph for total lipids within each of the 14 lipoprotein subclass particles.

### **Supplementary figure 6: Density plots for lipoprotein particle size and triglyceride measures.**

Boys (blue), girls (red), and all parents (thin dotted black line) plotted on the same graph for lipoprotein particle sizes and triglyceride measures.

### **Supplementary figure 7: Density plots for glycolysis related, amino acid, ketone body and inflammation measures.**

Boys (blue), girls (red), and all parents (thin dotted black line) plotted on the same graph for glycolysis related, amino acid, ketone body and inflammation measures.

### **Supplementary table 1: Weighted mean (SD) of metabolite measures in children and parents.**

### **Supplementary table 2: Differences in mean metabolite levels in adults compared to children in absolute concentration units.**

1  
2  
3  
4  
5  
6  
7  
8  
9  
10  
11  
12  
13  
14  
15  
16  
17  
18  
19  
20  
21  
22  
23  
24  
25  
26  
27  
28  
29  
30  
31  
32  
33  
34  
35  
36  
37  
38  
39  
40  
41  
42  
43  
44  
45  
46  
47  
48  
49  
50  
51  
52  
53  
54  
55  
56  
57  
58  
59  
60

1 **Supplementary table 3: Differences in mean metabolite levels in girls compared to boys**  
2 **in absolute concentration units.**

4 **Supplementary table 4: Differences in mean metabolite levels in female compared to**  
5 **male adults in absolute concentration units.**

7 **Supplementary table 5: Mother-child concordance; correlations and partial correlations**  
8 **between mothers and their sons, daughters and all children.**

10 **Supplementary table 6: Parent-child concordance; correlation and partial correlations**  
11 **between all parents and their sons, daughters and all children.**

For peer review only

1  
2  
3 **1 REFERENCES**

- 4  
5  
6  
7  
8  
9  
10  
11  
12  
13  
14  
15  
16  
17  
18  
19  
20  
21  
22  
23  
24  
25  
26  
27  
28  
29  
30  
31  
32  
33  
34  
35  
36  
37  
38  
39  
40  
41  
42  
43  
44
1. Nicholson JK, Lindon JC, Holmes E. 'Metabonomics': understanding the metabolic responses of living systems to pathophysiological stimuli via multivariate statistical analysis of biological NMR spectroscopic data. *Xenobiotica* 1999;**29**(11):1181-9 doi: 10.1080/004982599238047.
  2. Nath AP, Ritchie SC, Byars SG, et al. An interaction map of circulating metabolites, immune gene networks, and their genetic regulation. *Genome biology* 2017;**18**(1):146 doi: 10.1186/s13059-017-1279-y.
  3. Shah SH, Newgard CB. Integrated metabolomics and genomics: systems approaches to biomarkers and mechanisms of cardiovascular disease. *Circ Cardiovasc Genet* 2015;**8**(2):410-9 doi: 10.1161/CIRCGENETICS.114.000223.
  4. Kaikkonen JE, Wurtz P, Suomela E, et al. Metabolic profiling of fatty liver in young and middle-aged adults: Cross-sectional and prospective analyses of the Young Finns Study. *Hepatology* 2017;**65**(2):491-500 doi: 10.1002/hep.28899.
  5. Johnson CH, Ivanisevic J, Siuzdak G. Metabolomics: beyond biomarkers and towards mechanisms. *Nat Rev Mol Cell Biol* 2016;**17**(7):451-9 doi: 10.1038/nrm.2016.25.
  6. Kettunen J, Tukiainen T, Sarin AP, et al. Genome-wide association study identifies multiple loci influencing human serum metabolite levels. *Nat Genet* 2012;**44**(3):269-76 doi: 10.1038/ng.1073.
  7. Suhre K, Gieger C. Genetic variation in metabolic phenotypes: study designs and applications. *Nat Rev Genet* 2012;**13**(11):759-69 doi: 10.1038/nrg3314.
  8. Yu Z, Zhai G, Singmann P, et al. Human serum metabolic profiles are age dependent. *Aging Cell* 2012;**11**(6):960-7 doi: 10.1111/j.1474-9726.2012.00865.x.
  9. Auro K, Joensuu A, Fischer K, et al. A metabolic view on menopause and ageing. *Nat Commun* 2014;**5**:4708 doi: 10.1038/ncomms5708.
  10. Saito K, Maekawa K, Kinchen JM, et al. Gender- and Age-Associated Differences in Serum Metabolite Profiles among Japanese Populations. *Biol Pharm Bull* 2016;**39**(7):1179-86 doi: 10.1248/bpb.b16-00226.
  11. Wang Q, Wurtz P, Auro K, et al. Metabolic profiling of pregnancy: cross-sectional and longitudinal evidence. *BMC Med* 2016;**14**(1):205 doi: 10.1186/s12916-016-0733-0.
  12. Halvorsen T, Moran A, Jacobs DR, Jr., et al. Relation of Cardiometabolic Risk Factors between Parents and Children. *J Pediatr* 2015;**167**(5):1049-56 e2 doi: 10.1016/j.jpeds.2015.07.053.
  13. Wake M, Clifford S, York E, et al. Introducing Growing Up in Australia's Child Health CheckPoint: A physical and biomarkers module for the Longitudinal Study of Australian Children. *Family Matters* 2014;**95**:15-23.
  14. Clifford S, Davies S, Wake M. Growing Up in Australia's Child Health CheckPoint cohort summary and methodology. Submitted to BMJ Open October 2017.
  15. Soininen P, Kangas AJ, Wurtz P, et al. High-throughput serum NMR metabonomics for cost-effective holistic studies on systemic metabolism. *Analyst* 2009;**134**(9):1781-5 doi: 10.1039/b910205a.
  16. Wurtz P, Kangas AJ, Soininen P, et al. Quantitative Serum NMR Metabolomics in Large-Scale Epidemiology: A Primer on -Omic Technology. *Am J Epidemiol* 2017.

17. Lu M, Lu Q, Zhang Y, et al. ApoB/apoA1 is an effective predictor of coronary heart disease risk in overweight and obesity. *J Biomed Res* 2011;**25**(4):266-73 doi: 10.1016/S1674-8301(11)60036-5.
18. Kuczmarski RJ, Ogden CL, Grummer-Strawn LM, et al. CDC growth charts: United States. *Adv Data* 2000(314):1-27.
19. Australian Bureau of S. Census of population and housing: Socio-Economic Indexes for Areas (SEIFA) 2011. Cat. no. 2033.0.55.001, 2011.
20. Davies S, Clifford S, Gillespie A, et al. LSAC's Child Health CheckPoint Data Issues Paper 2017. *Melbourne, Australia: Murdoch Children's Research Institute* 2017.
21. S.G. H, B.T. W, P.A. B. *Applied survey data analysis*. Boca Raton.: CRC press, 2010.
22. Ellul S, Hiscock R, Mensah F, et al. Longitudinal Study of Australian Children's Child Health CheckPoint: Weighting and Non-Response. 2017.
23. Menni C, Kastenmüller G, Petersen AK, et al. Metabolomic markers reveal novel pathways of ageing and early development in human populations. *International Journal of Epidemiology* 2013;**42**(4):1111-19 doi: 10.1093/ije/dyt094.
24. Dunn WB, Lin W, Broadhurst D, et al. Molecular phenotyping of a UK population: defining the human serum metabolome. *Metabolomics* 2015;**11**:9-26 doi: 10.1007/s11306-014-0707-1.
25. Mittelstrass K, Ried JS, Yu Z, et al. Discovery of sexual dimorphisms in metabolic and genetic biomarkers. *PLoS Genet* 2011;**7**(8):e1002215 doi: 10.1371/journal.pgen.1002215.
26. Kolz M, Johnson T, Sanna S, et al. Meta-analysis of 28,141 individuals identifies common variants within five new loci that influence uric acid concentrations. *PLoS Genet* 2009;**5**(6):e1000504 doi: 10.1371/journal.pgen.1000504.
27. Krumsiek J, Mittelstrass K, Do KT, et al. Gender-specific pathway differences in the human serum metabolome. *Metabolomics* 2015;**11**(6):1815-33 doi: 10.1007/s11306-015-0829-0.
28. Guasch-Ferré M, Hruby A, Toledo E, et al. Metabolomics in Prediabetes and Diabetes: A Systematic Review and Meta-analysis. *Diabetes Care* 2016;**39**(5):833-46 doi: 10.2337/dc15-2251.
29. Lynch CJ, Adams SH. Branched-chain amino acids in metabolic signalling and insulin resistance. *Nature reviews Endocrinology* 2014;**10**(12):723-36 doi: 10.1038/nrendo.2014.171.
30. Chang AY, Lalia AZ, Jenkins GD, et al. Combining a nontargeted and targeted metabolomics approach to identify metabolic pathways significantly altered in polycystic ovary syndrome. *Metabolism* 2017;**71**(Supplement C):52-63 doi: <https://doi.org/10.1016/j.metabol.2017.03.002>.
31. Hartiala JA, Wilson Tang WH, Wang Z, et al. Genome-wide association study and targeted metabolomics identifies sex-specific association of CPS1 with coronary artery disease. *Nature Communications* 2016;**7**:10558 doi: 10.1038/ncomms10558.
32. Davis CE, Williams DH, Oganov RG, et al. Sex Difference in High Density Lipoprotein Cholesterol in Six Countries. *American Journal of Epidemiology* 1996;**143**(11):1100-06 doi: 10.1093/oxfordjournals.aje.a008686.
33. Spinneker A, Egert S, Gonzalez-Gross M, et al. Lipid, lipoprotein and apolipoprotein profiles in European adolescents and its associations with gender, biological maturity and body fat--the HELENA Study. *Eur J Clin Nutr* 2012;**66**(6):727-35 doi: 10.1038/ejcn.2011.222.



- 1  
2  
3 1 34. Walldius G, Jungner I, Aastveit AH, et al. The apoB/apoA-I ratio is better than the  
4 2 cholesterol ratios to estimate the balance between plasma proatherogenic and  
5 3 antiatherogenic lipoproteins and to predict coronary risk. *Clin Chem Lab Med*  
6 4 2004;**42**(12):1355-63 doi: 10.1515/CCLM.2004.254.  
7 5  
8 5 35. Walldius G, Jungner I. The apoB/apoA-I ratio: a strong, new risk factor for cardiovascular  
9 6 disease and a target for lipid-lowering therapy--a review of the evidence. *J Intern*  
10 7 *Med* 2006;**259**(5):493-519 doi: 10.1111/j.1365-2796.2006.01643.x.  
11 8  
12 8 36. Mozaffarian D, Benjamin EJ, Go AS, et al. Heart disease and stroke statistics--2015  
13 9 update: a report from the American Heart Association. *Circulation* 2015;**131**(4):e29-  
14 10 322 doi: 10.1161/CIR.000000000000152.  
15 11  
16 11 37. Upadhyay RK. Emerging Risk Biomarkers in Cardiovascular Diseases and Disorders.  
17 12 *Journal of Lipids* 2015;**2015**:971453 doi: 10.1155/2015/971453.  
18 13  
19 13 38. Hardy R, Lawlor DA, Kuh D. A life course approach to cardiovascular aging. *Future*  
20 14 *cardiology* 2015;**11**(1):101-13 doi: 10.2217/fca.14.67.  
21 15  
22 15 39. Jolliffe CJ, Janssen I. Distribution of Lipoproteins by Age and Gender in Adolescents.  
23 16 *Circulation* 2006;**114**(10):1056.  
24 17  
25 17 40. Ohlund I, Hernell O, Hornell A, et al. Serum lipid and apolipoprotein levels in 4-year-old  
26 18 children are associated with parental levels and track over time. *Eur J Clin Nutr*  
27 19 2011;**65**(4):463-69.  
28 20  
29 20 41. Harris PA, Taylor R, Thielke R, et al. Research electronic data capture (REDCap)—A  
30 21 metadata-driven methodology and workflow process for providing translational  
31 22 research informatics support. *Journal of Biomedical Informatics* 2009;**42**(2):377-81  
32 23 doi: <https://doi.org/10.1016/j.jbi.2008.08.010>.  
33 24  
34  
35  
36  
37  
38  
39  
40  
41  
42  
43  
44  
45  
46  
47  
48  
49  
50  
51  
52  
53  
54  
55  
56  
57  
58  
59  
60



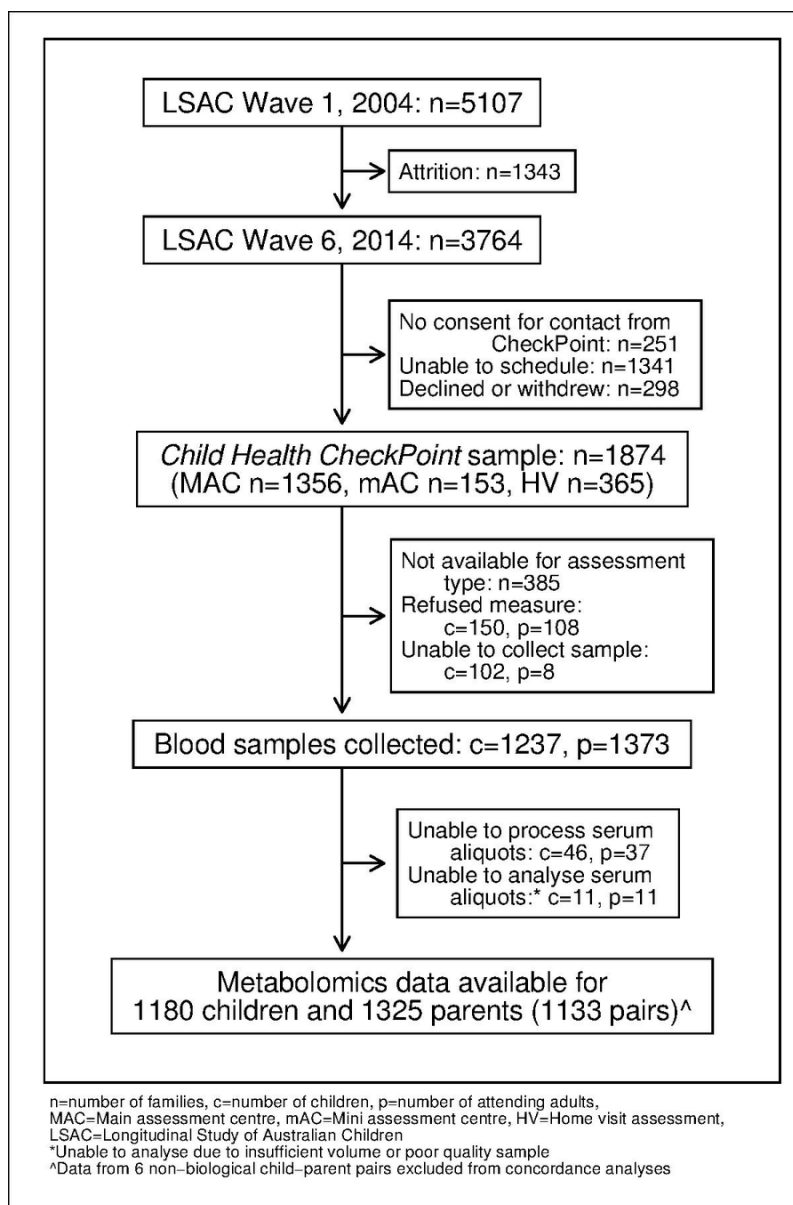

Figure 1: Participant flow chart.

n=number of families, c=number of children, p=number of attending adults,  
MAC=Main assessment centre, mAC=Mini assessment centre, HV=Home visit assessment,  
LSAC=Longitudinal Study of Australian Children

\*Unable to analyse due to insufficient volume or poor quality sample

^Data from 6 non-biological child-parent pairs excluded from concordance analyses

76x114mm (300 x 300 DPI)

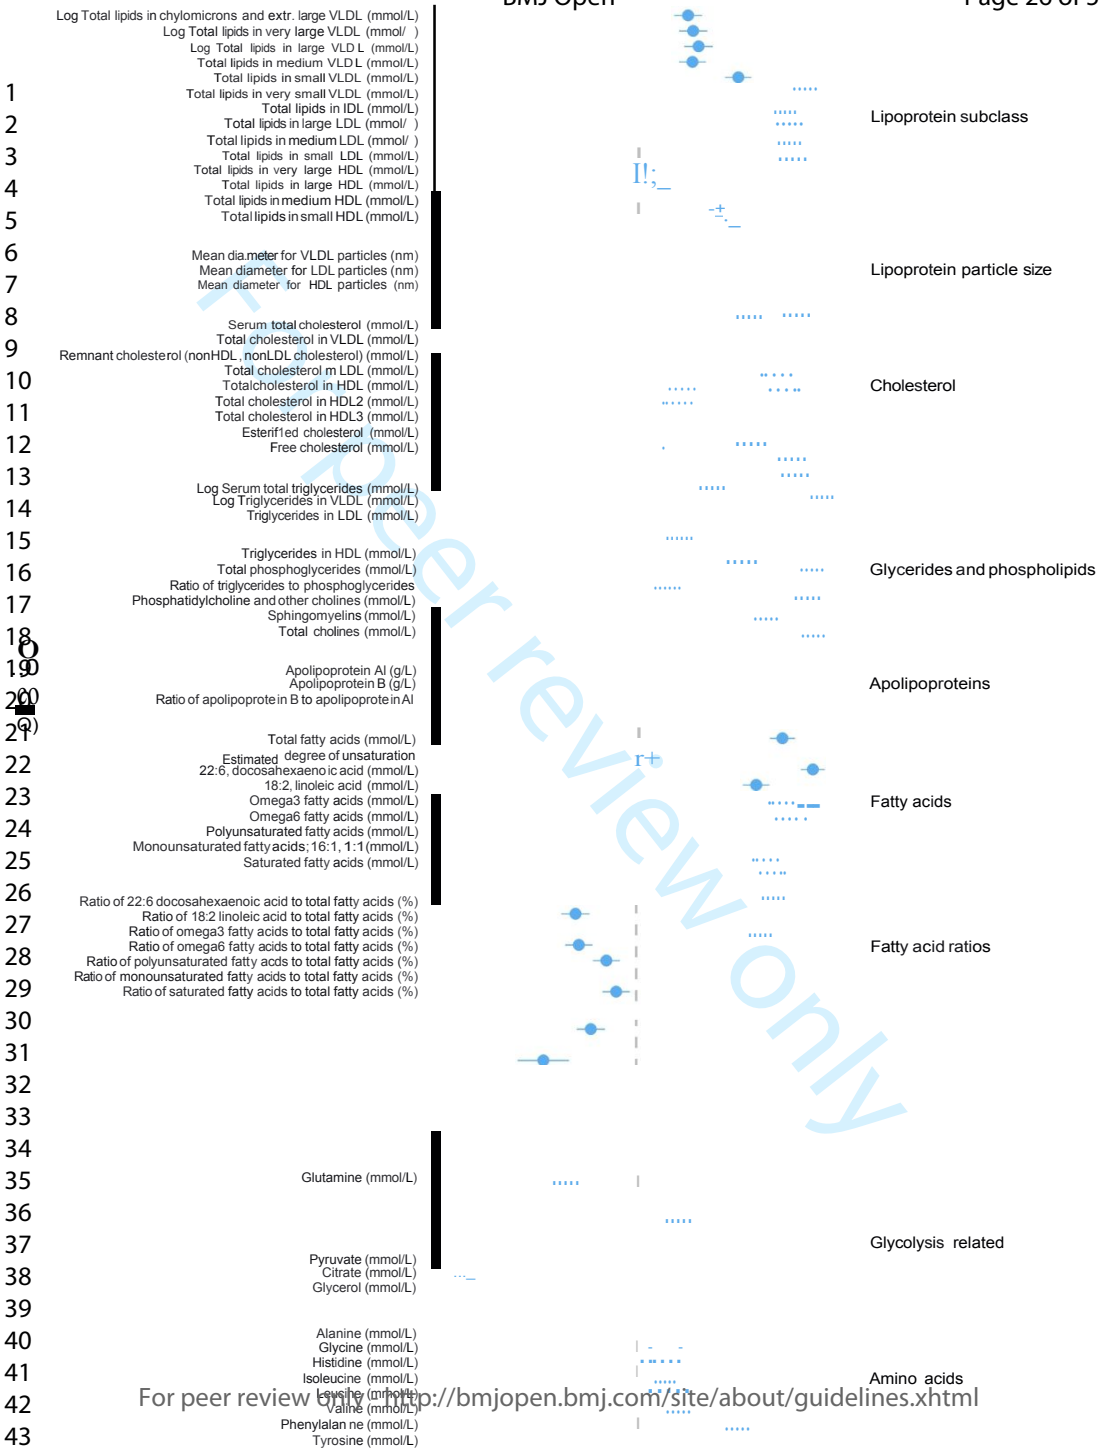

Log Acetate (mmol/L)  
Log Acetoacetate (mmol/L)  
Log 3hydroxybutyrate (mmol/L)

Ketone bodies

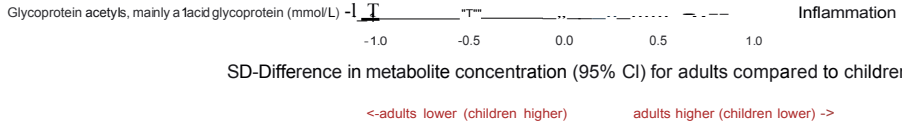

For peer review only

1  
2  
3  
4  
5  
6  
7  
8  
9  
10  
11  
12  
13  
14  
15  
16  
17  
18  
19  
20  
21  
22  
23  
24  
25  
26  
27  
28  
29  
30  
31  
32  
33  
34  
35  
36  
37  
38  
39  
40  
41  
42  
43  
44

A

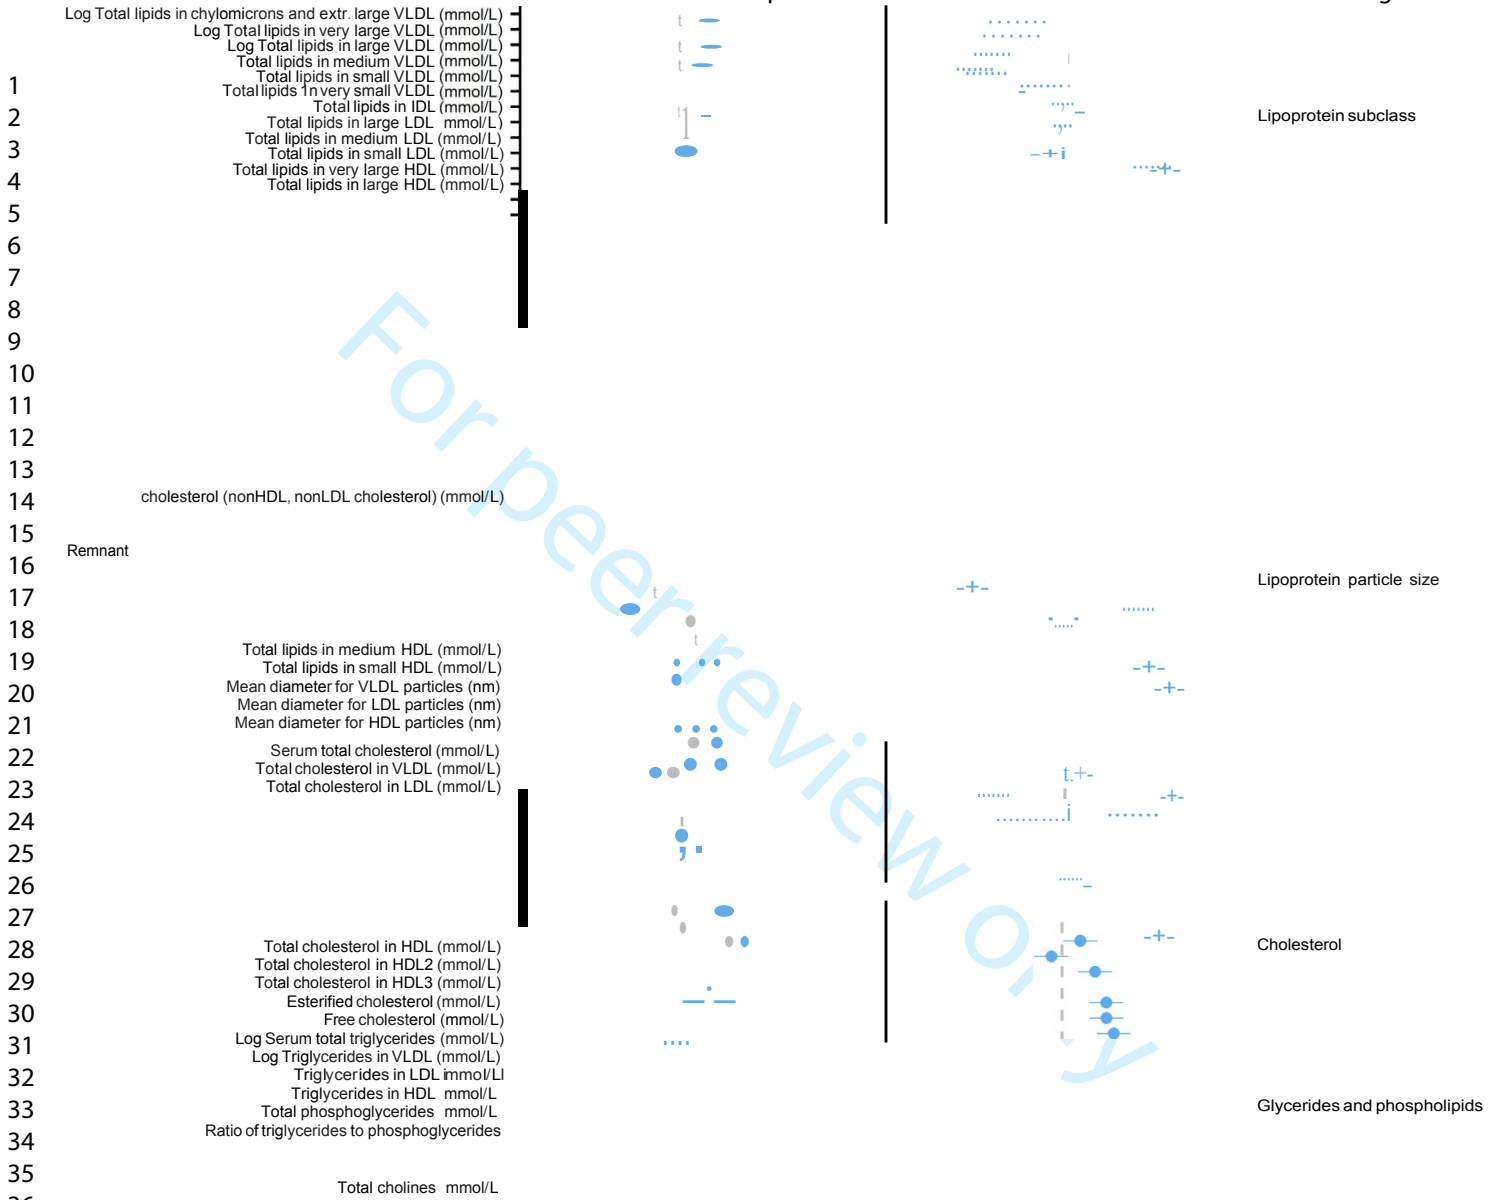

44

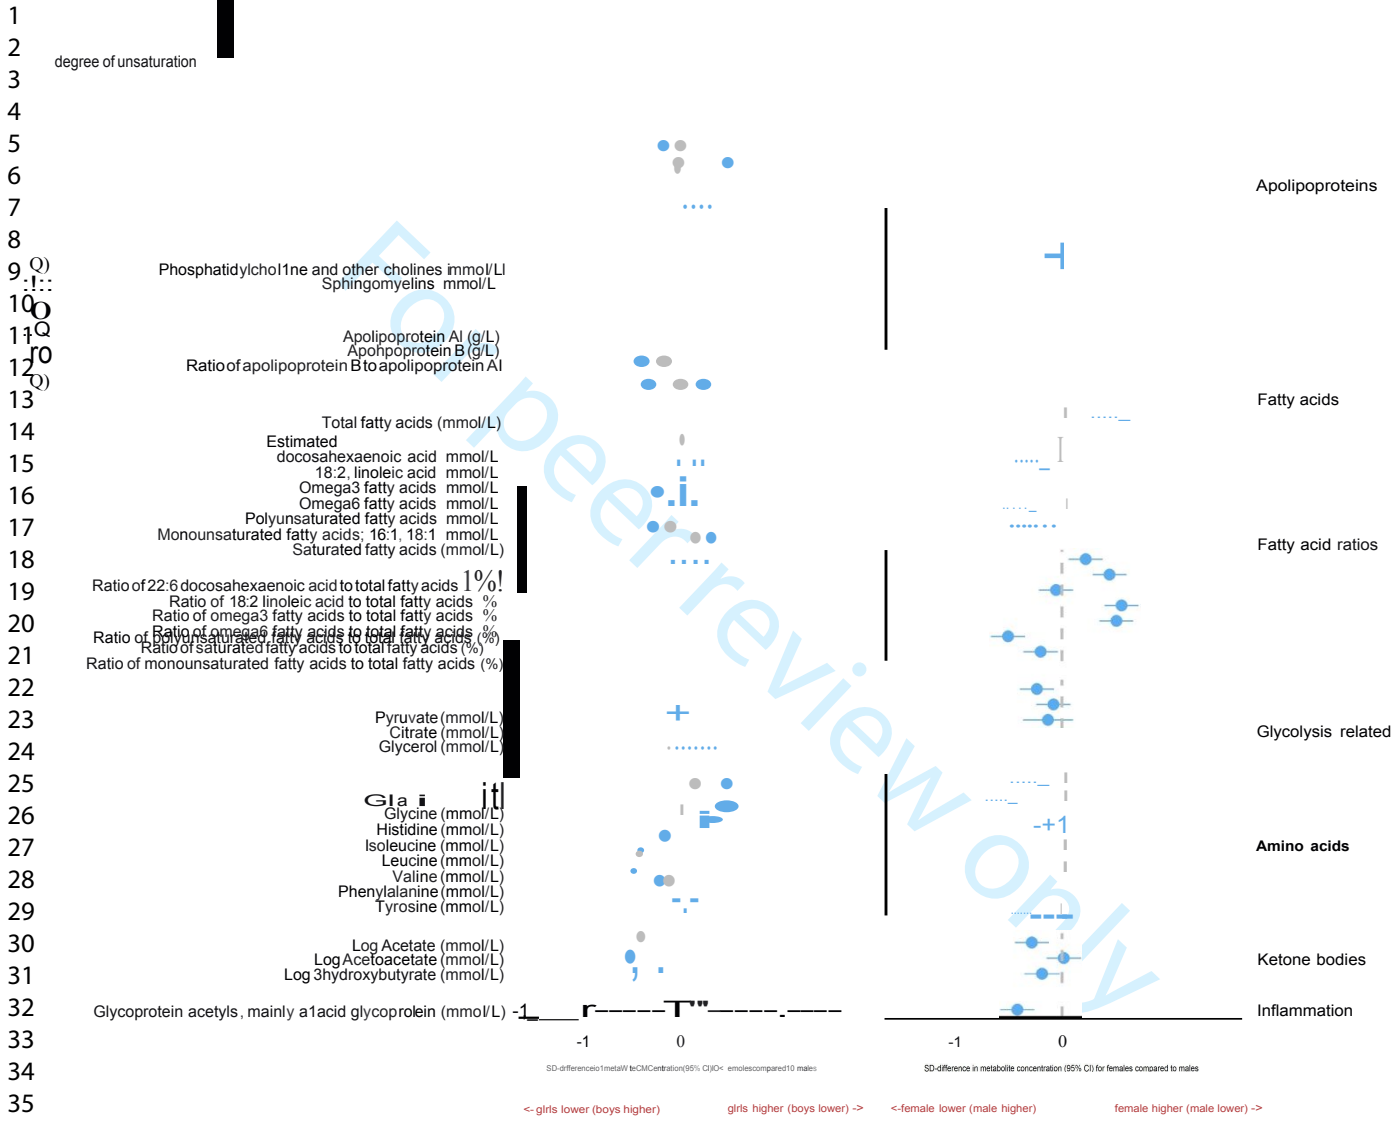

All children with all parents  
BMJ Open

Boys and girls with mothers

Boys  
Girls

- 1 Log Total lipids in chylomicrons & ex. large VLDL (mmol/L)
- 2 Log Total lipids in very large VLDL (mmol/L)
- 3 Log Total lipids in large VLDL (mmol/L)
- 4 Total lipids in medium VLDL (mmol/L)
- 5 Total lipids in small VLDL (mmol/L)
- 6 Total lipids in very small VLDL (mmol/L)
- 7 Total lipids in IDL (mmol/L)
- 8 Total lipids in large LDL (mmol/L)
- 9 Total lipids in medium LDL (mmol/L)
- 10 Total lipids in small LDL (mmol/L)
- 11 Total lipids in very large HDL (mmol/L)
- 12 Total lipids in large HDL (mmol/L)
- 13 Total lipids in medium HDL (mmol/L)
- 14 Total lipids in small HDL (mmol/L)
- 15 Mean diameter for VLDL particles (nm)
- 16 Mean diameter for LDL particles (nm)
- 17 Mean diameter for HDL particles (nm)
- 18
- 19 cholesterol (nonHDL, nonLDL cholesterol) (mmol/L)
- 20 Remnant
- 21 Serum total cholesterol (mmol/L)
- 22 Total cholesterol in VLDL (mmol/L)
- 23 Total cholesterol in LDL (mmol/L)
- 24 Total cholesterol in HDL (mmol/L)
- 25 Total cholesterol in HDL2 (mmol/L)
- 26 Total cholesterol in HDL3 (mmol/L)
- 27 Esterified cholesterol (mmol/L)
- 28 Free cholesterol (mmol/L)
- 29 Log Serum total triglycerides (mmol/L)
- 30 Log Triglycerides in VLDL (mmol/L)
- 31 Triglycerides in LDL (mmol/L)
- 32 Triglycerides in HDL (mmol/L)
- 33 Total phosphoglycerides (mmol/L)
- 34 Ratio of triglycerides to phosphoglycerides
- 35 Phosphatidylcholine & other cholines (mmol/L)
- 36 Sphingomyelins (mmol/L)
- 37 Total cholines (mmol/L)
- 38
- 39 Apolipoprotein A1 (g/L)
- 40 Apolipoprotein B (g/L)
- 41 Bto apolipoprotein AI
- 42
- 43
- 44
- 45
- 46
- 47
- 48
- 49
- 50
- 51
- 52
- 53
- 54
- 55
- 56
- 57
- 58
- 59
- 60
- 61
- 62
- 63
- 64
- 65
- 66
- 67
- 68
- 69
- 70
- 71
- 72
- 73
- 74
- 75
- 76
- 77
- 78
- 79
- 80
- 81
- 82
- 83
- 84
- 85
- 86
- 87
- 88
- 89
- 90
- 91
- 92
- 93
- 94
- 95
- 96
- 97
- 98
- 99
- 100
- 101
- 102
- 103
- 104
- 105
- 106
- 107
- 108
- 109
- 110
- 111
- 112
- 113
- 114
- 115
- 116
- 117
- 118
- 119
- 120
- 121
- 122
- 123
- 124
- 125
- 126
- 127
- 128
- 129
- 130
- 131
- 132
- 133
- 134
- 135
- 136
- 137
- 138
- 139
- 140
- 141
- 142
- 143
- 144
- 145
- 146
- 147
- 148
- 149
- 150
- 151
- 152
- 153
- 154
- 155
- 156
- 157
- 158
- 159
- 160
- 161
- 162
- 163
- 164
- 165
- 166
- 167
- 168
- 169
- 170
- 171
- 172
- 173
- 174
- 175
- 176
- 177
- 178
- 179
- 180
- 181
- 182
- 183
- 184
- 185
- 186
- 187
- 188
- 189
- 190
- 191
- 192
- 193
- 194
- 195
- 196
- 197
- 198
- 199
- 200
- 201
- 202
- 203
- 204
- 205
- 206
- 207
- 208
- 209
- 210
- 211
- 212
- 213
- 214
- 215
- 216
- 217
- 218
- 219
- 220
- 221
- 222
- 223
- 224
- 225
- 226
- 227
- 228
- 229
- 230
- 231
- 232
- 233
- 234
- 235
- 236
- 237
- 238
- 239
- 240
- 241
- 242
- 243
- 244
- 245
- 246
- 247
- 248
- 249
- 250
- 251
- 252
- 253
- 254
- 255
- 256
- 257
- 258
- 259
- 260
- 261
- 262
- 263
- 264
- 265
- 266
- 267
- 268
- 269
- 270
- 271
- 272
- 273
- 274
- 275
- 276
- 277
- 278
- 279
- 280
- 281
- 282
- 283
- 284
- 285
- 286
- 287
- 288
- 289
- 290
- 291
- 292
- 293
- 294
- 295
- 296
- 297
- 298
- 299
- 300
- 301
- 302
- 303
- 304
- 305
- 306
- 307
- 308
- 309
- 310
- 311
- 312
- 313
- 314
- 315
- 316
- 317
- 318
- 319
- 320
- 321
- 322
- 323
- 324
- 325
- 326
- 327
- 328
- 329
- 330
- 331
- 332
- 333
- 334
- 335
- 336
- 337
- 338
- 339
- 340
- 341
- 342
- 343
- 344
- 345
- 346
- 347
- 348
- 349
- 350
- 351
- 352
- 353
- 354
- 355
- 356
- 357
- 358
- 359
- 360
- 361
- 362
- 363
- 364
- 365
- 366
- 367
- 368
- 369
- 370
- 371
- 372
- 373
- 374
- 375
- 376
- 377
- 378
- 379
- 380
- 381
- 382
- 383
- 384
- 385
- 386
- 387
- 388
- 389
- 390
- 391
- 392
- 393
- 394
- 395
- 396
- 397
- 398
- 399
- 400
- 401
- 402
- 403
- 404
- 405
- 406
- 407
- 408
- 409
- 410
- 411
- 412
- 413
- 414
- 415
- 416
- 417
- 418
- 419
- 420
- 421
- 422
- 423
- 424
- 425
- 426
- 427
- 428
- 429
- 430
- 431
- 432
- 433
- 434
- 435
- 436
- 437
- 438
- 439
- 440
- 441
- 442
- 443
- 444
- 445
- 446
- 447
- 448
- 449
- 450
- 451
- 452
- 453
- 454
- 455
- 456
- 457
- 458
- 459
- 460
- 461
- 462
- 463
- 464
- 465
- 466
- 467
- 468
- 469
- 470
- 471
- 472
- 473
- 474
- 475
- 476
- 477
- 478
- 479
- 480
- 481
- 482
- 483
- 484
- 485
- 486
- 487
- 488
- 489
- 490
- 491
- 492
- 493
- 494
- 495
- 496
- 497
- 498
- 499
- 500

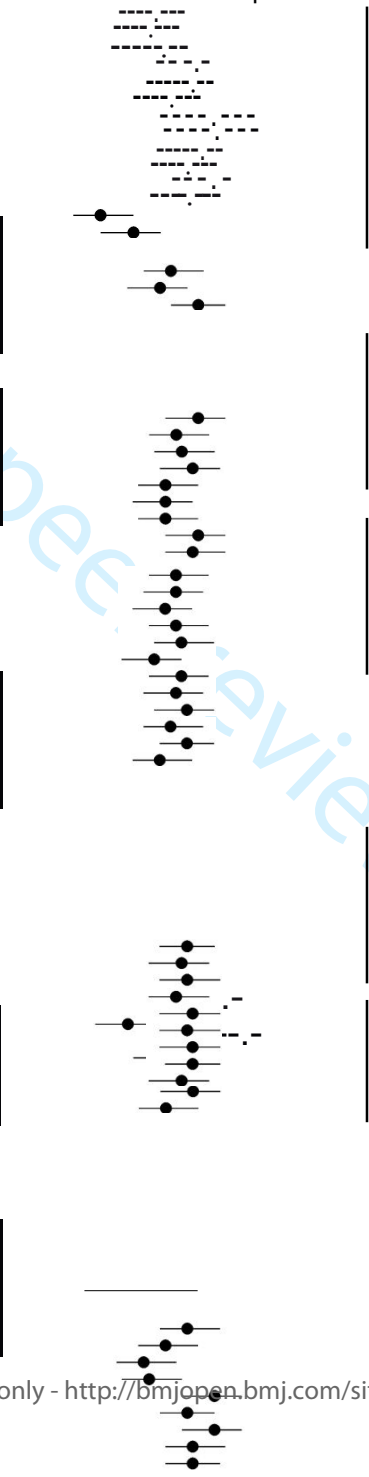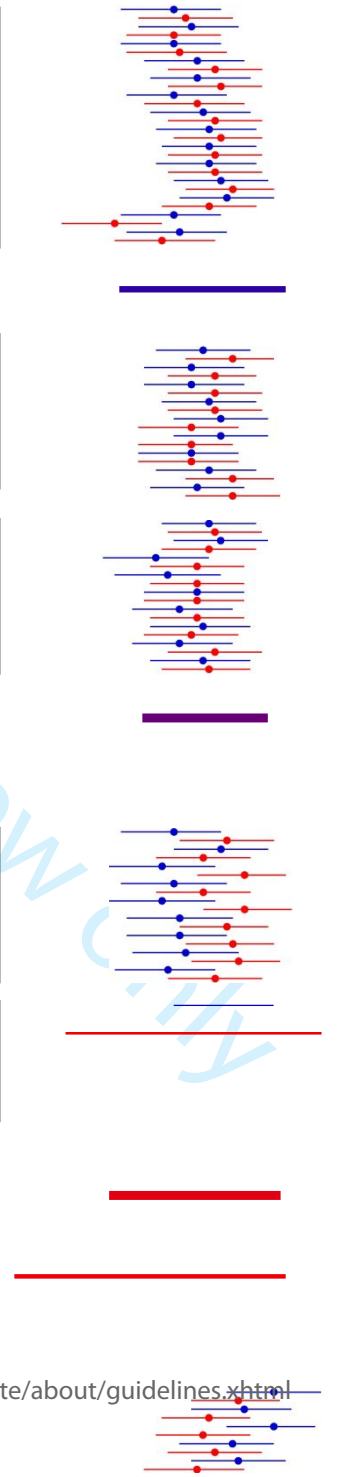

Lipoprotein subclass lipids

Lipoprotein particle size

Cholesterol

Glycerides and

phospholipids Apolipoproteins

Fatty acids

Fatty acid ratios

Glycolysis related

Amino acids

Log Acetate (mmol/L)  
Log Acetoacetate (mmol/L)  
Log 3hydroxybutyrate (mmol/L)

Ketone bodies

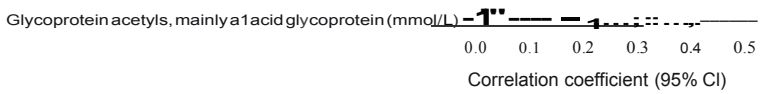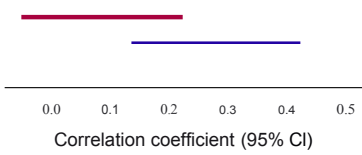

For peer review only



# Supplementary Figure 1: Correlations between Child Health CheckPoint metabolites - children

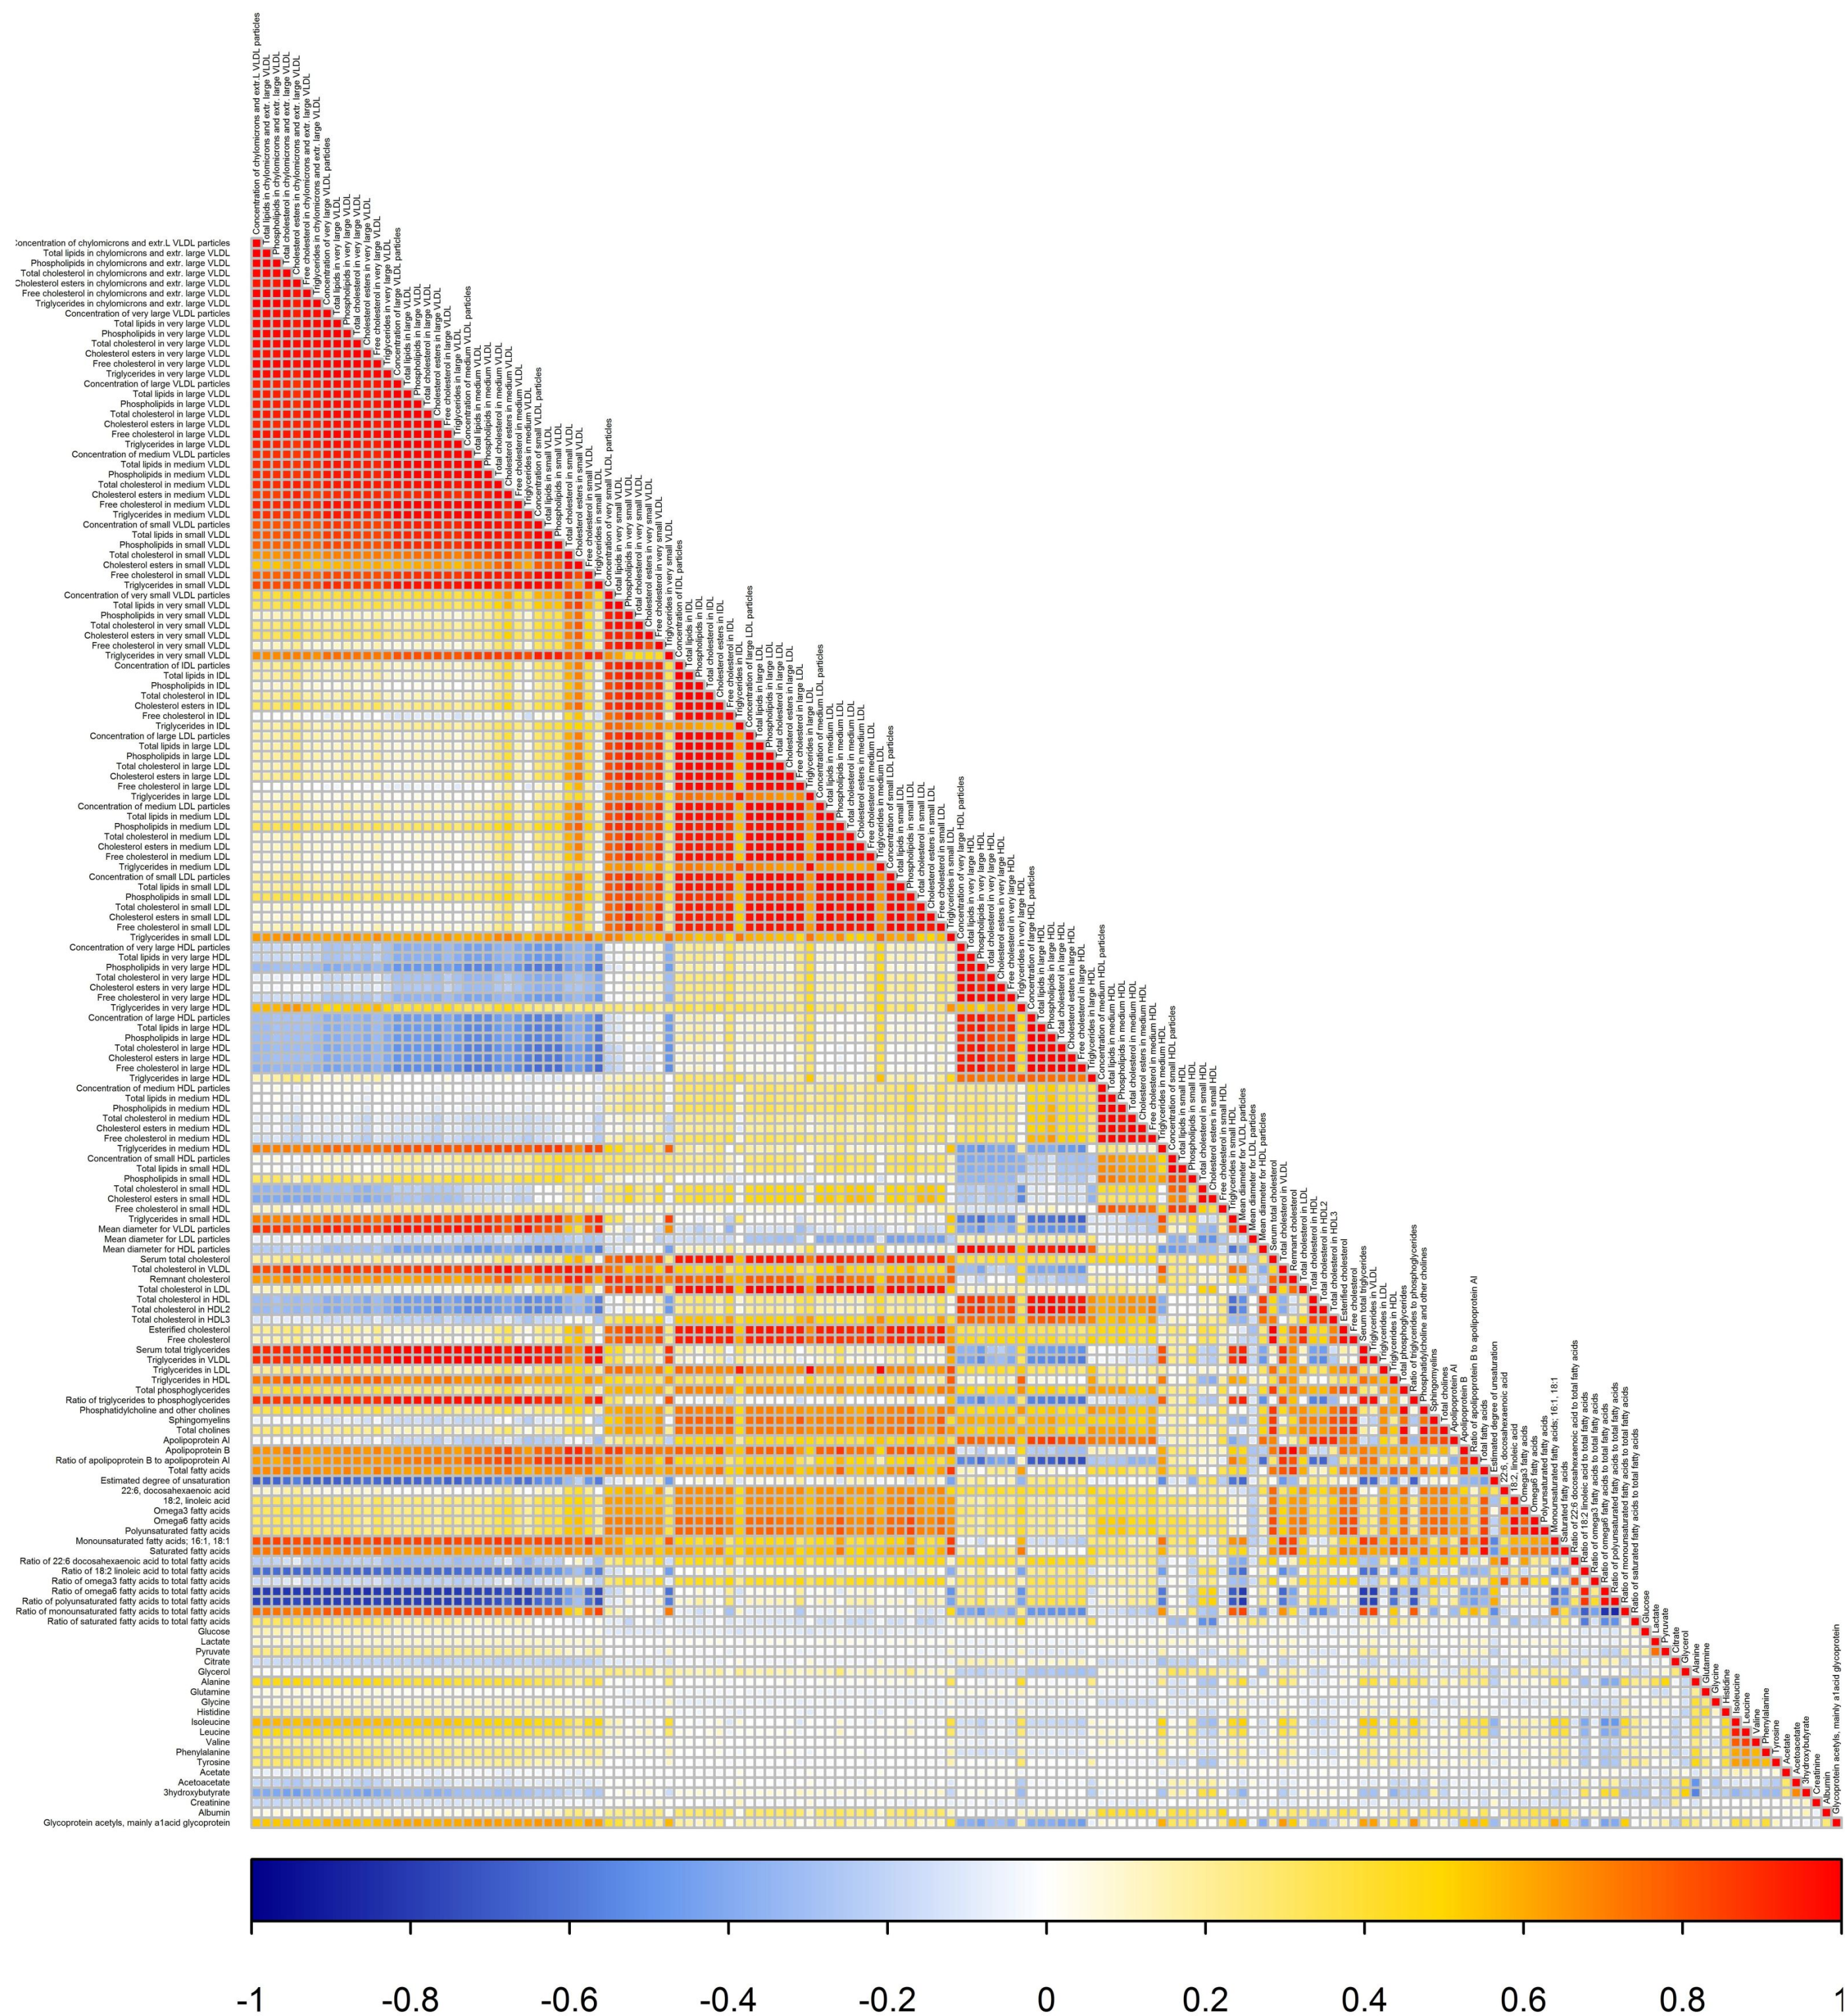

Note: Correlations (spearman) between metabolites for the CheckPoint child metabolomics data



## Supplementary Figure 2: Correlations between Child Health CheckPoint metabolites - parents

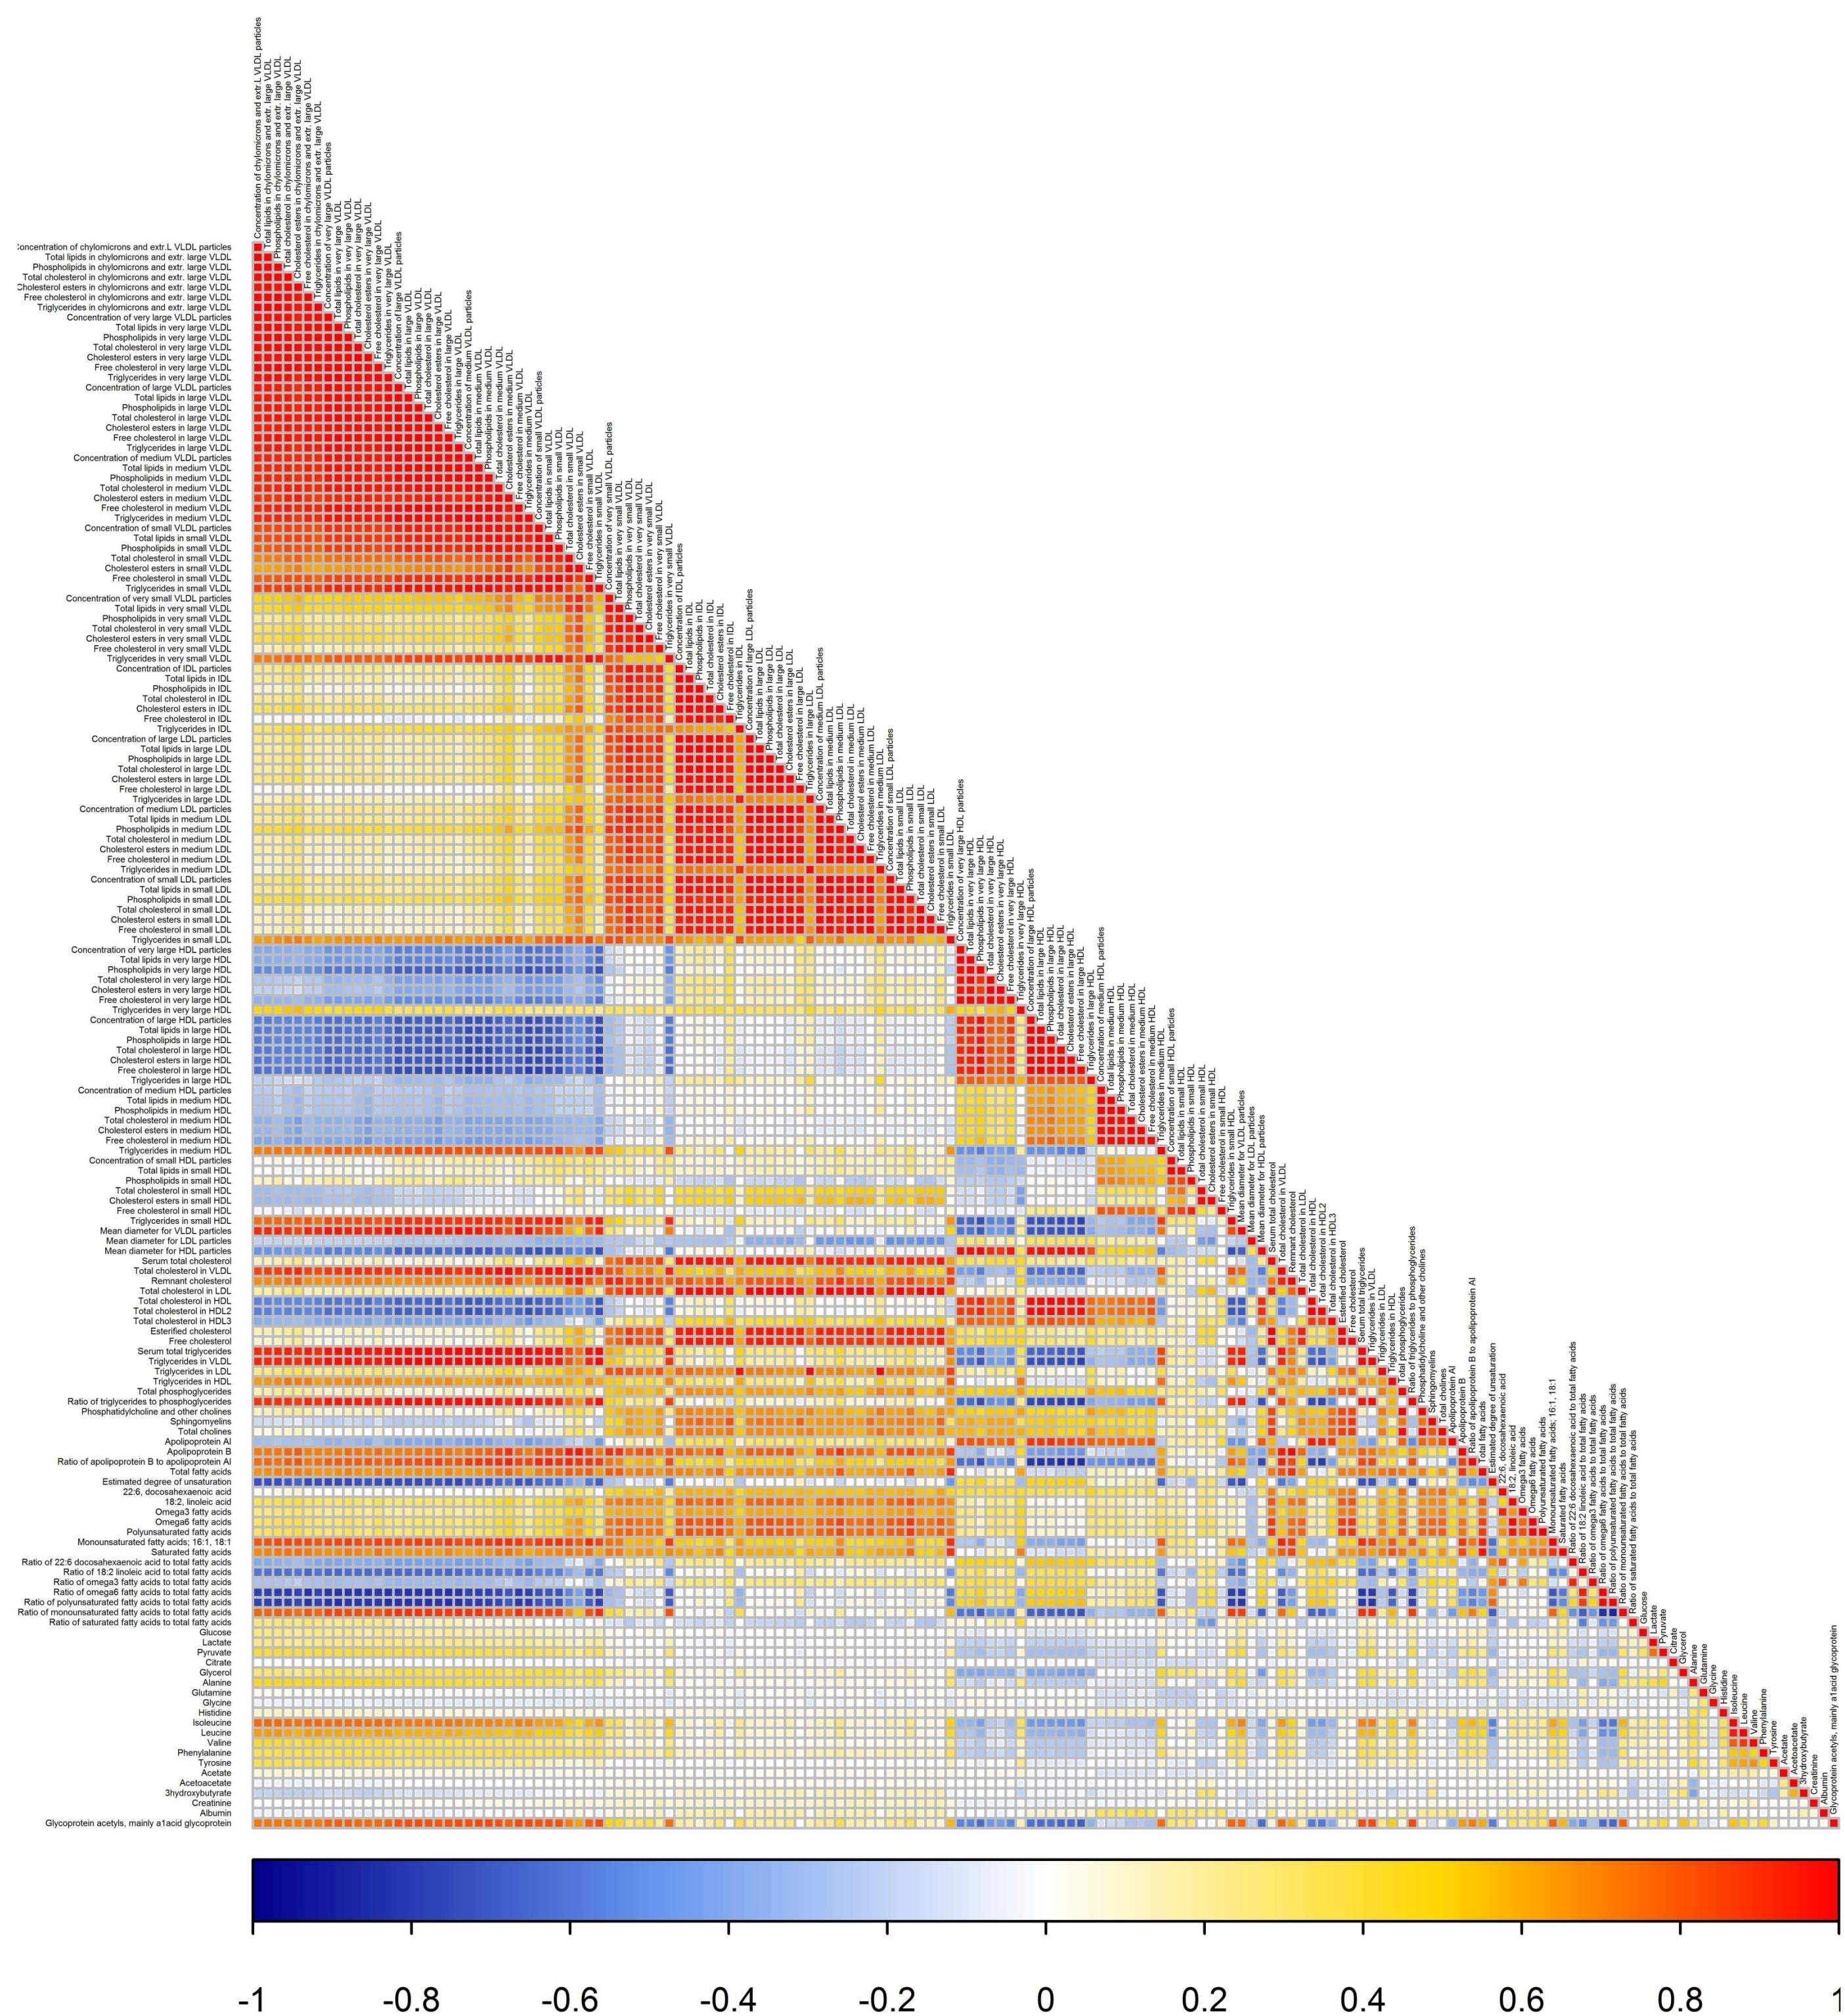

Note: Correlations (spearman) between metabolites for the CheckPoint parent metabolomics data



1  
2  
3  
4  
5  
6  
7  
8  
9  
10  
11  
12  
13  
14  
15  
16  
17  
18  
19  
20  
21  
22  
23  
24  
25  
26  
27  
28  
29  
30  
31  
32  
33  
34  
35  
36  
37  
38  
39  
40  
41  
42  
43  
44  
45  
46  
47  
48  
49  
50  
51  
52  
53  
54  
55  
56  
57  
58  
59  
60

For peer review only

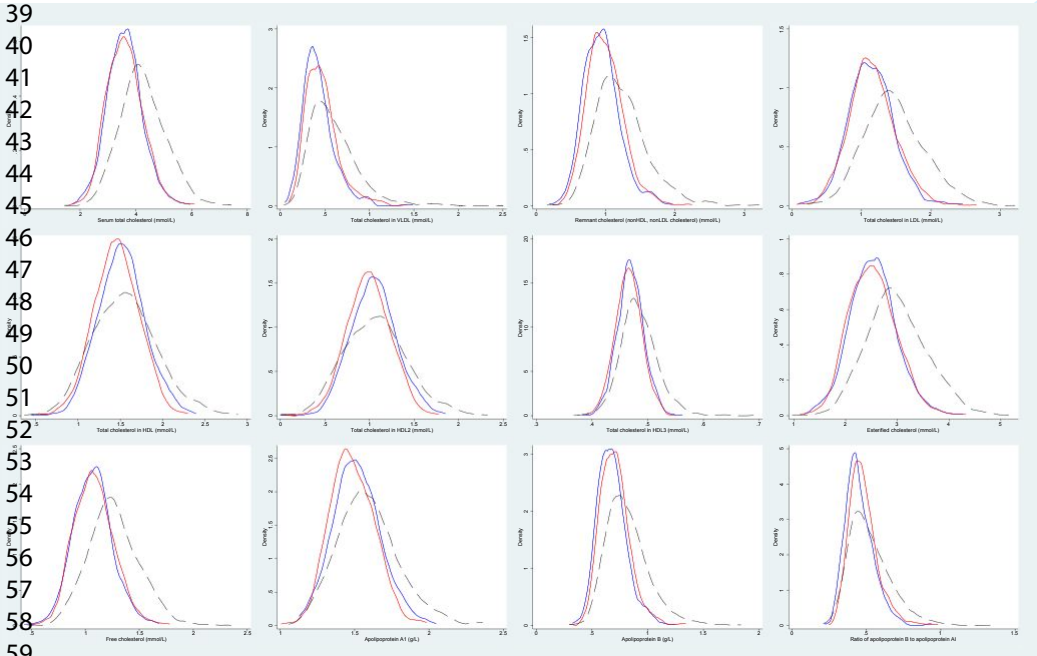

— Boys  
— Girls  
- - - All parents

1  
2  
3  
4  
5  
6  
7  
8  
9  
10  
11  
12  
13  
14  
15  
16  
17  
18  
19  
20  
21  
22  
23  
24  
25  
26  
27  
28  
29  
30  
31  
32  
33  
34  
35  
36  
37  
38  
39  
40  
41  
42  
43  
44  
45  
46  
47  
48  
49  
50  
51  
52  
53  
54  
55  
56  
57  
58  
59  
60

For peer review only

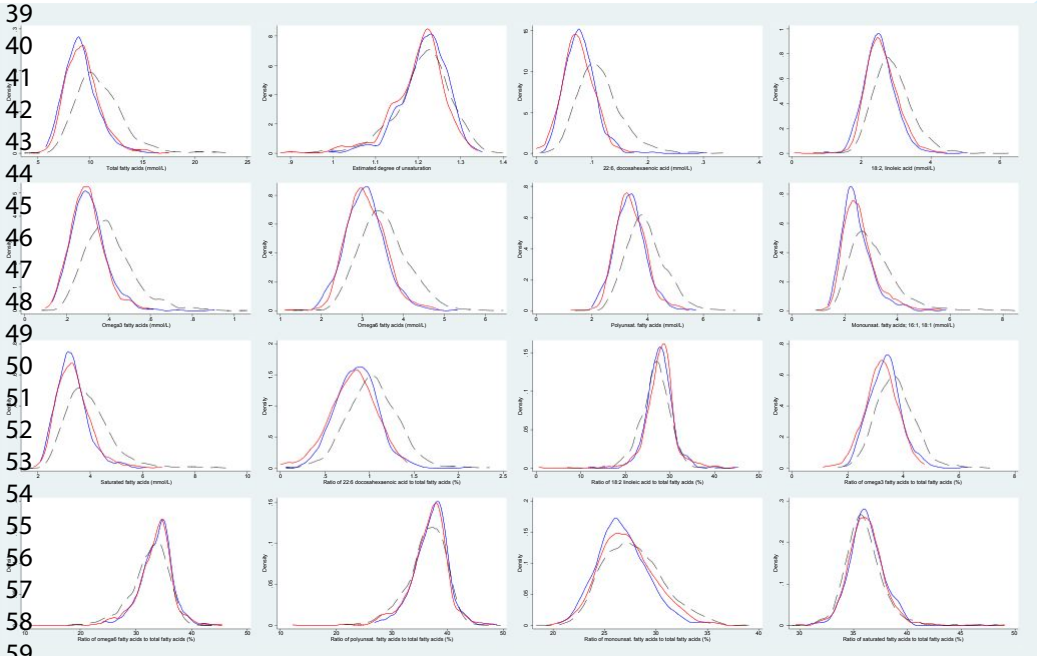

— Boys  
- - - Girls  
· · · All parents

1  
2  
3  
4  
5  
6  
7  
8  
9  
10  
11  
12  
13  
14  
15  
16  
17  
18  
19  
20  
21  
22  
23  
24  
25  
26  
27  
28  
29  
30  
31  
32  
33  
34  
35  
36  
37  
38  
39  
40  
41  
42  
43  
44  
45  
46  
47  
48  
49  
50  
51  
52  
53  
54  
55  
56  
57  
58  
59  
60

For peer review only

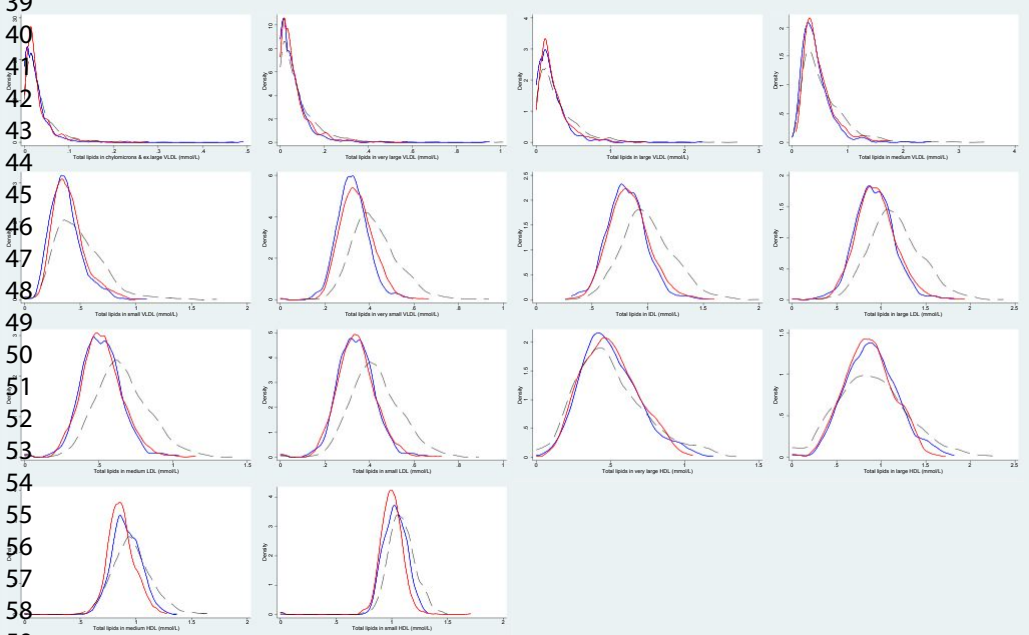

— Boys  
- - - Girls  
. . . All parents

1  
2  
3  
4  
5  
6  
7  
8  
9  
10  
11  
12  
13  
14  
15  
16  
17  
18  
19  
20  
21  
22  
23  
24  
25  
26  
27  
28  
29  
30  
31  
32  
33  
34  
35  
36  
37  
38  
39  
40  
41  
42  
43  
44  
45  
46  
47  
48  
49  
50  
51  
52  
53  
54  
55  
56  
57  
58  
59  
60

For peer review only

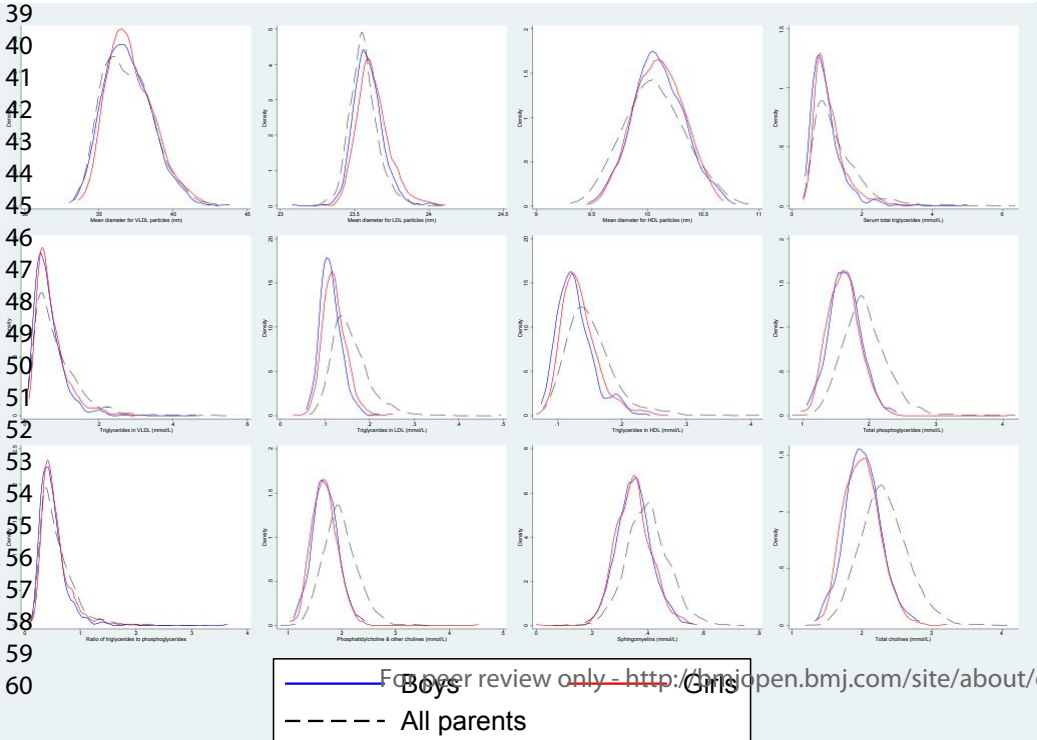

1  
2  
3  
4  
5  
6  
7  
8  
9  
10  
11  
12  
13  
14  
15  
16  
17  
18  
19  
20  
21  
22  
23  
24  
25  
26  
27  
28  
29  
30  
31  
32  
33  
34  
35  
36  
37  
38  
39  
40  
41  
42  
43  
44  
45  
46  
47  
48  
49  
50  
51  
52  
53  
54  
55  
56  
57  
58  
59  
60

For peer review only

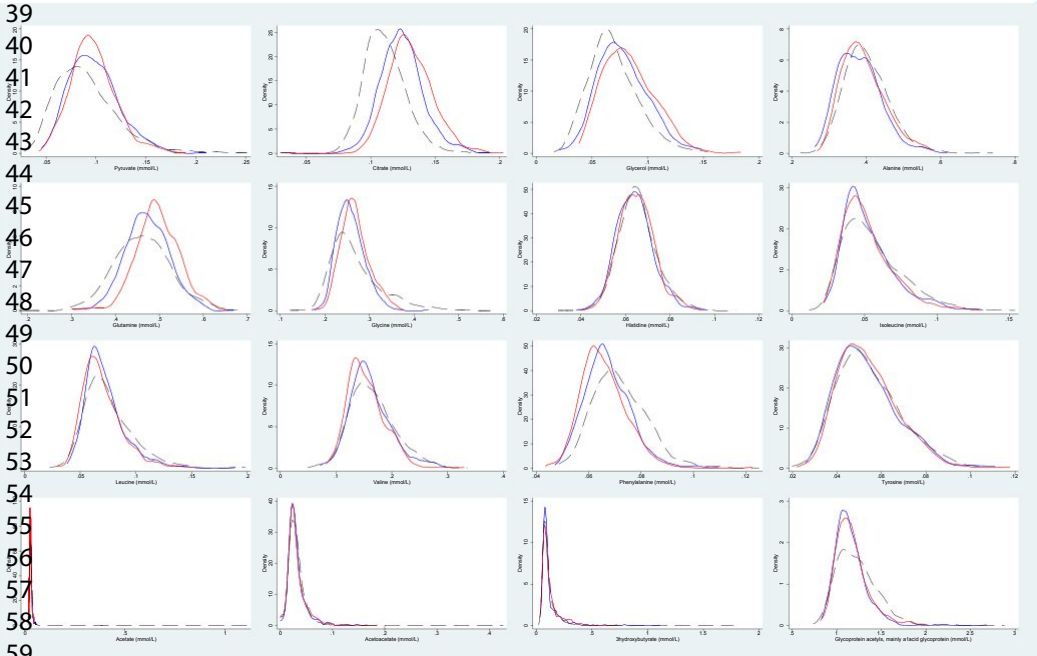

— Boys  
— Girls  
- - - All parents

Supplementary table 1: Weighted mean (SD)\* of metabolite measures in children and parents.

| Metabolic subgroup                                        | Children |       |      |       |       |       |      |       |       | Adults |       |      |        |       |      |      |       |      |
|-----------------------------------------------------------|----------|-------|------|-------|-------|-------|------|-------|-------|--------|-------|------|--------|-------|------|------|-------|------|
|                                                           | Boys     |       |      | Girls |       |       | All  |       |       | Male   |       |      | Female |       |      | All  |       |      |
|                                                           | n        | Mean  | SD   | n     | Mean  | SD    | n    | Mean  | SD    | n      | Mean  | SD   | n      | Mean  | SD   | n    | Mean  | SD   |
| <b>Lipoprotein subclass lipids</b>                        |          |       |      |       |       |       |      |       |       |        |       |      |        |       |      |      |       |      |
| Total lipids in chylomicrons & ex.large VLDL (mmol/L)*    | 575      | 0.005 | 0.60 | 605   | 0.011 | 0.54  | 1180 | 0.007 | 0.58  | 177    | 0.040 | 0.53 | 1148   | 0.013 | 0.51 | 1325 | 0.015 | 0.52 |
| Total lipids in very large VLDL (mmol/L)*                 | 575      | 0.006 | 0.73 | 605   | 0.014 | 0.74  | 1180 | 0.010 | 0.74  | 177    | 0.087 | 0.79 | 1148   | 0.022 | 0.67 | 1325 | 0.027 | 0.70 |
| Total lipids in large VLDL (mmol/L)*                      | 575      | 0.059 | 0.99 | 605   | 0.121 | 0.93  | 1180 | 0.085 | 0.99  | 177    | 0.423 | 1.13 | 1148   | 0.161 | 0.73 | 1325 | 0.182 | 0.78 |
| Total lipids in medium VLDL (mmol/L)                      | 575      | 0.44  | 0.27 | 605   | 0.48  | 0.27  | 1180 | 0.46  | 0.27  | 177    | 0.96  | 0.63 | 1148   | 0.55  | 0.37 | 1325 | 0.60  | 0.43 |
| Total lipids in small VLDL (mmol/L)                       | 575      | 0.38  | 0.15 | 605   | 0.40  | 0.15  | 1180 | 0.39  | 0.15  | 177    | 0.69  | 0.28 | 1148   | 0.49  | 0.22 | 1325 | 0.52  | 0.23 |
| Total lipids in very small VLDL (mmol/L)                  | 575      | 0.32  | 0.07 | 605   | 0.34  | 0.08  | 1180 | 0.33  | 0.07  | 177    | 0.45  | 0.11 | 1148   | 0.43  | 0.11 | 1325 | 0.43  | 0.11 |
| Total lipids in IDL (mmol/L)                              | 575      | 0.80  | 0.18 | 605   | 0.83  | 0.18  | 1180 | 0.82  | 0.18  | 177    | 0.98  | 0.26 | 1148   | 1.00  | 0.24 | 1325 | 1.00  | 0.24 |
| Total lipids in large LDL (mmol/L)                        | 575      | 0.92  | 0.22 | 605   | 0.94  | 0.23  | 1180 | 0.93  | 0.22  | 177    | 1.16  | 0.33 | 1148   | 1.15  | 0.30 | 1325 | 1.16  | 0.30 |
| Total lipids in medium LDL (mmol/L)                       | 575      | 0.51  | 0.14 | 605   | 0.52  | 0.14  | 1180 | 0.52  | 0.14  | 177    | 0.68  | 0.21 | 1148   | 0.66  | 0.18 | 1325 | 0.66  | 0.19 |
| Total lipids in small LDL (mmol/L)                        | 575      | 0.34  | 0.08 | 605   | 0.34  | 0.09  | 1180 | 0.34  | 0.08  | 177    | 0.44  | 0.14 | 1148   | 0.42  | 0.11 | 1325 | 0.43  | 0.12 |
| Total lipids in very large HDL (mmol/L)                   | 575      | 0.48  | 0.20 | 605   | 0.49  | 0.18  | 1180 | 0.49  | 0.19  | 177    | 0.32  | 0.19 | 1148   | 0.50  | 0.23 | 1325 | 0.47  | 0.23 |
| Total lipids in large HDL (mmol/L)                        | 575      | 0.87  | 0.29 | 605   | 0.86  | 0.27  | 1180 | 0.87  | 0.28  | 177    | 0.51  | 0.34 | 1148   | 0.90  | 0.38 | 1325 | 0.85  | 0.40 |
| Total lipids in medium HDL (mmol/L)                       | 575      | 0.92  | 0.13 | 605   | 0.87  | 0.13  | 1180 | 0.89  | 0.13  | 177    | 0.83  | 0.24 | 1148   | 0.97  | 0.18 | 1325 | 0.95  | 0.19 |
| Total lipids in small HDL (mmol/L)                        | 575      | 1.04  | 0.10 | 605   | 1.00  | 0.11  | 1180 | 1.02  | 0.11  | 177    | 1.06  | 0.25 | 1148   | 1.08  | 0.14 | 1325 | 1.08  | 0.16 |
| <b>Lipoprotein particle size</b>                          |          |       |      |       |       |       |      |       |       |        |       |      |        |       |      |      |       |      |
| Mean diameter for VLDL particles (nm)                     | 575      | 37.06 | 1.63 | 605   | 37.24 | 1.56  | 1180 | 37.15 | 1.59  | 177    | 38.53 | 1.74 | 1148   | 36.94 | 1.60 | 1325 | 37.15 | 1.70 |
| Mean diameter for LDL particles (nm)                      | 575      | 23.59 | 0.10 | 605   | 23.63 | 0.11  | 1180 | 23.61 | 0.11  | 177    | 23.49 | 0.09 | 1148   | 23.57 | 0.10 | 1325 | 23.56 | 0.10 |
| Mean diameter for HDL particles (nm)                      | 575      | 10.08 | 0.23 | 605   | 10.10 | 0.22  | 1180 | 10.09 | 0.23  | 177    | 9.80  | 0.24 | 1148   | 10.07 | 0.26 | 1325 | 10.03 | 0.28 |
| <b>Cholesterol</b>                                        |          |       |      |       |       |       |      |       |       |        |       |      |        |       |      |      |       |      |
| Serum total cholesterol (mmol/L)                          | 575      | 3.58  | 0.62 | 605   | 3.60  | 0.64  | 1180 | 3.59  | 0.63  | 177    | 4.16  | 0.88 | 1148   | 4.23  | 0.83 | 1325 | 4.22  | 0.83 |
| Total cholesterol in VLDL (mmol/L)                        | 575      | 0.44  | 0.19 | 605   | 0.47  | 0.19  | 1180 | 0.46  | 0.19  | 177    | 0.83  | 0.40 | 1148   | 0.59  | 0.26 | 1325 | 0.62  | 0.30 |
| Remnant cholesterol (nonHDL, nonLDL cholesterol) (mmol/L) | 575      | 0.94  | 0.27 | 605   | 0.99  | 0.27  | 1180 | 0.97  | 0.27  | 177    | 1.45  | 0.47 | 1148   | 1.22  | 0.38 | 1325 | 1.25  | 0.40 |
| Total cholesterol in LDL (mmol/L)                         | 575      | 1.13  | 0.33 | 605   | 1.15  | 0.34  | 1180 | 1.14  | 0.33  | 177    | 1.49  | 0.50 | 1148   | 1.46  | 0.44 | 1325 | 1.46  | 0.45 |
| Total cholesterol in HDL (mmol/L)                         | 575      | 1.50  | 0.27 | 605   | 1.45  | 0.27  | 1180 | 1.48  | 0.27  | 177    | 1.22  | 0.35 | 1148   | 1.56  | 0.36 | 1325 | 1.51  | 0.38 |
| Total cholesterol in HDL2 (mmol/L)                        | 575      | 1.03  | 0.25 | 605   | 0.99  | 0.25  | 1180 | 1.01  | 0.25  | 177    | 0.75  | 0.33 | 1148   | 1.07  | 0.34 | 1325 | 1.03  | 0.35 |
| Total cholesterol in HDL3 (mmol/L)                        | 575      | 0.47  | 0.02 | 605   | 0.47  | 0.02  | 1180 | 0.47  | 0.02  | 177    | 0.47  | 0.03 | 1148   | 0.48  | 0.03 | 1325 | 0.48  | 0.03 |
| Esterified cholesterol (mmol/L)                           | 572      | 2.52  | 0.45 | 604   | 2.52  | 0.46  | 1176 | 2.52  | 0.45  | 176    | 2.94  | 0.64 | 1147   | 2.98  | 0.59 | 1323 | 2.97  | 0.60 |
| Free cholesterol (mmol/L)                                 | 572      | 1.06  | 0.18 | 604   | 1.08  | 0.19  | 1176 | 1.07  | 0.18  | 176    | 1.21  | 0.27 | 1147   | 1.26  | 0.24 | 1323 | 1.25  | 0.24 |
| <b>Glycerides and phospholipids</b>                       |          |       |      |       |       |       |      |       |       |        |       |      |        |       |      |      |       |      |
| Serum total triglycerides (mmol/L)*                       | 575      | 0.918 | 4.77 | 605   | 1.005 | 74.68 | 1180 | 0.962 | 10.07 | 177    | 1.686 | 0.96 | 1148   | 1.129 | 3.73 | 1325 | 1.19  | 2.75 |
| Triglycerides in VLDL (mmol/L)*                           | 575      | 0.582 | 1.07 | 605   | 0.648 | 1.21  | 1180 | 0.615 | 1.13  | 177    | 1.249 | 2.80 | 1148   | 0.694 | 1.75 | 1325 | 0.75  | 2.31 |
| Triglycerides in LDL (mmol/L)                             | 575      | 0.11  | 0.02 | 605   | 0.12  | 0.03  | 1180 | 0.12  | 0.03  | 177    | 0.15  | 0.04 | 1148   | 0.16  | 0.04 | 1325 | 0.16  | 0.04 |
| Triglycerides in HDL (mmol/L)                             | 575      | 0.13  | 0.03 | 605   | 0.14  | 0.03  | 1180 | 0.13  | 0.03  | 177    | 0.16  | 0.05 | 1148   | 0.15  | 0.04 | 1325 | 0.15  | 0.04 |
| Total phosphoglycerides (mmol/L)                          | 572      | 1.63  | 0.24 | 604   | 1.62  | 0.26  | 1176 | 1.63  | 0.25  | 176    | 1.86  | 0.35 | 1147   | 1.93  | 0.34 | 1323 | 1.92  | 0.34 |
| Ratio of triglycerides to phosphoglycerides               | 572      | 0.53  | 0.25 | 604   | 0.57  | 0.28  | 1176 | 0.55  | 0.27  | 176    | 0.95  | 0.59 | 1147   | 0.58  | 0.28 | 1323 | 0.63  | 0.36 |
| Phosphatidylcholine & other cholines (mmol/L)             | 572      | 1.69  | 0.24 | 604   | 1.69  | 0.27  | 1176 | 1.69  | 0.25  | 175    | 1.88  | 0.32 | 1147   | 1.98  | 0.34 | 1322 | 1.97  | 0.33 |
| Sphingomyelins (mmol/L)                                   | 572      | 0.35  | 0.06 | 604   | 0.35  | 0.06  | 1176 | 0.35  | 0.06  | 175    | 0.37  | 0.07 | 1147   | 0.40  | 0.08 | 1322 | 0.39  | 0.08 |
| Total cholines (mmol/L)                                   | 572      | 2.01  | 0.26 | 604   | 2.00  | 0.26  | 1176 | 2.00  | 0.26  | 175    | 2.19  | 0.33 | 1147   | 2.32  | 0.35 | 1322 | 2.30  | 0.35 |
| <b>Apolipoproteins</b>                                    |          |       |      |       |       |       |      |       |       |        |       |      |        |       |      |      |       |      |
| Apolipoprotein A1 (g/L)                                   | 575      | 1.51  | 0.16 | 605   | 1.48  | 0.15  | 1180 | 1.50  | 0.15  | 177    | 1.46  | 0.18 | 1148   | 1.59  | 0.20 | 1325 | 1.57  | 0.21 |
| Apolipoprotein B (g/L)                                    | 575      | 0.68  | 0.13 | 604   | 0.71  | 0.14  | 1179 | 0.69  | 0.14  | 177    | 0.96  | 0.25 | 1148   | 0.81  | 0.20 | 1325 | 0.83  | 0.21 |
| Ratio of apolipoprotein B to apolipoprotein AI            | 575      | 0.46  | 0.10 | 604   | 0.48  | 0.10  | 1179 | 0.47  | 0.10  | 177    | 0.66  | 0.18 | 1148   | 0.52  | 0.14 | 1325 | 0.54  | 0.15 |
| <b>Fatty acids</b>                                        |          |       |      |       |       |       |      |       |       |        |       |      |        |       |      |      |       |      |
| Total fatty acids (mmol/L)                                | 570      | 9.21  | 1.70 | 604   | 9.37  | 1.73  | 1174 | 9.29  | 1.71  | 173    | 11.85 | 2.72 | 1145   | 10.92 | 2.39 | 1318 | 11.03 | 2.45 |
| Estimated degree of unsaturation                          | 570      | 1.21  | 0.06 | 604   | 1.20  | 0.06  | 1174 | 1.20  | 0.06  | 173    | 1.18  | 0.07 | 1145   | 1.21  | 0.07 | 1318 | 1.21  | 0.07 |
| 22:6, docosahexaenoic acid (mmol/L)                       | 570      | 0.08  | 0.03 | 604   | 0.07  | 0.03  | 1174 | 0.08  | 0.03  | 173    | 0.12  | 0.05 | 1145   | 0.11  | 0.04 | 1318 | 0.11  | 0.04 |



|    |                                                              |     |       |      |     |       |      |      |       |      |     |       |      |      |       |      |      |       |      |  |
|----|--------------------------------------------------------------|-----|-------|------|-----|-------|------|------|-------|------|-----|-------|------|------|-------|------|------|-------|------|--|
| 1  | 18:2, linoleic acid (mmol/L)                                 | 570 | 2.54  | 0.46 | 604 | 2.59  | 0.46 | 1174 | 2.57  | 0.46 | 173 | 2.92  | 0.57 | 1145 | 2.88  | 0.58 | 1318 | 2.89  | 0.58 |  |
| 2  | Omega3 fatty acids (mmol/L)                                  | 570 | 0.31  | 0.09 | 604 | 0.30  | 0.08 | 1174 | 0.30  | 0.08 | 173 | 0.45  | 0.16 | 1145 | 0.40  | 0.12 | 1318 | 0.41  | 0.12 |  |
| 3  | Omega6 fatty acids (mmol/L)                                  | 570 | 3.08  | 0.49 | 604 | 3.09  | 0.49 | 1174 | 3.09  | 0.49 | 173 | 3.55  | 0.65 | 1145 | 3.51  | 0.63 | 1318 | 3.51  | 0.63 |  |
| 4  | Polyunsat. fatty acids (mmol/L)                              | 570 | 3.39  | 0.56 | 604 | 3.39  | 0.56 | 1174 | 3.39  | 0.56 | 173 | 4.00  | 0.77 | 1145 | 3.91  | 0.72 | 1318 | 3.92  | 0.73 |  |
| 5  | Monounsat. fatty acids; 16:1, 18:1 (mmol/L)                  | 570 | 2.50  | 0.63 | 604 | 2.59  | 0.66 | 1174 | 2.54  | 0.65 | 173 | 3.52  | 1.06 | 1145 | 3.08  | 0.92 | 1318 | 3.14  | 0.94 |  |
| 5  | Saturated fatty acids (mmol/L)                               | 570 | 3.33  | 0.64 | 604 | 3.39  | 0.68 | 1174 | 3.36  | 0.66 | 173 | 4.33  | 1.09 | 1145 | 3.93  | 0.93 | 1318 | 3.98  | 0.96 |  |
| 6  | <b>Fatty acid ratios</b>                                     |     |       |      |     |       |      |      |       |      |     |       |      |      |       |      |      |       |      |  |
| 7  | Ratio of 22:6 docosaheptaenoic acid to total fatty acids (%) | 570 | 0.84  | 0.24 | 604 | 0.79  | 0.27 | 1174 | 0.81  | 0.25 | 173 | 0.98  | 0.31 | 1145 | 1.02  | 0.28 | 1318 | 1.02  | 0.29 |  |
| 8  | Ratio of 18:2 linoleic acid to total fatty acids (%)         | 570 | 27.74 | 3.13 | 604 | 27.87 | 3.27 | 1174 | 27.81 | 3.19 | 173 | 25.04 | 3.57 | 1145 | 26.66 | 3.42 | 1318 | 26.45 | 3.47 |  |
| 9  | Ratio of omega3 fatty acids to total fatty acids (%)         | 570 | 3.33  | 0.58 | 604 | 3.15  | 0.60 | 1174 | 3.24  | 0.59 | 173 | 3.76  | 0.80 | 1145 | 3.66  | 0.70 | 1318 | 3.67  | 0.71 |  |
| 9  | Ratio of omega6 fatty acids to total fatty acids (%)         | 570 | 33.65 | 3.05 | 604 | 33.31 | 3.23 | 1174 | 33.48 | 3.13 | 173 | 30.47 | 3.76 | 1145 | 32.50 | 3.31 | 1318 | 32.25 | 3.42 |  |
| 10 | Ratio of polyunsat. fatty acids to total fatty acids (%)     | 570 | 36.98 | 3.24 | 604 | 36.46 | 3.51 | 1174 | 36.71 | 3.38 | 173 | 34.23 | 3.88 | 1145 | 36.16 | 3.59 | 1318 | 35.92 | 3.67 |  |
| 11 | Ratio of monounsat. fatty acids to total fatty acids (%)     | 570 | 26.91 | 2.57 | 604 | 27.38 | 2.68 | 1174 | 27.15 | 2.63 | 173 | 29.37 | 2.97 | 1145 | 27.89 | 2.84 | 1318 | 28.07 | 2.89 |  |
| 11 | Ratio of saturated fatty acids to total fatty acids (%)      | 570 | 36.11 | 1.68 | 604 | 36.17 | 1.80 | 1174 | 36.14 | 1.73 | 173 | 36.40 | 2.03 | 1145 | 35.95 | 2.03 | 1318 | 36.01 | 2.03 |  |
| 12 | <b>Amino acids</b>                                           |     |       |      |     |       |      |      |       |      |     |       |      |      |       |      |      |       |      |  |
| 13 | Pyruvate (mmol/L)                                            | 574 | 0.10  | 0.02 | 605 | 0.10  | 0.02 | 1179 | 0.10  | 0.02 | 177 | 0.10  | 0.03 | 1147 | 0.09  | 0.03 | 1324 | 0.09  | 0.03 |  |
| 14 | Citrate (mmol/L)                                             | 575 | 0.12  | 0.02 | 604 | 0.13  | 0.02 | 1179 | 0.13  | 0.02 | 177 | 0.11  | 0.02 | 1148 | 0.11  | 0.02 | 1325 | 0.11  | 0.02 |  |
| 15 | Glycerol (mmol/L)                                            | 240 | 0.08  | 0.02 | 283 | 0.08  | 0.02 | 523  | 0.08  | 0.02 | 84  | 0.07  | 0.02 | 470  | 0.07  | 0.02 | 554  | 0.07  | 0.02 |  |
| 16 | <b>Ketone bodies</b>                                         |     |       |      |     |       |      |      |       |      |     |       |      |      |       |      |      |       |      |  |
| 17 | Alanine (mmol/L)                                             | 575 | 0.39  | 0.06 | 605 | 0.40  | 0.06 | 1180 | 0.39  | 0.06 | 176 | 0.42  | 0.06 | 1147 | 0.40  | 0.06 | 1323 | 0.40  | 0.06 |  |
| 18 | Glutamine (mmol/L)                                           | 575 | 0.47  | 0.05 | 605 | 0.50  | 0.05 | 1180 | 0.49  | 0.05 | 177 | 0.49  | 0.06 | 1148 | 0.46  | 0.07 | 1325 | 0.46  | 0.07 |  |
| 18 | Glycine (mmol/L)                                             | 574 | 0.26  | 0.03 | 604 | 0.27  | 0.03 | 1178 | 0.27  | 0.03 | 176 | 0.24  | 0.03 | 1148 | 0.27  | 0.06 | 1324 | 0.27  | 0.06 |  |
| 19 | Histidine (mmol/L)                                           | 574 | 0.06  | 0.01 | 605 | 0.07  | 0.01 | 1179 | 0.07  | 0.01 | 176 | 0.07  | 0.01 | 1148 | 0.07  | 0.01 | 1324 | 0.07  | 0.01 |  |
| 20 | Isoleucine (mmol/L)                                          | 574 | 0.05  | 0.02 | 605 | 0.05  | 0.02 | 1179 | 0.05  | 0.02 | 174 | 0.07  | 0.02 | 1146 | 0.05  | 0.02 | 1320 | 0.06  | 0.02 |  |
| 20 | Leucine (mmol/L)                                             | 575 | 0.07  | 0.02 | 605 | 0.07  | 0.02 | 1180 | 0.07  | 0.02 | 177 | 0.10  | 0.03 | 1148 | 0.07  | 0.02 | 1325 | 0.08  | 0.02 |  |
| 21 | Valine (mmol/L)                                              | 575 | 0.16  | 0.04 | 604 | 0.16  | 0.04 | 1179 | 0.16  | 0.04 | 177 | 0.19  | 0.04 | 1147 | 0.16  | 0.04 | 1324 | 0.17  | 0.04 |  |
| 22 | Phenylalanine (mmol/L)                                       | 575 | 0.07  | 0.01 | 605 | 0.07  | 0.01 | 1180 | 0.07  | 0.01 | 177 | 0.07  | 0.01 | 1148 | 0.07  | 0.01 | 1325 | 0.07  | 0.01 |  |
| 22 | Tyrosine (mmol/L)                                            | 574 | 0.05  | 0.01 | 605 | 0.05  | 0.01 | 1179 | 0.05  | 0.01 | 176 | 0.06  | 0.01 | 1148 | 0.05  | 0.01 | 1324 | 0.05  | 0.01 |  |
| 23 | <b>Glycolysis related</b>                                    |     |       |      |     |       |      |      |       |      |     |       |      |      |       |      |      |       |      |  |
| 24 | Acetate (mmol/L)*                                            | 575 | 0.031 | 0.05 | 605 | 0.03  | 0.04 | 1180 | 0.03  | 0.05 | 177 | 0.037 | 0.11 | 1146 | 0.033 | 0.09 | 1323 | 0.034 | 0.09 |  |
| 25 | Acetoacetate (mmol/L)*                                       | 575 | 0.025 | 0.27 | 605 | 0.023 | 0.30 | 1180 | 0.024 | 0.28 | 177 | 0.023 | 0.45 | 1147 | 0.024 | 0.26 | 1324 | 0.024 | 0.29 |  |
| 26 | 3hydroxybutyrate (mmol/L)*                                   | 555 | 0.10  | 0.21 | 580 | 0.103 | 0.23 | 1135 | 0.101 | 0.22 | 170 | 0.104 | 0.16 | 1098 | 0.096 | 0.20 | 1268 | 0.097 | 0.20 |  |
| 27 | <b>Inflammation</b>                                          |     |       |      |     |       |      |      |       |      |     |       |      |      |       |      |      |       |      |  |
| 28 | Glycoprotein acetyls, mainly a1acid glycoprotein (mmol/L)    | 575 | 1.17  | 0.19 | 605 | 1.17  | 0.19 | 1180 | 1.17  | 0.19 | 177 | 1.38  | 0.37 | 1148 | 1.24  | 0.23 | 1325 | 1.26  | 0.26 |  |

\* geometric mean [relative SD] when skewed variable

**Supplementary table 2: Differences in mean metabolite levels in adults compared to children in absolute concentration units.**

| Metabolic subgroup                                          | Differences by age (Parents - Child) |                  |         |                          |
|-------------------------------------------------------------|--------------------------------------|------------------|---------|--------------------------|
|                                                             | Estimate                             | 95% CI           | p-value | Conversion factor (SD) # |
| <b>Lipoprotein subclass lipids</b>                          |                                      |                  |         |                          |
| Total lipids in chylomicrons & ex.large VLDL (mmol/L)*      | 0.704                                | (0.519, 0.890)   | <0.001  | 2.53                     |
| Total lipids in very large VLDL (mmol/L)*                   | 0.922                                | (0.700, 1.145)   | <0.001  | 3.03                     |
| Total lipids in large VLDL (mmol/L)*                        | 0.648                                | (0.502, 0.795)   | <0.001  | 1.95                     |
| Total lipids in medium VLDL (mmol/L)                        | 0.105                                | (0.080, 0.129)   | <0.001  | 0.35                     |
| Total lipids in small VLDL (mmol/L)                         | 0.107                                | (0.094, 0.121)   | <0.001  | 0.20                     |
| Total lipids in very small VLDL (mmol/L)                    | 0.093                                | (0.086, 0.099)   | <0.001  | 0.10                     |
| Total lipids in IDL (mmol/L)                                | 0.181                                | (0.166, 0.196)   | <0.001  | 0.23                     |
| Total lipids in large LDL (mmol/L)                          | 0.229                                | (0.211, 0.247)   | <0.001  | 0.29                     |
| Total lipids in medium LDL (mmol/L)                         | 0.144                                | (0.132, 0.155)   | <0.001  | 0.18                     |
| Total lipids in small LDL (mmol/L)                          | 0.089                                | (0.082, 0.096)   | <0.001  | 0.11                     |
| Total lipids in very large HDL (mmol/L)                     | 0.012                                | (-0.003, 0.027)  | 0.128   | 0.22                     |
| Total lipids in large HDL (mmol/L)                          | 0.032                                | (0.007, 0.057)   | 0.011   | 0.35                     |
| Total lipids in medium HDL (mmol/L)                         | 0.076                                | (0.064, 0.089)   | <0.001  | 0.17                     |
| Total lipids in small HDL (mmol/L)                          | 0.068                                | (0.058, 0.078)   | <0.001  | 0.14                     |
| <b>Lipoprotein particle size</b>                            |                                      |                  |         |                          |
| Mean diameter for VLDL particles (nm)                       | -0.147                               | (-0.263, -0.031) | 0.013   | 1.63                     |
| Mean diameter for LDL particles (nm)                        | -0.044                               | (-0.052, -0.037) | <0.001  | 0.11                     |
| Mean diameter for HDL particles (nm)                        | -0.027                               | (-0.045, -0.010) | 0.002   | 0.26                     |
| <b>Cholesterol</b>                                          |                                      |                  |         |                          |
| Serum total cholesterol (mmol/L)                            | 0.670                                | (0.619, 0.721)   | <0.001  | 0.80                     |
| Total cholesterol in VLDL (mmol/L)                          | 0.146                                | (0.129, 0.163)   | <0.001  | 0.25                     |
| Remnant cholesterol (nonHDL, nonLDL cholesterol) (mmol/L)   | 0.261                                | (0.237, 0.284)   | <0.001  | 0.36                     |
| Total cholesterol in LDL (mmol/L)                           | 0.327                                | (0.300, 0.354)   | <0.001  | 0.42                     |
| Total cholesterol in HDL (mmol/L)                           | 0.082                                | (0.058, 0.106)   | <0.001  | 0.34                     |
| Total cholesterol in HDL2 (mmol/L)                          | 0.064                                | (0.042, 0.086)   | <0.001  | 0.31                     |
| Total cholesterol in HDL3 (mmol/L)                          | 0.018                                | (0.016, 0.020)   | <0.001  | 0.03                     |
| Esterified cholesterol (mmol/L)                             | 0.474                                | (0.437, 0.511)   | <0.001  | 0.58                     |
| Free cholesterol (mmol/L)                                   | 0.195                                | (0.180, 0.210)   | <0.001  | 0.23                     |
| <b>Glycerides and phospholipids</b>                         |                                      |                  |         |                          |
| Serum total triglycerides (mmol/L)*                         | 0.176                                | (0.145, 0.206)   | <0.001  | 0.44                     |
| Triglycerides in VLDL (mmol/L)*                             | 0.140                                | (0.096, 0.183)   | <0.001  | 0.62                     |
| Triglycerides in LDL (mmol/L)                               | 0.040                                | (0.038, 0.043)   | <0.001  | 0.04                     |
| Triglycerides in HDL (mmol/L)                               | 0.020                                | (0.017, 0.022)   | <0.001  | 0.04                     |
| Total phosphoglycerides (mmol/L)                            | 0.311                                | (0.290, 0.332)   | <0.001  | 0.34                     |
| Ratio of triglycerides to phosphoglycerides                 | 0.049                                | (0.027, 0.071)   | <0.001  | 0.30                     |
| Phosphatidylcholine & other cholines (mmol/L)               | 0.295                                | (0.274, 0.316)   | <0.001  | 0.33                     |
| Sphingomyelins (mmol/L)                                     | 0.052                                | (0.047, 0.057)   | <0.001  | 0.08                     |
| Total cholines (mmol/L)                                     | 0.323                                | (0.302, 0.345)   | <0.001  | 0.35                     |
| <b>Apolipoproteins</b>                                      |                                      |                  |         |                          |
| Apolipoprotein A1 (g/L)                                     | 0.099                                | (0.086, 0.112)   | <0.001  | 0.19                     |
| Apolipoprotein B (g/L)                                      | 0.125                                | (0.113, 0.137)   | <0.001  | 0.18                     |
| Ratio of apolipoprotein B to apolipoprotein A1              | 0.055                                | (0.046, 0.064)   | <0.001  | 0.13                     |
| <b>Fatty acids</b>                                          |                                      |                  |         |                          |
| Total fatty acids (mmol/L)                                  | 1.738                                | (1.592, 1.885)   | <0.001  | 2.24                     |
| Estimated degree of unsaturation                            | 0.005                                | (0.000, 0.009)   | 0.030   | 0.06                     |
| 22:6, docosahexaenoic acid (mmol/L)                         | 0.037                                | (0.035, 0.040)   | <0.001  | 0.04                     |
| 18:2, linoleic acid (mmol/L)                                | 0.347                                | (0.310, 0.384)   | <0.001  | 0.54                     |
| Omega3 fatty acids (mmol/L)                                 | 0.105                                | (0.098, 0.113)   | <0.001  | 0.12                     |
| Omega6 fatty acids (mmol/L)                                 | 0.453                                | (0.414, 0.492)   | <0.001  | 0.60                     |
| Polyunsat. fatty acids (mmol/L)                             | 0.558                                | (0.513, 0.603)   | <0.001  | 0.70                     |
| Monounsat. fatty acids; 16:1, 18:1 (mmol/L)                 | 0.568                                | (0.512, 0.625)   | <0.001  | 0.85                     |
| Saturated fatty acids (mmol/L)                              | 0.612                                | (0.554, 0.669)   | <0.001  | 0.86                     |
| <b>Fatty acid ratios</b>                                    |                                      |                  |         |                          |
| Ratio of 22:6 docosahexaenoic acid to total fatty acids (%) | 0.209                                | (0.190, 0.228)   | <0.001  | 0.29                     |
| Ratio of 18:2 linoleic acid to total fatty acids (%)        | -1.079                               | (-1.331, -0.827) | <0.001  | 3.39                     |
| Ratio of omega3 fatty acids to total fatty acids (%)        | 0.446                                | (0.403, 0.490)   | <0.001  | 0.69                     |
| Ratio of omega6 fatty acids to total fatty acids (%)        | -0.992                               | (-1.227, -0.757) | <0.001  | 3.30                     |
| Ratio of polyunsat. fatty acids to total fatty acids (%)    | -0.546                               | (-0.794, -0.298) | <0.001  | 3.51                     |
| Ratio of monounsat. fatty acids to total fatty acids (%)    | 0.741                                | (0.547, 0.934)   | <0.001  | 2.80                     |

|    |                                                           |        |                  |        |      |
|----|-----------------------------------------------------------|--------|------------------|--------|------|
| 1  |                                                           |        |                  |        |      |
| 2  | Ratio of saturated fatty acids to total fatty acids (%)   | -0.195 | (-0.328, -0.062) | 0.004  | 1.86 |
| 3  | <b>Glycolysis related</b>                                 |        |                  |        |      |
| 4  | Pyruvate (mmol/L)                                         | -0.007 | (-0.009, -0.005) | <0.001 | 0.03 |
| 5  | Citrate (mmol/L)                                          | -0.017 | (-0.018, -0.016) | <0.001 | 0.02 |
| 6  | Glycerol (mmol/L)                                         | -0.011 | (-0.015, -0.008) | <0.001 | 0.02 |
| 7  | <b>Amino acids</b>                                        |        |                  |        |      |
| 8  | Alanine (mmol/L)                                          | 0.013  | (0.009, 0.017)   | <0.001 | 0.06 |
| 9  | Glutamine (mmol/L)                                        | -0.023 | (-0.027, -0.019) | <0.001 | 0.06 |
| 10 | Glycine (mmol/L)                                          | 0.007  | (0.003, 0.010)   | <0.001 | 0.05 |
| 11 | Histidine (mmol/L)                                        | 0.001  | (0.000, 0.002)   | 0.005  | 0.01 |
| 12 | Isoleucine (mmol/L)                                       | 0.003  | (0.002, 0.004)   | <0.001 | 0.02 |
| 13 | Leucine (mmol/L)                                          | 0.004  | (0.003, 0.006)   | <0.001 | 0.02 |
| 14 | Valine (mmol/L)                                           | 0.009  | (0.006, 0.011)   | <0.001 | 0.04 |
| 15 | Phenylalanine (mmol/L)                                    | 0.005  | (0.005, 0.006)   | <0.001 | 0.01 |
| 16 | Tyrosine (mmol/L)                                         | 0.001  | (-0.000, 0.002)  | 0.100  | 0.01 |
| 17 | <b>Ketone bodies</b>                                      |        |                  |        |      |
| 18 | Acetate (mmol/L)*                                         | 0.101  | (0.084, 0.117)   | <0.001 | 0.23 |
| 19 | Acetoacetate (mmol/L)*                                    | -0.004 | (-0.086, 0.078)  | 0.922  | 1.02 |
| 20 | 3hydroxybutyrate (mmol/L)*                                | -0.064 | (-0.100, -0.028) | 0.001  | 0.49 |
| 21 | <b>Inflammation</b>                                       |        |                  |        |      |
| 22 | Glycoprotein acetyls, mainly a1acid glycoprotein (mmol/L) | 0.062  | (0.047, 0.078)   | <0.001 | 0.22 |

\*metabolite has been log transformed

# Associations in Figure 2 are presented in SD-units. The conversion factor provided (unweighted standard deviation of each metabolite measure) can be used to convert the association in absolute concentration to SD units by dividing by the conversion factor.

Where metabolite has been log transformed conversion factor is standard deviation of log transformed metabolite

Supplementary table 3: Differences in mean metabolite levels in girls compared to boys in absolute concentration units.

| Metabolic subgroup                                          | Differences for children (Girls - Boys) |                  |         |                          |
|-------------------------------------------------------------|-----------------------------------------|------------------|---------|--------------------------|
|                                                             | Estimate                                | 95% CI           | p-value | Conversion factor (SD) # |
| <b>Lipoprotein subclass lipids</b>                          |                                         |                  |         |                          |
| Total lipids in chylomicrons & ex.large VLDL (mmol/L)*      | 0.737                                   | (0.414, 1.059)   | <0.001  | 2.84                     |
| Total lipids in very large VLDL (mmol/L)*                   | 0.744                                   | (0.355, 1.134)   | <0.001  | 3.43                     |
| Total lipids in large VLDL (mmol/L)*                        | 0.663                                   | (0.390, 0.936)   | <0.001  | 2.41                     |
| Total lipids in medium VLDL (mmol/L)                        | 0.049                                   | (0.018, 0.080)   | 0.002   | 0.27                     |
| Total lipids in small VLDL (mmol/L)                         | 0.032                                   | (0.015, 0.048)   | <0.001  | 0.15                     |
| Total lipids in very small VLDL (mmol/L)                    | 0.018                                   | (0.010, 0.027)   | <0.001  | 0.07                     |
| Total lipids in IDL (mmol/L)                                | 0.025                                   | (0.004, 0.046)   | 0.017   | 0.18                     |
| Total lipids in large LDL (mmol/L)                          | 0.020                                   | (-0.006, 0.046)  | 0.132   | 0.23                     |
| Total lipids in medium LDL (mmol/L)                         | 0.008                                   | (-0.008, 0.024)  | 0.338   | 0.14                     |
| Total lipids in small LDL (mmol/L)                          | 0.001                                   | (-0.008, 0.011)  | 0.788   | 0.09                     |
| Total lipids in very large HDL (mmol/L)                     | -0.002                                  | (-0.023, 0.020)  | 0.882   | 0.19                     |
| Total lipids in large HDL (mmol/L)                          | -0.033                                  | (-0.066, -0.001) | 0.044   | 0.28                     |
| Total lipids in medium HDL (mmol/L)                         | -0.045                                  | (-0.059, -0.030) | <0.001  | 0.13                     |
| Total lipids in small HDL (mmol/L)                          | -0.035                                  | (-0.048, -0.022) | <0.001  | 0.12                     |
| <b>Lipoprotein particle size</b>                            |                                         |                  |         |                          |
| Mean diameter for VLDL particles (nm)                       | 0.215                                   | (0.035, 0.395)   | 0.019   | 1.58                     |
| Mean diameter for LDL particles (nm)                        | 0.035                                   | (0.023, 0.047)   | <0.001  | 0.11                     |
| Mean diameter for HDL particles (nm)                        | 0.003                                   | (-0.023, 0.028)  | 0.847   | 0.23                     |
| <b>Cholesterol</b>                                          |                                         |                  |         |                          |
| Serum total cholesterol (mmol/L)                            | 0.007                                   | (-0.066, 0.079)  | 0.857   | 0.63                     |
| Total cholesterol in VLDL (mmol/L)                          | 0.040                                   | (0.019, 0.061)   | <0.001  | 0.18                     |
| Remnant cholesterol (nonHDL, nonLDL cholesterol) (mmol/L)   | 0.053                                   | (0.023, 0.083)   | 0.001   | 0.27                     |
| Total cholesterol in LDL (mmol/L)                           | 0.016                                   | (-0.023, 0.054)  | 0.427   | 0.34                     |
| Total cholesterol in HDL (mmol/L)                           | -0.062                                  | (-0.093, -0.031) | <0.001  | 0.27                     |
| Total cholesterol in HDL2 (mmol/L)                          | -0.059                                  | (-0.087, -0.030) | <0.001  | 0.25                     |
| Total cholesterol in HDL3 (mmol/L)                          | -0.003                                  | (-0.006, -0.001) | 0.013   | 0.02                     |
| Esterified cholesterol (mmol/L)                             | -0.008                                  | (-0.060, 0.044)  | 0.755   | 0.45                     |
| Free cholesterol (mmol/L)                                   | 0.013                                   | (-0.008, 0.034)  | 0.211   | 0.18                     |
| <b>Glycerides and phospholipids</b>                         |                                         |                  |         |                          |
| Serum total triglycerides (mmol/L)*                         | 0.101                                   | (0.056, 0.145)   | <0.001  | 0.39                     |
| Triglycerides in VLDL (mmol/L)*                             | 0.125                                   | (0.062, 0.187)   | <0.001  | 0.55                     |
| Triglycerides in LDL (mmol/L)                               | 0.009                                   | (0.006, 0.012)   | <0.001  | 0.03                     |
| Triglycerides in HDL (mmol/L)                               | 0.007                                   | (0.004, 0.011)   | <0.001  | 0.03                     |
| Total phosphoglycerides (mmol/L)                            | -0.018                                  | (-0.047, 0.010)  | 0.206   | 0.25                     |
| Ratio of triglycerides to phosphoglycerides                 | 0.051                                   | (0.020, 0.083)   | 0.001   | 0.27                     |
| Phosphatidylcholine & other cholines (mmol/L)               | -0.011                                  | (-0.040, 0.018)  | 0.447   | 0.25                     |
| Sphingomyelins (mmol/L)                                     | -0.001                                  | (-0.009, 0.006)  | 0.706   | 0.06                     |
| Total cholines (mmol/L)                                     | -0.017                                  | (-0.046, 0.013)  | 0.268   | 0.26                     |
| <b>Apolipoproteins</b>                                      |                                         |                  |         |                          |
| Apolipoprotein A1 (g/L)                                     | -0.030                                  | (-0.048, -0.013) | 0.001   | 0.16                     |
| Apolipoprotein B (g/L)                                      | 0.027                                   | (0.012, 0.042)   | 0.001   | 0.13                     |
| Ratio of apolipoprotein B to apolipoprotein A1              | 0.027                                   | (0.016, 0.038)   | <0.001  | 0.10                     |
| <b>Fatty acids</b>                                          |                                         |                  |         |                          |
| Total fatty acids (mmol/L)                                  | 0.200                                   | (0.011, 0.389)   | 0.038   | 1.65                     |
| Estimated degree of unsaturation                            | -0.016                                  | (-0.022, -0.009) | <0.001  | 0.06                     |
| 22:6, docosahexaenoic acid (mmol/L)                         | -0.004                                  | (-0.007, -0.000) | 0.033   | 0.03                     |
| 18:2, linoleic acid (mmol/L)                                | 0.068                                   | (0.015, 0.120)   | 0.011   | 0.46                     |
| Omega3 fatty acids (mmol/L)                                 | -0.008                                  | (-0.018, 0.001)  | 0.083   | 0.08                     |
| Omega6 fatty acids (mmol/L)                                 | 0.031                                   | (-0.024, 0.087)  | 0.271   | 0.48                     |
| Polyunsat. fatty acids (mmol/L)                             | 0.023                                   | (-0.041, 0.086)  | 0.483   | 0.55                     |
| Monounsat. fatty acids; 16:1, 18:1 (mmol/L)                 | 0.105                                   | (0.034, 0.176)   | 0.004   | 0.62                     |
| Saturated fatty acids (mmol/L)                              | 0.073                                   | (-0.000, 0.146)  | 0.052   | 0.64                     |
| <b>Fatty acid ratios</b>                                    |                                         |                  |         |                          |
| Ratio of 22:6 docosahexaenoic acid to total fatty acids (%) | -0.049                                  | (-0.078, -0.019) | 0.001   | 0.25                     |
| Ratio of 18:2 linoleic acid to total fatty acids (%)        | 0.197                                   | (-0.173, 0.567)  | 0.297   | 3.23                     |
| Ratio of omega3 fatty acids to total fatty acids (%)        | -0.145                                  | (-0.213, -0.078) | <0.001  | 0.59                     |
| Ratio of omega6 fatty acids to total fatty acids (%)        | -0.302                                  | (-0.658, 0.054)  | 0.096   | 3.11                     |
| Ratio of polyunsat. fatty acids to total fatty acids (%)    | -0.447                                  | (-0.830, -0.065) | 0.022   | 3.35                     |
| Ratio of monounsat. fatty acids to total fatty acids (%)    | 0.499                                   | (0.202, 0.796)   | 0.001   | 2.61                     |
| Ratio of saturated fatty acids to total fatty acids (%)     | -0.051                                  | (-0.251, 0.148)  | 0.614   | 1.74                     |
| <b>Glycolysis related</b>                                   |                                         |                  |         |                          |
| Pyruvate (mmol/L)                                           | -0.001                                  | (-0.004, 0.002)  | 0.524   | 0.02                     |
| Citrate (mmol/L)                                            | 0.007                                   | (0.005, 0.009)   | <0.001  | 0.02                     |
| Glycerol (mmol/L)                                           | 0.006                                   | (0.002, 0.010)   | 0.004   | 0.02                     |
| <b>Amino acids</b>                                          |                                         |                  |         |                          |
| Alanine (mmol/L)                                            | 0.011                                   | (0.004, 0.017)   | 0.002   | 0.06                     |
| Glutamine (mmol/L)                                          | 0.023                                   | (0.018, 0.029)   | <0.001  | 0.05                     |
| Glycine (mmol/L)                                            | 0.010                                   | (0.006, 0.014)   | <0.001  | 0.03                     |
| Histidine (mmol/L)                                          | 0.001                                   | (-0.000, 0.002)  | 0.075   | 0.01                     |
| Isoleucine (mmol/L)                                         | -0.000                                  | (-0.003, 0.002)  | 0.637   | 0.02                     |
| Leucine (mmol/L)                                            | -0.002                                  | (-0.005, -0.000) | 0.022   | 0.02                     |
| Valine (mmol/L)                                             | -0.007                                  | (-0.011, -0.003) | 0.001   | 0.04                     |
| Phenylalanine (mmol/L)                                      | -0.002                                  | (-0.003, -0.001) | 0.003   | 0.01                     |
| Tyrosine (mmol/L)                                           | 0.000                                   | (-0.001, 0.002)  | 0.582   | 0.01                     |
| <b>Ketone bodies</b>                                        |                                         |                  |         |                          |
| Acetate (mmol/L)*                                           | -0.030                                  | (-0.048, -0.011) | 0.002   | 0.17                     |
| Acetoacetate (mmol/L)*                                      | -0.058                                  | (-0.172, 0.055)  | 0.313   | 0.99                     |

|   |                                                           |       |                 |       |      |
|---|-----------------------------------------------------------|-------|-----------------|-------|------|
| 1 | 3hydroxybutyrate (mmol/L)*                                | 0.041 | (-0.019, 0.101) | 0.178 | 0.51 |
| 2 |                                                           |       |                 |       |      |
| 3 | <b>Inflammation</b>                                       |       |                 |       |      |
| 4 | Glycoprotein acetyls, mainly a1acid glycoprotein (mmol/L) | 0.017 | (-0.004, 0.038) | 0.104 | 0.18 |

5 \*metabolite has been log transformed

6 # Associations for children in Figure 3 are presented in SD-units. The conversion factor provided (unweighted standard deviation of each metabolite measure in children  
7 can be used to convert the association in absolute concentration to SD units by dividing by the conversion factor.

8 Where metabolite has been log transformed conversion factor is standard deviation of log transformed metabolite

9  
10  
11  
12  
13  
14  
15  
16  
17  
18  
19  
20  
21  
22  
23  
24  
25  
26  
27  
28  
29  
30  
31  
32  
33  
34  
35  
36  
37  
38  
39  
40  
41  
42  
43  
44  
45  
46  
47  
48  
49  
50  
51  
52  
53  
54  
55  
56  
57  
58  
59  
60

For peer review only

**Supplementary table 4: Differences in mean metabolite levels in female compared to male adults in absolute concentration units.**

| Metabolic subgroup                                          | Differences for adults (Female - Male) |                  |         |                          |
|-------------------------------------------------------------|----------------------------------------|------------------|---------|--------------------------|
|                                                             | Estimate                               | 95% CI           | p-value | Conversion factor (SD) # |
| <b>Lipoprotein subclass lipids</b>                          |                                        |                  |         |                          |
| Total lipids in chylomicrons & ex.large VLDL (mmol/L)*      | -0.930                                 | (-1.271, -0.589) | <0.001  | 2.17                     |
| Total lipids in very large VLDL (mmol/L)*                   | -1.217                                 | (-1.617, -0.818) | <0.001  | 2.55                     |
| Total lipids in large VLDL (mmol/L)*                        | -0.900                                 | (-1.107, -0.693) | <0.001  | 1.34                     |
| Total lipids in medium VLDL (mmol/L)                        | -0.325                                 | (-0.385, -0.264) | <0.001  | 0.40                     |
| Total lipids in small VLDL (mmol/L)                         | -0.167                                 | (-0.201, -0.133) | <0.001  | 0.22                     |
| Total lipids in very small VLDL (mmol/L)                    | -0.022                                 | (-0.039, -0.005) | 0.013   | 0.11                     |
| Total lipids in IDL (mmol/L)                                | 0.014                                  | (-0.023, 0.051)  | 0.465   | 0.24                     |
| Total lipids in large LDL (mmol/L)                          | -0.011                                 | (-0.058, 0.035)  | 0.634   | 0.29                     |
| Total lipids in medium LDL (mmol/L)                         | -0.028                                 | (-0.057, 0.001)  | 0.058   | 0.18                     |
| Total lipids in small LDL (mmol/L)                          | -0.017                                 | (-0.035, 0.001)  | 0.061   | 0.11                     |
| Total lipids in very large HDL (mmol/L)                     | 0.195                                  | (0.158, 0.231)   | <0.001  | 0.24                     |
| Total lipids in large HDL (mmol/L)                          | 0.395                                  | (0.334, 0.455)   | <0.001  | 0.41                     |
| Total lipids in medium HDL (mmol/L)                         | 0.129                                  | (0.101, 0.158)   | <0.001  | 0.18                     |
| Total lipids in small HDL (mmol/L)                          | 0.002                                  | (-0.021, 0.025)  | 0.850   | 0.14                     |
| <b>Lipoprotein particle size</b>                            |                                        |                  |         |                          |
| Mean diameter for VLDL particles (nm)                       | -1.414                                 | (-1.669, -1.159) | <0.001  | 1.68                     |
| Mean diameter for LDL particles (nm)                        | 0.081                                  | (0.066, 0.096)   | <0.001  | 0.10                     |
| Mean diameter for HDL particles (nm)                        | 0.278                                  | (0.236, 0.320)   | <0.001  | 0.28                     |
| <b>Cholesterol</b>                                          |                                        |                  |         |                          |
| Serum total cholesterol (mmol/L)                            | 0.112                                  | (-0.018, 0.241)  | 0.091   | 0.82                     |
| Total cholesterol in VLDL (mmol/L)                          | -0.187                                 | (-0.230, -0.145) | <0.001  | 0.28                     |
| Remnant cholesterol (nonHDL, nonLDL cholesterol) (mmol/L)   | -0.184                                 | (-0.244, -0.124) | <0.001  | 0.38                     |
| Total cholesterol in LDL (mmol/L)                           | -0.048                                 | (-0.117, 0.021)  | 0.175   | 0.44                     |
| Total cholesterol in HDL (mmol/L)                           | 0.344                                  | (0.286, 0.401)   | <0.001  | 0.38                     |
| Total cholesterol in HDL2 (mmol/L)                          | 0.324                                  | (0.271, 0.378)   | <0.001  | 0.35                     |
| Total cholesterol in HDL3 (mmol/L)                          | 0.019                                  | (0.014, 0.025)   | <0.001  | 0.03                     |
| Esterified cholesterol (mmol/L)                             | 0.070                                  | (-0.023, 0.163)  | 0.139   | 0.59                     |
| Free cholesterol (mmol/L)                                   | 0.046                                  | (0.009, 0.084)   | 0.016   | 0.24                     |
| <b>Glycerides and phospholipids</b>                         |                                        |                  |         |                          |
| Serum total triglycerides (mmol/L)*                         | -0.344                                 | (-0.416, -0.273) | <0.001  | 0.47                     |
| Triglycerides in VLDL (mmol/L)*                             | -0.530                                 | (-0.630, -0.429) | <0.001  | 0.66                     |
| Triglycerides in LDL (mmol/L)                               | 0.008                                  | (0.001, 0.014)   | 0.033   | 0.04                     |
| Triglycerides in HDL (mmol/L)                               | -0.004                                 | (-0.010, 0.002)  | 0.228   | 0.04                     |
| Total phosphoglycerides (mmol/L)                            | 0.106                                  | (0.052, 0.159)   | <0.001  | 0.34                     |
| Ratio of triglycerides to phosphoglycerides                 | -0.289                                 | (-0.337, -0.241) | <0.001  | 0.32                     |
| Phosphatidylcholine & other cholines (mmol/L)               | 0.138                                  | (0.086, 0.190)   | <0.001  | 0.33                     |
| Sphingomyelins (mmol/L)                                     | 0.032                                  | (0.020, 0.045)   | <0.001  | 0.08                     |
| Total cholines (mmol/L)                                     | 0.170                                  | (0.115, 0.224)   | <0.001  | 0.35                     |
| <b>Apolipoproteins</b>                                      |                                        |                  |         |                          |
| Apolipoprotein A1 (g/L)                                     | 0.146                                  | (0.114, 0.178)   | <0.001  | 0.21                     |
| Apolipoprotein B (g/L)                                      | -0.115                                 | (-0.146, -0.084) | <0.001  | 0.20                     |
| Ratio of apolipoprotein B to apolipoprotein AI              | -0.126                                 | (-0.148, -0.105) | <0.001  | 0.14                     |
| <b>Fatty acids</b>                                          |                                        |                  |         |                          |
| Total fatty acids (mmol/L)                                  | -0.711                                 | (-1.091, -0.330) | <0.001  | 2.39                     |
| Estimated degree of unsaturation                            | 0.031                                  | (0.021, 0.042)   | <0.001  | 0.07                     |
| 22:6, docosahexaenoic acid (mmol/L)                         | -0.002                                 | (-0.008, 0.005)  | 0.622   | 0.04                     |
| 18:2, linoleic acid (mmol/L)                                | 0.004                                  | (-0.087, 0.094)  | 0.934   | 0.57                     |
| Omega3 fatty acids (mmol/L)                                 | -0.035                                 | (-0.054, -0.016) | <0.001  | 0.12                     |
| Omega6 fatty acids (mmol/L)                                 | 0.004                                  | (-0.094, 0.102)  | 0.936   | 0.61                     |
| Polyunsat. fatty acids (mmol/L)                             | -0.031                                 | (-0.144, 0.082)  | 0.592   | 0.71                     |
| Monounsatur. fatty acids; 16:1, 18:1 (mmol/L)               | -0.372                                 | (-0.520, -0.225) | <0.001  | 0.93                     |
| Saturated fatty acids (mmol/L)                              | -0.307                                 | (-0.455, -0.159) | <0.001  | 0.93                     |
| <b>Fatty acid ratios</b>                                    |                                        |                  |         |                          |
| Ratio of 22:6 docosahexaenoic acid to total fatty acids (%) | 0.064                                  | (0.018, 0.110)   | 0.006   | 0.29                     |
| Ratio of 18:2 linoleic acid to total fatty acids (%)        | 1.527                                  | (0.984, 2.070)   | <0.001  | 3.43                     |
| Ratio of omega3 fatty acids to total fatty acids (%)        | -0.038                                 | (-0.152, 0.075)  | 0.508   | 0.71                     |
| Ratio of omega6 fatty acids to total fatty acids (%)        | 1.882                                  | (1.351, 2.412)   | <0.001  | 3.38                     |
| Ratio of polyunsatur. fatty acids to total fatty acids (%)  | 1.843                                  | (1.272, 2.414)   | <0.001  | 3.62                     |
| Ratio of monounsatur. fatty acids to total fatty acids (%)  | -1.456                                 | (-1.914, -0.998) | <0.001  | 2.90                     |
| Ratio of saturated fatty acids to total fatty acids (%)     | -0.387                                 | (-0.700, -0.074) | 0.015   | 1.96                     |

**Glycolysis related**

|                   |        |                  |       |      |
|-------------------|--------|------------------|-------|------|
| Pyruvate (mmol/L) | -0.007 | (-0.013, -0.002) | 0.004 | 0.03 |
| Citrate (mmol/L)  | -0.001 | (-0.004, 0.001)  | 0.335 | 0.02 |
| Glycerol (mmol/L) | -0.003 | (-0.008, 0.002)  | 0.279 | 0.02 |

**Amino acids**

|                        |        |                  |        |      |
|------------------------|--------|------------------|--------|------|
| Alanine (mmol/L)       | -0.020 | (-0.030, -0.011) | <0.001 | 0.06 |
| Glutamine (mmol/L)     | -0.038 | (-0.048, -0.028) | <0.001 | 0.07 |
| Glycine (mmol/L)       | 0.029  | (0.020, 0.038)   | <0.001 | 0.06 |
| Histidine (mmol/L)     | -0.001 | (-0.003, 0.000)  | 0.116  | 0.01 |
| Isoleucine (mmol/L)    | -0.016 | (-0.019, -0.013) | <0.001 | 0.02 |
| Leucine (mmol/L)       | -0.019 | (-0.022, -0.016) | <0.001 | 0.02 |
| Valine (mmol/L)        | -0.029 | (-0.035, -0.022) | <0.001 | 0.04 |
| Phenylalanine (mmol/L) | -0.000 | (-0.002, 0.001)  | 0.576  | 0.01 |
| Tyrosine (mmol/L)      | -0.005 | (-0.007, -0.003) | <0.001 | 0.01 |

**Ketone bodies**

|                            |        |                  |       |      |
|----------------------------|--------|------------------|-------|------|
| Acetate (mmol/L)*          | -0.076 | (-0.119, -0.033) | 0.001 | 0.27 |
| Acetoacetate (mmol/L)*     | 0.018  | (-0.148, 0.184)  | 0.828 | 1.05 |
| 3hydroxybutyrate (mmol/L)* | -0.087 | (-0.163, -0.011) | 0.025 | 0.47 |

**Inflammation**

|                                                           |        |                  |        |      |
|-----------------------------------------------------------|--------|------------------|--------|------|
| Glycoprotein acetyls, mainly a1acid glycoprotein (mmol/L) | -0.098 | (-0.136, -0.061) | <0.001 | 0.24 |
|-----------------------------------------------------------|--------|------------------|--------|------|

\*metabolite has been log transformed

# Associations for parents in Figure 3 are presented in SD-units.

The conversion factor provided (unweighted standard deviation of each metabolite measure in adults/parents)

can be used to convert the association in absolute concentration to SD units by dividing by the conversion factor.

Where metabolite has been log transformed conversion factor is standard deviation of log transformed metabolite



Supplementary table 5: Mother-child concordance; correlations and partial correlations between mothers and their sons, daughters and all children.

| Metabolic subgroup                                          | Mother |      |             |     |       |             |     |      |              |     |      |             |     |      |             |     |      |             |
|-------------------------------------------------------------|--------|------|-------------|-----|-------|-------------|-----|------|--------------|-----|------|-------------|-----|------|-------------|-----|------|-------------|
|                                                             | Boys   |      |             |     | Girls |             |     |      | All Children |     |      |             |     |      |             |     |      |             |
|                                                             | n      | CC   | 95% CI      | n   | PCC#  | 95% CI      | n   | CC   | 95% CI       | n   | CC   | 95% CI      | n   | PCC# | 95% CI      |     |      |             |
| <b>Lipoprotein subclass lipids</b>                          |        |      |             |     |       |             |     |      |              |     |      |             |     |      |             |     |      |             |
| Total lipids in chylomicrons & ex.large VLDL (mmol/L)*      | 469    | 0.22 | 0.13 - 0.30 | 468 | 0.22  | 0.13 - 0.31 | 518 | 0.24 | 0.16 - 0.32  | 517 | 0.23 | 0.14 - 0.31 | 987 | 0.23 | 0.17 - 0.29 | 985 | 0.23 | 0.17 - 0.29 |
| Total lipids in very large VLDL (mmol/L)*                   | 469    | 0.25 | 0.16 - 0.33 | 468 | 0.25  | 0.16 - 0.33 | 518 | 0.22 | 0.14 - 0.30  | 517 | 0.21 | 0.13 - 0.29 | 987 | 0.24 | 0.18 - 0.29 | 985 | 0.23 | 0.17 - 0.29 |
| Total lipids in large VLDL (mmol/L)*                        | 469    | 0.22 | 0.13 - 0.30 | 468 | 0.22  | 0.13 - 0.30 | 518 | 0.23 | 0.14 - 0.31  | 517 | 0.21 | 0.13 - 0.29 | 987 | 0.22 | 0.16 - 0.28 | 985 | 0.21 | 0.15 - 0.27 |
| Total lipids in medium VLDL (mmol/L)                        | 469    | 0.26 | 0.17 - 0.34 | 468 | 0.25  | 0.17 - 0.34 | 518 | 0.29 | 0.21 - 0.37  | 517 | 0.28 | 0.20 - 0.36 | 987 | 0.28 | 0.22 - 0.34 | 985 | 0.27 | 0.22 - 0.33 |
| Total lipids in small VLDL (mmol/L)                         | 469    | 0.26 | 0.18 - 0.35 | 468 | 0.26  | 0.17 - 0.34 | 518 | 0.30 | 0.21 - 0.37  | 517 | 0.29 | 0.21 - 0.36 | 987 | 0.29 | 0.23 - 0.34 | 985 | 0.28 | 0.22 - 0.33 |
| Total lipids in very small VLDL (mmol/L)                    | 469    | 0.22 | 0.14 - 0.31 | 468 | 0.22  | 0.13 - 0.30 | 518 | 0.26 | 0.17 - 0.34  | 517 | 0.26 | 0.18 - 0.34 | 987 | 0.25 | 0.19 - 0.30 | 985 | 0.24 | 0.18 - 0.30 |
| Total lipids in IDL (mmol/L)                                | 469    | 0.27 | 0.18 - 0.35 | 468 | 0.26  | 0.17 - 0.34 | 518 | 0.29 | 0.21 - 0.37  | 517 | 0.30 | 0.22 - 0.37 | 987 | 0.29 | 0.23 - 0.34 | 985 | 0.28 | 0.22 - 0.34 |
| Total lipids in large LDL (mmol/L)                          | 469    | 0.28 | 0.19 - 0.36 | 468 | 0.27  | 0.18 - 0.35 | 518 | 0.30 | 0.22 - 0.37  | 517 | 0.30 | 0.22 - 0.38 | 987 | 0.29 | 0.23 - 0.35 | 985 | 0.29 | 0.23 - 0.34 |
| Total lipids in medium LDL (mmol/L)                         | 469    | 0.28 | 0.20 - 0.36 | 468 | 0.27  | 0.19 - 0.35 | 518 | 0.29 | 0.21 - 0.37  | 517 | 0.29 | 0.21 - 0.37 | 987 | 0.29 | 0.23 - 0.35 | 985 | 0.29 | 0.23 - 0.34 |
| Total lipids in small LDL (mmol/L)                          | 469    | 0.28 | 0.19 - 0.36 | 468 | 0.27  | 0.18 - 0.35 | 518 | 0.29 | 0.21 - 0.37  | 517 | 0.29 | 0.21 - 0.37 | 987 | 0.28 | 0.22 - 0.34 | 985 | 0.28 | 0.22 - 0.34 |
| Total lipids in very large HDL (mmol/L)                     | 469    | 0.30 | 0.22 - 0.38 | 468 | 0.29  | 0.21 - 0.38 | 518 | 0.32 | 0.24 - 0.39  | 517 | 0.32 | 0.24 - 0.39 | 987 | 0.31 | 0.25 - 0.36 | 985 | 0.30 | 0.25 - 0.36 |
| Total lipids in large HDL (mmol/L)                          | 469    | 0.31 | 0.23 - 0.39 | 468 | 0.31  | 0.22 - 0.39 | 518 | 0.28 | 0.20 - 0.36  | 517 | 0.28 | 0.20 - 0.36 | 987 | 0.30 | 0.24 - 0.35 | 985 | 0.29 | 0.23 - 0.35 |
| Total lipids in medium HDL (mmol/L)                         | 469    | 0.22 | 0.13 - 0.30 | 468 | 0.21  | 0.12 - 0.30 | 518 | 0.12 | 0.03 - 0.20  | 517 | 0.13 | 0.04 - 0.21 | 987 | 0.17 | 0.11 - 0.23 | 985 | 0.17 | 0.11 - 0.23 |
| Total lipids in small HDL (mmol/L)                          | 469    | 0.23 | 0.14 - 0.31 | 468 | 0.22  | 0.13 - 0.31 | 518 | 0.20 | 0.12 - 0.29  | 517 | 0.20 | 0.12 - 0.29 | 987 | 0.21 | 0.15 - 0.27 | 985 | 0.21 | 0.15 - 0.27 |
| <b>Lipoprotein particle size</b>                            |        |      |             |     |       |             |     |      |              |     |      |             |     |      |             |     |      |             |
| Mean diameter for VLDL particles (nm)                       | 469    | 0.30 | 0.22 - 0.38 | 468 | 0.30  | 0.22 - 0.38 | 518 | 0.27 | 0.19 - 0.35  | 517 | 0.26 | 0.18 - 0.34 | 987 | 0.29 | 0.23 - 0.35 | 985 | 0.28 | 0.22 - 0.34 |
| Mean diameter for LDL particles (nm)                        | 469    | 0.22 | 0.13 - 0.31 | 468 | 0.22  | 0.13 - 0.31 | 518 | 0.30 | 0.22 - 0.38  | 517 | 0.31 | 0.23 - 0.38 | 987 | 0.26 | 0.20 - 0.31 | 985 | 0.26 | 0.20 - 0.32 |
| Mean diameter for HDL particles (nm)                        | 469    | 0.32 | 0.23 - 0.40 | 468 | 0.31  | 0.23 - 0.39 | 518 | 0.33 | 0.26 - 0.41  | 517 | 0.33 | 0.25 - 0.41 | 987 | 0.33 | 0.27 - 0.38 | 985 | 0.32 | 0.26 - 0.38 |
| <b>Cholesterol</b>                                          |        |      |             |     |       |             |     |      |              |     |      |             |     |      |             |     |      |             |
| Serum total cholesterol (mmol/L)                            | 469    | 0.27 | 0.19 - 0.35 | 468 | 0.27  | 0.18 - 0.35 | 518 | 0.32 | 0.24 - 0.39  | 517 | 0.32 | 0.24 - 0.40 | 987 | 0.30 | 0.24 - 0.35 | 985 | 0.29 | 0.24 - 0.35 |
| Total cholesterol in VLDL (mmol/L)                          | 469    | 0.25 | 0.17 - 0.34 | 468 | 0.25  | 0.16 - 0.33 | 518 | 0.29 | 0.21 - 0.36  | 517 | 0.28 | 0.20 - 0.36 | 987 | 0.28 | 0.22 - 0.33 | 985 | 0.27 | 0.21 - 0.33 |
| Remnant cholesterol (nonHDL, nonLDL cholesterol) (mmol/L)   | 469    | 0.25 | 0.17 - 0.34 | 468 | 0.25  | 0.16 - 0.33 | 518 | 0.29 | 0.21 - 0.37  | 517 | 0.29 | 0.21 - 0.37 | 987 | 0.28 | 0.22 - 0.34 | 985 | 0.28 | 0.22 - 0.33 |
| Total cholesterol in LDL (mmol/L)                           | 469    | 0.28 | 0.20 - 0.36 | 468 | 0.27  | 0.19 - 0.35 | 518 | 0.29 | 0.21 - 0.37  | 517 | 0.29 | 0.21 - 0.37 | 987 | 0.29 | 0.23 - 0.34 | 985 | 0.29 | 0.23 - 0.34 |
| Total cholesterol in HDL (mmol/L)                           | 469    | 0.30 | 0.22 - 0.38 | 468 | 0.30  | 0.21 - 0.38 | 518 | 0.25 | 0.16 - 0.33  | 517 | 0.24 | 0.16 - 0.32 | 987 | 0.28 | 0.22 - 0.33 | 985 | 0.27 | 0.21 - 0.32 |
| Total cholesterol in HDL2 (mmol/L)                          | 469    | 0.30 | 0.22 - 0.38 | 468 | 0.30  | 0.21 - 0.38 | 518 | 0.25 | 0.16 - 0.32  | 517 | 0.24 | 0.16 - 0.32 | 987 | 0.28 | 0.22 - 0.33 | 985 | 0.27 | 0.21 - 0.33 |
| Total cholesterol in HDL3 (mmol/L)                          | 469    | 0.25 | 0.16 - 0.33 | 468 | 0.24  | 0.16 - 0.33 | 518 | 0.25 | 0.16 - 0.33  | 517 | 0.24 | 0.16 - 0.32 | 987 | 0.25 | 0.19 - 0.31 | 985 | 0.24 | 0.18 - 0.30 |
| Esterified cholesterol (mmol/L)                             | 465    | 0.28 | 0.19 - 0.36 | 464 | 0.27  | 0.19 - 0.35 | 518 | 0.32 | 0.24 - 0.39  | 517 | 0.32 | 0.24 - 0.39 | 983 | 0.30 | 0.24 - 0.35 | 981 | 0.30 | 0.24 - 0.35 |
| Free cholesterol (mmol/L)                                   | 465    | 0.26 | 0.18 - 0.34 | 464 | 0.26  | 0.17 - 0.34 | 518 | 0.32 | 0.24 - 0.40  | 517 | 0.33 | 0.25 - 0.40 | 983 | 0.30 | 0.24 - 0.35 | 981 | 0.29 | 0.24 - 0.35 |
| <b>Glycerides and phospholipids</b>                         |        |      |             |     |       |             |     |      |              |     |      |             |     |      |             |     |      |             |
| Serum total triglycerides (mmol/L)*                         | 469    | 0.28 | 0.20 - 0.36 | 468 | 0.28  | 0.19 - 0.36 | 518 | 0.29 | 0.21 - 0.37  | 517 | 0.28 | 0.20 - 0.36 | 987 | 0.29 | 0.23 - 0.35 | 985 | 0.28 | 0.23 - 0.34 |
| Triglycerides in VLDL (mmol/L)*                             | 469    | 0.30 | 0.22 - 0.38 | 468 | 0.29  | 0.21 - 0.38 | 518 | 0.28 | 0.20 - 0.36  | 517 | 0.27 | 0.19 - 0.35 | 987 | 0.29 | 0.23 - 0.35 | 985 | 0.28 | 0.22 - 0.34 |
| Triglycerides in LDL (mmol/L)                               | 469    | 0.19 | 0.10 - 0.28 | 468 | 0.19  | 0.10 - 0.28 | 518 | 0.26 | 0.18 - 0.34  | 517 | 0.26 | 0.18 - 0.34 | 987 | 0.23 | 0.17 - 0.29 | 985 | 0.23 | 0.17 - 0.29 |
| Triglycerides in HDL (mmol/L)                               | 469    | 0.21 | 0.12 - 0.30 | 468 | 0.21  | 0.13 - 0.30 | 518 | 0.26 | 0.18 - 0.34  | 517 | 0.25 | 0.17 - 0.33 | 987 | 0.24 | 0.18 - 0.30 | 985 | 0.24 | 0.18 - 0.29 |
| Total phosphoglycerides (mmol/L)                            | 465    | 0.26 | 0.17 - 0.34 | 464 | 0.26  | 0.17 - 0.34 | 518 | 0.26 | 0.17 - 0.34  | 517 | 0.26 | 0.18 - 0.34 | 983 | 0.26 | 0.20 - 0.32 | 981 | 0.26 | 0.20 - 0.32 |
| Ratio of triglycerides to phosphoglycerides                 | 465    | 0.23 | 0.15 - 0.32 | 464 | 0.23  | 0.14 - 0.32 | 518 | 0.26 | 0.18 - 0.34  | 517 | 0.25 | 0.17 - 0.33 | 983 | 0.25 | 0.20 - 0.31 | 981 | 0.25 | 0.19 - 0.30 |
| Phosphatidylcholine & other cholines (mmol/L)               | 465    | 0.27 | 0.18 - 0.35 | 464 | 0.27  | 0.18 - 0.35 | 518 | 0.25 | 0.17 - 0.33  | 517 | 0.25 | 0.17 - 0.33 | 983 | 0.26 | 0.20 - 0.32 | 981 | 0.26 | 0.20 - 0.32 |
| Sphingomyelin (mmol/L)                                      | 465    | 0.23 | 0.15 - 0.32 | 464 | 0.23  | 0.15 - 0.32 | 518 | 0.29 | 0.21 - 0.37  | 517 | 0.29 | 0.21 - 0.37 | 983 | 0.27 | 0.21 - 0.32 | 981 | 0.26 | 0.20 - 0.32 |
| Total cholines (mmol/L)                                     | 465    | 0.27 | 0.18 - 0.35 | 464 | 0.27  | 0.18 - 0.35 | 518 | 0.28 | 0.20 - 0.35  | 517 | 0.28 | 0.20 - 0.36 | 983 | 0.27 | 0.21 - 0.33 | 981 | 0.27 | 0.21 - 0.33 |
| <b>Apolipoproteins</b>                                      |        |      |             |     |       |             |     |      |              |     |      |             |     |      |             |     |      |             |
| Apolipoprotein A1 (g/L)                                     | 469    | 0.28 | 0.20 - 0.36 | 468 | 0.28  | 0.19 - 0.36 | 518 | 0.26 | 0.18 - 0.34  | 517 | 0.26 | 0.18 - 0.34 | 987 | 0.27 | 0.21 - 0.33 | 985 | 0.27 | 0.21 - 0.32 |
| Apolipoprotein B (g/L)                                      | 469    | 0.26 | 0.18 - 0.35 | 468 | 0.26  | 0.17 - 0.34 | 517 | 0.30 | 0.22 - 0.38  | 516 | 0.30 | 0.22 - 0.38 | 986 | 0.29 | 0.23 - 0.35 | 984 | 0.29 | 0.23 - 0.35 |
| Ratio of apolipoprotein B to apolipoprotein AI              | 469    | 0.28 | 0.20 - 0.36 | 468 | 0.27  | 0.19 - 0.35 | 517 | 0.25 | 0.17 - 0.33  | 516 | 0.24 | 0.16 - 0.32 | 986 | 0.27 | 0.21 - 0.33 | 984 | 0.26 | 0.20 - 0.32 |
| <b>Fatty acids</b>                                          |        |      |             |     |       |             |     |      |              |     |      |             |     |      |             |     |      |             |
| Total fatty acids (mmol/L)                                  | 462    | 0.22 | 0.13 - 0.30 | 461 | 0.23  | 0.14 - 0.31 | 517 | 0.31 | 0.23 - 0.39  | 516 | 0.31 | 0.23 - 0.39 | 979 | 0.27 | 0.22 - 0.33 | 977 | 0.28 | 0.22 - 0.33 |
| Estimated degree of unsaturation                            | 462    | 0.30 | 0.22 - 0.38 | 461 | 0.30  | 0.21 - 0.38 | 517 | 0.27 | 0.19 - 0.35  | 516 | 0.25 | 0.17 - 0.33 | 979 | 0.29 | 0.23 - 0.34 | 977 | 0.28 | 0.22 - 0.33 |
| 22:6, docosahexaenoic acid (mmol/L)                         | 462    | 0.19 | 0.10 - 0.28 | 461 | 0.19  | 0.10 - 0.28 | 517 | 0.26 | 0.18 - 0.34  | 516 | 0.27 | 0.19 - 0.35 | 979 | 0.23 | 0.17 - 0.29 | 977 | 0.23 | 0.17 - 0.29 |
| 18:2, linoleic acid (mmol/L)                                | 462    | 0.22 | 0.13 - 0.31 | 461 | 0.23  | 0.15 - 0.32 | 517 | 0.27 | 0.19 - 0.35  | 516 | 0.27 | 0.19 - 0.35 | 979 | 0.25 | 0.19 - 0.31 | 977 | 0.26 | 0.20 - 0.32 |
| Omega3 fatty acids (mmol/L)                                 | 462    | 0.20 | 0.11 - 0.29 | 461 | 0.21  | 0.12 - 0.30 | 517 | 0.34 | 0.27 - 0.42  | 516 | 0.34 | 0.26 - 0.41 | 979 | 0.27 | 0.21 - 0.33 | 977 | 0.27 | 0.21 - 0.33 |
| Omega6 fatty acids (mmol/L)                                 | 462    | 0.23 | 0.14 - 0.31 | 461 | 0.24  | 0.16 - 0.33 | 517 | 0.31 | 0.23 - 0.38  | 516 | 0.31 | 0.23 - 0.38 | 979 | 0.27 | 0.21 - 0.33 | 977 | 0.28 | 0.22 - 0.33 |
| Polysat. fatty acids (mmol/L)                               | 462    | 0.23 | 0.14 - 0.31 | 461 | 0.24  | 0.15 - 0.33 | 517 | 0.32 | 0.24 - 0.39  | 516 | 0.32 | 0.24 - 0.39 | 979 | 0.28 | 0.22 - 0.33 | 977 | 0.28 | 0.22 - 0.34 |
| Monosat. fatty acids; 16:1, 18:1 (mmol/L)                   | 462    | 0.24 | 0.15 - 0.33 | 461 | 0.24  | 0.16 - 0.33 | 517 | 0.33 | 0.25 - 0.40  | 516 | 0.32 | 0.24 - 0.39 | 979 | 0.29 | 0.24 - 0.35 | 977 | 0.29 | 0.23 - 0.35 |
| Saturated fatty acids (mmol/L)                              | 462    | 0.21 | 0.12 - 0.29 | 461 | 0.21  | 0.12 - 0.30 | 517 | 0.29 | 0.21 - 0.37  | 516 | 0.29 | 0.21 - 0.37 | 979 | 0.26 | 0.20 - 0.32 | 977 | 0.26 | 0.20 - 0.32 |
| <b>Fatty acid ratios</b>                                    |        |      |             |     |       |             |     |      |              |     |      |             |     |      |             |     |      |             |
| Ratio of 22:6 docosahexaenoic acid to total fatty acids (%) | 462    | 0.31 | 0.22 - 0.39 | 461 | 0.29  | 0.21 - 0.38 | 517 | 0.35 | 0.27 - 0.42  | 516 | 0.33 | 0.25 - 0.41 | 979 | 0.33 | 0.27 - 0.39 | 977 | 0.31 | 0.25 - 0.37 |
| Ratio of 18:2 linoleic acid to total fatty acids (%)        | 462    | 0.13 | 0.04 - 0.22 | 461 | 0.13  | 0.03 - 0.21 | 517 | 0.20 | 0.11 - 0.28  | 516 | 0.19 | 0.10 - 0.27 | 979 | 0.17 | 0.11 - 0.23 | 977 | 0.16 | 0.10 - 0.22 |
| Ratio of omega3 fatty acids to total fatty acids (%)        | 462    | 0.32 | 0.24 - 0.40 | 461 | 0.33  | 0.24 - 0.40 | 517 | 0.40 | 0.33 - 0.47  | 516 | 0.38 | 0.30 - 0.45 | 979 | 0.36 | 0.31 - 0.41 | 977 | 0.35 | 0.29 - 0.40 |
| Ratio of omega6 fatty acids to total fatty acids (%)        | 462    | 0.23 | 0.15 - 0.32 | 461 | 0.23  | 0.14 - 0.32 | 517 | 0.25 | 0.17 - 0.33  | 516 | 0.24 | 0.15 - 0.32 | 979 | 0.24 | 0.18 - 0.30 | 977 | 0.24 | 0.18 - 0.30 |
| Ratio of polysat. fatty acids to total fatty acids (%)      | 462    | 0.27 | 0.19 - 0.36 | 461 | 0.27  | 0.18 - 0.35 | 517 | 0.28 | 0.20 - 0.36  | 516 |      |             |     |      |             |     |      |             |

Supplementary table 6: Parent-child concordance; correlation and partial correlations between all parents and their sons, daughters and all children.

| Metabolic subgroup                                          | All Parents |      |             |     |      |             |     |      |             |     |              |             |      |      |             |      |      |             |
|-------------------------------------------------------------|-------------|------|-------------|-----|------|-------------|-----|------|-------------|-----|--------------|-------------|------|------|-------------|------|------|-------------|
|                                                             | Boys        |      |             |     |      | Girls       |     |      |             |     | All Children |             |      |      |             |      |      |             |
|                                                             | n           | CC   | 95% CI      | n   | PCC# | 95% CI      | n   | CC   | 95% CI      | n   | PCC#         | 95% CI      | n    | CC   | 95% CI      |      |      |             |
| <b>Lipoprotein subclass lipids</b>                          |             |      |             |     |      |             |     |      |             |     |              |             |      |      |             |      |      |             |
| Total lipids in chylomicrons & ex.large VLDL (mmol/L)*      | 547         | 0.22 | 0.14 - 0.30 | 544 | 0.22 | 0.14 - 0.30 | 586 | 0.20 | 0.12 - 0.28 | 585 | 0.19         | 0.11 - 0.27 | 1133 | 0.22 | 0.16 - 0.27 | 1129 | 0.21 | 0.16 - 0.27 |
| Total lipids in very large VLDL (mmol/L)*                   | 547         | 0.23 | 0.15 - 0.31 | 544 | 0.23 | 0.15 - 0.31 | 586 | 0.17 | 0.10 - 0.25 | 585 | 0.17         | 0.09 - 0.24 | 1133 | 0.21 | 0.15 - 0.26 | 1129 | 0.20 | 0.15 - 0.26 |
| Total lipids in large VLDL (mmol/L)*                        | 547         | 0.20 | 0.12 - 0.28 | 544 | 0.20 | 0.12 - 0.28 | 586 | 0.20 | 0.12 - 0.28 | 585 | 0.18         | 0.10 - 0.26 | 1133 | 0.20 | 0.15 - 0.26 | 1129 | 0.19 | 0.13 - 0.25 |
| Total lipids in medium VLDL (mmol/L)                        | 547         | 0.27 | 0.19 - 0.35 | 544 | 0.26 | 0.18 - 0.34 | 586 | 0.25 | 0.17 - 0.32 | 585 | 0.23         | 0.16 - 0.31 | 1133 | 0.26 | 0.21 - 0.31 | 1129 | 0.25 | 0.19 - 0.30 |
| Total lipids in small VLDL (mmol/L)                         | 547         | 0.27 | 0.19 - 0.34 | 544 | 0.26 | 0.18 - 0.33 | 586 | 0.26 | 0.18 - 0.33 | 585 | 0.25         | 0.17 - 0.32 | 1133 | 0.26 | 0.21 - 0.32 | 1129 | 0.25 | 0.20 - 0.31 |
| Total lipids in very small VLDL (mmol/L)                    | 547         | 0.23 | 0.15 - 0.31 | 544 | 0.23 | 0.14 - 0.30 | 586 | 0.25 | 0.17 - 0.33 | 585 | 0.26         | 0.18 - 0.33 | 1133 | 0.25 | 0.19 - 0.30 | 1129 | 0.24 | 0.19 - 0.30 |
| Total lipids in LDL (mmol/L)                                | 547         | 0.28 | 0.20 - 0.35 | 544 | 0.26 | 0.19 - 0.34 | 586 | 0.29 | 0.21 - 0.36 | 585 | 0.29         | 0.22 - 0.36 | 1133 | 0.29 | 0.23 - 0.34 | 1129 | 0.28 | 0.23 - 0.33 |
| Total lipids in large LDL (mmol/L)                          | 547         | 0.28 | 0.20 - 0.36 | 544 | 0.27 | 0.19 - 0.35 | 586 | 0.29 | 0.21 - 0.36 | 585 | 0.29         | 0.21 - 0.36 | 1133 | 0.29 | 0.23 - 0.34 | 1129 | 0.28 | 0.23 - 0.34 |
| Total lipids in medium LDL (mmol/L)                         | 547         | 0.29 | 0.21 - 0.36 | 544 | 0.28 | 0.20 - 0.35 | 586 | 0.28 | 0.21 - 0.36 | 585 | 0.28         | 0.21 - 0.36 | 1133 | 0.28 | 0.23 - 0.34 | 1129 | 0.28 | 0.23 - 0.33 |
| Total lipids in small LDL (mmol/L)                          | 547         | 0.28 | 0.20 - 0.35 | 544 | 0.27 | 0.19 - 0.35 | 586 | 0.28 | 0.20 - 0.35 | 585 | 0.28         | 0.20 - 0.35 | 1133 | 0.28 | 0.22 - 0.33 | 1129 | 0.27 | 0.22 - 0.33 |
| Total lipids in very large HDL (mmol/L)                     | 547         | 0.29 | 0.21 - 0.37 | 544 | 0.28 | 0.20 - 0.36 | 586 | 0.29 | 0.21 - 0.36 | 585 | 0.28         | 0.21 - 0.36 | 1133 | 0.29 | 0.24 - 0.34 | 1129 | 0.28 | 0.23 - 0.33 |
| Total lipids in large HDL (mmol/L)                          | 547         | 0.29 | 0.21 - 0.36 | 544 | 0.27 | 0.20 - 0.35 | 586 | 0.24 | 0.17 - 0.32 | 585 | 0.24         | 0.16 - 0.31 | 1133 | 0.27 | 0.21 - 0.32 | 1129 | 0.25 | 0.20 - 0.31 |
| Total lipids in medium HDL (mmol/L)                         | 547         | 0.15 | 0.07 - 0.24 | 544 | 0.14 | 0.06 - 0.23 | 586 | 0.10 | 0.02 - 0.18 | 585 | 0.10         | 0.02 - 0.18 | 1133 | 0.12 | 0.07 - 0.18 | 1129 | 0.12 | 0.06 - 0.18 |
| Total lipids in small HDL (mmol/L)                          | 547         | 0.19 | 0.10 - 0.27 | 544 | 0.18 | 0.10 - 0.26 | 586 | 0.18 | 0.10 - 0.26 | 585 | 0.18         | 0.10 - 0.26 | 1133 | 0.18 | 0.12 - 0.23 | 1129 | 0.18 | 0.12 - 0.23 |
| <b>Lipoprotein particle size</b>                            |             |      |             |     |      |             |     |      |             |     |              |             |      |      |             |      |      |             |
| Mean diameter for VLDL particles (nm)                       | 547         | 0.29 | 0.21 - 0.36 | 544 | 0.28 | 0.20 - 0.36 | 586 | 0.22 | 0.14 - 0.29 | 585 | 0.21         | 0.13 - 0.28 | 1133 | 0.25 | 0.20 - 0.31 | 1129 | 0.24 | 0.19 - 0.30 |
| Mean diameter for LDL particles (nm)                        | 547         | 0.19 | 0.11 - 0.27 | 544 | 0.19 | 0.11 - 0.27 | 586 | 0.27 | 0.19 - 0.34 | 585 | 0.27         | 0.20 - 0.35 | 1133 | 0.23 | 0.17 - 0.28 | 1129 | 0.23 | 0.17 - 0.28 |
| Mean diameter for HDL particles (nm)                        | 547         | 0.31 | 0.23 - 0.38 | 544 | 0.30 | 0.22 - 0.37 | 586 | 0.30 | 0.22 - 0.37 | 585 | 0.29         | 0.22 - 0.36 | 1133 | 0.30 | 0.25 - 0.35 | 1129 | 0.29 | 0.24 - 0.35 |
| <b>Cholesterol</b>                                          |             |      |             |     |      |             |     |      |             |     |              |             |      |      |             |      |      |             |
| Serum total cholesterol (mmol/L)                            | 547         | 0.28 | 0.20 - 0.36 | 544 | 0.27 | 0.19 - 0.35 | 586 | 0.31 | 0.24 - 0.38 | 585 | 0.31         | 0.24 - 0.39 | 1133 | 0.30 | 0.24 - 0.35 | 1129 | 0.29 | 0.24 - 0.34 |
| Total cholesterol in VLDL (mmol/L)                          | 547         | 0.26 | 0.18 - 0.34 | 544 | 0.26 | 0.18 - 0.33 | 586 | 0.26 | 0.18 - 0.33 | 585 | 0.25         | 0.17 - 0.32 | 1133 | 0.26 | 0.21 - 0.32 | 1129 | 0.25 | 0.20 - 0.31 |
| Remnant cholesterol (nonHDL, nonLDL cholesterol) (mmol/L)   | 547         | 0.27 | 0.19 - 0.34 | 544 | 0.26 | 0.18 - 0.34 | 586 | 0.28 | 0.20 - 0.35 | 585 | 0.28         | 0.20 - 0.35 | 1133 | 0.27 | 0.22 - 0.33 | 1129 | 0.27 | 0.21 - 0.32 |
| Total cholesterol in LDL (mmol/L)                           | 547         | 0.29 | 0.21 - 0.36 | 544 | 0.28 | 0.20 - 0.36 | 586 | 0.28 | 0.21 - 0.35 | 585 | 0.28         | 0.21 - 0.35 | 1133 | 0.29 | 0.23 - 0.34 | 1129 | 0.28 | 0.23 - 0.34 |
| Total cholesterol in HDL (mmol/L)                           | 547         | 0.27 | 0.19 - 0.35 | 544 | 0.25 | 0.17 - 0.33 | 586 | 0.22 | 0.14 - 0.29 | 585 | 0.21         | 0.13 - 0.28 | 1133 | 0.24 | 0.19 - 0.30 | 1129 | 0.23 | 0.17 - 0.28 |
| Total cholesterol in LDL3 (mmol/L)                          | 547         | 0.27 | 0.19 - 0.34 | 544 | 0.25 | 0.17 - 0.33 | 586 | 0.21 | 0.14 - 0.29 | 585 | 0.20         | 0.13 - 0.28 | 1133 | 0.24 | 0.18 - 0.29 | 1129 | 0.23 | 0.17 - 0.28 |
| Total cholesterol in HDL3 (mmol/L)                          | 547         | 0.25 | 0.17 - 0.33 | 544 | 0.23 | 0.15 - 0.31 | 586 | 0.23 | 0.15 - 0.31 | 585 | 0.22         | 0.15 - 0.30 | 1133 | 0.24 | 0.19 - 0.30 | 1129 | 0.23 | 0.17 - 0.28 |
| Esterified cholesterol (mmol/L)                             | 543         | 0.28 | 0.20 - 0.36 | 540 | 0.27 | 0.19 - 0.35 | 584 | 0.31 | 0.24 - 0.38 | 583 | 0.31         | 0.24 - 0.38 | 1127 | 0.30 | 0.24 - 0.35 | 1123 | 0.29 | 0.24 - 0.34 |
| Free cholesterol (mmol/L)                                   | 543         | 0.27 | 0.19 - 0.34 | 540 | 0.26 | 0.18 - 0.33 | 584 | 0.32 | 0.24 - 0.39 | 583 | 0.32         | 0.24 - 0.39 | 1127 | 0.29 | 0.24 - 0.35 | 1123 | 0.29 | 0.23 - 0.34 |
| <b>Glycerides and phospholipids</b>                         |             |      |             |     |      |             |     |      |             |     |              |             |      |      |             |      |      |             |
| Serum total triglycerides (mmol/L)*                         | 547         | 0.28 | 0.20 - 0.35 | 544 | 0.27 | 0.19 - 0.34 | 586 | 0.25 | 0.17 - 0.32 | 585 | 0.24         | 0.16 - 0.31 | 1133 | 0.26 | 0.21 - 0.32 | 1129 | 0.25 | 0.20 - 0.31 |
| Triglycerides in VLDL (mmol/L)*                             | 547         | 0.28 | 0.20 - 0.36 | 544 | 0.28 | 0.20 - 0.35 | 586 | 0.23 | 0.15 - 0.30 | 585 | 0.21         | 0.14 - 0.29 | 1133 | 0.26 | 0.20 - 0.31 | 1129 | 0.25 | 0.19 - 0.30 |
| Triglycerides in LDL (mmol/L)                               | 547         | 0.20 | 0.12 - 0.28 | 544 | 0.19 | 0.11 - 0.27 | 586 | 0.27 | 0.19 - 0.34 | 585 | 0.27         | 0.19 - 0.34 | 1133 | 0.24 | 0.18 - 0.29 | 1129 | 0.23 | 0.18 - 0.29 |
| Triglycerides in HDL (mmol/L)                               | 547         | 0.25 | 0.17 - 0.33 | 544 | 0.25 | 0.17 - 0.33 | 586 | 0.27 | 0.20 - 0.35 | 585 | 0.27         | 0.19 - 0.34 | 1133 | 0.26 | 0.21 - 0.32 | 1129 | 0.26 | 0.20 - 0.31 |
| Total phosphoglycerides (mmol/L)                            | 543         | 0.28 | 0.20 - 0.36 | 540 | 0.27 | 0.19 - 0.35 | 584 | 0.27 | 0.19 - 0.34 | 583 | 0.27         | 0.20 - 0.35 | 1127 | 0.27 | 0.22 - 0.33 | 1123 | 0.27 | 0.22 - 0.32 |
| Ratio of triglycerides to phosphoglycerides                 | 543         | 0.23 | 0.15 - 0.31 | 540 | 0.22 | 0.14 - 0.30 | 584 | 0.21 | 0.13 - 0.28 | 583 | 0.19         | 0.11 - 0.27 | 1127 | 0.22 | 0.16 - 0.27 | 1123 | 0.21 | 0.15 - 0.26 |
| Phosphatidylcholine & other choline (mmol/L)                | 542         | 0.28 | 0.20 - 0.36 | 539 | 0.27 | 0.19 - 0.35 | 584 | 0.26 | 0.19 - 0.34 | 583 | 0.26         | 0.19 - 0.34 | 1126 | 0.27 | 0.21 - 0.32 | 1122 | 0.27 | 0.21 - 0.32 |
| Sphingomyelin (mmol/L)                                      | 542         | 0.23 | 0.15 - 0.31 | 539 | 0.22 | 0.13 - 0.30 | 584 | 0.28 | 0.21 - 0.36 | 583 | 0.28         | 0.21 - 0.36 | 1126 | 0.26 | 0.20 - 0.31 | 1122 | 0.25 | 0.19 - 0.30 |
| Total choline (mmol/L)                                      | 542         | 0.27 | 0.19 - 0.35 | 539 | 0.27 | 0.19 - 0.34 | 584 | 0.29 | 0.21 - 0.36 | 583 | 0.29         | 0.21 - 0.36 | 1126 | 0.28 | 0.22 - 0.33 | 1122 | 0.27 | 0.22 - 0.33 |
| <b>Apolipoproteins</b>                                      |             |      |             |     |      |             |     |      |             |     |              |             |      |      |             |      |      |             |
| Apolipoprotein A1 (g/L)                                     | 547         | 0.26 | 0.18 - 0.34 | 544 | 0.25 | 0.17 - 0.33 | 586 | 0.25 | 0.17 - 0.33 | 585 | 0.25         | 0.17 - 0.32 | 1133 | 0.25 | 0.20 - 0.31 | 1129 | 0.24 | 0.19 - 0.30 |
| Apolipoprotein B (g/L)                                      | 547         | 0.27 | 0.19 - 0.35 | 544 | 0.27 | 0.19 - 0.34 | 585 | 0.28 | 0.20 - 0.35 | 584 | 0.28         | 0.20 - 0.35 | 1132 | 0.28 | 0.23 - 0.33 | 1128 | 0.28 | 0.22 - 0.33 |
| Ratio of apolipoprotein B to apolipoprotein A1              | 547         | 0.26 | 0.18 - 0.33 | 544 | 0.25 | 0.17 - 0.33 | 585 | 0.21 | 0.13 - 0.29 | 584 | 0.20         | 0.12 - 0.28 | 1132 | 0.23 | 0.18 - 0.29 | 1128 | 0.23 | 0.17 - 0.28 |
| <b>Fatty acids</b>                                          |             |      |             |     |      |             |     |      |             |     |              |             |      |      |             |      |      |             |
| Total fatty acids (mmol/L)                                  | 537         | 0.26 | 0.18 - 0.33 | 534 | 0.26 | 0.18 - 0.34 | 583 | 0.30 | 0.22 - 0.37 | 582 | 0.29         | 0.22 - 0.37 | 1120 | 0.28 | 0.23 - 0.33 | 1116 | 0.28 | 0.22 - 0.33 |
| Estimated degree of unsaturation                            | 537         | 0.30 | 0.22 - 0.37 | 534 | 0.30 | 0.22 - 0.37 | 583 | 0.24 | 0.17 - 0.32 | 582 | 0.23         | 0.15 - 0.30 | 1120 | 0.27 | 0.21 - 0.32 | 1116 | 0.26 | 0.20 - 0.31 |
| 22:6, docosahexaenoic acid (mmol/L)                         | 537         | 0.23 | 0.15 - 0.31 | 534 | 0.22 | 0.14 - 0.30 | 583 | 0.33 | 0.26 - 0.40 | 582 | 0.33         | 0.25 - 0.40 | 1120 | 0.28 | 0.23 - 0.34 | 1116 | 0.27 | 0.22 - 0.33 |
| 18:2, linoleic acid (mmol/L)                                | 537         | 0.24 | 0.16 - 0.32 | 534 | 0.26 | 0.17 - 0.33 | 583 | 0.27 | 0.19 - 0.34 | 582 | 0.27         | 0.19 - 0.34 | 1120 | 0.26 | 0.21 - 0.32 | 1116 | 0.26 | 0.21 - 0.32 |
| Omega3 fatty acids (mmol/L)                                 | 537         | 0.24 | 0.16 - 0.32 | 534 | 0.24 | 0.16 - 0.32 | 583 | 0.34 | 0.27 - 0.41 | 582 | 0.34         | 0.27 - 0.41 | 1120 | 0.29 | 0.23 - 0.34 | 1116 | 0.29 | 0.23 - 0.34 |
| Omega6 fatty acids (mmol/L)                                 | 537         | 0.26 | 0.18 - 0.33 | 534 | 0.26 | 0.18 - 0.34 | 583 | 0.30 | 0.23 - 0.38 | 582 | 0.30         | 0.23 - 0.38 | 1120 | 0.28 | 0.23 - 0.34 | 1116 | 0.28 | 0.23 - 0.34 |
| Polysat. fatty acids (mmol/L)                               | 537         | 0.26 | 0.17 - 0.33 | 534 | 0.26 | 0.18 - 0.34 | 583 | 0.31 | 0.24 - 0.39 | 582 | 0.31         | 0.24 - 0.39 | 1120 | 0.29 | 0.23 - 0.34 | 1116 | 0.29 | 0.23 - 0.34 |
| Monosat. fatty acids; 16:1, 18:1 (mmol/L)                   | 537         | 0.27 | 0.19 - 0.35 | 534 | 0.27 | 0.19 - 0.35 | 583 | 0.30 | 0.22 - 0.37 | 582 | 0.29         | 0.22 - 0.37 | 1120 | 0.29 | 0.24 - 0.34 | 1116 | 0.28 | 0.23 - 0.34 |
| Saturated fatty acids (mmol/L)                              | 537         | 0.25 | 0.17 - 0.33 | 534 | 0.25 | 0.17 - 0.33 | 583 | 0.28 | 0.20 - 0.35 | 582 | 0.28         | 0.20 - 0.35 | 1120 | 0.27 | 0.21 - 0.32 | 1116 | 0.27 | 0.21 - 0.32 |
| <b>Fatty acid ratios</b>                                    |             |      |             |     |      |             |     |      |             |     |              |             |      |      |             |      |      |             |
| Ratio of 22:6 docosahexaenoic acid to total fatty acids (%) | 537         | 0.31 | 0.23 - 0.38 | 534 | 0.30 | 0.22 - 0.37 | 583 | 0.33 | 0.26 - 0.40 | 582 | 0.32         | 0.24 - 0.39 | 1120 | 0.32 | 0.27 - 0.37 | 1116 | 0.31 | 0.25 - 0.36 |
| Ratio of 18:2 linoleic acid to total fatty acids (%)        | 537         | 0.15 | 0.07 - 0.23 | 534 | 0.15 | 0.06 - 0.23 | 583 | 0.18 | 0.10 - 0.26 | 582 | 0.17         | 0.09 - 0.25 | 1120 | 0.17 | 0.11 - 0.23 | 1116 | 0.16 | 0.11 - 0.22 |
| Ratio of omega3 fatty acids to total fatty acids (%)        | 537         | 0.32 | 0.24 - 0.39 | 534 | 0.32 | 0.24 - 0.39 | 583 | 0.40 | 0.33 - 0.47 | 582 | 0.39         | 0.32 - 0.46 | 1120 | 0.36 | 0.31 - 0.41 | 1116 | 0.35 | 0.30 - 0.40 |
| Ratio of omega6 fatty acids to total fatty acids (%)        | 537         | 0.24 | 0.16 - 0.32 | 534 | 0.24 | 0.16 - 0.32 | 583 | 0.23 | 0.15 - 0.30 | 582 | 0.22         | 0.14 - 0.29 | 1120 | 0.24 | 0.18 - 0.29 | 1116 | 0.23 | 0.17 - 0.28 |
| Ratio of polysat. fatty acids to total fatty acids (%)      | 537         |      |             |     |      |             |     |      |             |     |              |             |      |      |             |      |      |             |

## STROBE Statement—checklist of items that should be included in reports of observational studies

**Paper title:** Metabolomics: Population epidemiology and concordance in 11-12 year old

Australians and their parents

**Person completing checklist:** Susan Ellul

|                              | Item No | Recommendation                                                                                                                                                                                                                                                                                                                                                                                                                                                                   | Page number | Line number                                               |
|------------------------------|---------|----------------------------------------------------------------------------------------------------------------------------------------------------------------------------------------------------------------------------------------------------------------------------------------------------------------------------------------------------------------------------------------------------------------------------------------------------------------------------------|-------------|-----------------------------------------------------------|
| <b>Title and abstract</b>    | 1       | (a) Indicate the study's design with a commonly used term in the title or the abstract                                                                                                                                                                                                                                                                                                                                                                                           | 2           | 14-15                                                     |
|                              |         | (b) Provide in the abstract an informative and balanced summary of what was done and what was found                                                                                                                                                                                                                                                                                                                                                                              | 2           | 9-13<br>26-32                                             |
| <b>Introduction</b>          |         |                                                                                                                                                                                                                                                                                                                                                                                                                                                                                  |             |                                                           |
| Background/rationale         | 2       | Explain the scientific background and rationale for the investigation being reported                                                                                                                                                                                                                                                                                                                                                                                             | 4-5         | Pg 4 (3-9, 21-22, 31-32, 33-35)<br>Pg 5 (3-4)             |
| Objectives                   | 3       | State specific objectives, including any prespecified hypotheses                                                                                                                                                                                                                                                                                                                                                                                                                 | 5           | 5-7                                                       |
| <b>Methods</b>               |         |                                                                                                                                                                                                                                                                                                                                                                                                                                                                                  |             |                                                           |
| Study design                 | 4       | Present key elements of study design early in the paper                                                                                                                                                                                                                                                                                                                                                                                                                          | 5           | 10-17                                                     |
| Setting                      | 5       | Describe the setting, locations, and relevant dates, including periods of recruitment, exposure, follow-up, and data collection                                                                                                                                                                                                                                                                                                                                                  | 5-6         | Pg 5 (33-35)<br>Pg 6 (1-27)                               |
| Participants                 | 6       | (a) <i>Cohort study</i> —Give the eligibility criteria, and the sources and methods of selection of participants. Describe methods of follow-up<br><del><i>Case control study</i>—Give the eligibility criteria, and the sources and methods of case ascertainment and control selection. Give the rationale for the choice of cases and controls</del><br><i>Cross-sectional study</i> —Give the eligibility criteria, and the sources and methods of selection of participants | 5           | 18-26                                                     |
|                              |         | (b) <del><i>Cohort study</i>—For matched studies, give matching criteria and number of exposed and unexposed</del><br><del><i>Case control study</i>—For matched studies, give matching criteria and the number of controls per case</del>                                                                                                                                                                                                                                       |             |                                                           |
| Variables                    | 7       | Clearly define all outcomes, exposures, predictors, potential confounders, and effect modifiers. Give diagnostic criteria, if applicable                                                                                                                                                                                                                                                                                                                                         | 6-8         | Pg 6 (29-36)<br>Pg 7 (1-6, table 1, 15-19)<br>Pg 8 (1-33) |
| Data sources/<br>measurement | 8*      | For each variable of interest, give sources of data and details of methods of assessment (measurement). Describe comparability of assessment methods if there is more than one group                                                                                                                                                                                                                                                                                             | 6-8         | Pg 6 (29-36)<br>Pg 7 (1-6, table 1, 15-19)<br>Pg 8 (1-33) |
| Bias                         | 9       | Describe any efforts to address potential sources of bias                                                                                                                                                                                                                                                                                                                                                                                                                        | 9           | 6-10                                                      |
| Study size                   | 10      | Explain how the study size was arrived at                                                                                                                                                                                                                                                                                                                                                                                                                                        | 10          | 5-14, figure 1                                            |

|                        |    |                                                                                                                              |   |                    |
|------------------------|----|------------------------------------------------------------------------------------------------------------------------------|---|--------------------|
| Quantitative variables | 11 | Explain how quantitative variables were handled in the analyses. If applicable, describe which groupings were chosen and why | 9 | 2-26               |
| Statistical methods    | 12 | (a) Describe all statistical methods, including those used to control for confounding                                        | 9 | 2-26               |
|                        |    | (b) Describe any methods used to examine subgroups and interactions                                                          | 9 | 2-26               |
|                        |    | (c) Explain how missing data were addressed                                                                                  | 9 | 6-10               |
|                        |    | (d) <i>Cohort study</i> —If applicable, explain how loss to follow-up was addressed                                          | 9 | 6-10, 15-17, 20-23 |
|                        |    | <del>(e) <i>Case-control study</i>—If applicable, explain how matching of cases and controls was addressed</del>             |   |                    |
|                        |    | (e) Describe any sensitivity analyses                                                                                        | 9 | 15-17, 20-23       |

| <b>Results</b>   |     |                                                                                                                                                                                                              | <b>Page number</b>                 | <b>Line number</b> |
|------------------|-----|--------------------------------------------------------------------------------------------------------------------------------------------------------------------------------------------------------------|------------------------------------|--------------------|
| Participants     | 13* | (a) Report numbers of individuals at each stage of study—eg numbers potentially eligible, examined for eligibility, confirmed eligible, included in the study, completing follow-up, and analysed            | 10 and figure 1                    | 5-12               |
|                  |     | (b) Give reasons for non-participation at each stage                                                                                                                                                         | 10<br>6<br>figure 1                | 8-12<br>5-6        |
|                  |     | (c) Consider use of a flow diagram                                                                                                                                                                           | figure 1                           |                    |
| Descriptive data | 14* | (a) Give characteristics of study participants (eg demographic, clinical, social) and information on exposures and potential confounders                                                                     | 11<br>(table 2)                    | 2                  |
|                  |     | (b) Indicate number of participants with missing data for each variable of interest                                                                                                                          | figure 1<br>table 2<br>sup Table 1 | 2                  |
|                  |     | (c) <i>Cohort study</i> —Summarise follow-up time (eg, average and total amount)                                                                                                                             | NA                                 |                    |
| Outcome data     | 15* | <i>Cohort study</i> —Report numbers of outcome events or summary measures over time                                                                                                                          | sup table 1                        |                    |
|                  |     | <i>Case-control study</i> —Report numbers in each exposure category, or summary measures of exposure                                                                                                         | NA                                 |                    |
|                  |     | <i>Cross-sectional study</i> —Report numbers of outcome events or summary measures                                                                                                                           | NA                                 |                    |
| Main results     | 16  | (a) Give unadjusted estimates and, if applicable, confounder-adjusted estimates and their precision (eg, 95% confidence interval). Make clear which confounders were adjusted for and why they were included | 12<br>supp tables<br>2-6           | 20-25              |
|                  |     | (b) Report category boundaries when continuous variables were categorized                                                                                                                                    | NA                                 |                    |
|                  |     | (c) If relevant, consider translating estimates of relative risk into absolute risk for a meaningful time period                                                                                             | NA                                 |                    |

|                          |    |                                                                                                                                                                            |                    |                                                            |
|--------------------------|----|----------------------------------------------------------------------------------------------------------------------------------------------------------------------------|--------------------|------------------------------------------------------------|
| Other analyses           | 17 | Report other analyses done—eg analyses of subgroups and interactions, and sensitivity analyses                                                                             | supp tables<br>2-6 |                                                            |
| <b>Discussion</b>        |    |                                                                                                                                                                            |                    |                                                            |
| Key results              | 18 | Summarise key results with reference to study objectives                                                                                                                   | 13                 | 3-10                                                       |
| Limitations              | 19 | Discuss limitations of the study, taking into account sources of potential bias or imprecision. Discuss both direction and magnitude of any potential bias                 | 13                 | 18-28                                                      |
| Interpretation           | 20 | Give a cautious overall interpretation of results considering objectives, limitations, multiplicity of analyses, results from similar studies, and other relevant evidence | 13-16              | Pg 13 (30-32)<br>Pg 14 (all)<br>Pg 15 (all)<br>Pg 16 (1-2) |
| Generalisability         | 21 | Discuss the generalisability (external validity) of the study results                                                                                                      | 13                 | 19-27                                                      |
| <b>Other information</b> |    |                                                                                                                                                                            |                    |                                                            |
| Funding                  | 22 | Give the source of funding and the role of the funders for the present study and, if applicable, for the original study on which the present article is based              | 17-18              | Pg 17 (28-33)<br>Pg 18 (1-3)                               |

\*Give information separately for cases and controls in case-control studies and, if applicable, for exposed and unexposed groups in cohort and cross-sectional studies.

**Note:** An Explanation and Elaboration article discusses each checklist item and gives methodological background and published examples of transparent reporting. The STROBE checklist is best used in conjunction with this article (freely available on the Web sites of PLoS Medicine at <http://www.plosmedicine.org/>, Annals of Internal Medicine at <http://www.annals.org/>, and Epidemiology at <http://www.epidem.com/>). Information on the STROBE Initiative is available at [www.strobe-statement.org](http://www.strobe-statement.org).

# BMJ Open

## Metabolomics: Population epidemiology and concordance in 11-12 year old Australians and their parents

|                                 |                                                                                                                                                                                                                                                                                                                                                                                                                                                                                                                                                                                                                                                                                                                                                                                                                                                                                                                           |
|---------------------------------|---------------------------------------------------------------------------------------------------------------------------------------------------------------------------------------------------------------------------------------------------------------------------------------------------------------------------------------------------------------------------------------------------------------------------------------------------------------------------------------------------------------------------------------------------------------------------------------------------------------------------------------------------------------------------------------------------------------------------------------------------------------------------------------------------------------------------------------------------------------------------------------------------------------------------|
| Journal:                        | <i>BMJ Open</i>                                                                                                                                                                                                                                                                                                                                                                                                                                                                                                                                                                                                                                                                                                                                                                                                                                                                                                           |
| Manuscript ID                   | bmjopen-2017-020900.R1                                                                                                                                                                                                                                                                                                                                                                                                                                                                                                                                                                                                                                                                                                                                                                                                                                                                                                    |
| Article Type:                   | Research                                                                                                                                                                                                                                                                                                                                                                                                                                                                                                                                                                                                                                                                                                                                                                                                                                                                                                                  |
| Date Submitted by the Author:   | 13-Jun-2018                                                                                                                                                                                                                                                                                                                                                                                                                                                                                                                                                                                                                                                                                                                                                                                                                                                                                                               |
| Complete List of Authors:       | Ellul, Susan; Murdoch Children's Research Institute<br>Wake, Melissa; Murdoch Children's Research Institute; University of Auckland, Department of Paediatrics & The Liggins Institute<br>Clifford, Susan; Murdoch Children's Research Institute; The University of Melbourne<br>Lange, Katherine; Murdoch Children's Research Institute<br>Wurtz, Peter; University of Helsinki, Research Programs Unit, Diabetes and Obesity; Nightingale Health Ltd.<br>Juonala, Markus; University of Turku, Department of Medicine<br>Dwyer, Terry; Murdoch Children's Research Institute; The University of Melbourne<br>Carlin, John; Murdoch Children's Research Institute,<br>Burgner, David; Murdoch Children's Research Institute; Monash University, Department of Paediatrics<br>Saffery, Richard; Murdoch Children's Research Institute, Cancer and Disease Epigenetics; University of Melbourne, Department of Paediatrics |
| <b>Primary Subject Heading</b>: | Epidemiology                                                                                                                                                                                                                                                                                                                                                                                                                                                                                                                                                                                                                                                                                                                                                                                                                                                                                                              |
| Secondary Subject Heading:      | Paediatrics, Public health, Diabetes and endocrinology                                                                                                                                                                                                                                                                                                                                                                                                                                                                                                                                                                                                                                                                                                                                                                                                                                                                    |
| Keywords:                       | Metabolomics, Lipids, Reference values, Children, Inheritance patterns, Epidemiologic studies                                                                                                                                                                                                                                                                                                                                                                                                                                                                                                                                                                                                                                                                                                                                                                                                                             |
|                                 |                                                                                                                                                                                                                                                                                                                                                                                                                                                                                                                                                                                                                                                                                                                                                                                                                                                                                                                           |

SCHOLARONE™  
Manuscripts

1 **Metabolomics: Population epidemiology and concordance in 11-12 year old Australians and their**  
2 **parents**

3  
4 **Authors:** Susan Ellul<sup>1</sup>, Melissa Wake<sup>1-3</sup>, Susan A. Clifford<sup>1,2</sup>, Katherine Lange<sup>1</sup>, Peter  
5 Würtz<sup>4,5</sup>, Markus Juonala<sup>6</sup>, Terence Dwyer<sup>1,2,7,8</sup>, John Carlin<sup>1,2</sup>, David Burgner<sup>1,2,9</sup> and  
6 Richard Saffery<sup>1,2</sup>.

7  
8 **Affiliations:** <sup>1</sup>Murdoch Children's Research Institute, Parkville, Victoria, Australia; <sup>2</sup>The  
9 University of Melbourne, Parkville, Victoria, Australia; <sup>3</sup>Dept of Paediatrics and the Liggins  
10 Institute, University of Auckland, Grafton, Auckland, New Zealand; <sup>4</sup>Research Programs  
11 Unit, Diabetes and Obesity, University of Helsinki, Helsinki, Finland; <sup>5</sup>Nightingale Health  
12 Ltd., Helsinki, Finland; <sup>6</sup>Department of Medicine, University of Turku, Finland, <sup>2</sup> Division of  
13 Medicine, Turku University Hospital, Turku, Finland; <sup>7</sup>The George Institute for Global  
14 Health, Nuffield Department of Obstetrics and Gynaecology, University of Oxford, Oxford,  
15 United Kingdom. <sup>8</sup>Institute for Medical Research, University of Tasmania, Hobart, Tasmania,  
16 Australia; <sup>9</sup>Department of Paediatrics, Monash University, Clayton, Victoria, Australia.

17  
18 **Correspondence to:** Professor Melissa Wake,  
19 Murdoch Children's Research Institute  
20 The Royal Children's Hospital  
21 50 Flemington Road, Parkville 3052, VIC Australia.  
22 Telephone: +61 3 9345 5761  
23 Email: melissa.wake@mcri.edu.au

24  
25 **Keywords:** Metabolomics; lipids; inflammation; reference values; parents; children;  
26 inheritance patterns; correlation studies; epidemiologic studies; cross-sectional studies.

27  
28 **Word count: 4270**

29  
30 **Abbreviations:** ApoA-1: Apolipoprotein A-1; Apo B: Apolipoprotein B; BCAA: Branched  
31 chain amino acid; BD: Becton Dickinson; CDC: Centers for Disease Prevention and Control;  
32 CVD: Cardiovascular disease; CPS1: Carbamoyl-phosphate synthase 1; DHA:  
33 Docosahexaenoic acid; DOB: Date of birth; EDTA: Ethylenediaminetetraacetic acid; FDR:  
34 False discovery rate; GlycA: Glycoprotein acetyls; HbA1c: Haemoglobin A1c; HDL: High-  
35 density lipoprotein; HOMA: Homeostatic model assessment; IDL: Intermediate density  
36 lipoprotein; LA: Linoleic acid; LDL: Low-density lipoprotein; LiH: Lithium Heparin; LSAC:



1 Longitudinal Study of Australian Children; MUFA: Monounsaturated fatty acid; NMR:  
2 Nuclear magnetic resonance; PCOS: Polycystic Ovary Syndrome; PUFA: Polyunsaturated  
3 fatty acid; SFA: Saturated fatty acids; SST: serum separating tubes; T2D: Type 2 diabetes;  
4 T2DM: Type 2 diabetes mellitus; VLDL: Very low density lipoprotein; XL: Very large;  
5 XXL: Chylomicrons and extremely large; XS: Very small.

## 6 7 **ABSTRACT**

8  
9 **Objectives:** Nuclear Magnetic Resonance (NMR) metabolomics is high throughput and cost  
10 effective, with the potential to improve the understanding of disease and risk. We examine  
11 the circulating metabolic profile by quantitative NMR metabolomics of a sample of  
12 Australian 11-12 year old children and their parents, describe differences by age and sex, and  
13 explore correlation of metabolites in parent-child dyads.

14 **Design:** The population-based cross-sectional Child Health CheckPoint study nested within  
15 the Longitudinal Study of Australian Children.

16 **Setting:** Blood samples collected from CheckPoint participants at assessment centres in  
17 seven Australian cities and eight regional towns; February 2015-March 2016.

18 **Participants:** 1180 children and 1325 parents provided a blood sample and had  
19 metabolomics data available. This included 1133 parent-child dyads (518 mother-daughter,  
20 469 mother-son, 68 father-daughter, and 78 father-son).

21 **Outcome measures:** 228 metabolic measures were obtained for each participant. We  
22 focused on 74 biomarkers including amino acid species, lipoprotein subclass measures, lipid  
23 measures, fatty acids, measures related to fatty acid saturation, and composite markers of  
24 inflammation and energy homeostasis.

25 **Results:** We identified sex-specific metabolic profiles in children and adults and differences  
26 in the concentration of specific metabolites between childhood and adulthood. In general,  
27 metabolite concentrations were higher in adults than children and sex differences were larger  
28 in adults than in children. Positive correlations were observed for the majority of metabolites  
29 including for isoleucine (CC 0.33, 95% CI 0.27 to 0.38), total cholesterol (CC 0.30, 95% CI  
30 0.24 to 0.35) and omega 6 fatty acids (CC 0.28, 95% CI 0.23 to 0.34) in parent-child  
31 comparisons.

32 **Conclusions:** We describe the serum metabolite profiles from mid-childhood and adulthood  
33 in a population-based sample, together with parent-child concordance. Distinct age- and sex-  
34 specific profiles were observed. These data will be informative for investigation of the  
35 childhood origins of adult non-communicable diseases and for comparative studies in other  
36 populations.

**Strengths and limitations of this study:**

- In a large population-based cohort, venous blood was collected for children and their attending parent on the same day using the same methods
- Rapidly processed, high quality serum samples with standardised metabolomic data generated as a single batch
- Cross-sectional design does not enable longitudinal analysis of specific metabolite species over short term or longer periods of time
- Assessment of paternal associations with offspring metabolite measures is limited by a relatively small sample size compared to mother-child pairs, reducing the precision of estimates
- Factors known to influence metabolomic profile (such as body mass index) were not considered as the aim was to describe the distribution of metabolites in children and their parents.

## 1 INTRODUCTION

2  
3 Metabolomics involves the quantitative analysis of a large number of metabolites and lipids  
4 involved in a diverse range of biochemical pathways.<sup>1</sup> Genetic/gene expression and  
5 environmental exposures are associated with specific metabolic changes across many tissues  
6 and body fluids.<sup>2 3</sup> As such, metabolomics is recognised as a powerful top-down approach to  
7 understanding genetic and environmental influences on health and disease. Metabolomic  
8 profiling also has considerable potential to identify clinically relevant biomarkers for risk  
9 stratification and disease monitoring.

10 Recent advances in nuclear magnetic resonance (NMR) spectroscopy and mass spectrometry  
11 have enabled the simultaneous quantitative measurement of hundreds of metabolites. These  
12 approaches are sufficiently cost effective and high throughput to be applicable to large cohort  
13 studies. For example, NMR metabolomics of serum from the Cardiovascular Risk in Young  
14 Finns Study identified many biomarkers from multiple metabolic pathways reflective of fatty  
15 liver disease.<sup>4</sup> These were also predictive of risk 10 years prior to diagnosis, indicating that  
16 metabolic disruptions precede overt phenotype. Similar population and disease-specific  
17 studies have identified metabolomic profiles associated with a range of exposures and health  
18 outcomes with potential to reveal clinically important biomarkers and information on disease  
19 mechanisms.<sup>5</sup> In addition, specific serum metabolites can also be considered ‘intermediate  
20 phenotypes’ linking genetic risk with disease outcomes.<sup>6 7</sup>

21 Previous research indicates that some blood metabolites change with age, particularly from  
22 mid to late adulthood.<sup>8 9</sup> However, in adults sex appears to be a major driver of variation in  
23 metabolite profile, potentially interacting with age. For example, the effects of sex appeared  
24 to be greater in younger (age 25-35) than older Japanese adults.<sup>10</sup> A study of 26,000 Northern  
25 European adults identified many sex-specific metabolic species at the population level.<sup>9</sup> In  
26 men, several lipid measures begin to rise at early middle age whereas a similar increase is  
27 only observed in females post menopause. This pattern is consistent for all non-HDL  
28 cholesterol measures – very low density lipoprotein (VLDL), intermediate density lipoprotein  
29 (IDL) and low density lipoprotein (LDL) subclass particle concentrations - as well as for  
30 triglycerides.<sup>9</sup> Physiological states such as pregnancy also have consistent and measurable  
31 influence on serum metabolome.<sup>11</sup> However, it remains unclear how the serum metabolome  
32 differs in adults compared to children and by sex particularly in childhood.

33 Moreover, factors regulating the metabolic trajectory from early life to adulthood, the role of  
34 metabolomic profile in health at the population level and the extent to which blood  
35 metabolomic profiles are concordant for parents and children have not been fully explored.  
36 One small study has reported correlations between parents (n=179) and their offspring

(n=255) for a range of cardiometabolic risk factors including standard lipid profile measured using conventional methods; this proved stronger for total cholesterol and LDL cholesterol than for high density lipoprotein (HDL) cholesterol or triglycerides.<sup>12</sup> Considerable evidence exists that the metabolomic profile is regulated, at least in part, by genetic factors<sup>13 14</sup> and is also influenced by dietary and lifestyle factors. Each of these influences is likely to be shared between parents and their offspring to varying degrees, however, parent-child correlations of metabolites from NMR-based platforms have not been reported previously.

Here, we describe (1) the distribution of NMR-based metabolite measures in a population-based cohort of 11-12 year old children and their parents, differences in metabolite concentrations (2) by age (adults compared to children) and (3) by sex in children and adults; and (4) report sex-specific parent-child concordance.

## METHODS

**Study Design:** Details of the initial Longitudinal Study of Australian Children (LSAC) study design and recruitment are outlined elsewhere.<sup>15 16</sup> The LSAC commenced in 2004, when two cohorts (the 'B' and 'K' cohorts, of which the B cohort only was included in the present study) were recruited who have since been followed biennially. The Child Health CheckPoint comprised a detailed cross-sectional assessment of physical health and biomarkers in a population-based national sample of children (age 11-12 years) and their parents between February 2015 to March 2016. The CheckPoint was nested between waves 6 (2014) and 7 (2016) of the LSAC. Further details regarding the CheckPoint study design and methods are available elsewhere.<sup>17 18</sup>

**Participants:** Of the 8,921 families contacted to be part of the LSAC B cohort 5,107 families (57%) agreed to take part in the first wave of data collection in 2004; 4,484 families were retained for Wave 6 in 2014. During the Wave 6 LSAC home visit, B cohort families were introduced to the upcoming Child Health CheckPoint and asked to consent to their contact details being shared with the CheckPoint team. A total of 3,513 families provided permission to receive an information pack by mail and an information and recruitment phone call regarding the CheckPoint study (78% of Wave 6 cohort, 69% of original cohort). Of the families agreeing to receive information about the CheckPoint study, 1,874 families took part (53% of eligible participants, 42% of Wave 6 cohort and 37% of original cohort).

**Ethics and consent:** The CheckPoint data collection protocol was approved by The Royal Children's Hospital (Melbourne, Australia) Human Research Ethics Committee (33225D) and the Australian Institute of Family Studies Ethics Committee (14-26). The attending parent/caregiver provided written informed consent for themselves and their child to

1 participate in the study, and asked to provide optional consent for the collection and use of  
2 biological samples.

3 **Procedure:** The specialised CheckPoint assessment centre sequentially visited seven  
4 Australian cities and eight regional towns between February 2015 and March 2016.<sup>18</sup> Each  
5 participating child attended the centre with one parent or caregiver (usually the biological  
6 mother) at which both participated in a wide range of measures relevant to non-  
7 communicable disease. Those families who could not attend a centre were offered a home  
8 visit. Participants were included in the current analyses if metabolomic data from CheckPoint  
9 were available (figure 1). Venous blood was not available for home-visit participants, but was  
10 collected at all city and most regional assessment centres. Participant pairs were excluded  
11 from the concordance analyses in this study if the attending parent was not the biological  
12 parent.

13 An experienced phlebotomist collected approximately 28mL of blood from the brachial vein  
14 of the non-dominant arm of semi-reclining, semi-fasted participants (at the time of collection,  
15 participants reported when they last ate or drank). Blood was collected sequentially into four  
16 Becton Dickinson (BD) Vacutainer<sup>®</sup> tubes using a butterfly needle so only a single  
17 venepuncture was required. Order of collection was (i) 2.7mL EDTA, (ii) 9mL EDTA, (iii)  
18 9mL serum, (iv) 7.5mL Lithium Heparin. The latter two tubes were immediately inverted 6  
19 times to ensure mixing with anticoagulant, and all tubes were transferred to the on-site  
20 laboratory. Time of collection was scheduled earlier in the visit for parents than for children.

21 Collection tube barcodes were linked to the participant and samples were immediately  
22 transported to an on-site laboratory where they were processed within two hours. Blood  
23 clotting was allowed at room temperature for at least 30 minutes after collection. The sample  
24 tubes were spun at 550g relative centrifugal force for 10 minutes at room temperature and  
25 distributed into 0.5mL aliquots of plasma, serum, buffy coat (lymphocytes), whole blood  
26 and/or an aliquot tube containing a blood clot (1.0mL FluidX screwcap tubes, Cheshire, UK)  
27 and stored immediately at -80°C (Thermo Fisher Scientific, Waltham, USA). Each FluidX  
28 tube contained a unique 2D barcode linked to the original collection tube and participant. As  
29 each assessment centre closed, samples were shipped on dry ice to the Melbourne Children's  
30 Bioresource Centre for long term storage at -80°C (serum, whole blood, plasma, blood clot)  
31 or vapour phase liquid nitrogen (lymphocytes). At a later date, single 0.5ml serum aliquot  
32 was removed for every CheckPoint participant and the combined aliquots were shipped in a  
33 single batch to Nightingale Health (Helsinki, Finland) on dry ice for NMR metabolomics.

34  
35

## 1 **Measures**

### 2 3 Metabolomic profiling

4 The Nightingale<sup>®</sup> NMR metabolomics platform (Helsinki, Finland) was used to obtain  
5 metabolomics for children and parents using the 2016-version quantification algorithm.  
6 Details of this platform and methodology have been extensively described elsewhere,<sup>6 19</sup> and  
7 epidemiological applications were recently reviewed.<sup>20</sup> Briefly, metabolites were measured  
8 from 0.35mL of serum using a single high-throughput experimental setup for the  
9 simultaneous quantification of routine lipids, lipoprotein subclass distributions, particle size  
10 and composition, fatty acids, and other low-molecular weight metabolites such as amino  
11 acids and glycolysis-related metabolites. This generated data on 228 serum metabolite  
12 measures in absolute concentration units (eg millimoles per liter) and ratios (summarised in  
13 Table 1). Whilst widely used for epidemiological research, the NMR-based quantification has  
14 not been certified for clinical diagnostics. Further analytical validation of the quantification  
15 protocols for the biomarker subset routinely used in clinical settings (eg established  
16 cholesterol measures and creatinine) is expected to lead to recalibration of certain metabolite  
17 concentrations to better match clinical gold standards.<sup>20</sup>

18



1 **Table 1. Summary of biomarkers and derived variables obtained via high-throughput NMR**

| Metabolic group                        | Species and derived measures                                                                                                                                                                                                                                                                                                                                                                                                             |
|----------------------------------------|------------------------------------------------------------------------------------------------------------------------------------------------------------------------------------------------------------------------------------------------------------------------------------------------------------------------------------------------------------------------------------------------------------------------------------------|
| <b>Amino acids</b>                     | Alanine, Glutamine, Glycine, Histidine                                                                                                                                                                                                                                                                                                                                                                                                   |
|                                        | Branched chain: Isoleucine, Leucine, Valine                                                                                                                                                                                                                                                                                                                                                                                              |
|                                        | Aromatic: Phenylalanine, Tyrosine                                                                                                                                                                                                                                                                                                                                                                                                        |
| <b>Cholesterol</b>                     | VLDL, LDL, HDL, HDL2, HDL3, Total, Free, Esterified, Remnant                                                                                                                                                                                                                                                                                                                                                                             |
| <b>Triglycerides and phospholipids</b> | Triglycerides (VLDL, LDL, HDL, total)                                                                                                                                                                                                                                                                                                                                                                                                    |
|                                        | Phosphoglycerides                                                                                                                                                                                                                                                                                                                                                                                                                        |
|                                        | Ratio of triglycerides to phosphoglycerides*                                                                                                                                                                                                                                                                                                                                                                                             |
|                                        | Phosphatidylcholine                                                                                                                                                                                                                                                                                                                                                                                                                      |
|                                        | Sphingomyelins                                                                                                                                                                                                                                                                                                                                                                                                                           |
| Total cholines                         |                                                                                                                                                                                                                                                                                                                                                                                                                                          |
| <b>Apolipoproteins</b>                 | Apolipoprotein A-1 (ApoA-1)                                                                                                                                                                                                                                                                                                                                                                                                              |
|                                        | Apolipoprotein B (Apo B)                                                                                                                                                                                                                                                                                                                                                                                                                 |
|                                        | Ratio of Apolipoprotein B to Apolipoprotein A-1 (ApoB/Apo A-1)*                                                                                                                                                                                                                                                                                                                                                                          |
| <b>Fatty acids (FA)</b>                | Total, Omega-3, Omega-6, Polyunsaturated (PUFA), Saturated (SFA)                                                                                                                                                                                                                                                                                                                                                                         |
|                                        | Monounsaturated (MUFA), Docosahexaenoic acid (DHA), Linoleic (LA)                                                                                                                                                                                                                                                                                                                                                                        |
|                                        | Estimated degree of unsaturation                                                                                                                                                                                                                                                                                                                                                                                                         |
| <b>Fatty acid ratios</b>               | Omega-3/total FA*, Omega-6/total FA*, PUFA/total FA* (all %)                                                                                                                                                                                                                                                                                                                                                                             |
|                                        | SFA/total FA*, MUFA/total FA*, DHA/total FA*, LA/total FA* (all %)                                                                                                                                                                                                                                                                                                                                                                       |
| <b>Lipoprotein subclasses*</b>         | 12 lipid measures in each of 14 subclasses<br>VLDL (XXL, XL, L, M, S, XS), IDL, LDL (L,M,S), HDL (XL, L, M,S):<br>Particle concentration, Total lipids, Esterified cholesterol, Total cholesterol, Phospholipids, Free cholesterol, Triglycerides and Esterified cholesterol/Total lipids (%), Free cholesterol/Total lipids (%), Total cholesterol/Total lipids (%), Triglycerides/Total lipids (%) and Phospholipids/Total lipids (%). |
| <b>Lipoprotein size*</b>               | Mean diameter of VLDL, LDL and HDL particles                                                                                                                                                                                                                                                                                                                                                                                             |
| <b>Ketone bodies</b>                   | Acetate, Acetoacetate, 3-hydroxybutyrate                                                                                                                                                                                                                                                                                                                                                                                                 |
| <b>Glycolysis related</b>              | Glucose, Lactate, Pyruvate, Citrate, Glycerol                                                                                                                                                                                                                                                                                                                                                                                            |
| <b>Fluid balance</b>                   | Creatinine, Albumin                                                                                                                                                                                                                                                                                                                                                                                                                      |
| <b>Inflammation</b>                    | Glycoprotein acetyls (GlycA)                                                                                                                                                                                                                                                                                                                                                                                                             |

2 Information obtained from <https://nightingalehealth.com/science/biomarkers>

3 \* ratio; ApoA-1: Apolipoprotein A-1; Apo B: Apolipoprotein B; DHA: Docosahexaenoic acid; GlycA: Glycoprotein acetyls;  
4 HDL: High-density lipoprotein; IDL: Intermediate density lipoprotein; L: Large; LDL: Low-density lipoprotein; LA:  
5 Linoleic acid; M: Medium; MUFA: Monounsaturated fatty acid; PUFA: Polyunsaturated fatty acid; S: Small; SFA:  
6 Saturated fatty acids; VLDL: Very low density lipoprotein; XL: Very large; XXL: Chylomicrons and extremely large; XS:  
7 Very small.

8  
9 Many of the 228 metabolomics measures correlate substantially both in adults  
10 (supplementary figure 1) and children (supplementary figure 2) and the pattern of correlations  
11 were similar for adults and children. For clarity, we therefore focused on a subset of 74  
12 metabolites in analyses. We eliminated the 5 ratio measures for each of the 14 lipoprotein  
13 subclass particles. In addition, the 7 other measures within each of the lipoproteins (esterified  
14 cholesterol, free cholesterol, total cholesterol, triglycerides, phospholipids, total lipids and  
15 particle concentration) are all highly correlated and therefore we only reported total lipids for  
16 each of the lipoprotein subclass particles.

## 1 Other measures and sample characteristics

2 *Age and sex:* For children, LSAC provided date of birth (DOB) and sex, which was originally  
3 exported from the Medicare Australia database. In parents, DOB and sex was self-reported in  
4 the CheckPoint questionnaire. Age in years was calculated as the difference between date of  
5 the CheckPoint assessment and DOB divided by 365.

6 *Disadvantage index:* LSAC provided contact details of families consenting to be contacted  
7 by CheckPoint. The family's residential postcode was confirmed during the CheckPoint  
8 recruitment phone call and updated, if required. The disadvantage index score of postcode  
9 was used to summarise neighbourhood socioeconomic position. Generated by the ABS  
10 from the 2011 national Census, the index numerically summarises the social and economic  
11 conditions of Australian neighbourhoods; national mean 1000, standard deviation 100;  
12 higher scores indicate less disadvantage.<sup>21</sup>

13  
14 *Time of blood collection, processing and fasting time:* Time of blood collection and start of  
15 laboratory processing were recorded. When missing, collection time was estimated using the  
16 midpoint between the time the CheckPoint visit began and time that processing of the sample  
17 commenced. Processing lag time was calculated as the minutes between blood collection and  
18 the processing commencement. Most samples were processed within two hours.

19 Fasting time was calculated as the hours between last eating/drinking to time of blood  
20 collection. The last time of eating/drinking was cross-checked against when the participant  
21 was taking part in other CheckPoint stations (and known not to be eating) as well as sleep and  
22 wake times from accelerometry data (to identify usual activity, and therefore likely eating  
23 patterns) when available. Further details of cleaning processes for the time of last eat/drink  
24 can be found elsewhere.<sup>22</sup>

## 25 **Statistical analysis**

### 26 Sample Characteristics

27  
28 Continuous descriptive variables and metabolite measures were summarised using means and  
29 standard deviations (SD) for children and adults separately, by sex and overall. For skewed  
30 metabolites, geometric means and relative SD were reported. To provide visual comparisons  
31 of distributions of metabolites by age and sex, density plots were used. Population summary  
32 statistics were estimated by applying survey weights and survey procedures that corrected for  
33 sampling, participation and non-response biases, and took into account clustering in the  
34 sampling frame. Standard errors were calculated taking into account the complex design and  
35 weights.<sup>23</sup> More detail on the calculation of weights is provided elsewhere.<sup>24</sup>

1 Differences in metabolite concentration by age (adults compared to children) and by sex  
2 (adults, children)

3 Skewed metabolites (skewness greater or equal to 2) were log-transformed. We used two-  
4 sided paired and unpaired t-tests (as appropriate) to assess differences in mean metabolite  
5 concentrations between adults and children in parent-child dyads, and between males and  
6 females for adults and children separately. P-values were adjusted using Benjamini-  
7 Hochberg (B-H) with a false discovery rate (FDR) of 10% to account for multiple  
8 comparisons.

9 Parent-Child concordance

10 Concordance between parents and children was assessed by 1) Pearson's correlation  
11 coefficients (CC) with 95% confidence intervals, and 2) partial correlation coefficients  
12 (PCC), adjusting for child and parent age, disadvantage index, fasting time, processing lag  
13 time (and for child and parent sex where appropriate). Scatterplots of parent versus child  
14 metabolites (log-transformed where needed as above) were examined to check for outliers  
15 and to ensure assumptions were met.

16 The analyses were repeated using weighted multi-level survey analyses and compared to  
17 unweighted analyses. As there appeared to be no major effect of response patterns on  
18 results we reported results from unweighted analyses. Analyses were undertaken using  
19 Stata version 14.2 (StataCorp, College Station, TX) and R version 3.3.2.<sup>25</sup>

20 **Patient and Public Involvement:** Because LSAC is a population-based longitudinal study,  
21 no patient groups were involved in its design or conduct. To our knowledge, the public was  
22 not involved in the study design, recruitment or conduct of LSAC study or its CheckPoint  
23 module. Parents received a summary health report for their child and themselves at or soon  
24 after the assessment visit. They consented to take part knowing that they would not otherwise  
25 receive individual results about themselves or their child.

## 1 RESULTS

### 3 Sample characteristics

5 The recruitment and retention of participants in the Child Health CheckPoint are described  
6 elsewhere.<sup>18</sup> Of the 1874 families who participated in CheckPoint assessment centres, blood  
7 serum samples of analysable quality from 1180 children and 1325 parents (figure 1) were  
8 sent for NMR quantification of metabolites. The majority of excluded families undertook  
9 home visits or attended a regional centre, where blood samples could not be collected (n=385,  
10 20.5%), while some participants declined a blood sample (children, n=150, 8.0%; adults,  
11 n=108, 5.8%). Few data were lost due to insufficient volume or poor quality samples at the  
12 assessment centre (figure 1). The sample characteristics of parents and children are outlined  
13 in table 2. Summary statistics for our main child and parent metabolite measures are  
14 presented in supplementary table 1. Supplementary figures 3-7 show density plots comparing  
15 the distributions of metabolites for boys, girls and adults.

**Table 2: Sample characteristics; values are weighted mean (standard deviation)**

| Characteristic                 | All         | Male        | Female      |
|--------------------------------|-------------|-------------|-------------|
| <b>Child</b>                   |             |             |             |
| n                              | 1152-1180   | 558-575     | 594-605     |
| Age, years                     | 12.0 (0.4)  | 12.0 (0.4)  | 12.0 (0.4)  |
| Disadvantage Index             | 1012 (63)   | 1011 (65)   | 1014 (61)   |
| Fasting time (hours)           | 4.2 (1.2)   | 4.3 (1.3)   | 4.2 (1.1)   |
| Time of day - blood collection | 14.16 (2.0) | 14.12 (2.0) | 14.20 (2.1) |
| Processing lag time (hours)    | 1.16 (0.5)  | 1.18 (0.5)  | 1.14 (0.5)  |
| <b>Parent</b>                  |             |             |             |
| n                              | 1272-1325   | 174-177     | 1098-1148   |
| Age, years                     | 43.9 (5.6)  | 46.9 (6.9)  | 43.4 (5.2)  |
| Fasting time (hours)           | 3.3 (1.6)   | 3.6 (2.0)   | 3.2 (1.5)   |
| Time of day - blood collection | 13.10 (2.0) | 13.18 (2.1) | 13.09 (2.0) |
| Processing lag time (hours)    | 1.26 (0.5)  | 1.31 (0.5)  | 1.26 (0.5)  |

Disadvantage Index: Index of Relative Socioeconomic Disadvantage; n: number of participants in cohort with this measure.

#### **Differences in metabolite levels by age (adults compared to children)**

Figure 2 shows mean differences in metabolite levels for adults relative to children in standard deviation (SD) units. Most concentrations were higher in adults than children. Values that were similar in adults and children included total lipids in very large HDL lipoprotein subclass particles, acetoacetate, tyrosine and glucose. Levels in children were higher than those of adults for the majority of glycolysis related measures (lactate, pyruvate, citrate and glycerol), the ketone body 3-hydroxybutrate, the amino acid glutamine, many fatty acid ratios and all lipoprotein particle sizes. Supplementary table 2 lists the corresponding estimates in absolute concentration units.

#### **Sex-specific differences in metabolite levels in children and adults**

Figure 3 shows differences in mean metabolite levels by sex for children and adults separately in SD units, with estimates in absolute concentration units listed in supplementary table 3 and 4.

In general, sex differences were more pronounced in adulthood, resulting in distinct overall patterns for children and adults. Children generally showed smaller differences by sex than

1 adults. Of note, sex differences for apolipoproteins and fatty acid measures showed different  
2 patterns in children compared to adults.

3 Girls had lower levels of apolipoprotein-A-1 (ApoA-1) and higher ApoB than boys. In adults,  
4 the opposite pattern was observed with females having higher ApoA-1 and lower ApoB than  
5 males. In children, some fatty acid concentrations were higher in girls than boys. In contrast,  
6 many adult fatty acid measures were higher in males. There was no evidence of a difference  
7 in the level of inflammation (GlycA) by sex in children, while in adults, GlycA levels tended  
8 to be higher in males than females.

9 For some metabolites, sex differences in children mirrored (but were smaller in magnitude  
10 than) those of adults, particularly for the ketone body acetate and some key amino acids. At  
11 both ages, the amino acid glycine was higher in females but the branched-chain amino acids  
12 leucine and valine tended to be higher in males.

### 13 **Parent-child concordance**

14 Figure 4 shows the correlations between metabolite measures for all children with all parents,  
15 and for boys and girls with mothers (but not with the 177 fathers, given the small numbers).  
16 The corresponding correlation coefficients and partial correlation coefficients are listed in  
17 supplementary tables 5 and 6.

18 Correlations for all parents and all children showed similar patterns to that observed for  
19 mother and child by sex. While there was little suggestion of substantial correlation within  
20 parent-child dyads for some metabolites (eg glucose, acetate) a positive correlation was found  
21 for many metabolite measures irrespective of child sex. For example, positive correlations  
22 were observed for isoleucine (CC 0.33, 95% CI 0.27 to 0.38), total serum cholesterol (CC  
23 0.30, 95% CI 0.24 to 0.35) and omega 6 fatty acids (CC 0.28, 95% CI 0.23 to 0.34) in parent-  
24 child comparisons. Additional adjustment for factors that potentially influence metabolite  
25 levels (age, socioeconomic status, fasting time and processing lag time) had little effect on  
26 the degree of correlation in any comparison (supplementary tables 5 and 6).

27



## 1 DISCUSSION

### 2 Principal findings

3 Here we present age and sex differences, describing the distribution of detailed/NMR-based  
4 metabolite measures in Australian 11-12 year old children and their parents, and demonstrate  
5 that many metabolite measures have high parent-child concordance. In accord with previous  
6 studies, we observed major differences in metabolite levels between childhood and adulthood  
7 and also differences by sex in both childhood and adulthood. We also observed variability in  
8 the magnitude of differences by sex for several metabolites in childhood compared to  
9 adulthood and identified a complex interplay of correlations of specific metabolites between  
10 parents and their children according to parent-child sex relationships.

### 11 Strengths and weaknesses

12 This is the first major cohort study to report both sex- and cross-generational differences in  
13 metabolomic concentrations in mid-childhood to adulthood utilising the NMR platform.  
14 Further strengths include the large number of parent-child dyads representing a wide range of  
15 parent ages, the national population-based sample and the state-of-the-art measurements.  
16 Replication studies exploring sex differences at earlier and later stages of childhood and  
17 adolescence would strengthen findings.

18 An important limitation is that paternal factors were not fully represented, as most parental  
19 samples were from mothers (a well-documented problem in longitudinal cohort studies). This  
20 also limited sex-specific parental contribution analysis; further studies including more fathers  
21 are warranted. Additional limitations are that, without samples from both parents for each  
22 child, we could not estimate heritability, and our results might not apply to mid-life adults  
23 who are not parents (although we see no good reason why these would differ greatly). The  
24 original uptake of just over 50% and subsequent attrition within LSAC and then the  
25 CheckPoint has led to a relatively advantaged sample, but nonetheless participants varied  
26 widely on key potential confounders (eg disadvantage, age) and this was at least partly offset  
27 by application or consideration of survey weights. Given the large number of metabolites and  
28 modest sample size, considerable uncertainty remains in any ranking of the various effects  
29 across metabolites.

### 30 Meaning and implications for clinicians and policymakers

31 Overall, we found a clear difference in metabolite profile between children and their parents.  
32 This was apparent for specific metabolite measures (such as some amino acids) as well as the

1 distribution of metabolites (such as lipid composition of lipoproteins of different density).  
2 Some measures were higher in adults, some similar, while a minority were lower. Previous  
3 studies, largely in adults, have identified a range of specific metabolite changes with age,  
4 particularly from mid to late adulthood.<sup>26</sup> This includes a general decrease in several amino  
5 acid species, which contrasts with our findings from childhood to mid adulthood.<sup>8</sup> Only the  
6 amino acid glutamine showed this pattern in our dataset.

7 Sex-specific differences in children ( $\pm 0.2$  SD) were generally much smaller than in adults  
8 ( $\pm 0.8$  SD). Large metabolomic studies using alternative platforms have previously reported  
9 reproducible, sex-specific signatures in circulating metabolite profile in adults.<sup>27-28</sup> This  
10 includes differences in amino acid and lipid serum concentrations, potentially influenced by  
11 sex-specific effects of genetic polymorphisms on metabolite levels.<sup>28-29</sup> As in our study, most  
12 amino acids have usually been reported to be higher in men than women.<sup>28-30</sup> For example, in a  
13 recent study of 507 metabolic markers in 1756 individuals (903 female and 853 male aged  
14 ~60 years), one third of metabolites showed significant sexual dimorphism. These were  
15 predominantly related to pathways of steroid metabolism, fatty acids, other lipids, and a large  
16 proportion of amino acids.<sup>30</sup> Of particular note, branched chain amino acids (BCAAs) and  
17 their related metabolic products were amongst the most differentially represented, with much  
18 higher isoleucine, leucine and valine in males. A similar finding of higher leucine and valine  
19 was also noted in the Cooperative Health Research in the Region of Augsburg (KORA)  
20 follow-ups 3 (F3) and 4 (F4) analysis of >3000 adults,<sup>28</sup> consistent with our observations in  
21 adulthood.

22 In children, we found sex-specific differences for leucine and valine were smaller but in the  
23 same direction as adults. Several lines of evidence implicate BCAA metabolism with  
24 metabolic risk in humans. For example, three candidate genes for obesity and/or type 2  
25 diabetes mellitus (T2DM) are involved in the BCAA metabolic pathway.<sup>31</sup> In a recent large  
26 meta-analysis of metabolomics in diabetes, a >30% higher risk of type 2 diabetes was found  
27 per SD increase in isoleucine, leucine, valine or tyrosine, whereas glycine and glutamine  
28 were inversely associated with risk.<sup>31</sup> Several clinical studies have also reported that BCAAs  
29 positively correlate with insulin resistance, homeostatic model assessment (HOMA) index  
30 and levels of haemoglobin A1c (HbA1c), while longitudinal studies have reported that  
31 increased blood BCAAs are predictive of future insulin resistance and type 2 diabetes  
32 (T2D).<sup>32</sup> It is intriguing to speculate that the higher BCAA in males from early life could  
33 contribute to the well-described increasing prevalence of T2D in men. Levels of BCAA are

1 elevated in females with Polycystic Ovary Syndrome (PCOS), potentially contributing to the  
2 associated insulin resistance.<sup>33</sup> However, it remains unclear whether BCAA are on the causal  
3 pathway to T2D or result from adverse metabolic health. Our demonstration that the sex-  
4 specific differences in BCAA arise early in life offers potential to track their association with  
5 sex-specific measures of metabolic health from an early age to help clarify where they lie on  
6 the causal pathway.

7 In accord with previous adult studies<sup>28</sup>, we found higher levels of glycine in mothers than  
8 fathers, and (less markedly) in girls than boys. Interestingly, recent metabolomics and genetic  
9 analyses of ~10,000 adults with cardiovascular disease (CVD), with replication in >53,000  
10 subjects, identified a genetic variant in carbamoyl-phosphate synthase 1 (*CPS1*) (linked to  
11 plasma glycine levels) to be strongly associated with a reduced risk of CVD in women  
12 ( $p=6.3 \times 10^{-5}$ ) but not men ( $p=0.95$ ), suggesting a direct link between glycine levels and CVD  
13 risk, although whether this is a causal association remains unclear.<sup>34</sup> It will be interesting in  
14 the future to explore the link between variants in *CPS1* and circulating glycine levels from  
15 early life to adulthood in relation to markers of cardiovascular health in females.

16 The small sex-differences of HDL cholesterol and ApoA-1 in children compared to adults is  
17 consistent with modest differences in children, whereas substantial differences in adulthood  
18 have previously been reported.<sup>35</sup> ApoA-1 was more abundant in boys, while ApoB was  
19 higher in girls, leading to a higher ApoB/ApoA-1 ratio in girls. The opposite pattern was  
20 found in our limited sample of fathers relative to mothers. These data are surprising and  
21 differ from a similarly sized study of slightly older European adolescent children (mean age  
22 15 years) that found higher ApoA-1 and ApoB in girls relative to boys.<sup>36</sup> Interestingly, a  
23 higher ApoB/ApoA-1 ratio has been strongly linked to increased coronary risk in adults,<sup>37-39</sup>  
24 suggesting that the sex-specific differences may alter with increasing age, in keeping with the  
25 increased CVD risk in adult males. ApoA-1 is the main protein component of HDL  
26 cholesterol<sup>40</sup> thus the differences in trajectories in lipids and HDL cholesterol for boys and  
27 girls across childhood that have been reported<sup>41 42</sup> could partially explain this observation.

28 These are the first data on the mother-child or parent-child correlations of NMR metabolites.  
29 Smaller studies have reported positive correlations between parents and children for a limited  
30 range of cardiometabolic risk factors including total cholesterol, LDL cholesterol, HDL  
31 cholesterol and triglycerides measured using conventional methods. We found positive  
32 correlations between parents and children for the same lipid measures (although measured  
33 using NMR) consistent with previously reported findings. One study reported a positive

1 association between the serum lipid levels of 4 year old children (n=127) and their parents  
2 (122 mothers and 118 fathers)<sup>43</sup> while another study of children aged 6-18 (n=255) and their  
3 parents (n=179) found that the age of the child influenced the degree of correlation of several  
4 lipid measures, with older (10-18 years) children more similar to their parents in terms of  
5 triglyceride levels than younger individuals (6-9 years).<sup>12</sup>

## 6 **Unanswered questions and future research**

7 The temporal and sex specific dynamism of the metabolomics data we describe here offer  
8 considerable opportunities for identification of biomarkers of risk for a range of non-  
9 communicable diseases early in life, to inform targeted interventions and monitor their  
10 efficacy. Combining metabolomics with other 'omics data (such as genetics), as is  
11 increasingly reported from large adult studies, offers considerable promise in understanding  
12 the causal pathways that link early life exposures, genetics and intermediate phenotypes with  
13 later onset chronic disease, and in identifying clinically relevant biomarkers.

14 In conclusion, we describe the metabolite profile from mid-childhood and adulthood in a  
15 population-based sample, together with parent-child concordance and sex-specific differences  
16 in children and adults. In this descriptive paper, distinct age- and sex-specific profiles were  
17 observed, as well as considerable evidence of correlation between parent and child measures.  
18 These data will be informative for investigation of the childhood origins of adult non-  
19 communicable diseases and for comparative studies across populations.

## 1 ACKNOWLEDGEMENTS

2 This paper uses unit record data from *Growing Up in Australia*, the Longitudinal Study of  
3 Australian Children. The study is conducted in partnership between the Department of Social  
4 Services (DSS), the Australian Institute of Family Studies (AIFS) and the Australian Bureau  
5 of Statistics (ABS). The findings and views reported in this paper are those of the author and  
6 should not be attributed to DSS, AIFS or the ABS.

7  
8 REDCap (Research Electronic Data Capture) tools [ENREF 43](#)<sup>44</sup> were used in this study. More  
9 information about this software can be found at: [www.project-redcap.org](http://www.project-redcap.org).

10 We thank the LSAC and CheckPoint study participants, staff and students for their  
11 contributions.

## 12 COMPETING INTERESTS

13  
14 All authors have completed the ICMJE uniform disclosure form at  
15 [www.icmje.org/coi\\_disclosure.pdf](http://www.icmje.org/coi_disclosure.pdf) and declare financial support as described in the funding  
16 section. MW received support from Sandoz to present at a symposium outside the submitted  
17 work. PW is employee and shareholder of Nightingale Health Ltd, a company offering  
18 NMR-based metabolic profiling.

## 19 FUNDING

20  
21 This work was supported by the National Health and Medical Research Council (NHMRC)  
22 of Australia (Project Grants 1041352, 1109355), The Royal Children's Hospital Foundation  
23 (2014-241), the Murdoch Children's Research Institute, The University of Melbourne, the  
24 National Heart Foundation of Australia (100660) and the Financial Markets Foundation for  
25 Children (2014-055, 2016-310). NHMRC Senior Research Fellowships supported MW  
26 (1046518), DB (1064629) and RS (1045161). MW was supported by Cure Kids New Zealand  
27 and DB holds an Honorary Future Leader Fellowship of the National Heart Foundation of  
28 Australia (100369). PW is supported by Academy of Finland (grant numbers 312476 and  
29 312477). The MCRI administered the research grants for the study and provided  
30 infrastructural support (IT and biospecimen management) to its staff and the study, but  
31 played no role in the conduct or analysis of the trial. DSS played a role in study design;  
32 however, no other funding bodies had a role in the study design and conduct; data collection,  
33 management, analysis, and interpretation; preparation, review, or approval of the manuscript;

1  
2  
3  
4  
5  
6  
7  
8  
9  
10  
11  
12  
13  
14  
15  
16  
17  
18  
19  
20  
21  
22  
23  
24  
25  
26  
27  
28  
29  
30  
31  
32  
33  
34  
35  
36  
37  
38  
39  
40  
41  
42  
43  
44  
45  
46  
47  
48  
49  
50  
51  
52  
53  
54  
55  
56  
57  
58  
59  
60

1 and decision to submit the manuscript for publication. Research at the MCRI is supported by  
2 the Victorian Government's Operational Infrastructure Support Program.

3

#### 4 **CONTRIBUTIONS**

5  
6 DB, RS and JC conceptualised and developed the Metabolomics Checkpoint study. SE and  
7 JC undertook all aspects of data analysis. SAC coordinated the acquisition of metabolomics  
8 data and provided critical review of this manuscript. MW, the Principal Investigator of the  
9 Child Health CheckPoint, planned the analyses and provided critical review of this  
10 manuscript. SE and RS drafted the manuscript. PW, MJ, TD, KL, JC, DB provided critical  
11 expert advice and critical review of this manuscript.

#### 12 **DATA SHARING STATEMENT**

13  
14 Dataset and technical documents available from *Growing Up in Australia: The Longitudinal*  
15 *Study of Australian Children* via low-cost license for bone fide researchers. More information  
16 is available at [www.growingupinaustralia.gov.au](http://www.growingupinaustralia.gov.au)

17  
18



## 1 **FIGURE CAPTIONS AND FOOTNOTES**

### 2 **Figure 1: Participant flow chart.**

3 n=number of families, c=number of children, p=number of attending adults,

4 MAC=Main assessment centre, mAC=Mini assessment centre, HV=Home visit assessment,

5 LSAC=Longitudinal Study of Australian Children

6 \*Unable to analyse due to insufficient volume or poor quality sample

7 ^Data from 6 non-biological child-parent pairs excluded from concordance analyses

### 8 **Figure 2: Differences in metabolite levels between children and adults.**

9 Association measures are SD difference in metabolite concentration for adults compared to  
10 children. Error bars represent 95% confidence intervals. Significant associations after p-  
11 values adjusted for multiple testing using Benjamini-Hochberg procedure are shown in bold  
12 (FDR=0.10). Association measures in absolute concentration units, 95% confidence intervals  
13 and associated p-values are listed in supplementary table 2. HDL: High-density lipoprotein;  
14 IDL: Intermediate density lipoprotein; LDL: Low-density lipoprotein; VLDL: Very low  
15 density lipoprotein.

### 16 **Figure 3: Sex-specific differences in metabolite levels in childhood and adulthood.**

17 Association measures are SD difference in metabolite concentration for females compared to  
18 males in children (A) and adults (B). Error bars represent 95% confidence intervals.  
19 Significant associations after p-values adjusted for multiple testing using Benjamini-  
20 Hochberg procedure are shown in bold (FDR=0.10). Association measures in absolute  
21 concentration units, 95% confidence intervals and associated p-values are listed in  
22 supplementary table 3 and 4. HDL: High-density lipoprotein; IDL: Intermediate density  
23 lipoprotein; LDL: Low-density lipoprotein; VLDL: Very low density lipoprotein.

### 24 **Figure 4: Parent:child correlation for metabolite measures.**

25 Pearson's correlation coefficients for all children with all parents (A); and for boys (blue)  
26 with mothers and for girls (red) with mothers (B). Error bars represent 95% confidence  
27 intervals. Correlation coefficients with associated 95% confidence intervals are listed in

1  
2  
3  
4  
5  
6  
7  
8  
9  
10  
11  
12  
13  
14  
15  
16  
17  
18  
19  
20  
21  
22  
23  
24  
25  
26  
27  
28  
29  
30  
31  
32  
33  
34  
35  
36  
37  
38  
39  
40  
41  
42  
43  
44  
45  
46  
47  
48  
49  
50  
51  
52  
53  
54  
55  
56  
57  
58  
59  
60

1 supplementary table 5 and 6. HDL: High-density lipoprotein; IDL: Intermediate density  
2 lipoprotein; LDL: Low-density lipoprotein; VLDL: Very low density lipoprotein.  
3

For peer review only

## **SUPPLEMENTARY DOCUMENTS**

### **Supplementary figure 1: Correlation of NMR measures in children.**

Heatmap showing the correlation between metabolite measures in children. The correlations shown are Spearman's correlation coefficients with blue cells representing negative correlations and red cells representing positive correlations.

### **Supplementary figure 2: Correlation of NMR metabolite measures in parents.**

Heatmap showing the correlation between metabolite measures in parents. The correlations shown are Spearman's correlation coefficients with blue cells representing negative correlations and red cells representing positive correlations.

### **Supplementary figure 3: Density plots for cholesterol and apolipoprotein measures.**

Boys (blue), girls (red), and all parents (thin dotted black line) plotted on the same graph for each cholesterol and apolipoprotein measure.

### **Supplementary figure 4: Density plots for fatty acid and fatty acid ratio measures.**

Boys (blue), girls (red), and all parents (thin dotted black line) plotted on the same graph for each fatty acid and fatty acid ratio measure.

### **Supplementary figure 5: Density plots for total lipids in the 14 lipoprotein subclass particles.**

Boys (blue), girls (red), and all parents (thin dotted black line) plotted on the same graph for total lipids within each of the 14 lipoprotein subclass particles.

### **Supplementary figure 6: Density plots for lipoprotein particle size and triglyceride measures.**

Boys (blue), girls (red), and all parents (thin dotted black line) plotted on the same graph for lipoprotein particle sizes and triglyceride measures.

### **Supplementary figure 7: Density plots for glycolysis related, amino acid, ketone body, fluid balance and inflammation measures.**

Boys (blue), girls (red), and all parents (thin dotted black line) plotted on the same graph for glycolysis related, amino acid, ketone body, fluid balance and inflammation measures.

### **Supplementary table 1: Weighted mean (SD) of metabolite measures in children and parents.**

### **Supplementary table 2: Mean difference in metabolite levels in adults compared to children in absolute concentration units.**

1  
2  
3  
4  
5  
6  
7  
8  
9  
10  
11  
12  
13  
14  
15  
16  
17  
18  
19  
20  
21  
22  
23  
24  
25  
26  
27  
28  
29  
30  
31  
32  
33  
34  
35  
36  
37  
38  
39  
40  
41  
42  
43  
44  
45  
46  
47  
48  
49  
50  
51  
52  
53  
54  
55  
56  
57  
58  
59  
60

1 **Supplementary table 3: Differences in mean metabolite levels in girls compared to boys**  
2 **in absolute concentration units.**

3  
4 **Supplementary table 4: Differences in mean metabolite levels in female compared to**  
5 **male adults in absolute concentration units.**

6  
7  
8 **Supplementary table 5: Mother-child concordance; correlations and partial correlations**  
9 **between mothers and their sons, daughters and all children.**

10 **Supplementary table 6: Parent-child concordance; correlation and partial correlations**  
11 **between all parents and their sons, daughters and all children.**  
12

For peer review only

## 1 REFERENCES

1. Nicholson JK, Lindon JC, Holmes E. 'Metabonomics': understanding the metabolic responses of living systems to pathophysiological stimuli via multivariate statistical analysis of biological NMR spectroscopic data. *Xenobiotica* 1999;29(11):1181-9. doi: 10.1080/004982599238047
2. Nath AP, Ritchie SC, Byars SG, et al. An interaction map of circulating metabolites, immune gene networks, and their genetic regulation. *Genome biology* 2017;18(1):146. doi: 10.1186/s13059-017-1279-y
3. Shah SH, Newgard CB. Integrated metabolomics and genomics: systems approaches to biomarkers and mechanisms of cardiovascular disease. *Circ Cardiovasc Genet* 2015;8(2):410-9. doi: 10.1161/CIRCGENETICS.114.000223
4. Kaikkonen JE, Wurtz P, Suomela E, et al. Metabolic profiling of fatty liver in young and middle-aged adults: Cross-sectional and prospective analyses of the Young Finns Study. *Hepatology* 2017;65(2):491-500. doi: 10.1002/hep.28899
5. Johnson CH, Ivanisevic J, Siuzdak G. Metabolomics: beyond biomarkers and towards mechanisms. *Nat Rev Mol Cell Biol* 2016;17(7):451-9. doi: 10.1038/nrm.2016.25
6. Kettunen J, Tukiainen T, Sarin AP, et al. Genome-wide association study identifies multiple loci influencing human serum metabolite levels. *Nat Genet* 2012;44(3):269-76. doi: 10.1038/ng.1073
7. Suhre K, Gieger C. Genetic variation in metabolic phenotypes: study designs and applications. *Nat Rev Genet* 2012;13(11):759-69. doi: 10.1038/nrg3314
8. Yu Z, Zhai G, Singmann P, et al. Human serum metabolic profiles are age dependent. *Aging Cell* 2012;11(6):960-7. doi: 10.1111/j.1474-9726.2012.00865.x
9. Auro K, Joensuu A, Fischer K, et al. A metabolic view on menopause and ageing. *Nat Commun* 2014;5:4708. doi: 10.1038/ncomms5708
10. Saito K, Maekawa K, Kinchen JM, et al. Gender- and Age-Associated Differences in Serum Metabolite Profiles among Japanese Populations. *Biol Pharm Bull* 2016;39(7):1179-86. doi: 10.1248/bpb.b16-00226
11. Wang Q, Wurtz P, Auro K, et al. Metabolic profiling of pregnancy: cross-sectional and longitudinal evidence. *BMC Med* 2016;14(1):205. doi: 10.1186/s12916-016-0733-0
12. Halvorsen T, Moran A, Jacobs DR, Jr., et al. Relation of Cardiometabolic Risk Factors between Parents and Children. *J Pediatr* 2015;167(5):1049-56 e2. doi: 10.1016/j.jpeds.2015.07.053
13. Rueedi R, Ledda M, Nicholls AW, et al. Genome-Wide Association Study of Metabolic Traits Reveals Novel Gene-Metabolite-Disease Links. *PLOS Genetics* 2014;10(2):e1004132. doi: 10.1371/journal.pgen.1004132
14. Kettunen J, Demirkan A, Würtz P, et al. Genome-wide study for circulating metabolites identifies 62 loci and reveals novel systemic effects of LPA. *Nature Communications* 2016;7:11122. doi: 10.1038/ncomms11122  
<https://www.nature.com/articles/ncomms11122#supplementary-information>
15. Edwards B. Growing Up in Australia: The Longitudinal Study of Australian Children: Entering adolescence and becoming a young adult. *Family Matters* 2014(95):5-14.
16. Sanson A, Johnstone R. The LSAC Research Consortium & FaCS LSAC Project Team. Growing Up in Australia takes its first steps. *Family Matters* 2004;67:46-53.

17. Wake M, Clifford SA, York E, et al. Introducing Growing Up in Australia's Child Health CheckPoint. *Family Matters* 2014;94:15-23.
18. Clifford SA, Davies S, Wake M. Child Health CheckPoint: Cohort summary and methodology of a physical health and biospecimen module for the Longitudinal Study of Australian Children. Submitted to BMJ Open October 2017.
19. Soininen P, Kangas AJ, Wurtz P, et al. High-throughput serum NMR metabolomics for cost-effective holistic studies on systemic metabolism. *Analyst* 2009;134(9):1781-5. doi: 10.1039/b910205a
20. Wurtz P, Kangas AJ, Soininen P, et al. Quantitative Serum NMR Metabolomics in Large-Scale Epidemiology: A Primer on -Omic Technology. *Am J Epidemiol* 2017 [published Online First: 10 May 2017]
21. Australian Bureau of S. Census of population and housing: Socio-Economic Indexes for Areas (SEIFA) 2011. Cat. no. 2033.0.55.001, 2011.
22. Davies S, Clifford S, Gillespie A, et al. LSAC's Child Health CheckPoint Data Issues Paper 2018. *Melbourne: Murdoch Children's Research Institute* 2018 doi: 10.25374/MCRI.5821230.
23. Heeringa SG, West BT, Berglund PA. Applied survey data analysis. Boca Raton.: CRC press 2010.
24. Ellul S, Hiscock R, Mensah FK, et al. Longitudinal Study of Australian Children's Child Health CheckPoint Technical Paper 1: Weighting and Non-Response. *Melbourne: Murdoch Children's Research Institute* 2018 doi: <https://doi.org/10.25374/MCRI.5687593>
25. R: A language and environment for statistical computing [program]. Vienna, Austria: R Foundation for Statistical Computing, 2018.
26. Menni C, Kastenmüller G, Petersen AK, et al. Metabolomic markers reveal novel pathways of ageing and early development in human populations. *International Journal of Epidemiology* 2013;42(4):1111-19. doi: 10.1093/ije/dyt094
27. Dunn WB, Lin W, Broadhurst D, et al. Molecular phenotyping of a UK population: defining the human serum metabolome. *Metabolomics* 2015;11:9-26. doi: 10.1007/s11306-014-0707-1
28. Mittelstrass K, Ried JS, Yu Z, et al. Discovery of sexual dimorphisms in metabolic and genetic biomarkers. *PLoS Genet* 2011;7(8):e1002215. doi: 10.1371/journal.pgen.1002215
29. Kolz M, Johnson T, Sanna S, et al. Meta-analysis of 28,141 individuals identifies common variants within five new loci that influence uric acid concentrations. *PLoS Genet* 2009;5(6):e1000504. doi: 10.1371/journal.pgen.1000504
30. Krumsiek J, Mittelstrass K, Do KT, et al. Gender-specific pathway differences in the human serum metabolome. *Metabolomics* 2015;11(6):1815-33. doi: 10.1007/s11306-015-0829-0
31. Guasch-Ferré M, Hruby A, Toledo E, et al. Metabolomics in Prediabetes and Diabetes: A Systematic Review and Meta-analysis. *Diabetes Care* 2016;39(5):833-46. doi: 10.2337/dc15-2251
32. Lynch CJ, Adams SH. Branched-chain amino acids in metabolic signalling and insulin resistance. *Nature reviews Endocrinology* 2014;10(12):723-36. doi: 10.1038/nrendo.2014.171
33. Chang AY, Lalia AZ, Jenkins GD, et al. Combining a nontargeted and targeted metabolomics approach to identify metabolic pathways significantly altered in



- 1 polycystic ovary syndrome. *Metabolism* 2017;71(Supplement C):52-63. doi:  
2 <https://doi.org/10.1016/j.metabol.2017.03.002>
- 3 34. Hartiala JA, Wilson Tang WH, Wang Z, et al. Genome-wide association study and  
4 targeted metabolomics identifies sex-specific association of CPS1 with coronary  
5 artery disease. *Nature Communications* 2016;7:10558. doi: 10.1038/ncomms10558
- 6 35. Davis CE, Williams DH, Oganov RG, et al. Sex Difference in High Density Lipoprotein  
7 Cholesterol in Six Countries. *American Journal of Epidemiology* 1996;143(11):1100-  
8 06. doi: 10.1093/oxfordjournals.aje.a008686
- 9 36. Spinneker A, Egert S, Gonzalez-Gross M, et al. Lipid, lipoprotein and apolipoprotein  
10 profiles in European adolescents and its associations with gender, biological maturity  
11 and body fat--the HELENA Study. *Eur J Clin Nutr* 2012;66(6):727-35. doi:  
12 10.1038/ejcn.2011.222
- 13 37. Walldius G, Jungner I, Aastveit AH, et al. The apoB/apoA-I ratio is better than the  
14 cholesterol ratios to estimate the balance between plasma proatherogenic and  
15 antiatherogenic lipoproteins and to predict coronary risk. *Clin Chem Lab Med*  
16 2004;42(12):1355-63. doi: 10.1515/CCLM.2004.254
- 17 38. Walldius G, Jungner I. The apoB/apoA-I ratio: a strong, new risk factor for cardiovascular  
18 disease and a target for lipid-lowering therapy--a review of the evidence. *J Intern*  
19 *Med* 2006;259(5):493-519. doi: 10.1111/j.1365-2796.2006.01643.x
- 20 39. Mozaffarian D, Benjamin EJ, Go AS, et al. Heart disease and stroke statistics--2015  
21 update: a report from the American Heart Association. *Circulation* 2015;131(4):e29-  
22 322. doi: 10.1161/CIR.0000000000000152
- 23 40. Upadhyay RK. Emerging Risk Biomarkers in Cardiovascular Diseases and Disorders.  
24 *Journal of Lipids* 2015;2015:971453. doi: 10.1155/2015/971453
- 25 41. Hardy R, Lawlor DA, Kuh D. A life course approach to cardiovascular aging. *Future*  
26 *cardiology* 2015;11(1):101-13. doi: 10.2217/fca.14.67
- 27 42. Jolliffe CJ, Janssen I. Distribution of Lipoproteins by Age and Gender in Adolescents.  
28 *Circulation* 2006;114(10):1056.
- 29 43. Ohlund I, Hernell O, Hornell A, et al. Serum lipid and apolipoprotein levels in 4-year-old  
30 children are associated with parental levels and track over time. *Eur J Clin Nutr*  
31 2011;65(4):463-69.
- 32 44. Harris PA, Taylor R, Thielke R, et al. Research electronic data capture (REDCap)—A  
33 metadata-driven methodology and workflow process for providing translational  
34 research informatics support. *Journal of Biomedical Informatics* 2009;42(2):377-81.  
35 doi: <https://doi.org/10.1016/j.jbi.2008.08.010>
- 36

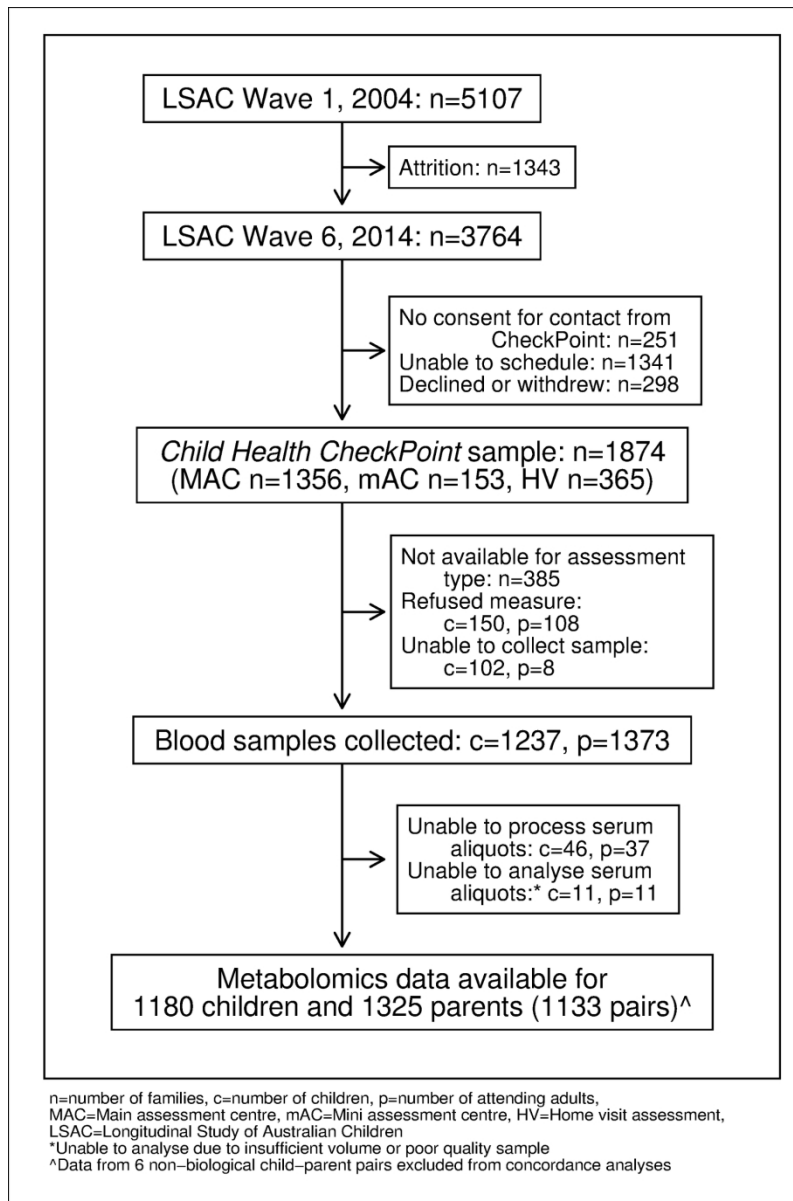

Figure 1: Participant flow chart.

n=number of families, c=number of children, p=number of attending adults,  
MAC=Main assessment centre, mAC=Mini assessment centre, HV=Home visit assessment,  
LSAC=Longitudinal Study of Australian Children

\*Unable to analyse due to insufficient volume or poor quality sample

^Data from 6 non-biological child-parent pairs excluded from concordance analyses

76x114mm (600 x 600 DPI)

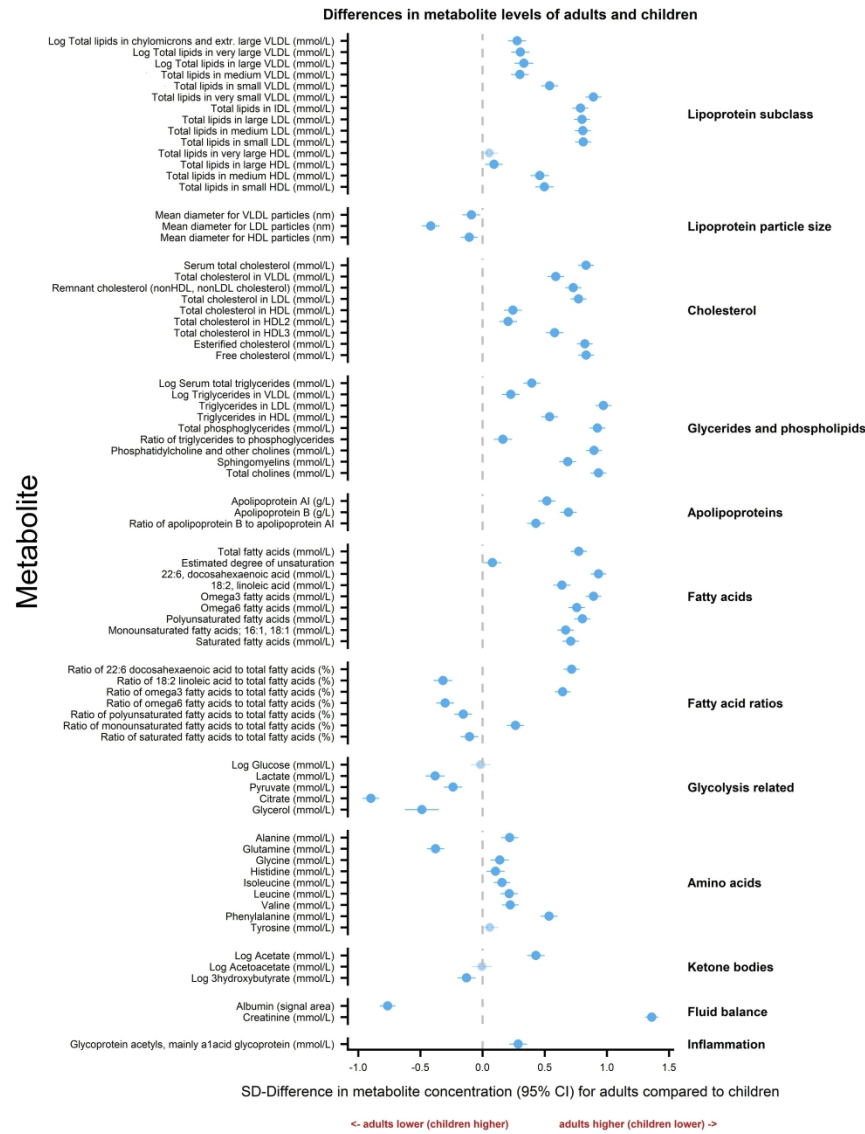

Figure 2: Differences in metabolite levels between children and adults.

Association measures are SD difference in metabolite concentration for adults compared to children. Error bars represent 95% confidence intervals. Significant associations after p-values adjusted for multiple testing using Benjamini-Hochberg procedure are shown in bold (FDR=0.10). Association measures in absolute concentration units, 95% confidence intervals and associated p-values are listed in supplementary table 2. HDL: High-density lipoprotein; IDL: Intermediate density lipoprotein; LDL: Low-density lipoprotein; VLDL: Very low density lipoprotein.

254x338mm (300 x 300 DPI)

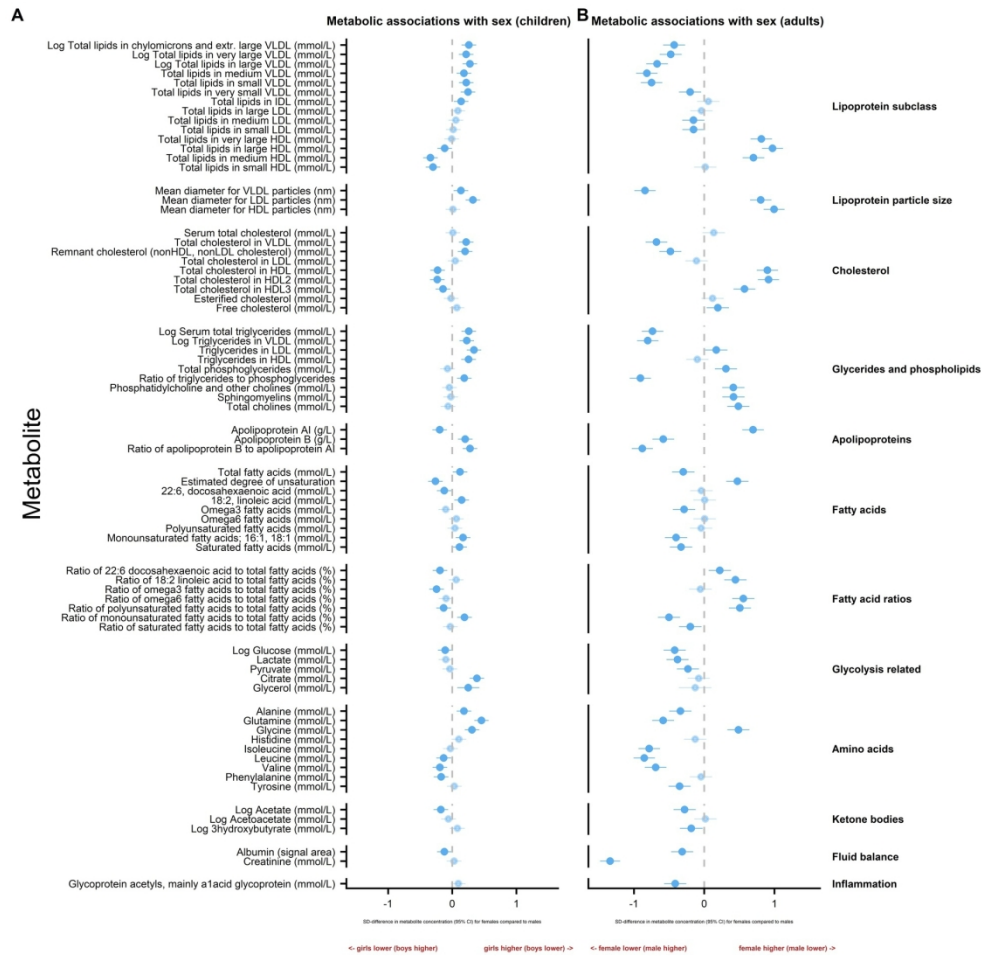

Figure 3: Sex-specific differences in metabolite levels in childhood and adulthood.

Association measures are SD difference in metabolite concentration for females compared to males in children (A) and adults (B). Error bars represent 95% confidence intervals. Significant associations after p-values adjusted for multiple testing using Benjamini-Hochberg procedure are shown in bold (FDR=0.10). Association measures in absolute concentration units, 95% confidence intervals and associated p-values are listed in supplementary table 3 and 4. HDL: High-density lipoprotein; IDL: Intermediate density lipoprotein; LDL: Low-density lipoprotein; VLDL: Very low density lipoprotein.

169x169mm (300 x 300 DPI)

1  
2  
3  
4  
5  
6  
7  
8  
9  
10  
11  
12  
13  
14  
15  
16  
17  
18  
19  
20  
21  
22  
23  
24  
25  
26  
27  
28  
29  
30  
31  
32  
33  
34  
35  
36  
37  
38  
39  
40  
41  
42  
43  
44  
45  
46  
47  
48  
49  
50  
51  
52  
53  
54  
55  
56  
57  
58  
59  
60

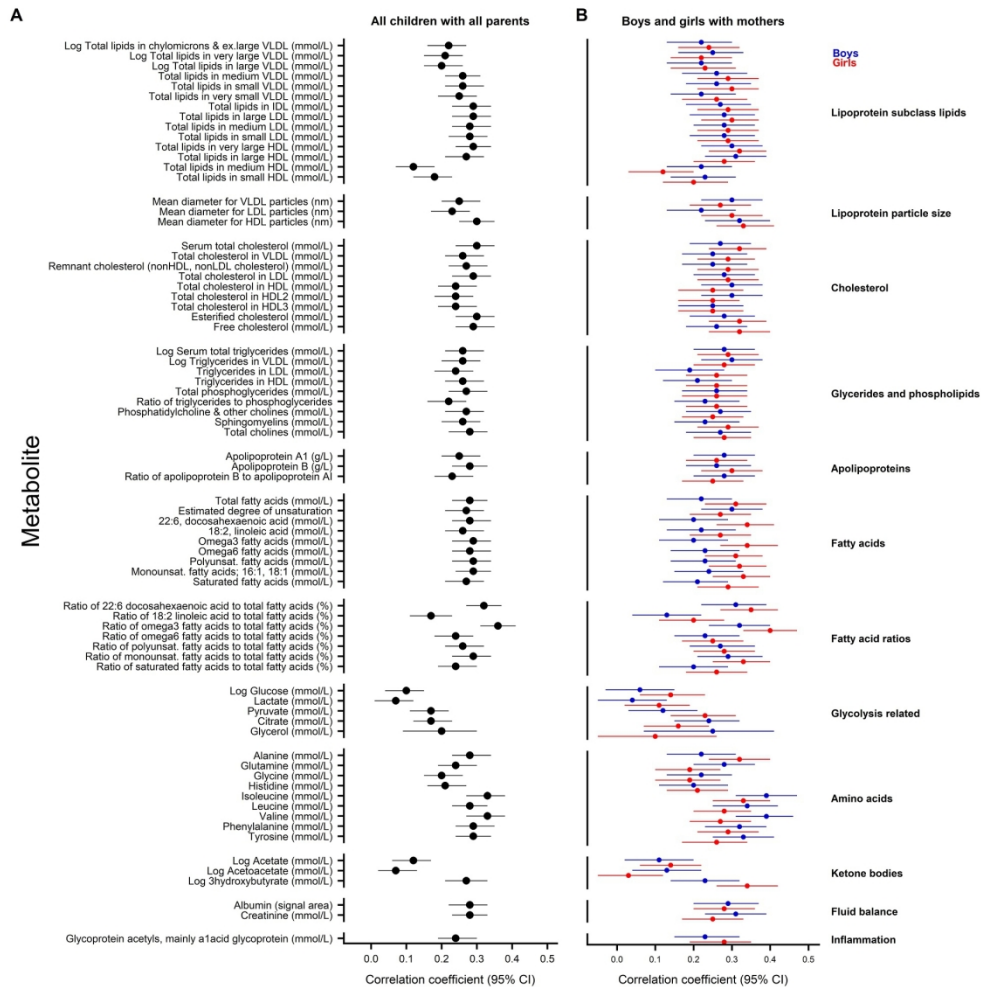

Figure 4: Parent:child correlation for metabolite measures. Pearson’s correlation coefficients for all children with all parents (A); and for boys (blue) with mothers and for girls (red) with mothers (B). Error bars represent 95% confidence intervals. Correlation coefficients with associated 95% confidence intervals are listed in supplementary table 5 and 6. HDL: High-density lipoprotein; IDL: Intermediate density lipoprotein; LDL: Low-density lipoprotein; VLDL: Very low density lipoprotein.

169x169mm (300 x 300 DPI)

Supplementary table 1: Weighted mean (SD)\* of metabolite measures in children and parents.

| Metabolic subgroup                                        | Children |        |       |        |        |       |      |        |       | Adults |        |       |        |        |       |      |        |       |
|-----------------------------------------------------------|----------|--------|-------|--------|--------|-------|------|--------|-------|--------|--------|-------|--------|--------|-------|------|--------|-------|
|                                                           | Male     |        |       | Female |        |       | All  |        |       | Male   |        |       | Female |        |       | All  |        |       |
|                                                           | n        | Mean   | SD    | n      | Mean   | SD    | n    | Mean   | SD    | n      | Mean   | SD    | n      | Mean   | SD    | n    | Mean   | SD    |
| <b>Lipoprotein subclass lipids</b>                        |          |        |       |        |        |       |      |        |       |        |        |       |        |        |       |      |        |       |
| Total lipids in chylomicrons & ex.large VLDL (mmol/L)*    | 575      | 0.005  | 4.826 | 605    | 0.011  | 3.260 | 1180 | 0.007  | 4.054 | 177    | 0.040  | 2.101 | 1148   | 0.013  | 2.822 | 1325 | 0.015  | 2.777 |
| Total lipids in very large VLDL (mmol/L)*                 | 575      | 0.006  | 6.246 | 605    | 0.014  | 4.800 | 1180 | 0.010  | 5.521 | 177    | 0.087  | 2.419 | 1148   | 0.022  | 3.458 | 1325 | 0.027  | 3.398 |
| Total lipids in large VLDL (mmol/L)*                      | 575      | 0.059  | 3.945 | 605    | 0.121  | 2.488 | 1180 | 0.085  | 3.234 | 177    | 0.423  | 1.287 | 1148   | 0.161  | 1.666 | 1325 | 0.182  | 1.665 |
| Total lipids in medium VLDL (mmol/L)                      | 575      | 0.441  | 0.270 | 605    | 0.478  | 0.272 | 1180 | 0.460  | 0.271 | 177    | 0.959  | 0.630 | 1148   | 0.548  | 0.366 | 1325 | 0.602  | 0.432 |
| Total lipids in small VLDL (mmol/L)                       | 575      | 0.381  | 0.153 | 605    | 0.405  | 0.146 | 1180 | 0.393  | 0.149 | 177    | 0.690  | 0.279 | 1148   | 0.494  | 0.216 | 1325 | 0.520  | 0.234 |
| Total lipids in very small VLDL (mmol/L)                  | 575      | 0.325  | 0.070 | 605    | 0.342  | 0.076 | 1180 | 0.334  | 0.073 | 177    | 0.451  | 0.111 | 1148   | 0.426  | 0.110 | 1325 | 0.429  | 0.110 |
| Total lipids in IDL (mmol/L)                              | 575      | 0.804  | 0.176 | 605    | 0.834  | 0.183 | 1180 | 0.819  | 0.180 | 177    | 0.985  | 0.261 | 1148   | 0.999  | 0.240 | 1325 | 0.997  | 0.242 |
| Total lipids in large LDL (mmol/L)                        | 575      | 0.917  | 0.220 | 605    | 0.941  | 0.228 | 1180 | 0.929  | 0.224 | 177    | 1.162  | 0.327 | 1148   | 1.155  | 0.298 | 1325 | 1.156  | 0.301 |
| Total lipids in medium LDL (mmol/L)                       | 575      | 0.511  | 0.136 | 605    | 0.519  | 0.140 | 1180 | 0.515  | 0.138 | 177    | 0.676  | 0.214 | 1148   | 0.655  | 0.185 | 1325 | 0.658  | 0.189 |
| Total lipids in small LDL (mmol/L)                        | 575      | 0.338  | 0.083 | 605    | 0.340  | 0.087 | 1180 | 0.339  | 0.085 | 177    | 0.439  | 0.135 | 1148   | 0.425  | 0.114 | 1325 | 0.427  | 0.117 |
| Total lipids in very large HDL (mmol/L)                   | 575      | 0.482  | 0.196 | 605    | 0.495  | 0.184 | 1180 | 0.488  | 0.189 | 177    | 0.320  | 0.189 | 1148   | 0.497  | 0.229 | 1325 | 0.474  | 0.232 |
| Total lipids in large HDL (mmol/L)                        | 575      | 0.874  | 0.291 | 605    | 0.859  | 0.275 | 1180 | 0.866  | 0.282 | 177    | 0.509  | 0.335 | 1148   | 0.900  | 0.382 | 1325 | 0.849  | 0.399 |
| Total lipids in medium HDL (mmol/L)                       | 575      | 0.917  | 0.127 | 605    | 0.871  | 0.126 | 1180 | 0.894  | 0.128 | 177    | 0.828  | 0.241 | 1148   | 0.971  | 0.175 | 1325 | 0.952  | 0.191 |
| Total lipids in small HDL (mmol/L)                        | 575      | 1.039  | 0.103 | 605    | 0.997  | 0.115 | 1180 | 1.018  | 0.111 | 177    | 1.055  | 0.254 | 1148   | 1.085  | 0.138 | 1325 | 1.081  | 0.157 |
| <b>Lipoprotein particle size</b>                          |          |        |       |        |        |       |      |        |       |        |        |       |        |        |       |      |        |       |
| Mean diameter for VLDL particles (nm)                     | 575      | 37.063 | 1.633 | 605    | 37.238 | 1.557 | 1180 | 37.152 | 1.591 | 177    | 38.527 | 1.737 | 1148   | 36.943 | 1.599 | 1325 | 37.152 | 1.701 |
| Mean diameter for LDL particles (nm)                      | 575      | 23.587 | 0.103 | 605    | 23.628 | 0.109 | 1180 | 23.608 | 0.107 | 177    | 23.487 | 0.093 | 1148   | 23.573 | 0.100 | 1325 | 23.562 | 0.104 |
| Mean diameter for HDL particles (nm)                      | 575      | 10.081 | 0.233 | 605    | 10.102 | 0.221 | 1180 | 10.092 | 0.226 | 177    | 9.798  | 0.244 | 1148   | 10.068 | 0.262 | 1325 | 10.032 | 0.275 |
| <b>Cholesterol</b>                                        |          |        |       |        |        |       |      |        |       |        |        |       |        |        |       |      |        |       |
| Serum total cholesterol (mmol/L)                          | 575      | 3.576  | 0.620 | 605    | 3.596  | 0.643 | 1180 | 3.586  | 0.629 | 177    | 4.161  | 0.885 | 1148   | 4.234  | 0.828 | 1325 | 4.225  | 0.835 |
| Total cholesterol in VLDL (mmol/L)                        | 575      | 0.438  | 0.188 | 605    | 0.472  | 0.189 | 1180 | 0.455  | 0.189 | 177    | 0.826  | 0.395 | 1148   | 0.592  | 0.265 | 1325 | 0.623  | 0.295 |
| Remnant cholesterol (nonHDL, nonLDL cholesterol) (mmol/L) | 575      | 0.944  | 0.269 | 605    | 0.994  | 0.271 | 1180 | 0.970  | 0.270 | 177    | 1.452  | 0.472 | 1148   | 1.219  | 0.383 | 1325 | 1.250  | 0.402 |
| Total cholesterol in LDL (mmol/L)                         | 575      | 1.130  | 0.330 | 605    | 1.149  | 0.341 | 1180 | 1.139  | 0.334 | 177    | 1.492  | 0.498 | 1148   | 1.460  | 0.442 | 1325 | 1.464  | 0.449 |
| Total cholesterol in HDL (mmol/L)                         | 575      | 1.503  | 0.274 | 605    | 1.453  | 0.266 | 1180 | 1.477  | 0.270 | 177    | 1.217  | 0.350 | 1148   | 1.556  | 0.363 | 1325 | 1.511  | 0.379 |
| Total cholesterol in HDL2 (mmol/L)                        | 575      | 1.035  | 0.254 | 605    | 0.988  | 0.246 | 1180 | 1.011  | 0.250 | 177    | 0.751  | 0.327 | 1148   | 1.072  | 0.335 | 1325 | 1.030  | 0.351 |
| Total cholesterol in HDL3 (mmol/L)                        | 575      | 0.468  | 0.024 | 605    | 0.466  | 0.024 | 1180 | 0.467  | 0.024 | 177    | 0.466  | 0.035 | 1148   | 0.483  | 0.033 | 1325 | 0.481  | 0.034 |
| Esterified cholesterol (mmol/L)                           | 572      | 2.516  | 0.447 | 604    | 2.517  | 0.460 | 1176 | 2.517  | 0.452 | 176    | 2.941  | 0.636 | 1147   | 2.975  | 0.593 | 1323 | 2.971  | 0.597 |
| Free cholesterol (mmol/L)                                 | 572      | 1.062  | 0.179 | 604    | 1.079  | 0.186 | 1176 | 1.070  | 0.182 | 176    | 1.211  | 0.273 | 1147   | 1.260  | 0.239 | 1323 | 1.253  | 0.244 |
| <b>Glycerides and phospholipids</b>                       |          |        |       |        |        |       |      |        |       |        |        |       |        |        |       |      |        |       |
| Serum total triglycerides (mmol/L)*                       | 575      | 0.918  | 0.709 | 605    | 1.005  | 0.681 | 1180 | 0.962  | 0.696 | 177    | 1.686  | 0.809 | 1148   | 1.129  | 0.755 | 1325 | 1.190  | 0.782 |
| Triglycerides in VLDL (mmol/L)*                           | 575      | 0.582  | 0.885 | 605    | 0.648  | 0.830 | 1180 | 0.615  | 0.858 | 177    | 1.249  | 0.927 | 1148   | 0.694  | 0.945 | 1325 | 0.750  | 0.972 |
| Triglycerides in LDL (mmol/L)                             | 575      | 0.113  | 0.024 | 605    | 0.123  | 0.027 | 1180 | 0.118  | 0.026 | 177    | 0.153  | 0.040 | 1148   | 0.158  | 0.044 | 1325 | 0.157  | 0.043 |
| Triglycerides in HDL (mmol/L)                             | 575      | 0.129  | 0.030 | 605    | 0.136  | 0.030 | 1180 | 0.133  | 0.030 | 177    | 0.161  | 0.047 | 1148   | 0.151  | 0.040 | 1325 | 0.153  | 0.041 |
| Total phosphoglycerides (mmol/L)                          | 572      | 1.632  | 0.240 | 604    | 1.620  | 0.261 | 1176 | 1.626  | 0.250 | 176    | 1.865  | 0.354 | 1147   | 1.926  | 0.340 | 1323 | 1.918  | 0.342 |
| Ratio of triglycerides to phosphoglycerides               | 572      | 0.526  | 0.253 | 604    | 0.569  | 0.277 | 1176 | 0.548  | 0.265 | 176    | 0.946  | 0.587 | 1147   | 0.580  | 0.279 | 1323 | 0.628  | 0.355 |
| Phosphatidylcholine & other cholines (mmol/L)             | 572      | 1.691  | 0.240 | 604    | 1.687  | 0.267 | 1176 | 1.689  | 0.253 | 175    | 1.877  | 0.320 | 1147   | 1.978  | 0.336 | 1322 | 1.965  | 0.335 |
| Sphingomyelins (mmol/L)                                   | 572      | 0.348  | 0.061 | 604    | 0.349  | 0.064 | 1176 | 0.348  | 0.062 | 175    | 0.370  | 0.070 | 1147   | 0.397  | 0.078 | 1322 | 0.394  | 0.077 |
| Total cholines (mmol/L)                                   | 572      | 2.005  | 0.256 | 604    | 1.997  | 0.264 | 1176 | 2.001  | 0.259 | 175    | 2.185  | 0.334 | 1147   | 2.317  | 0.351 | 1322 | 2.299  | 0.351 |
| <b>Apolipoproteins</b>                                    |          |        |       |        |        |       |      |        |       |        |        |       |        |        |       |      |        |       |
| Apolipoprotein A1 (g/L)                                   | 575      | 1.509  | 0.159 | 605    | 1.484  | 0.151 | 1180 | 1.497  | 0.155 | 177    | 1.461  | 0.178 | 1148   | 1.589  | 0.205 | 1325 | 1.572  | 0.206 |
| Apolipoprotein B (g/L)                                    | 575      | 0.682  | 0.135 | 604    | 0.706  | 0.136 | 1179 | 0.694  | 0.135 | 177    | 0.955  | 0.245 | 1148   | 0.812  | 0.196 | 1325 | 0.831  | 0.208 |
| Ratio of apolipoprotein B to apolipoprotein A             | 575      | 0.455  | 0.097 | 604    | 0.479  | 0.098 | 1179 | 0.467  | 0.098 | 177    | 0.660  | 0.178 | 1148   | 0.518  | 0.136 | 1325 | 0.537  | 0.150 |
| <b>Fatty acids</b>                                        |          |        |       |        |        |       |      |        |       |        |        |       |        |        |       |      |        |       |
| Total fatty acids (mmol/L)                                | 570      | 9.215  | 1.697 | 604    | 9.370  | 1.730 | 1174 | 9.294  | 1.709 | 173    | 11.850 | 2.723 | 1145   | 10.917 | 2.392 | 1318 | 11.034 | 2.446 |
| Estimated degree of unsaturation                          | 570      | 1.212  | 0.056 | 604    | 1.196  | 0.065 | 1174 | 1.204  | 0.061 | 173    | 1.179  | 0.070 | 1145   | 1.212  | 0.066 | 1318 | 1.208  | 0.068 |
| 22:6, docosahexaenoic acid (mmol/L)                       | 570      | 0.078  | 0.028 | 604    | 0.074  | 0.029 | 1174 | 0.076  | 0.028 | 173    | 0.118  | 0.051 | 1145   | 0.111  | 0.039 | 1318 | 0.112  | 0.041 |
| 18:2, linoleic acid (mmol/L)                              | 570      | 2.539  | 0.456 | 604    | 2.592  | 0.464 | 1174 | 2.566  | 0.459 | 173    | 2.919  | 0.567 | 1145   | 2.880  | 0.584 | 1318 | 2.885  | 0.580 |
| Omega3 fatty acids (mmol/L)                               | 570      | 0.309  | 0.086 | 604    | 0.296  | 0.083 | 1174 | 0.302  | 0.085 | 173    | 0.451  | 0.160 | 1145   | 0.400  | 0.117 | 1318 | 0.406  | 0.124 |
| Omega6 fatty acids (mmol/L)                               | 570      | 3.077  | 0.493 | 604    | 3.094  | 0.492 | 1174 | 3.086  | 0.491 | 173    | 3.553  | 0.648 | 1145   | 3.507  | 0.627 | 1318 | 3.513  | 0.628 |
| Polyunsat. fatty acids (mmol/L)                           | 570      | 3.386  | 0.565 | 604    | 3.390  | 0.561 | 1174 | 3.388  | 0.560 | 173    | 4.004  | 0.775 | 1145   | 3.907  | 0.721 | 1318 | 3.919  | 0.726 |
| Monounsat. fatty acids; 16:1, 18:1 (mmol/L)               | 570      | 2.500  | 0.632 | 604    | 2.587  | 0.661 | 1174 | 2.544  | 0.646 | 173    | 3.520  | 1.058 | 1145   | 3.080  | 0.917 | 1318 | 3.135  | 0.943 |
| Saturated fatty acids (mmol/L)                            | 570      | 3.328  | 0.642 | 604    | 3.393  | 0.682 | 1174 | 3.362  | 0.661 | 173    | 4.325  | 1.088 | 1145   | 3.930  | 0.932 | 1318 | 3.979  | 0.958 |



1  
2  
3  
4  
5  
6  
7  
8  
9  
10  
11  
12  
13  
14  
15  
16  
17  
18  
19  
20  
21  
22  
23  
24  
25  
26  
27  
28  
29  
30  
31  
32  
33  
34  
35  
36  
37  
38  
39  
40  
41  
42  
43  
44  
45  
46  
47

**Fatty acid ratios**

|                                                             |     |        |       |     |        |       |      |        |       |     |        |       |      |        |       |      |        |       |
|-------------------------------------------------------------|-----|--------|-------|-----|--------|-------|------|--------|-------|-----|--------|-------|------|--------|-------|------|--------|-------|
| Ratio of 22:6 docosahexaenoic acid to total fatty acids (%) | 570 | 0.841  | 0.239 | 604 | 0.790  | 0.269 | 1174 | 0.815  | 0.255 | 173 | 0.984  | 0.315 | 1145 | 1.023  | 0.284 | 1318 | 1.018  | 0.287 |
| Ratio of 18:2 linoleic acid to total fatty acids (%)        | 570 | 27.741 | 3.127 | 604 | 27.867 | 3.274 | 1174 | 27.805 | 3.191 | 173 | 25.038 | 3.570 | 1145 | 26.656 | 3.417 | 1318 | 26.453 | 3.467 |
| Ratio of omega3 fatty acids to total fatty acids (%)        | 570 | 3.329  | 0.579 | 604 | 3.150  | 0.600 | 1174 | 3.238  | 0.594 | 173 | 3.763  | 0.799 | 1145 | 3.659  | 0.697 | 1318 | 3.672  | 0.709 |
| Ratio of omega6 fatty acids to total fatty acids (%)        | 570 | 33.650 | 3.047 | 604 | 33.308 | 3.228 | 1174 | 33.475 | 3.133 | 173 | 30.468 | 3.757 | 1145 | 32.502 | 3.311 | 1318 | 32.247 | 3.424 |
| Ratio of polyunsat. fatty acids to total fatty acids (%)    | 570 | 36.979 | 3.235 | 604 | 36.459 | 3.514 | 1174 | 36.713 | 3.377 | 173 | 34.231 | 3.878 | 1145 | 36.161 | 3.588 | 1318 | 35.918 | 3.669 |
| Ratio of monounsat. fatty acids to total fatty acids (%)    | 570 | 26.911 | 2.569 | 604 | 27.375 | 2.678 | 1174 | 27.148 | 2.625 | 173 | 29.366 | 2.968 | 1145 | 27.889 | 2.842 | 1318 | 28.075 | 2.891 |
| Ratio of saturated fatty acids to total fatty acids (%)     | 570 | 36.110 | 1.675 | 604 | 36.167 | 1.802 | 1174 | 36.139 | 1.734 | 173 | 36.402 | 2.027 | 1145 | 35.950 | 2.032 | 1318 | 36.007 | 2.031 |

**Glycolysis related**

|                    |     |       |       |     |       |       |      |       |       |     |       |       |      |       |       |      |       |       |
|--------------------|-----|-------|-------|-----|-------|-------|------|-------|-------|-----|-------|-------|------|-------|-------|------|-------|-------|
| Glucose (mmol/L)*  | 574 | 1.350 | 0.115 | 605 | 1.336 | 0.105 | 1179 | 1.342 | 0.11  | 176 | 1.415 | 0.205 | 1148 | 1.334 | 0.176 | 1324 | 1.344 | 0.182 |
| Lactate (mmol/L)   | 575 | 1.770 | 0.459 | 605 | 1.718 | 0.434 | 1180 | 1.743 | 0.446 | 177 | 1.696 | 0.472 | 1148 | 1.562 | 0.480 | 1325 | 1.580 | 0.480 |
| Pyruvate (mmol/L)  | 574 | 0.100 | 0.024 | 605 | 0.098 | 0.023 | 1179 | 0.099 | 0.023 | 177 | 0.101 | 0.031 | 1147 | 0.093 | 0.034 | 1324 | 0.094 | 0.033 |
| Citrate (mmol/L)   | 575 | 0.125 | 0.017 | 604 | 0.131 | 0.018 | 1179 | 0.128 | 0.018 | 177 | 0.110 | 0.016 | 1148 | 0.111 | 0.016 | 1325 | 0.111 | 0.016 |
| Glycerol (mmol/L)# | 240 | 0.078 | 0.021 | 283 | 0.083 | 0.022 | 523  | 0.081 | 0.021 | 84  | 0.073 | 0.021 | 470  | 0.071 | 0.023 | 554  | 0.071 | 0.023 |

**Amino acids**

|                        |     |       |       |     |       |       |      |       |       |     |       |       |      |       |       |      |       |       |
|------------------------|-----|-------|-------|-----|-------|-------|------|-------|-------|-----|-------|-------|------|-------|-------|------|-------|-------|
| Alanine (mmol/L)       | 575 | 0.387 | 0.061 | 605 | 0.396 | 0.060 | 1180 | 0.391 | 0.060 | 176 | 0.423 | 0.065 | 1147 | 0.399 | 0.060 | 1323 | 0.402 | 0.061 |
| Glutamine (mmol/L)     | 575 | 0.474 | 0.050 | 605 | 0.497 | 0.051 | 1180 | 0.485 | 0.051 | 177 | 0.490 | 0.063 | 1148 | 0.456 | 0.066 | 1325 | 0.461 | 0.066 |
| Glycine (mmol/L)       | 574 | 0.261 | 0.032 | 604 | 0.270 | 0.034 | 1178 | 0.265 | 0.033 | 176 | 0.243 | 0.029 | 1148 | 0.274 | 0.061 | 1324 | 0.270 | 0.059 |
| Histidine (mmol/L)     | 574 | 0.065 | 0.009 | 605 | 0.065 | 0.008 | 1179 | 0.065 | 0.008 | 176 | 0.066 | 0.008 | 1148 | 0.065 | 0.009 | 1324 | 0.065 | 0.009 |
| Isoleucine (mmol/L)    | 574 | 0.054 | 0.019 | 605 | 0.053 | 0.019 | 1179 | 0.054 | 0.019 | 174 | 0.072 | 0.021 | 1146 | 0.055 | 0.020 | 1320 | 0.057 | 0.021 |
| Leucine (mmol/L)       | 575 | 0.073 | 0.019 | 605 | 0.071 | 0.019 | 1180 | 0.072 | 0.019 | 177 | 0.097 | 0.029 | 1148 | 0.074 | 0.021 | 1325 | 0.077 | 0.023 |
| Valine (mmol/L)        | 575 | 0.162 | 0.037 | 604 | 0.156 | 0.035 | 1179 | 0.159 | 0.036 | 177 | 0.192 | 0.036 | 1147 | 0.162 | 0.042 | 1324 | 0.166 | 0.042 |
| Phenylalanine (mmol/L) | 575 | 0.068 | 0.009 | 605 | 0.066 | 0.009 | 1180 | 0.067 | 0.009 | 177 | 0.073 | 0.011 | 1148 | 0.072 | 0.011 | 1325 | 0.073 | 0.011 |
| Tyrosine (mmol/L)      | 574 | 0.054 | 0.014 | 605 | 0.055 | 0.014 | 1179 | 0.055 | 0.014 | 176 | 0.060 | 0.013 | 1148 | 0.054 | 0.015 | 1324 | 0.055 | 0.015 |

**Ketone bodies**

|                             |     |       |       |     |       |       |      |       |       |     |       |       |      |       |       |      |       |       |
|-----------------------------|-----|-------|-------|-----|-------|-------|------|-------|-------|-----|-------|-------|------|-------|-------|------|-------|-------|
| Acetate (mmol/L)*           | 575 | 0.031 | 0.423 | 605 | 0.030 | 0.404 | 1180 | 0.030 | 0.413 | 177 | 0.037 | 0.655 | 1146 | 0.033 | 0.600 | 1323 | 0.034 | 0.609 |
| Acetoacetate (mmol/L)*      | 575 | 0.025 | 1.310 | 605 | 0.023 | 1.429 | 1180 | 0.024 | 1.367 | 177 | 0.023 | 2.116 | 1147 | 0.024 | 1.278 | 1324 | 0.024 | 1.403 |
| 3hydroxybutyrate (mmol/L)*# | 555 | 0.100 | 0.786 | 580 | 0.103 | 0.826 | 1135 | 0.101 | 0.805 | 170 | 0.104 | 0.669 | 1098 | 0.096 | 0.781 | 1268 | 0.097 | 0.769 |

**Fluid balance**

|                       |     |       |       |     |       |       |      |       |       |     |       |       |      |       |       |      |       |       |
|-----------------------|-----|-------|-------|-----|-------|-------|------|-------|-------|-----|-------|-------|------|-------|-------|------|-------|-------|
| Albumin (signal area) | 574 | 0.093 | 0.005 | 605 | 0.092 | 0.005 | 1179 | 0.093 | 0.005 | 177 | 0.090 | 0.005 | 1148 | 0.088 | 0.005 | 1325 | 0.089 | 0.005 |
| Creatinine (mmol/L)   | 570 | 0.040 | 0.006 | 600 | 0.040 | 0.006 | 1170 | 0.040 | 0.006 | 173 | 0.066 | 0.015 | 1139 | 0.054 | 0.009 | 1312 | 0.055 | 0.010 |

**Inflammation**

|                                                           |     |       |       |     |       |       |      |       |       |     |       |       |      |       |       |      |       |       |
|-----------------------------------------------------------|-----|-------|-------|-----|-------|-------|------|-------|-------|-----|-------|-------|------|-------|-------|------|-------|-------|
| Glycoprotein acetyls, mainly a1acid glycoprotein (mmol/L) | 575 | 1.170 | 0.191 | 605 | 1.173 | 0.186 | 1180 | 1.172 | 0.188 | 177 | 1.375 | 0.366 | 1148 | 1.242 | 0.233 | 1325 | 1.260 | 0.258 |
|-----------------------------------------------------------|-----|-------|-------|-----|-------|-------|------|-------|-------|-----|-------|-------|------|-------|-------|------|-------|-------|

\* geometric mean [relative SD] when skewed variable

# Note: The presence of ethanol in a sample can affect quantification of glycerol and on some occasions 3hydroxybutyrate. Ethanol can be introduced in to a sample from disinfectants used during blood collection/processing of sample.

Supplementary table 2: Mean difference in metabolite levels in adults compared to children in absolute concentration unit

| Metabolic subgroup                                        | Differences by age (Adults - Child) |                  |         |              | Conversion factor (SD) # |
|-----------------------------------------------------------|-------------------------------------|------------------|---------|--------------|--------------------------|
|                                                           | Estimate                            | 95% CI           | P-value | Adj_p-value^ |                          |
| <b>Lipoprotein subclass lipids</b>                        |                                     |                  |         |              |                          |
| Total lipids in chylomicrons & ex.large VLDL (mmol/L)*    | 0.704                               | (0.519, 0.890)   | <0.001  | <0.001       | 2.534                    |
| Total lipids in very large VLDL (mmol/L)*                 | 0.922                               | (0.700, 1.145)   | <0.001  | <0.001       | 3.031                    |
| Total lipids in large VLDL (mmol/L)*                      | 0.648                               | (0.502, 0.795)   | <0.001  | <0.001       | 1.950                    |
| Total lipids in medium VLDL (mmol/L)                      | 0.105                               | (0.080, 0.129)   | <0.001  | <0.001       | 0.348                    |
| Total lipids in small VLDL (mmol/L)                       | 0.107                               | (0.094, 0.121)   | <0.001  | <0.001       | 0.199                    |
| Total lipids in very small VLDL (mmol/L)                  | 0.093                               | (0.086, 0.099)   | <0.001  | <0.001       | 0.104                    |
| Total lipids in IDL (mmol/L)                              | 0.181                               | (0.166, 0.196)   | <0.001  | <0.001       | 0.230                    |
| Total lipids in large LDL (mmol/L)                        | 0.229                               | (0.211, 0.247)   | <0.001  | <0.001       | 0.286                    |
| Total lipids in medium LDL (mmol/L)                       | 0.144                               | (0.132, 0.155)   | <0.001  | <0.001       | 0.178                    |
| Total lipids in small LDL (mmol/L)                        | 0.089                               | (0.082, 0.096)   | <0.001  | <0.001       | 0.110                    |
| Total lipids in very large HDL (mmol/L)                   | 0.012                               | (-0.003, 0.027)  | 0.128   | 0.132        | 0.217                    |
| Total lipids in large HDL (mmol/L)                        | 0.032                               | (0.007, 0.057)   | 0.011   | 0.012        | 0.353                    |
| Total lipids in medium HDL (mmol/L)                       | 0.076                               | (0.064, 0.089)   | <0.001  | <0.001       | 0.166                    |
| Total lipids in small HDL (mmol/L)                        | 0.068                               | (0.058, 0.078)   | <0.001  | <0.001       | 0.137                    |
| <b>Lipoprotein particle size</b>                          |                                     |                  |         |              |                          |
| Mean diameter for VLDL particles (nm)                     | -0.147                              | (-0.263, -0.031) | 0.013   | 0.014        | 1.633                    |
| Mean diameter for LDL particles (nm)                      | -0.044                              | (-0.052, -0.037) | <0.001  | <0.001       | 0.106                    |
| Mean diameter for HDL particles (nm)                      | -0.027                              | (-0.045, -0.010) | 0.002   | 0.003        | 0.256                    |
| <b>Cholesterol</b>                                        |                                     |                  |         |              |                          |
| Serum total cholesterol (mmol/L)                          | 0.670                               | (0.619, 0.721)   | <0.001  | <0.001       | 0.805                    |
| Total cholesterol in VLDL (mmol/L)                        | 0.146                               | (0.129, 0.163)   | <0.001  | <0.001       | 0.249                    |
| Remnant cholesterol (nonHDL, nonLDL cholesterol) (mmol/L) | 0.261                               | (0.237, 0.284)   | <0.001  | <0.001       | 0.357                    |
| Total cholesterol in LDL (mmol/L)                         | 0.327                               | (0.300, 0.354)   | <0.001  | <0.001       | 0.424                    |
| Total cholesterol in HDL (mmol/L)                         | 0.082                               | (0.058, 0.106)   | <0.001  | <0.001       | 0.337                    |
| Total cholesterol in HDL2 (mmol/L)                        | 0.064                               | (0.042, 0.086)   | <0.001  | <0.001       | 0.311                    |
| Total cholesterol in HDL3 (mmol/L)                        | 0.018                               | (0.016, 0.020)   | <0.001  | <0.001       | 0.031                    |
| Esterified cholesterol (mmol/L)                           | 0.474                               | (0.437, 0.511)   | <0.001  | <0.001       | 0.576                    |
| Free cholesterol (mmol/L)                                 | 0.195                               | (0.180, 0.210)   | <0.001  | <0.001       | 0.234                    |
| <b>Glycerides and phospholipids</b>                       |                                     |                  |         |              |                          |
| Serum total triglycerides (mmol/L)*                       | 0.176                               | (0.145, 0.206)   | <0.001  | <0.001       | 0.443                    |
| Triglycerides in VLDL (mmol/L)*                           | 0.140                               | (0.096, 0.183)   | <0.001  | <0.001       | 0.615                    |
| Triglycerides in LDL (mmol/L)                             | 0.040                               | (0.038, 0.043)   | <0.001  | <0.001       | 0.042                    |
| Triglycerides in HDL (mmol/L)                             | 0.020                               | (0.017, 0.022)   | <0.001  | <0.001       | 0.037                    |
| Total phosphoglycerides (mmol/L)                          | 0.311                               | (0.290, 0.332)   | <0.001  | <0.001       | 0.337                    |
| Ratio of triglycerides to phosphoglycerides               | 0.049                               | (0.027, 0.071)   | <0.001  | <0.001       | 0.299                    |
| Phosphatidylcholine & other cholines (mmol/L)             | 0.295                               | (0.274, 0.316)   | <0.001  | <0.001       | 0.329                    |
| Sphingomyelins (mmol/L)                                   | 0.052                               | (0.047, 0.057)   | <0.001  | <0.001       | 0.075                    |
| Total cholines (mmol/L)                                   | 0.323                               | (0.302, 0.345)   | <0.001  | <0.001       | 0.347                    |
| <b>Apolipoproteins</b>                                    |                                     |                  |         |              |                          |
| Apolipoprotein A1 (g/L)                                   | 0.099                               | (0.086, 0.112)   | <0.001  | <0.001       | 0.191                    |
| Apolipoprotein B (g/L)                                    | 0.125                               | (0.113, 0.137)   | <0.001  | <0.001       | 0.182                    |
| Ratio of apolipoprotein B to apolipoprotein A1            | 0.055                               | (0.046, 0.064)   | <0.001  | <0.001       | 0.127                    |
| <b>Fatty acids</b>                                        |                                     |                  |         |              |                          |
| Total fatty acids (mmol/L)                                | 1.738                               | (1.592, 1.885)   | <0.001  | <0.001       | 2.245                    |
| Estimated degree of unsaturation                          | 0.005                               | (0.000, 0.009)   | 0.030   | 0.031        | 0.063                    |
| 22:6, docosahexaenoic acid (mmol/L)                       | 0.037                               | (0.035, 0.040)   | <0.001  | <0.001       | 0.040                    |
| 18:2, linoleic acid (mmol/L)                              | 0.347                               | (0.310, 0.384)   | <0.001  | <0.001       | 0.545                    |
| Omega3 fatty acids (mmol/L)                               | 0.105                               | (0.098, 0.113)   | <0.001  | <0.001       | 0.118                    |
| Omega6 fatty acids (mmol/L)                               | 0.453                               | (0.414, 0.492)   | <0.001  | <0.001       | 0.597                    |
| Polyunsat. fatty acids (mmol/L)                           | 0.558                               | (0.513, 0.603)   | <0.001  | <0.001       | 0.695                    |
| Monounsat. fatty acids; 16:1, 18:1 (mmol/L)               | 0.568                               | (0.512, 0.625)   | <0.001  | <0.001       | 0.850                    |
| Saturated fatty acids (mmol/L)                            | 0.612                               | (0.554, 0.669)   | <0.001  | <0.001       | 0.862                    |

**Fatty acid ratios**

|                                                             |        |                  |        |        |       |
|-------------------------------------------------------------|--------|------------------|--------|--------|-------|
| Ratio of 22:6 docosahexaenoic acid to total fatty acids (%) | 0.209  | (0.190, 0.228)   | <0.001 | <0.001 | 0.292 |
| Ratio of 18:2 linoleic acid to total fatty acids (%)        | -1.079 | (-1.331, -0.827) | <0.001 | <0.001 | 3.387 |
| Ratio of omega3 fatty acids to total fatty acids (%)        | 0.446  | (0.403, 0.490)   | <0.001 | <0.001 | 0.693 |
| Ratio of omega6 fatty acids to total fatty acids (%)        | -0.992 | (-1.227, -0.757) | <0.001 | <0.001 | 3.296 |
| Ratio of polyunsat. fatty acids to total fatty acids (%)    | -0.546 | (-0.794, -0.298) | <0.001 | <0.001 | 3.507 |
| Ratio of monounsat. fatty acids to total fatty acids (%)    | 0.741  | (0.547, 0.934)   | <0.001 | <0.001 | 2.797 |
| Ratio of saturated fatty acids to total fatty acids (%)     | -0.195 | (-0.328, -0.062) | 0.004  | 0.005  | 1.863 |

**Glycolysis related**

|                   |        |                  |        |        |       |
|-------------------|--------|------------------|--------|--------|-------|
| Glucose (mmol/L)* | -0.002 | (-0.014, 0.009)  | 0.700  | 0.709  | 0.147 |
| Lactate (mmol/L)  | -0.180 | (-0.215, -0.144) | <0.001 | <0.001 | 0.471 |
| Pyruvate (mmol/L) | -0.007 | (-0.009, -0.005) | <0.001 | <0.001 | 0.029 |
| Citrate (mmol/L)  | -0.017 | (-0.018, -0.016) | <0.001 | <0.001 | 0.019 |
| Glycerol (mmol/L) | -0.011 | (-0.015, -0.008) | <0.001 | <0.001 | 0.023 |

**Amino acids**

|                        |        |                  |        |        |       |
|------------------------|--------|------------------|--------|--------|-------|
| Alanine (mmol/L)       | 0.013  | (0.009, 0.017)   | <0.001 | <0.001 | 0.060 |
| Glutamine (mmol/L)     | -0.023 | (-0.027, -0.019) | <0.001 | <0.001 | 0.060 |
| Glycine (mmol/L)       | 0.007  | (0.003, 0.010)   | <0.001 | <0.001 | 0.049 |
| Histidine (mmol/L)     | 0.001  | (0.000, 0.002)   | 0.005  | 0.006  | 0.009 |
| Isoleucine (mmol/L)    | 0.003  | (0.002, 0.004)   | <0.001 | <0.001 | 0.019 |
| Leucine (mmol/L)       | 0.004  | (0.003, 0.006)   | <0.001 | <0.001 | 0.021 |
| Valine (mmol/L)        | 0.009  | (0.006, 0.011)   | <0.001 | <0.001 | 0.039 |
| Phenylalanine (mmol/L) | 0.005  | (0.005, 0.006)   | <0.001 | <0.001 | 0.010 |
| Tyrosine (mmol/L)      | 0.001  | (-0.000, 0.002)  | 0.100  | 0.105  | 0.014 |

**Ketone bodies**

|                            |        |                  |        |        |       |
|----------------------------|--------|------------------|--------|--------|-------|
| Acetate (mmol/L)*          | 0.101  | (0.084, 0.117)   | <0.001 | <0.001 | 0.235 |
| Acetoacetate (mmol/L)*     | -0.004 | (-0.086, 0.078)  | 0.922  | 0.922  | 1.022 |
| 3hydroxybutyrate (mmol/L)* | -0.064 | (-0.100, -0.028) | 0.001  | 0.001  | 0.493 |

**Fluid balance**

|                       |        |                  |        |        |       |
|-----------------------|--------|------------------|--------|--------|-------|
| Albumin (signal area) | -0.004 | (-0.004, -0.004) | <0.001 | <0.001 | 0.005 |
| Creatinine (mmol/L)   | 0.016  | (0.015, 0.017)   | <0.001 | 0.001  | 0.012 |

**Inflammation**

|                                                           |       |                |        |        |       |
|-----------------------------------------------------------|-------|----------------|--------|--------|-------|
| Glycoprotein acetyls, mainly a1acid glycoprotein (mmol/L) | 0.062 | (0.047, 0.078) | <0.001 | <0.001 | 0.217 |
|-----------------------------------------------------------|-------|----------------|--------|--------|-------|

\* Metabolite has been log transformed

^ Benjamini-Hochberg adjusted p-value

# Associations in Figure 2 are presented in SD-units. The conversion factor provided (unweighted standard deviation of each metabolite measure) can be used to convert the association in absolute concentration to SD units by dividing by the conversion factor. Where metabolite has been log transformed conversion factor is standard deviation of log transformed metabolite

Supplementary table 3: Differences in mean metabolite levels in girls compared to boys in absolute concentration units.

| Metabolic subgroup                                          | Differences for children (Female - Male) |                  |        |                          |                          |
|-------------------------------------------------------------|------------------------------------------|------------------|--------|--------------------------|--------------------------|
|                                                             | Estimate                                 | 95% CI           | pvalue | Adj_p-value <sup>^</sup> | Conversion factor (SD) # |
| <b>Lipoprotein subclass lipids</b>                          |                                          |                  |        |                          |                          |
| Total lipids in chylomicrons & ex.large VLDL (mmol/L)*      | 0.737                                    | (0.414, 1.059)   | <0.001 | <0.001                   | 2.845                    |
| Total lipids in very large VLDL (mmol/L)*                   | 0.744                                    | (0.355, 1.134)   | <0.001 | 0.001                    | 3.428                    |
| Total lipids in large VLDL (mmol/L)*                        | 0.663                                    | (0.390, 0.936)   | <0.001 | <0.001                   | 2.411                    |
| Total lipids in medium VLDL (mmol/L)                        | 0.049                                    | (0.018, 0.080)   | 0.002  | 0.004                    | 0.269                    |
| Total lipids in small VLDL (mmol/L)                         | 0.032                                    | (0.015, 0.048)   | <0.001 | 0.001                    | 0.146                    |
| Total lipids in very small VLDL (mmol/L)                    | 0.018                                    | (0.010, 0.027)   | <0.001 | <0.001                   | 0.074                    |
| Total lipids in IDL (mmol/L)                                | 0.025                                    | (0.004, 0.046)   | 0.017  | 0.035                    | 0.182                    |
| Total lipids in large LDL (mmol/L)                          | 0.020                                    | (-0.006, 0.046)  | 0.132  | 0.187                    | 0.227                    |
| Total lipids in medium LDL (mmol/L)                         | 0.008                                    | (-0.008, 0.024)  | 0.338  | 0.416                    | 0.139                    |
| Total lipids in small LDL (mmol/L)                          | 0.001                                    | (-0.008, 0.011)  | 0.788  | 0.822                    | 0.086                    |
| Total lipids in very large HDL (mmol/L)                     | -0.002                                   | (-0.023, 0.020)  | 0.882  | 0.882                    | 0.190                    |
| Total lipids in large HDL (mmol/L)                          | -0.033                                   | (-0.066, -0.001) | 0.044  | 0.074                    | 0.283                    |
| Total lipids in medium HDL (mmol/L)                         | -0.045                                   | (-0.059, -0.030) | <0.001 | <0.001                   | 0.131                    |
| Total lipids in small HDL (mmol/L)                          | -0.035                                   | (-0.048, -0.022) | <0.001 | <0.001                   | 0.116                    |
| <b>Lipoprotein particle size</b>                            |                                          |                  |        |                          |                          |
| Mean diameter for VLDL particles (nm)                       | 0.215                                    | (0.035, 0.395)   | 0.019  | 0.038                    | 1.580                    |
| Mean diameter for LDL particles (nm)                        | 0.035                                    | (0.023, 0.047)   | <0.001 | 0.000                    | 0.108                    |
| Mean diameter for HDL particles (nm)                        | 0.003                                    | (-0.023, 0.028)  | 0.847  | 0.870                    | 0.226                    |
| <b>Cholesterol</b>                                          |                                          |                  |        |                          |                          |
| Serum total cholesterol (mmol/L)                            | 0.007                                    | (-0.066, 0.079)  | 0.857  | 0.869                    | 0.634                    |
| Total cholesterol in VLDL (mmol/L)                          | 0.040                                    | (0.019, 0.061)   | <0.001 | 0.001                    | 0.184                    |
| Remnant cholesterol (nonHDL, nonLDL cholesterol) (mmol/L)   | 0.053                                    | (0.023, 0.083)   | 0.001  | 0.002                    | 0.265                    |
| Total cholesterol in LDL (mmol/L)                           | 0.016                                    | (-0.023, 0.054)  | 0.427  | 0.518                    | 0.336                    |
| Total cholesterol in HDL (mmol/L)                           | -0.062                                   | (-0.093, -0.031) | <0.001 | <0.001                   | 0.273                    |
| Total cholesterol in HDL2 (mmol/L)                          | -0.059                                   | (-0.087, -0.030) | <0.001 | <0.001                   | 0.253                    |
| Total cholesterol in HDL3 (mmol/L)                          | -0.003                                   | (-0.006, -0.001) | 0.013  | 0.027                    | 0.024                    |
| Esterified cholesterol (mmol/L)                             | -0.008                                   | (-0.060, 0.044)  | 0.755  | 0.798                    | 0.455                    |
| Free cholesterol (mmol/L)                                   | 0.013                                    | (-0.008, 0.034)  | 0.211  | 0.284                    | 0.184                    |
| <b>Glycerides and phospholipids</b>                         |                                          |                  |        |                          |                          |
| Serum total triglycerides (mmol/L)*                         | 0.101                                    | (0.056, 0.145)   | <0.001 | <0.001                   | 0.390                    |
| Triglycerides in VLDL (mmol/L)*                             | 0.125                                    | (0.062, 0.187)   | <0.001 | <0.001                   | 0.551                    |
| Triglycerides in LDL (mmol/L)                               | 0.009                                    | (0.006, 0.012)   | <0.001 | <0.001                   | 0.026                    |
| Triglycerides in HDL (mmol/L)                               | 0.007                                    | (0.004, 0.011)   | <0.001 | <0.001                   | 0.029                    |
| Total phosphoglycerides (mmol/L)                            | -0.018                                   | (-0.047, 0.010)  | 0.206  | 0.282                    | 0.249                    |
| Ratio of triglycerides to phosphoglycerides                 | 0.051                                    | (0.020, 0.083)   | 0.001  | 0.003                    | 0.274                    |
| Phosphatidylcholine & other cholines (mmol/L)               | -0.011                                   | (-0.040, 0.018)  | 0.447  | 0.534                    | 0.251                    |
| Sphingomyelins (mmol/L)                                     | -0.001                                   | (-0.009, 0.006)  | 0.706  | 0.757                    | 0.063                    |
| Total cholines (mmol/L)                                     | -0.017                                   | (-0.046, 0.013)  | 0.268  | 0.354                    | 0.257                    |
| <b>Apolipoproteins</b>                                      |                                          |                  |        |                          |                          |
| Apolipoprotein A1 (g/L)                                     | -0.030                                   | (-0.048, -0.013) | 0.001  | 0.002                    | 0.155                    |
| Apolipoprotein B (g/L)                                      | 0.027                                    | (0.012, 0.042)   | 0.001  | 0.002                    | 0.133                    |
| Ratio of apolipoprotein B to apolipoprotein A1              | 0.027                                    | (0.016, 0.038)   | <0.001 | <0.001                   | 0.098                    |
| <b>Fatty acids</b>                                          |                                          |                  |        |                          |                          |
| Total fatty acids (mmol/L)                                  | 0.200                                    | (0.011, 0.389)   | 0.038  | 0.065                    | 1.650                    |
| Estimated degree of unsaturation                            | -0.016                                   | (-0.022, -0.009) | <0.001 | <0.001                   | 0.060                    |
| 22:6, docosahexaenoic acid (mmol/L)                         | -0.004                                   | (-0.007, -0.000) | 0.033  | 0.059                    | 0.028                    |
| 18:2, linoleic acid (mmol/L)                                | 0.068                                    | (0.015, 0.120)   | 0.011  | 0.024                    | 0.458                    |
| Omega3 fatty acids (mmol/L)                                 | -0.008                                   | (-0.018, 0.001)  | 0.083  | 0.128                    | 0.084                    |
| Omega6 fatty acids (mmol/L)                                 | 0.031                                    | (-0.024, 0.087)  | 0.271  | 0.352                    | 0.485                    |
| Polyunsat. fatty acids (mmol/L)                             | 0.023                                    | (-0.041, 0.086)  | 0.483  | 0.567                    | 0.553                    |
| Monounsat. fatty acids; 16:1, 18:1 (mmol/L)                 | 0.105                                    | (0.034, 0.176)   | 0.004  | 0.009                    | 0.623                    |
| Saturated fatty acids (mmol/L)                              | 0.073                                    | (-0.000, 0.146)  | 0.052  | 0.085                    | 0.638                    |
| <b>Fatty acid ratios</b>                                    |                                          |                  |        |                          |                          |
| Ratio of 22:6 docosahexaenoic acid to total fatty acids (%) | -0.049                                   | (-0.078, -0.019) | 0.001  | 0.003                    | 0.255                    |
| Ratio of 18:2 linoleic acid to total fatty acids (%)        | 0.197                                    | (-0.173, 0.567)  | 0.297  | 0.379                    | 3.233                    |
| Ratio of omega3 fatty acids to total fatty acids (%)        | -0.145                                   | (-0.213, -0.078) | <0.001 | 0.000                    | 0.593                    |
| Ratio of omega6 fatty acids to total fatty acids (%)        | -0.302                                   | (-0.658, 0.054)  | 0.096  | 0.142                    | 3.109                    |
| Ratio of polyunsat. fatty acids to total fatty acids (%)    | -0.447                                   | (-0.830, -0.065) | 0.022  | 0.042                    | 3.346                    |
| Ratio of monounsat. fatty acids to total fatty acids (%)    | 0.499                                    | (0.202, 0.796)   | 0.001  | 0.003                    | 2.606                    |
| Ratio of saturated fatty acids to total fatty acids (%)     | -0.051                                   | (-0.251, 0.148)  | 0.614  | 0.689                    | 1.743                    |
| <b>Glycolysis related</b>                                   |                                          |                  |        |                          |                          |
| Glucose (mmol/L)*                                           | -0.013                                   | (-0.026, 0.001)  | 0.061  | 0.098                    | 0.118                    |
| Lactate (mmol/L)                                            | -0.045                                   | (-0.097, 0.007)  | 0.088  | 0.133                    | 0.456                    |
| Pyruvate (mmol/L)                                           | -0.001                                   | (-0.004, 0.002)  | 0.524  | 0.606                    | 0.024                    |
| Citrate (mmol/L)                                            | 0.007                                    | (0.005, 0.009)   | <0.001 | <0.001                   | 0.018                    |
| Glycerol (mmol/L)                                           | 0.006                                    | (0.002, 0.010)   | 0.004  | 0.009                    | 0.023                    |
| <b>Amino acids</b>                                          |                                          |                  |        |                          |                          |
| Alanine (mmol/L)                                            | 0.011                                    | (0.004, 0.017)   | 0.002  | 0.004                    | 0.058                    |
| Glutamine (mmol/L)                                          | 0.023                                    | (0.018, 0.029)   | <0.001 | <0.001                   | 0.051                    |
| Glycine (mmol/L)                                            | 0.010                                    | (0.006, 0.014)   | <0.001 | <0.001                   | 0.032                    |
| Histidine (mmol/L)                                          | 0.001                                    | (-0.000, 0.002)  | 0.075  | 0.118                    | 0.008                    |
| Isoleucine (mmol/L)                                         | 0.000                                    | (-0.003, 0.002)  | 0.637  | 0.693                    | 0.018                    |

|    |                                                           |        |                  |       |       |       |
|----|-----------------------------------------------------------|--------|------------------|-------|-------|-------|
| 1  | Leucine (mmol/L)                                          | -0.002 | (-0.005, -0.000) | 0.022 | 0.041 | 0.018 |
| 2  | Valine (mmol/L)                                           | -0.007 | (-0.011, -0.003) | 0.001 | 0.003 | 0.036 |
| 3  | Phenylalanine (mmol/L)                                    | -0.002 | (-0.003, -0.001) | 0.003 | 0.007 | 0.009 |
| 4  | Tyrosine (mmol/L)                                         | 0.000  | (-0.001, 0.002)  | 0.582 | 0.663 | 0.014 |
| 5  | <b>Ketone bodies</b>                                      |        |                  |       |       |       |
| 6  | Acetate (mmol/L)*                                         | -0.030 | (-0.048, -0.011) | 0.002 | 0.005 | 0.166 |
| 7  | Acetoacetate (mmol/L)*                                    | -0.058 | (-0.172, 0.055)  | 0.313 | 0.393 | 0.992 |
| 8  | 3hydroxybutyrate (mmol/L)*                                | 0.041  | (-0.019, 0.101)  | 0.178 | 0.248 | 0.513 |
| 9  | <b>Fluid balance</b>                                      |        |                  |       |       |       |
| 10 | Albumin (signal area)                                     | -0.001 | (-0.001, -0.000) | 0.037 | 0.064 | 0.005 |
| 11 | Creatinine (mmol/L)                                       | 0.000  | (-0.001, 0.001)  | 0.624 | 0.690 | 0.007 |
| 12 | <b>Inflammation</b>                                       |        |                  |       |       |       |
| 13 | Glycoprotein acetyls, mainly a1acid glycoprotein (mmol/L) | 0.017  | (-0.004, 0.038)  | 0.104 | 0.151 | 0.183 |

\* Metabolite has been log transformed

^ Benjamini-Hochberg adjusted p-value

# Associations for children in Figure 3 are presented in SD-units. The conversion factor provided (unweighted standard deviation of each metabolite measure in children) can be used to convert the association in absolute concentration to SD units by dividing by the conversion factor.

Where metabolite has been log transformed conversion factor is standard deviation of log transformed metabolite

Supplementary table 4: Differences in mean metabolite levels in female compared to male adults in absolute concentration units.

| Metabolic subgroup                                          | Differences for adults (Female - Male) |                  |        |              |                          |
|-------------------------------------------------------------|----------------------------------------|------------------|--------|--------------|--------------------------|
|                                                             | Estimate                               | 95% CI           | pvalue | Adj_p-value^ | Conversion factor (SD) # |
| <b>Lipoprotein subclass lipids</b>                          |                                        |                  |        |              |                          |
| Total lipids in chylomicrons & ex.large VLDL (mmol/L)*      | -0.930                                 | (-1.271, -0.589) | <0.001 | <0.001       | 2.173                    |
| Total lipids in very large VLDL (mmol/L)*                   | -1.217                                 | (-1.617, -0.818) | <0.001 | <0.001       | 2.555                    |
| Total lipids in large VLDL (mmol/L)*                        | -0.900                                 | (-1.107, -0.693) | <0.001 | <0.001       | 1.343                    |
| Total lipids in medium VLDL (mmol/L)                        | -0.325                                 | (-0.385, -0.264) | <0.001 | <0.001       | 0.398                    |
| Total lipids in small VLDL (mmol/L)                         | -0.167                                 | (-0.201, -0.133) | <0.001 | <0.001       | 0.223                    |
| Total lipids in very small VLDL (mmol/L)                    | -0.022                                 | (-0.039, -0.005) | 0.013  | 0.018        | 0.107                    |
| Total lipids in IDL (mmol/L)                                | 0.014                                  | (-0.023, 0.051)  | 0.465  | 0.530        | 0.236                    |
| Total lipids in large LDL (mmol/L)                          | -0.011                                 | (-0.058, 0.035)  | 0.634  | 0.671        | 0.293                    |
| Total lipids in medium LDL (mmol/L)                         | -0.028                                 | (-0.057, 0.001)  | 0.058  | 0.076        | 0.182                    |
| Total lipids in small LDL (mmol/L)                          | -0.017                                 | (-0.035, 0.001)  | 0.061  | 0.079        | 0.113                    |
| Total lipids in very large HDL (mmol/L)                     | 0.195                                  | (0.158, 0.231)   | <0.001 | <0.001       | 0.239                    |
| Total lipids in large HDL (mmol/L)                          | 0.395                                  | (0.334, 0.455)   | <0.001 | <0.001       | 0.405                    |
| Total lipids in medium HDL (mmol/L)                         | 0.129                                  | (0.101, 0.158)   | <0.001 | <0.001       | 0.184                    |
| Total lipids in small HDL (mmol/L)                          | 0.002                                  | (-0.021, 0.025)  | 0.850  | 0.874        | 0.145                    |
| <b>Lipoprotein particle size</b>                            |                                        |                  |        |              |                          |
| Mean diameter for VLDL particles (nm)                       | -1.414                                 | (-1.669, -1.159) | <0.001 | <0.001       | 1.678                    |
| Mean diameter for LDL particles (nm)                        | 0.081                                  | (0.066, 0.096)   | <0.001 | <0.001       | 0.100                    |
| Mean diameter for HDL particles (nm)                        | 0.278                                  | (0.236, 0.320)   | <0.001 | <0.001       | 0.279                    |
| <b>Cholesterol</b>                                          |                                        |                  |        |              |                          |
| Serum total cholesterol (mmol/L)                            | 0.112                                  | (-0.018, 0.241)  | 0.091  | 0.116        | 0.817                    |
| Total cholesterol in VLDL (mmol/L)                          | -0.187                                 | (-0.230, -0.145) | <0.001 | <0.001       | 0.275                    |
| Remnant cholesterol (nonHDL, nonLDL cholesterol) (mmol/L)   | -0.184                                 | (-0.244, -0.124) | <0.001 | <0.001       | 0.383                    |
| Total cholesterol in LDL (mmol/L)                           | -0.048                                 | (-0.117, 0.021)  | 0.175  | 0.213        | 0.437                    |
| Total cholesterol in HDL (mmol/L)                           | 0.344                                  | (0.286, 0.401)   | <0.001 | <0.001       | 0.382                    |
| Total cholesterol in HDL2 (mmol/L)                          | 0.324                                  | (0.271, 0.378)   | <0.001 | <0.001       | 0.354                    |
| Total cholesterol in HDL3 (mmol/L)                          | 0.019                                  | (0.014, 0.025)   | <0.001 | <0.001       | 0.034                    |
| Esterified cholesterol (mmol/L)                             | 0.070                                  | (-0.023, 0.163)  | 0.139  | 0.172        | 0.586                    |
| Free cholesterol (mmol/L)                                   | 0.046                                  | (0.009, 0.084)   | 0.016  | 0.023        | 0.238                    |
| <b>Glycerides and phospholipids</b>                         |                                        |                  |        |              |                          |
| Serum total triglycerides (mmol/L)*                         | -0.344                                 | (-0.416, -0.273) | <0.001 | <0.001       | 0.468                    |
| Triglycerides in VLDL (mmol/L)*                             | -0.530                                 | (-0.630, -0.429) | <0.001 | <0.001       | 0.659                    |
| Triglycerides in LDL (mmol/L)                               | 0.008                                  | (0.001, 0.014)   | 0.033  | 0.044        | 0.044                    |
| Triglycerides in HDL (mmol/L)                               | -0.004                                 | (-0.010, 0.002)  | 0.228  | 0.272        | 0.040                    |
| Total phosphoglycerides (mmol/L)                            | 0.106                                  | (0.052, 0.159)   | <0.001 | <0.001       | 0.340                    |
| Ratio of triglycerides to phosphoglycerides                 | -0.289                                 | (-0.337, -0.241) | <0.001 | <0.001       | 0.318                    |
| Phosphatidylcholine & other cholines (mmol/L)               | 0.138                                  | (0.086, 0.190)   | <0.001 | <0.001       | 0.331                    |
| Sphingomyelins (mmol/L)                                     | 0.032                                  | (0.020, 0.045)   | <0.001 | <0.001       | 0.078                    |
| Total cholines (mmol/L)                                     | 0.170                                  | (0.115, 0.224)   | <0.001 | <0.001       | 0.349                    |
| <b>Apolipoproteins</b>                                      |                                        |                  |        |              |                          |
| Apolipoprotein A1 (g/L)                                     | 0.146                                  | (0.114, 0.178)   | <0.001 | <0.001       | 0.209                    |
| Apolipoprotein B (g/L)                                      | -0.115                                 | (-0.146, -0.084) | <0.001 | <0.001       | 0.198                    |
| Ratio of apolipoprotein B to apolipoprotein A1              | -0.126                                 | (-0.148, -0.105) | <0.001 | <0.001       | 0.144                    |
| <b>Fatty acids</b>                                          |                                        |                  |        |              |                          |
| Total fatty acids (mmol/L)                                  | -0.711                                 | (-1.091, -0.330) | <0.001 | <0.001       | 2.388                    |
| Estimated degree of unsaturation                            | 0.031                                  | (0.021, 0.042)   | <0.001 | <0.001       | 0.066                    |
| 22:6, docosahexaenoic acid (mmol/L)                         | -0.002                                 | (-0.008, 0.005)  | 0.622  | 0.667        | 0.041                    |
| 18:2, linoleic acid (mmol/L)                                | 0.004                                  | (-0.087, 0.094)  | 0.934  | 0.947        | 0.566                    |
| Omega3 fatty acids (mmol/L)                                 | -0.035                                 | (-0.054, -0.016) | <0.001 | 0.001        | 0.122                    |
| Omega6 fatty acids (mmol/L)                                 | 0.004                                  | (-0.094, 0.102)  | 0.936  | 0.936        | 0.612                    |
| Polyunsat. fatty acids (mmol/L)                             | -0.031                                 | (-0.144, 0.082)  | 0.592  | 0.644        | 0.708                    |
| Monounsatur. fatty acids; 16:1, 18:1 (mmol/L)               | -0.372                                 | (-0.520, -0.225) | <0.001 | <0.001       | 0.930                    |
| Saturated fatty acids (mmol/L)                              | -0.307                                 | (-0.455, -0.159) | <0.001 | <0.001       | 0.932                    |
| <b>Fatty acid ratios</b>                                    |                                        |                  |        |              |                          |
| Ratio of 22:6 docosahexaenoic acid to total fatty acids (%) | 0.064                                  | (0.018, 0.110)   | 0.006  | 0.009        | 0.288                    |
| Ratio of 18:2 linoleic acid to total fatty acids (%)        | 1.527                                  | (0.984, 2.070)   | <0.001 | <0.001       | 3.430                    |
| Ratio of omega3 fatty acids to total fatty acids (%)        | -0.038                                 | (-0.152, 0.075)  | 0.508  | 0.570        | 0.710                    |
| Ratio of omega6 fatty acids to total fatty acids (%)        | 1.882                                  | (1.351, 2.412)   | <0.001 | <0.001       | 3.376                    |
| Ratio of polyunsatur. fatty acids to total fatty acids (%)  | 1.843                                  | (1.272, 2.414)   | <0.001 | <0.001       | 3.621                    |
| Ratio of monounsatur. fatty acids to total fatty acids (%)  | -1.456                                 | (-1.914, -0.998) | <0.001 | <0.001       | 2.904                    |
| Ratio of saturated fatty acids to total fatty acids (%)     | -0.387                                 | (-0.700, -0.074) | 0.015  | 0.022        | 1.959                    |
| <b>Glycolysis related</b>                                   |                                        |                  |        |              |                          |
| Glucose (mmol/L)*                                           | -0.071                                 | (-0.097, -0.044) | <0.001 | <0.001       | 0.168                    |
| Lactate (mmol/L)                                            | -0.178                                 | (-0.252, -0.105) | <0.001 | <0.001       | 0.469                    |
| Pyruvate (mmol/L)                                           | -0.007                                 | (-0.013, -0.002) | 0.004  | 0.006        | 0.032                    |



|    |                                                           |        |                  |        |        |       |
|----|-----------------------------------------------------------|--------|------------------|--------|--------|-------|
| 1  | Citrate (mmol/L)                                          | -0.001 | (-0.004, 0.001)  | 0.335  | 0.387  | 0.016 |
| 2  | Glycerol (mmol/L)                                         | -0.003 | (-0.008, 0.002)  | 0.279  | 0.328  | 0.022 |
| 3  |                                                           |        |                  |        |        |       |
| 4  | <b>Amino acids</b>                                        |        |                  |        |        |       |
| 5  | Alanine (mmol/L)                                          | -0.020 | (-0.030, -0.011) | <0.001 | <0.001 | 0.060 |
| 6  | Glutamine (mmol/L)                                        | -0.038 | (-0.048, -0.028) | <0.001 | <0.001 | 0.065 |
| 7  | Glycine (mmol/L)                                          | 0.029  | (0.020, 0.038)   | <0.001 | <0.001 | 0.059 |
| 8  | Histidine (mmol/L)                                        | -0.001 | (-0.003, 0.000)  | 0.116  | 0.146  | 0.009 |
| 9  | Isoleucine (mmol/L)                                       | -0.016 | (-0.019, -0.013) | <0.001 | <0.001 | 0.021 |
| 10 | Leucine (mmol/L)                                          | -0.019 | (-0.022, -0.016) | <0.001 | <0.001 | 0.022 |
| 11 | Valine (mmol/L)                                           | -0.029 | (-0.035, -0.022) | <0.001 | <0.001 | 0.042 |
| 12 | Phenylalanine (mmol/L)                                    | 0.000  | (-0.002, 0.001)  | 0.576  | 0.637  | 0.010 |
| 13 | Tyrosine (mmol/L)                                         | -0.005 | (-0.007, -0.003) | <0.001 | <0.001 | 0.014 |
| 14 |                                                           |        |                  |        |        |       |
| 15 | <b>Ketone bodies</b>                                      |        |                  |        |        |       |
| 16 | Acetate (mmol/L)*                                         | -0.076 | (-0.119, -0.033) | 0.001  | 0.001  | 0.273 |
| 17 | Acetoacetate (mmol/L)*                                    | 0.018  | (-0.148, 0.184)  | 0.828  | 0.863  | 1.048 |
| 18 | 3hydroxybutyrate (mmol/L)*                                | -0.087 | (-0.163, -0.011) | 0.025  | 0.035  | 0.472 |
| 19 |                                                           |        |                  |        |        |       |
| 20 | <b>Fluid balance</b>                                      |        |                  |        |        |       |
| 21 | Albumin (signal area)                                     | -0.002 | (-0.002, -0.001) | <0.001 | <0.001 | 0.005 |
| 22 | Creatinine (mmol/L)                                       | -0.013 | (-0.015, -0.012) | <0.001 | <0.001 | 0.010 |
| 23 |                                                           |        |                  |        |        |       |
| 24 | <b>Inflammation</b>                                       |        |                  |        |        |       |
| 25 | Glycoprotein acetyls, mainly a1acid glycoprotein (mmol/L) | -0.098 | (-0.136, -0.061) | <0.001 | <0.001 | 0.239 |

\* Metabolite has been log transformed

^ Benjamini-Hochberg adjusted p-value

# Associations for parents in Figure 3 are presented in SD-units. The conversion factor provided (unweighted standard deviation of each metabolite measure in adults/parents) can be used to convert the association in absolute concentration to SD units by dividing by the conversion factor.

Where metabolite has been log transformed conversion factor is standard deviation of log transformed metabolite

Supplementary table 5: Mother-child concordance; correlations and partial correlations between mothers and their sons, daughters and all children.

| Metabolic subgroup                                          | Mother |      |           |     |      |           |       |      |           |     |      |           |              |      |           |     |      |           |
|-------------------------------------------------------------|--------|------|-----------|-----|------|-----------|-------|------|-----------|-----|------|-----------|--------------|------|-----------|-----|------|-----------|
|                                                             | Boys   |      |           |     |      |           | Girls |      |           |     |      |           | All Children |      |           |     |      |           |
|                                                             | n      | CC   | 95% CI    | n   | PCC* | 95% CI    | n     | CC   | 95% CI    | n   | PCC* | 95% CI    | n            | CC   | 95% CI    | n   | PCC* | 95% CI    |
| <b>Lipoprotein subclass lipids</b>                          |        |      |           |     |      |           |       |      |           |     |      |           |              |      |           |     |      |           |
| Total lipids in chylomicrons & ex.Large VLDL (mmol/L)*      | 469    | 0.22 | 0.13-0.30 | 433 | 0.23 | 0.14-0.31 | 518   | 0.24 | 0.16-0.32 | 476 | 0.21 | 0.12-0.29 | 987          | 0.23 | 0.17-0.29 | 909 | 0.22 | 0.16-0.28 |
| Total lipids in very large VLDL (mmol/L)*                   | 469    | 0.25 | 0.16-0.33 | 433 | 0.25 | 0.16-0.34 | 518   | 0.22 | 0.14-0.30 | 476 | 0.20 | 0.12-0.29 | 987          | 0.24 | 0.18-0.29 | 909 | 0.23 | 0.17-0.29 |
| Total lipids in large VLDL (mmol/L)*                        | 469    | 0.22 | 0.13-0.30 | 433 | 0.24 | 0.15-0.33 | 518   | 0.23 | 0.14-0.31 | 476 | 0.22 | 0.14-0.31 | 987          | 0.22 | 0.16-0.28 | 909 | 0.23 | 0.17-0.29 |
| Total lipids in medium VLDL (mmol/L)                        | 469    | 0.26 | 0.17-0.34 | 433 | 0.28 | 0.19-0.36 | 518   | 0.29 | 0.21-0.37 | 476 | 0.30 | 0.21-0.38 | 987          | 0.28 | 0.22-0.34 | 909 | 0.29 | 0.23-0.35 |
| Total lipids in small VLDL (mmol/L)                         | 469    | 0.26 | 0.18-0.35 | 433 | 0.28 | 0.19-0.36 | 518   | 0.30 | 0.21-0.37 | 476 | 0.30 | 0.21-0.38 | 987          | 0.29 | 0.23-0.34 | 909 | 0.29 | 0.23-0.35 |
| Total lipids in very small VLDL (mmol/L)                    | 469    | 0.22 | 0.14-0.31 | 433 | 0.21 | 0.12-0.30 | 518   | 0.26 | 0.17-0.34 | 476 | 0.26 | 0.18-0.35 | 987          | 0.25 | 0.19-0.30 | 909 | 0.25 | 0.18-0.31 |
| Total lipids in IDL (mmol/L)                                | 469    | 0.27 | 0.18-0.35 | 433 | 0.23 | 0.14-0.32 | 518   | 0.29 | 0.21-0.37 | 476 | 0.31 | 0.23-0.39 | 987          | 0.29 | 0.23-0.34 | 909 | 0.28 | 0.22-0.34 |
| Total lipids in large LDL (mmol/L)                          | 469    | 0.28 | 0.19-0.36 | 433 | 0.24 | 0.15-0.33 | 518   | 0.30 | 0.22-0.37 | 476 | 0.32 | 0.24-0.40 | 987          | 0.29 | 0.23-0.35 | 909 | 0.29 | 0.23-0.35 |
| Total lipids in medium LDL (mmol/L)                         | 469    | 0.28 | 0.20-0.36 | 433 | 0.24 | 0.15-0.33 | 518   | 0.29 | 0.21-0.37 | 476 | 0.32 | 0.24-0.40 | 987          | 0.29 | 0.23-0.35 | 909 | 0.29 | 0.23-0.35 |
| Total lipids in small LDL (mmol/L)                          | 469    | 0.28 | 0.19-0.36 | 433 | 0.24 | 0.15-0.32 | 518   | 0.29 | 0.21-0.37 | 476 | 0.32 | 0.23-0.40 | 987          | 0.28 | 0.23-0.34 | 909 | 0.28 | 0.22-0.34 |
| Total lipids in very large HDL (mmol/L)                     | 469    | 0.30 | 0.22-0.38 | 433 | 0.30 | 0.21-0.39 | 518   | 0.32 | 0.24-0.39 | 476 | 0.30 | 0.21-0.38 | 987          | 0.31 | 0.25-0.36 | 909 | 0.30 | 0.24-0.36 |
| Total lipids in large HDL (mmol/L)                          | 469    | 0.31 | 0.23-0.39 | 433 | 0.31 | 0.23-0.40 | 518   | 0.28 | 0.20-0.36 | 476 | 0.26 | 0.18-0.34 | 987          | 0.30 | 0.24-0.35 | 909 | 0.29 | 0.23-0.35 |
| Total lipids in medium HDL (mmol/L)                         | 469    | 0.22 | 0.13-0.30 | 433 | 0.20 | 0.11-0.29 | 518   | 0.12 | 0.03-0.20 | 476 | 0.13 | 0.04-0.22 | 987          | 0.17 | 0.11-0.23 | 909 | 0.17 | 0.10-0.23 |
| Total lipids in small HDL (mmol/L)                          | 469    | 0.23 | 0.14-0.31 | 433 | 0.22 | 0.13-0.31 | 518   | 0.20 | 0.12-0.29 | 476 | 0.20 | 0.11-0.28 | 987          | 0.21 | 0.15-0.27 | 909 | 0.21 | 0.15-0.27 |
| <b>Lipoprotein particle size</b>                            |        |      |           |     |      |           |       |      |           |     |      |           |              |      |           |     |      |           |
| Mean diameter for VLDL particles (nm)                       | 469    | 0.30 | 0.22-0.38 | 433 | 0.32 | 0.23-0.40 | 518   | 0.27 | 0.19-0.35 | 476 | 0.25 | 0.16-0.33 | 987          | 0.29 | 0.23-0.35 | 909 | 0.28 | 0.22-0.34 |
| Mean diameter for LDL particles (nm)                        | 469    | 0.22 | 0.13-0.31 | 433 | 0.20 | 0.11-0.29 | 518   | 0.30 | 0.22-0.38 | 476 | 0.32 | 0.24-0.40 | 987          | 0.26 | 0.20-0.31 | 909 | 0.26 | 0.20-0.32 |
| Mean diameter for HDL particles (nm)                        | 469    | 0.32 | 0.23-0.40 | 433 | 0.32 | 0.23-0.40 | 518   | 0.33 | 0.26-0.41 | 476 | 0.31 | 0.23-0.39 | 987          | 0.33 | 0.27-0.38 | 909 | 0.31 | 0.25-0.37 |
| <b>Cholesterol</b>                                          |        |      |           |     |      |           |       |      |           |     |      |           |              |      |           |     |      |           |
| Serum total cholesterol (mmol/L)                            | 469    | 0.27 | 0.19-0.35 | 433 | 0.23 | 0.14-0.32 | 518   | 0.32 | 0.24-0.39 | 476 | 0.34 | 0.26-0.42 | 987          | 0.30 | 0.24-0.35 | 909 | 0.30 | 0.24-0.35 |
| Total cholesterol in VLDL (mmol/L)                          | 469    | 0.25 | 0.17-0.34 | 433 | 0.27 | 0.18-0.36 | 518   | 0.29 | 0.21-0.36 | 476 | 0.29 | 0.21-0.37 | 987          | 0.28 | 0.22-0.33 | 909 | 0.29 | 0.23-0.35 |
| Remnant cholesterol (nonHDL, nonLDL cholesterol) (mmol/L)   | 469    | 0.25 | 0.17-0.34 | 433 | 0.26 | 0.17-0.34 | 518   | 0.29 | 0.21-0.37 | 476 | 0.31 | 0.22-0.39 | 987          | 0.28 | 0.22-0.34 | 909 | 0.29 | 0.23-0.35 |
| Total cholesterol in LDL (mmol/L)                           | 469    | 0.28 | 0.20-0.36 | 433 | 0.24 | 0.15-0.33 | 518   | 0.29 | 0.21-0.37 | 476 | 0.32 | 0.23-0.40 | 987          | 0.29 | 0.23-0.34 | 909 | 0.29 | 0.23-0.35 |
| Total cholesterol in HDL (mmol/L)                           | 469    | 0.30 | 0.22-0.38 | 433 | 0.30 | 0.21-0.39 | 518   | 0.32 | 0.24-0.39 | 476 | 0.34 | 0.26-0.42 | 987          | 0.30 | 0.24-0.35 | 909 | 0.27 | 0.21-0.33 |
| Total cholesterol in very large HDL (mmol/L)                | 469    | 0.30 | 0.22-0.38 | 433 | 0.31 | 0.22-0.39 | 518   | 0.32 | 0.24-0.40 | 476 | 0.33 | 0.25-0.41 | 987          | 0.28 | 0.22-0.33 | 909 | 0.27 | 0.21-0.33 |
| Total cholesterol in large HDL (mmol/L)                     | 469    | 0.25 | 0.16-0.33 | 433 | 0.23 | 0.14-0.32 | 518   | 0.25 | 0.16-0.33 | 476 | 0.24 | 0.16-0.33 | 987          | 0.25 | 0.19-0.31 | 909 | 0.24 | 0.17-0.30 |
| Esterified cholesterol (mmol/L)                             | 465    | 0.28 | 0.19-0.36 | 430 | 0.23 | 0.14-0.32 | 518   | 0.32 | 0.24-0.39 | 476 | 0.34 | 0.26-0.42 | 983          | 0.30 | 0.24-0.35 | 906 | 0.29 | 0.23-0.35 |
| Free cholesterol (mmol/L)                                   | 465    | 0.26 | 0.18-0.34 | 430 | 0.22 | 0.13-0.31 | 518   | 0.32 | 0.24-0.40 | 476 | 0.35 | 0.27-0.43 | 983          | 0.30 | 0.24-0.35 | 906 | 0.30 | 0.24-0.35 |
| <b>Glycerides and phospholipids</b>                         |        |      |           |     |      |           |       |      |           |     |      |           |              |      |           |     |      |           |
| Serum total triglycerides (mmol/L)*                         | 469    | 0.28 | 0.20-0.36 | 433 | 0.30 | 0.21-0.38 | 518   | 0.29 | 0.21-0.37 | 476 | 0.29 | 0.20-0.37 | 987          | 0.29 | 0.23-0.35 | 909 | 0.30 | 0.24-0.36 |
| Triglycerides in VLDL (mmol/L)*                             | 469    | 0.30 | 0.22-0.38 | 433 | 0.31 | 0.23-0.40 | 518   | 0.28 | 0.20-0.36 | 476 | 0.27 | 0.18-0.35 | 987          | 0.29 | 0.23-0.35 | 909 | 0.29 | 0.23-0.35 |
| Triglycerides in LDL (mmol/L)                               | 469    | 0.19 | 0.10-0.28 | 433 | 0.18 | 0.09-0.27 | 518   | 0.26 | 0.18-0.34 | 476 | 0.27 | 0.18-0.35 | 987          | 0.23 | 0.17-0.29 | 909 | 0.23 | 0.17-0.29 |
| Triglycerides in HDL (mmol/L)                               | 469    | 0.21 | 0.12-0.30 | 433 | 0.23 | 0.14-0.32 | 518   | 0.26 | 0.18-0.34 | 476 | 0.26 | 0.18-0.34 | 987          | 0.24 | 0.18-0.30 | 909 | 0.25 | 0.19-0.31 |
| Total phosphoglycerides (mmol/L)                            | 465    | 0.26 | 0.17-0.34 | 430 | 0.23 | 0.14-0.32 | 518   | 0.26 | 0.17-0.34 | 476 | 0.27 | 0.18-0.35 | 983          | 0.26 | 0.20-0.32 | 906 | 0.25 | 0.18-0.31 |
| Ratio of triglycerides to phosphoglycerides                 | 465    | 0.23 | 0.15-0.32 | 430 | 0.26 | 0.16-0.34 | 518   | 0.26 | 0.18-0.34 | 476 | 0.27 | 0.19-0.35 | 983          | 0.25 | 0.20-0.31 | 906 | 0.27 | 0.20-0.33 |
| Phosphatidylcholine & other cholinols (mmol/L)              | 465    | 0.27 | 0.18-0.35 | 430 | 0.24 | 0.14-0.32 | 518   | 0.25 | 0.17-0.33 | 476 | 0.27 | 0.18-0.35 | 983          | 0.26 | 0.20-0.32 | 906 | 0.25 | 0.19-0.31 |
| Sphingomyelins (mmol/L)                                     | 465    | 0.23 | 0.15-0.32 | 430 | 0.22 | 0.12-0.30 | 518   | 0.29 | 0.21-0.37 | 476 | 0.31 | 0.23-0.39 | 983          | 0.27 | 0.21-0.32 | 906 | 0.27 | 0.21-0.33 |
| Total cholinols (mmol/L)                                    | 465    | 0.27 | 0.18-0.35 | 430 | 0.23 | 0.14-0.32 | 518   | 0.28 | 0.20-0.35 | 476 | 0.28 | 0.20-0.37 | 983          | 0.27 | 0.21-0.33 | 906 | 0.26 | 0.20-0.32 |
| <b>Apolipoproteins</b>                                      |        |      |           |     |      |           |       |      |           |     |      |           |              |      |           |     |      |           |
| Apolipoprotein A1 (g/L)                                     | 469    | 0.28 | 0.20-0.36 | 433 | 0.26 | 0.17-0.35 | 518   | 0.26 | 0.18-0.34 | 476 | 0.26 | 0.17-0.34 | 987          | 0.27 | 0.21-0.33 | 909 | 0.26 | 0.20-0.32 |
| Apolipoprotein B (g/L)                                      | 469    | 0.26 | 0.18-0.35 | 433 | 0.27 | 0.18-0.35 | 517   | 0.30 | 0.22-0.38 | 475 | 0.32 | 0.24-0.40 | 986          | 0.29 | 0.23-0.35 | 908 | 0.31 | 0.25-0.36 |
| Ratio of apolipoprotein B to apolipoprotein A1              | 469    | 0.28 | 0.20-0.36 | 433 | 0.30 | 0.21-0.38 | 517   | 0.25 | 0.17-0.33 | 475 | 0.25 | 0.16-0.33 | 986          | 0.27 | 0.21-0.33 | 908 | 0.28 | 0.22-0.34 |
| <b>Fatty acids</b>                                          |        |      |           |     |      |           |       |      |           |     |      |           |              |      |           |     |      |           |
| Total fatty acids (mmol/L)                                  | 462    | 0.22 | 0.13-0.30 | 427 | 0.22 | 0.13-0.31 | 517   | 0.31 | 0.23-0.39 | 475 | 0.33 | 0.25-0.41 | 979          | 0.27 | 0.22-0.33 | 902 | 0.29 | 0.22-0.34 |
| Estimated degree of unsaturation                            | 462    | 0.30 | 0.22-0.38 | 427 | 0.32 | 0.23-0.41 | 517   | 0.27 | 0.19-0.35 | 475 | 0.24 | 0.16-0.33 | 979          | 0.29 | 0.23-0.34 | 902 | 0.28 | 0.22-0.34 |
| 22:6, docosahexaenoic acid (mmol/L)                         | 462    | 0.20 | 0.11-0.29 | 427 | 0.18 | 0.09-0.27 | 517   | 0.34 | 0.26-0.41 | 475 | 0.32 | 0.24-0.40 | 979          | 0.27 | 0.21-0.32 | 902 | 0.25 | 0.19-0.31 |
| 18:2, linoleic acid (mmol/L)                                | 462    | 0.22 | 0.13-0.31 | 427 | 0.22 | 0.13-0.31 | 517   | 0.27 | 0.19-0.35 | 475 | 0.30 | 0.21-0.38 | 979          | 0.25 | 0.19-0.31 | 902 | 0.27 | 0.21-0.33 |
| Omega3 fatty acids (mmol/L)                                 | 462    | 0.20 | 0.11-0.29 | 427 | 0.19 | 0.09-0.28 | 517   | 0.34 | 0.27-0.42 | 475 | 0.34 | 0.26-0.42 | 979          | 0.27 | 0.21-0.33 | 902 | 0.26 | 0.20-0.32 |
| Omega6 fatty acids (mmol/L)                                 | 462    | 0.23 | 0.14-0.32 | 427 | 0.22 | 0.13-0.31 | 517   | 0.31 | 0.23-0.38 | 475 | 0.33 | 0.25-0.41 | 979          | 0.27 | 0.21-0.33 | 902 | 0.28 | 0.22-0.34 |
| Polysat. fatty acids (mmol/L)                               | 462    | 0.23 | 0.14-0.31 | 427 | 0.22 | 0.12-0.30 | 517   | 0.32 | 0.24-0.39 | 475 | 0.34 | 0.26-0.42 | 979          | 0.28 | 0.22-0.33 | 902 | 0.28 | 0.22-0.34 |
| Monounsat. fatty acids: 16:1, 18:1 (mmol/L)                 | 462    | 0.24 | 0.15-0.33 | 427 | 0.25 | 0.16-0.34 | 517   | 0.33 | 0.25-0.40 | 475 | 0.33 | 0.25-0.41 | 979          | 0.29 | 0.24-0.35 | 902 | 0.30 | 0.24-0.36 |
| Saturated fatty acids (mmol/L)                              | 462    | 0.21 | 0.12-0.29 | 427 | 0.21 | 0.12-0.30 | 517   | 0.29 | 0.21-0.37 | 475 | 0.30 | 0.21-0.38 | 979          | 0.26 | 0.20-0.32 | 902 | 0.26 | 0.20-0.32 |
| <b>Fatty acid ratios</b>                                    |        |      |           |     |      |           |       |      |           |     |      |           |              |      |           |     |      |           |
| Ratio of 22:6:docosahexaenoic acid to total fatty acids (%) | 462    | 0.31 | 0.22-0.39 | 427 | 0.29 | 0.20-0.38 | 517   | 0.35 | 0.27-0.42 | 475 | 0.32 | 0.24-0.40 | 979          | 0.33 | 0.27-0.39 | 902 | 0.31 | 0.25-0.36 |
| Ratio of 18:2 linoleic acid to total fatty acids (%)        | 462    | 0.13 | 0.04-0.22 | 427 | 0.15 | 0.06-0.24 | 517   | 0.20 | 0.11-0.28 | 475 | 0.16 | 0.08-0.25 | 979          | 0.17 | 0.11-0.23 | 902 | 0.16 | 0.09-0.22 |
| Ratio of omega3 fatty acids to total fatty acids (%)        | 462    | 0.32 | 0.24-0.40 | 427 | 0.32 | 0.23-0.40 | 517   | 0.40 | 0.33-0.47 | 475 | 0.37 | 0.29-0.44 | 979          | 0.36 | 0.31-0.41 | 902 | 0.34 | 0.28-0.39 |
| Ratio of omega6 fatty acids to total fatty acids (%)        | 462    | 0.23 | 0.15-0.32 | 427 | 0.26 | 0.17-0.35 | 517   | 0.25 | 0.17-0.33 | 475 | 0.22 | 0.13-0.30 | 979          | 0.24 | 0.18-0.30 | 902 | 0.24 | 0.17-0.30 |
| Ratio of polysat. fatty acids to total fatty acids (%)      | 462    | 0.27 | 0.19-0.36 | 427 | 0.30 | 0.21-0.38 | 517   | 0.28 | 0.20-0.36 | 475 | 0.24 | 0.16-0.33 | 979          | 0.28 | 0.22-0.33 | 902 | 0.27 | 0.        |

Supplementary table 6: Parent-child concordance, correlation and partial correlations between all parents and their sons, daughters and all children.

| Metabolic subgroup                                          | All Parents |      |             |     |      |              |     |      |             |     |              |             |      |      |             |      |      |             |
|-------------------------------------------------------------|-------------|------|-------------|-----|------|--------------|-----|------|-------------|-----|--------------|-------------|------|------|-------------|------|------|-------------|
|                                                             | Male Child  |      |             |     |      | Female Child |     |      |             |     | All Children |             |      |      |             |      |      |             |
|                                                             | n           | CC   | 95% CI      | n   | PCC* | 95% CI       | n   | CC   | 95% CI      | n   | PCC*         | 95% CI      | n    | CC   | 95% CI      |      |      |             |
| <b>Lipoprotein subclass lipids</b>                          |             |      |             |     |      |              |     |      |             |     |              |             |      |      |             |      |      |             |
| Total lipids in chylomicrons & ex.large VLDL (mmol/L)*      | 547         | 0.22 | 0.14 - 0.30 | 505 | 0.23 | 0.14 - 0.31  | 586 | 0.20 | 0.12 - 0.28 | 544 | 0.17         | 0.08 - 0.25 | 1133 | 0.22 | 0.16 - 0.27 | 1049 | 0.20 | 0.15 - 0.26 |
| Total lipids in very large VLDL (mmol/L)*                   | 547         | 0.23 | 0.15 - 0.31 | 505 | 0.23 | 0.15 - 0.31  | 586 | 0.17 | 0.10 - 0.25 | 544 | 0.16         | 0.08 - 0.24 | 1133 | 0.21 | 0.15 - 0.26 | 1049 | 0.20 | 0.14 - 0.26 |
| Total lipids in large VLDL (mmol/L)*                        | 547         | 0.20 | 0.12 - 0.28 | 505 | 0.22 | 0.13 - 0.30  | 586 | 0.20 | 0.12 - 0.28 | 544 | 0.19         | 0.11 - 0.27 | 1133 | 0.20 | 0.15 - 0.26 | 1049 | 0.21 | 0.15 - 0.26 |
| Total lipids in medium VLDL (mmol/L)                        | 547         | 0.27 | 0.19 - 0.35 | 505 | 0.28 | 0.20 - 0.36  | 586 | 0.25 | 0.17 - 0.32 | 544 | 0.24         | 0.16 - 0.32 | 1133 | 0.26 | 0.21 - 0.31 | 1049 | 0.26 | 0.20 - 0.32 |
| Total lipids in small VLDL (mmol/L)                         | 547         | 0.27 | 0.19 - 0.34 | 505 | 0.27 | 0.19 - 0.35  | 586 | 0.26 | 0.18 - 0.33 | 544 | 0.26         | 0.17 - 0.33 | 1133 | 0.26 | 0.21 - 0.32 | 1049 | 0.26 | 0.21 - 0.32 |
| Total lipids in very small VLDL (mmol/L)                    | 547         | 0.23 | 0.15 - 0.31 | 505 | 0.22 | 0.13 - 0.30  | 586 | 0.25 | 0.17 - 0.33 | 544 | 0.26         | 0.18 - 0.34 | 1133 | 0.25 | 0.19 - 0.30 | 1049 | 0.24 | 0.19 - 0.30 |
| Total lipids in IDL (mmol/L)                                | 547         | 0.28 | 0.20 - 0.35 | 505 | 0.25 | 0.16 - 0.33  | 586 | 0.29 | 0.21 - 0.36 | 544 | 0.31         | 0.23 - 0.38 | 1133 | 0.29 | 0.23 - 0.34 | 1049 | 0.28 | 0.23 - 0.34 |
| Total lipids in large LDL (mmol/L)                          | 547         | 0.28 | 0.20 - 0.36 | 505 | 0.25 | 0.17 - 0.33  | 586 | 0.29 | 0.21 - 0.36 | 544 | 0.31         | 0.23 - 0.38 | 1133 | 0.29 | 0.23 - 0.34 | 1049 | 0.29 | 0.23 - 0.34 |
| Total lipids in medium LDL (mmol/L)                         | 547         | 0.29 | 0.21 - 0.36 | 505 | 0.25 | 0.17 - 0.33  | 586 | 0.28 | 0.21 - 0.36 | 544 | 0.31         | 0.23 - 0.38 | 1133 | 0.28 | 0.23 - 0.34 | 1049 | 0.29 | 0.23 - 0.34 |
| Total lipids in small LDL (mmol/L)                          | 547         | 0.28 | 0.20 - 0.35 | 505 | 0.24 | 0.16 - 0.32  | 586 | 0.28 | 0.20 - 0.35 | 544 | 0.31         | 0.23 - 0.38 | 1133 | 0.28 | 0.22 - 0.33 | 1049 | 0.28 | 0.22 - 0.33 |
| Total lipids in very large HDL (mmol/L)                     | 547         | 0.29 | 0.21 - 0.37 | 505 | 0.28 | 0.20 - 0.36  | 586 | 0.29 | 0.21 - 0.36 | 544 | 0.27         | 0.19 - 0.35 | 1133 | 0.29 | 0.24 - 0.34 | 1049 | 0.28 | 0.22 - 0.33 |
| Total lipids in large HDL (mmol/L)                          | 547         | 0.29 | 0.21 - 0.36 | 505 | 0.28 | 0.19 - 0.36  | 586 | 0.24 | 0.17 - 0.32 | 544 | 0.22         | 0.14 - 0.30 | 1133 | 0.27 | 0.21 - 0.32 | 1049 | 0.25 | 0.19 - 0.30 |
| Total lipids in medium HDL (mmol/L)                         | 547         | 0.15 | 0.07 - 0.24 | 505 | 0.13 | 0.04 - 0.21  | 586 | 0.10 | 0.02 - 0.18 | 544 | 0.10         | 0.02 - 0.19 | 1133 | 0.12 | 0.07 - 0.18 | 1049 | 0.11 | 0.05 - 0.17 |
| Total lipids in small HDL (mmol/L)                          | 547         | 0.19 | 0.10 - 0.27 | 505 | 0.16 | 0.08 - 0.25  | 586 | 0.18 | 0.10 - 0.26 | 544 | 0.17         | 0.09 - 0.25 | 1133 | 0.18 | 0.12 - 0.23 | 1049 | 0.17 | 0.11 - 0.22 |
| <b>Lipoprotein particle size</b>                            |             |      |             |     |      |              |     |      |             |     |              |             |      |      |             |      |      |             |
| Mean diameter for VLDL particles (nm)                       | 547         | 0.29 | 0.21 - 0.36 | 505 | 0.30 | 0.22 - 0.38  | 586 | 0.22 | 0.14 - 0.29 | 544 | 0.19         | 0.11 - 0.27 | 1133 | 0.25 | 0.20 - 0.31 | 1049 | 0.24 | 0.19 - 0.30 |
| Mean diameter for LDL particles (nm)                        | 547         | 0.19 | 0.11 - 0.27 | 505 | 0.17 | 0.08 - 0.25  | 586 | 0.27 | 0.19 - 0.34 | 544 | 0.29         | 0.21 - 0.36 | 1133 | 0.23 | 0.17 - 0.28 | 1049 | 0.23 | 0.17 - 0.28 |
| Mean diameter for HDL particles (nm)                        | 547         | 0.31 | 0.23 - 0.38 | 505 | 0.30 | 0.22 - 0.38  | 586 | 0.30 | 0.22 - 0.37 | 544 | 0.27         | 0.19 - 0.35 | 1133 | 0.30 | 0.25 - 0.35 | 1049 | 0.29 | 0.23 - 0.34 |
| <b>Cholesterol</b>                                          |             |      |             |     |      |              |     |      |             |     |              |             |      |      |             |      |      |             |
| Serum total cholesterol (mmol/L)                            | 547         | 0.28 | 0.20 - 0.36 | 505 | 0.24 | 0.16 - 0.32  | 586 | 0.31 | 0.24 - 0.38 | 544 | 0.33         | 0.26 - 0.41 | 1133 | 0.30 | 0.24 - 0.35 | 1049 | 0.29 | 0.24 - 0.35 |
| Total cholesterol in VLDL (mmol/L)                          | 547         | 0.26 | 0.18 - 0.34 | 505 | 0.27 | 0.19 - 0.35  | 586 | 0.26 | 0.18 - 0.33 | 544 | 0.26         | 0.18 - 0.34 | 1133 | 0.26 | 0.21 - 0.32 | 1049 | 0.27 | 0.21 - 0.32 |
| Remnant cholesterol (nonHDL, nonLDL cholesterol) (mmol/L)   | 547         | 0.27 | 0.19 - 0.34 | 505 | 0.26 | 0.18 - 0.34  | 586 | 0.28 | 0.20 - 0.35 | 544 | 0.29         | 0.21 - 0.37 | 1133 | 0.27 | 0.22 - 0.33 | 1049 | 0.28 | 0.22 - 0.34 |
| Total cholesterol in LDL (mmol/L)                           | 547         | 0.29 | 0.21 - 0.36 | 505 | 0.26 | 0.17 - 0.34  | 586 | 0.28 | 0.21 - 0.35 | 544 | 0.30         | 0.23 - 0.38 | 1133 | 0.29 | 0.23 - 0.34 | 1049 | 0.28 | 0.23 - 0.34 |
| Total cholesterol in HDL (mmol/L)                           | 547         | 0.27 | 0.19 - 0.35 | 505 | 0.25 | 0.17 - 0.33  | 586 | 0.22 | 0.14 - 0.29 | 544 | 0.20         | 0.12 - 0.28 | 1133 | 0.24 | 0.19 - 0.30 | 1049 | 0.22 | 0.17 - 0.28 |
| Total cholesterol in HDL2 (mmol/L)                          | 547         | 0.27 | 0.19 - 0.34 | 505 | 0.25 | 0.17 - 0.33  | 586 | 0.21 | 0.14 - 0.29 | 544 | 0.20         | 0.11 - 0.28 | 1133 | 0.24 | 0.18 - 0.29 | 1049 | 0.22 | 0.16 - 0.28 |
| Total cholesterol in HDL3 (mmol/L)                          | 547         | 0.25 | 0.17 - 0.33 | 505 | 0.22 | 0.14 - 0.30  | 586 | 0.23 | 0.15 - 0.31 | 544 | 0.23         | 0.14 - 0.30 | 1133 | 0.24 | 0.19 - 0.30 | 1049 | 0.22 | 0.16 - 0.28 |
| Esterified cholesterol (mmol/L)                             | 543         | 0.28 | 0.20 - 0.36 | 502 | 0.24 | 0.15 - 0.32  | 584 | 0.31 | 0.24 - 0.38 | 542 | 0.33         | 0.25 - 0.40 | 1127 | 0.30 | 0.24 - 0.35 | 1044 | 0.29 | 0.23 - 0.34 |
| Free cholesterol (mmol/L)                                   | 543         | 0.27 | 0.19 - 0.34 | 502 | 0.23 | 0.14 - 0.31  | 584 | 0.32 | 0.24 - 0.39 | 542 | 0.34         | 0.26 - 0.41 | 1127 | 0.29 | 0.24 - 0.35 | 1044 | 0.29 | 0.23 - 0.34 |
| <b>Glycerides and phospholipids</b>                         |             |      |             |     |      |              |     |      |             |     |              |             |      |      |             |      |      |             |
| Serum total triglycerides (mmol/L)*                         | 547         | 0.28 | 0.20 - 0.35 | 505 | 0.29 | 0.20 - 0.36  | 586 | 0.25 | 0.17 - 0.32 | 544 | 0.24         | 0.16 - 0.32 | 1133 | 0.26 | 0.21 - 0.32 | 1049 | 0.26 | 0.21 - 0.32 |
| Triglycerides in VLDL (mmol/L)*                             | 547         | 0.28 | 0.20 - 0.36 | 505 | 0.29 | 0.21 - 0.37  | 586 | 0.23 | 0.15 - 0.30 | 544 | 0.21         | 0.13 - 0.29 | 1133 | 0.26 | 0.20 - 0.31 | 1049 | 0.25 | 0.20 - 0.31 |
| Triglycerides in LDL (mmol/L)                               | 547         | 0.20 | 0.12 - 0.28 | 505 | 0.19 | 0.10 - 0.27  | 586 | 0.27 | 0.19 - 0.34 | 544 | 0.28         | 0.20 - 0.35 | 1133 | 0.24 | 0.18 - 0.29 | 1049 | 0.24 | 0.18 - 0.29 |
| Triglycerides in HDL (mmol/L)                               | 547         | 0.25 | 0.17 - 0.33 | 505 | 0.26 | 0.18 - 0.34  | 586 | 0.27 | 0.20 - 0.35 | 544 | 0.28         | 0.20 - 0.35 | 1133 | 0.26 | 0.21 - 0.32 | 1049 | 0.27 | 0.21 - 0.32 |
| Total phosphoglycerides (mmol/L)                            | 543         | 0.28 | 0.20 - 0.36 | 502 | 0.24 | 0.16 - 0.32  | 584 | 0.27 | 0.19 - 0.34 | 542 | 0.29         | 0.21 - 0.36 | 1127 | 0.27 | 0.22 - 0.33 | 1044 | 0.26 | 0.20 - 0.32 |
| Ratio of triglycerides to phosphoglycerides                 | 543         | 0.23 | 0.15 - 0.31 | 502 | 0.24 | 0.16 - 0.32  | 584 | 0.21 | 0.13 - 0.28 | 542 | 0.20         | 0.12 - 0.28 | 1127 | 0.22 | 0.16 - 0.27 | 1044 | 0.22 | 0.16 - 0.28 |
| Phosphatidylcholine & other cholines (mmol/L)               | 542         | 0.28 | 0.20 - 0.36 | 501 | 0.23 | 0.15 - 0.32  | 584 | 0.26 | 0.19 - 0.34 | 542 | 0.28         | 0.20 - 0.36 | 1126 | 0.27 | 0.21 - 0.32 | 1043 | 0.26 | 0.20 - 0.31 |
| Sphingomyelins (mmol/L)                                     | 542         | 0.23 | 0.15 - 0.31 | 501 | 0.20 | 0.12 - 0.29  | 584 | 0.28 | 0.21 - 0.36 | 542 | 0.30         | 0.22 - 0.37 | 1126 | 0.26 | 0.20 - 0.31 | 1043 | 0.26 | 0.20 - 0.31 |
| Total cholines (mmol/L)                                     | 542         | 0.27 | 0.19 - 0.35 | 501 | 0.23 | 0.14 - 0.31  | 584 | 0.29 | 0.21 - 0.36 | 542 | 0.30         | 0.22 - 0.37 | 1126 | 0.28 | 0.22 - 0.33 | 1043 | 0.26 | 0.20 - 0.32 |
| <b>Apolipoproteins</b>                                      |             |      |             |     |      |              |     |      |             |     |              |             |      |      |             |      |      |             |
| Apolipoprotein A1 (g/L)                                     | 547         | 0.26 | 0.18 - 0.34 | 505 | 0.23 | 0.14 - 0.31  | 586 | 0.25 | 0.17 - 0.33 | 544 | 0.25         | 0.17 - 0.32 | 1133 | 0.25 | 0.20 - 0.31 | 1049 | 0.23 | 0.18 - 0.29 |
| Apolipoprotein B (g/L)                                      | 547         | 0.27 | 0.19 - 0.35 | 505 | 0.27 | 0.19 - 0.35  | 585 | 0.28 | 0.20 - 0.35 | 543 | 0.30         | 0.22 - 0.37 | 1132 | 0.28 | 0.23 - 0.33 | 1048 | 0.29 | 0.23 - 0.34 |
| Ratio of apolipoprotein B to apolipoprotein AI              | 547         | 0.26 | 0.18 - 0.33 | 505 | 0.27 | 0.18 - 0.34  | 585 | 0.21 | 0.13 - 0.29 | 543 | 0.20         | 0.12 - 0.28 | 1132 | 0.23 | 0.18 - 0.29 | 1048 | 0.24 | 0.18 - 0.29 |
| <b>Fatty acids</b>                                          |             |      |             |     |      |              |     |      |             |     |              |             |      |      |             |      |      |             |
| Total fatty acids (mmol/L)                                  | 537         | 0.26 | 0.18 - 0.33 | 496 | 0.25 | 0.17 - 0.33  | 583 | 0.30 | 0.22 - 0.37 | 541 | 0.31         | 0.23 - 0.39 | 1120 | 0.28 | 0.23 - 0.33 | 1037 | 0.29 | 0.23 - 0.34 |
| Estimated degree of unsaturation                            | 537         | 0.30 | 0.22 - 0.37 | 496 | 0.32 | 0.23 - 0.39  | 583 | 0.24 | 0.17 - 0.32 | 541 | 0.22         | 0.14 - 0.30 | 1120 | 0.27 | 0.21 - 0.32 | 1037 | 0.26 | 0.20 - 0.32 |
| 22:6, docosahexaenoic acid (mmol/L)                         | 537         | 0.23 | 0.15 - 0.31 | 496 | 0.21 | 0.13 - 0.30  | 583 | 0.33 | 0.26 - 0.40 | 541 | 0.33         | 0.25 - 0.40 | 1120 | 0.28 | 0.23 - 0.34 | 1037 | 0.27 | 0.21 - 0.32 |
| 18:2, linoleic acid (mmol/L)                                | 537         | 0.24 | 0.16 - 0.32 | 496 | 0.25 | 0.16 - 0.33  | 583 | 0.27 | 0.19 - 0.34 | 541 | 0.29         | 0.21 - 0.37 | 1120 | 0.26 | 0.21 - 0.32 | 1037 | 0.28 | 0.22 - 0.33 |
| Omega3 fatty acids (mmol/L)                                 | 537         | 0.24 | 0.16 - 0.32 | 496 | 0.22 | 0.14 - 0.31  | 583 | 0.34 | 0.27 - 0.41 | 541 | 0.34         | 0.27 - 0.41 | 1120 | 0.29 | 0.23 - 0.34 | 1037 | 0.28 | 0.22 - 0.33 |
| Omega6 fatty acids (mmol/L)                                 | 537         | 0.26 | 0.18 - 0.33 | 496 | 0.25 | 0.16 - 0.33  | 583 | 0.30 | 0.23 - 0.38 | 541 | 0.33         | 0.25 - 0.40 | 1120 | 0.28 | 0.23 - 0.34 | 1037 | 0.29 | 0.24 - 0.35 |
| Polynsat. fatty acids (mmol/L)                              | 537         | 0.26 | 0.17 - 0.33 | 496 | 0.24 | 0.16 - 0.33  | 583 | 0.31 | 0.24 - 0.39 | 541 | 0.34         | 0.26 - 0.41 | 1120 | 0.29 | 0.23 - 0.34 | 1037 | 0.29 | 0.24 - 0.35 |
| Monounsat. fatty acids; 16:1, 18:1 (mmol/L)                 | 537         | 0.27 | 0.19 - 0.35 | 496 | 0.28 | 0.19 - 0.36  | 583 | 0.30 | 0.22 - 0.37 | 541 | 0.30         | 0.23 - 0.38 | 1120 | 0.29 | 0.24 - 0.34 | 1037 | 0.29 | 0.24 - 0.35 |
| Saturated fatty acids (mmol/L)                              | 537         | 0.25 | 0.17 - 0.33 | 496 | 0.25 | 0.16 - 0.33  | 583 | 0.28 | 0.20 - 0.35 | 541 | 0.28         | 0.20 - 0.36 | 1120 | 0.27 | 0.21 - 0.32 | 1037 | 0.27 | 0.21 - 0.32 |
| <b>Fatty acid ratios</b>                                    |             |      |             |     |      |              |     |      |             |     |              |             |      |      |             |      |      |             |
| Ratio of 22:6 docosahexaenoic acid to total fatty acids (%) | 537         | 0.31 | 0.23 - 0.38 | 496 | 0.30 | 0.21 - 0.37  | 583 | 0.33 | 0.26 - 0.40 | 541 | 0.31         | 0.23 - 0.38 | 1120 | 0.32 | 0.27 - 0.37 | 1037 | 0.30 | 0.24 - 0.36 |
| Ratio of 18:2 linoleic acid to total fatty acids (%)        | 537         | 0.15 | 0.07 - 0.23 | 496 | 0.17 | 0.08 - 0.25  | 583 | 0.18 | 0.10 - 0.26 | 541 | 0.16         | 0.08 - 0.24 | 1120 | 0.17 | 0.11 - 0.23 | 1037 | 0.16 | 0.10 - 0.22 |
| Ratio of omega3 fatty acids to total fatty acids (%)        | 537         | 0.32 | 0.24 - 0.39 | 496 | 0.32 | 0.23 - 0.39  | 583 | 0.40 | 0.33 - 0.47 | 541 | 0.38         | 0.31 - 0.45 | 1120 | 0.36 | 0.31 - 0.41 | 1037 | 0.35 | 0.29 - 0.40 |
| Ratio of omega6 fatty acids to total fatty acids (%)        | 537         | 0.24 | 0.16 -      |     |      |              |     |      |             |     |              |             |      |      |             |      |      |             |

### Supplementary Figure 1: Correlations between Child Health CheckPoint metabolites - children

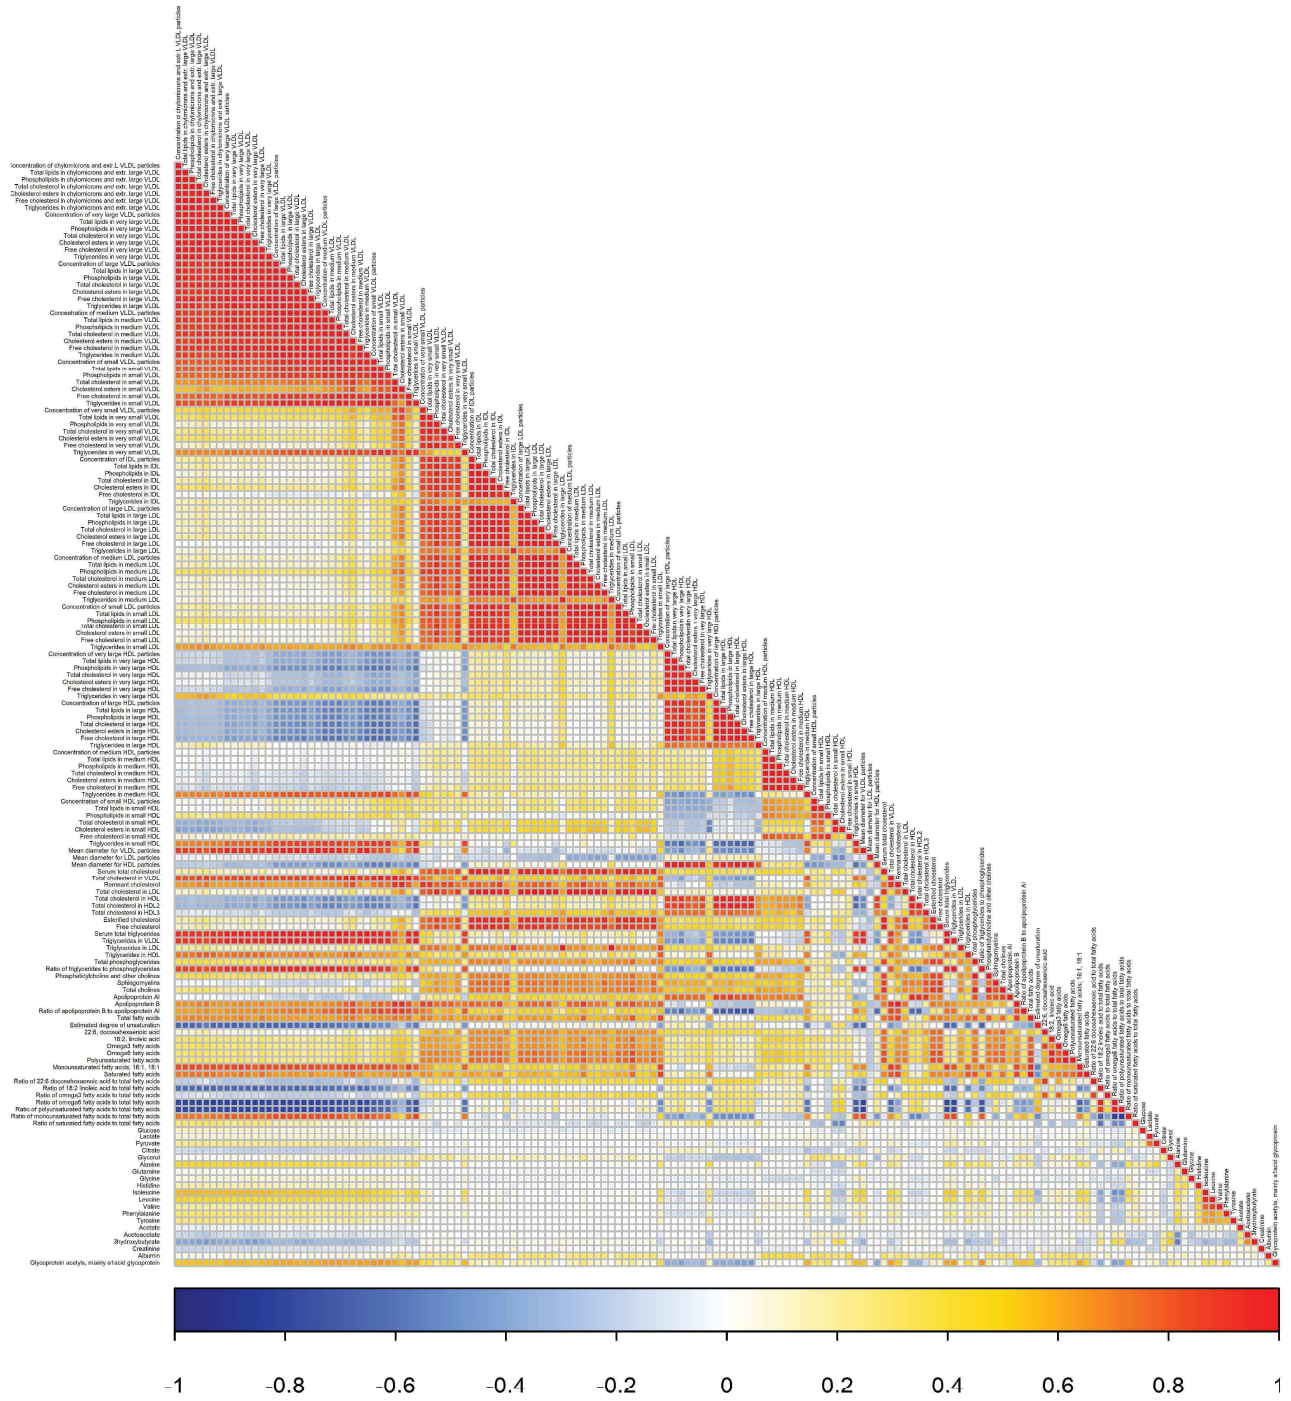

Note: Correlations (spearman) between metabolites for the CheckPoint child metabolomics data

### Supplementary figure 1: Correlation of NMR measures in children.

Heatmap showing the correlation between metabolite measures in children. The correlations shown are Spearman's correlation coefficients with blue cells representing negative correlations and red cells representing positive correlations.

For peer review only: <http://bmjopen.bmj.com/site/about/guidelines.xhtml>



Supplementary Figure 2: Correlations between Child Health CheckPoint metabolites - parents

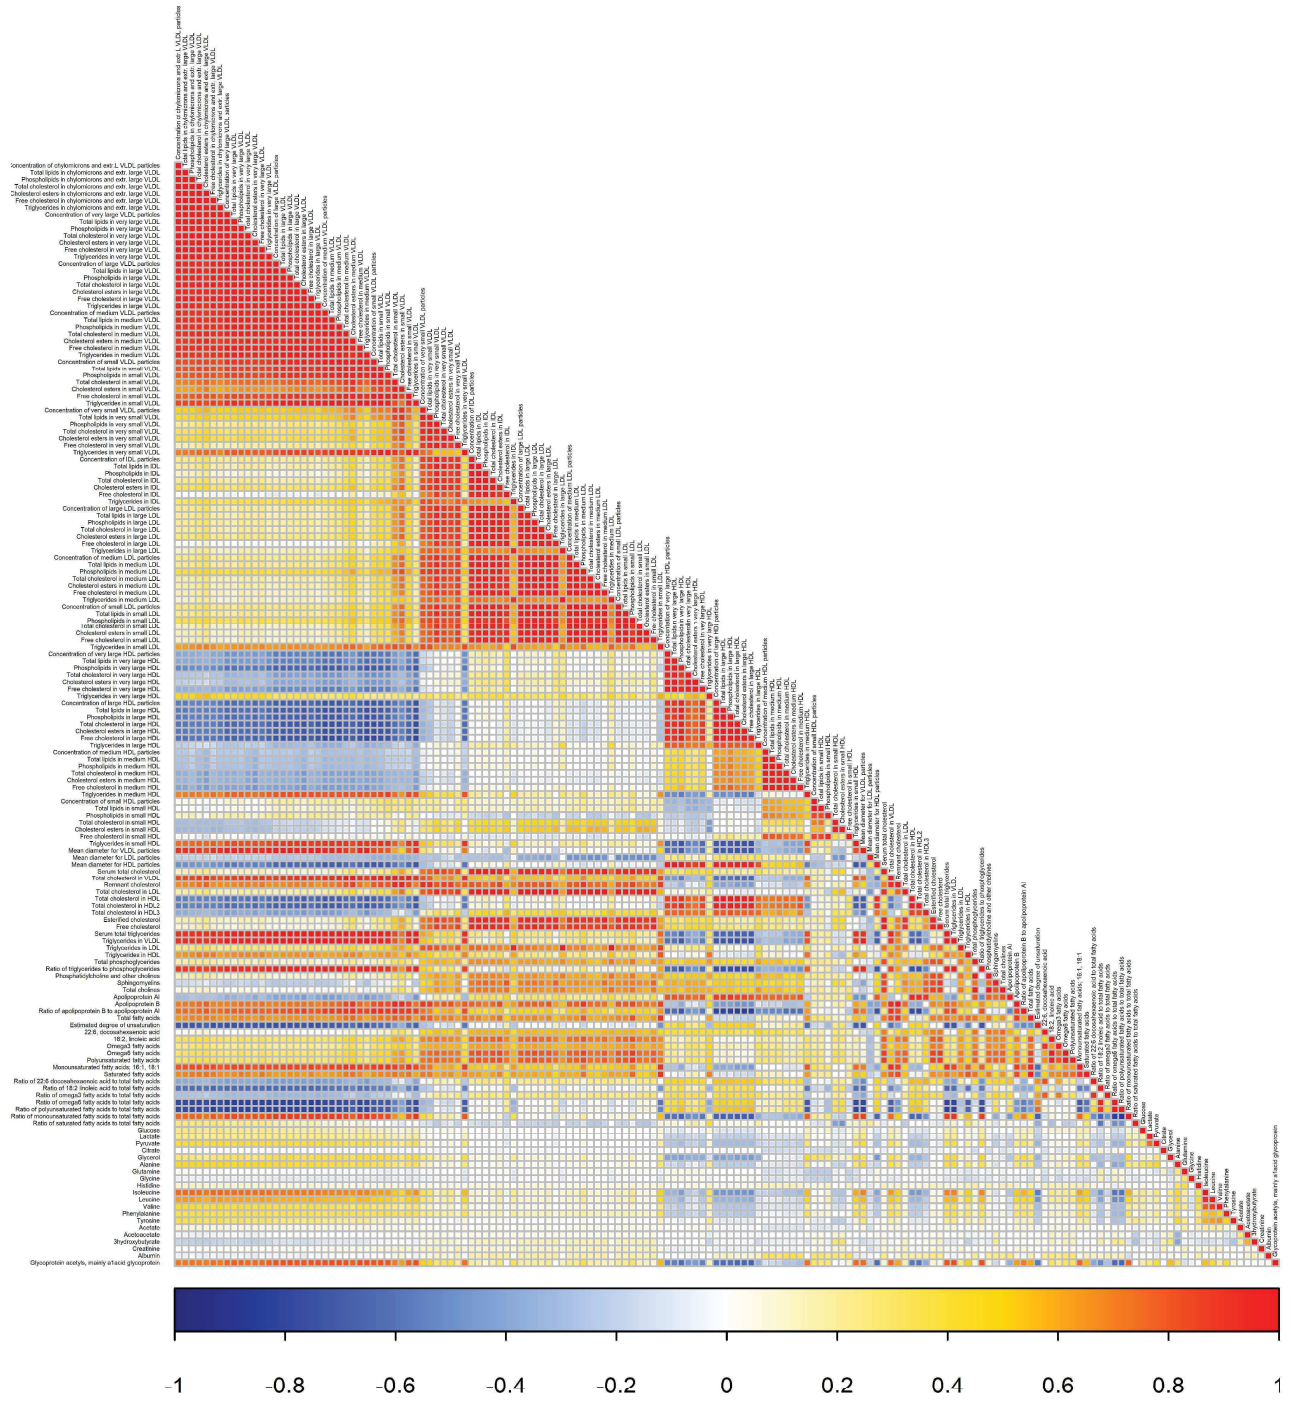

Note: Correlations (spearman) between metabolites for the CheckPoint parent metabolomics data

Supplementary figure 2: Correlation of NMR metabolite measures in parents.

Heatmap showing the correlation between metabolite measures in parents. The correlations shown are Spearman's correlation coefficients with blue cells representing negative correlations and red cells representing positive correlations.

Supplementary figure 3: Density plots for cholesterol and apolipoprotein measures.

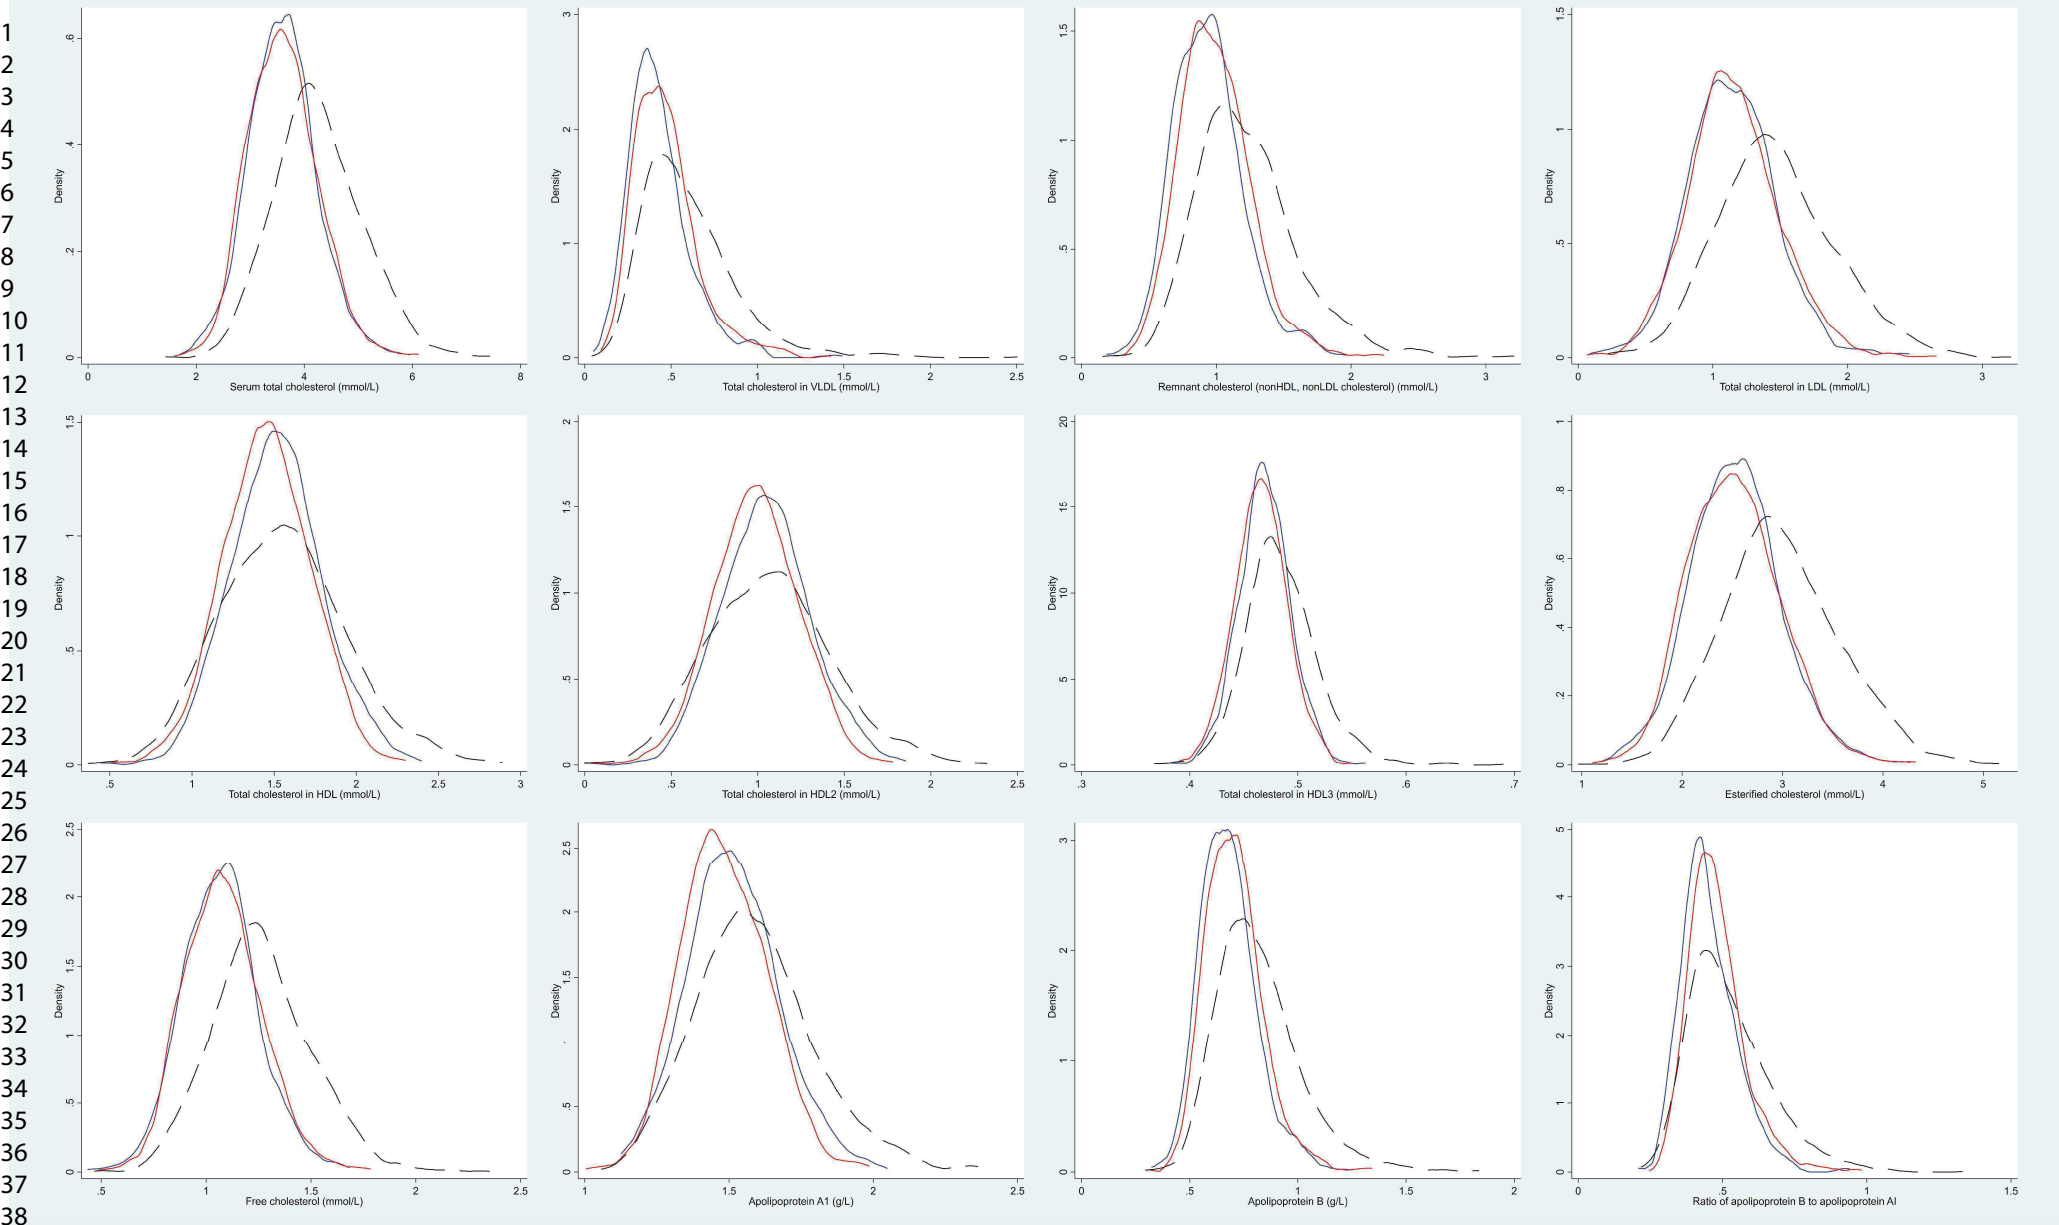

— Boys
 — Girls  
 - - - All parents

Boys (blue), girls (red), and all parents (thin dotted black line) plotted on the same graph for each cholesterol and apolipoprotein measure.



**Supplementary figure 4: Density plots for fatty acid and fatty acid ratio measures.**

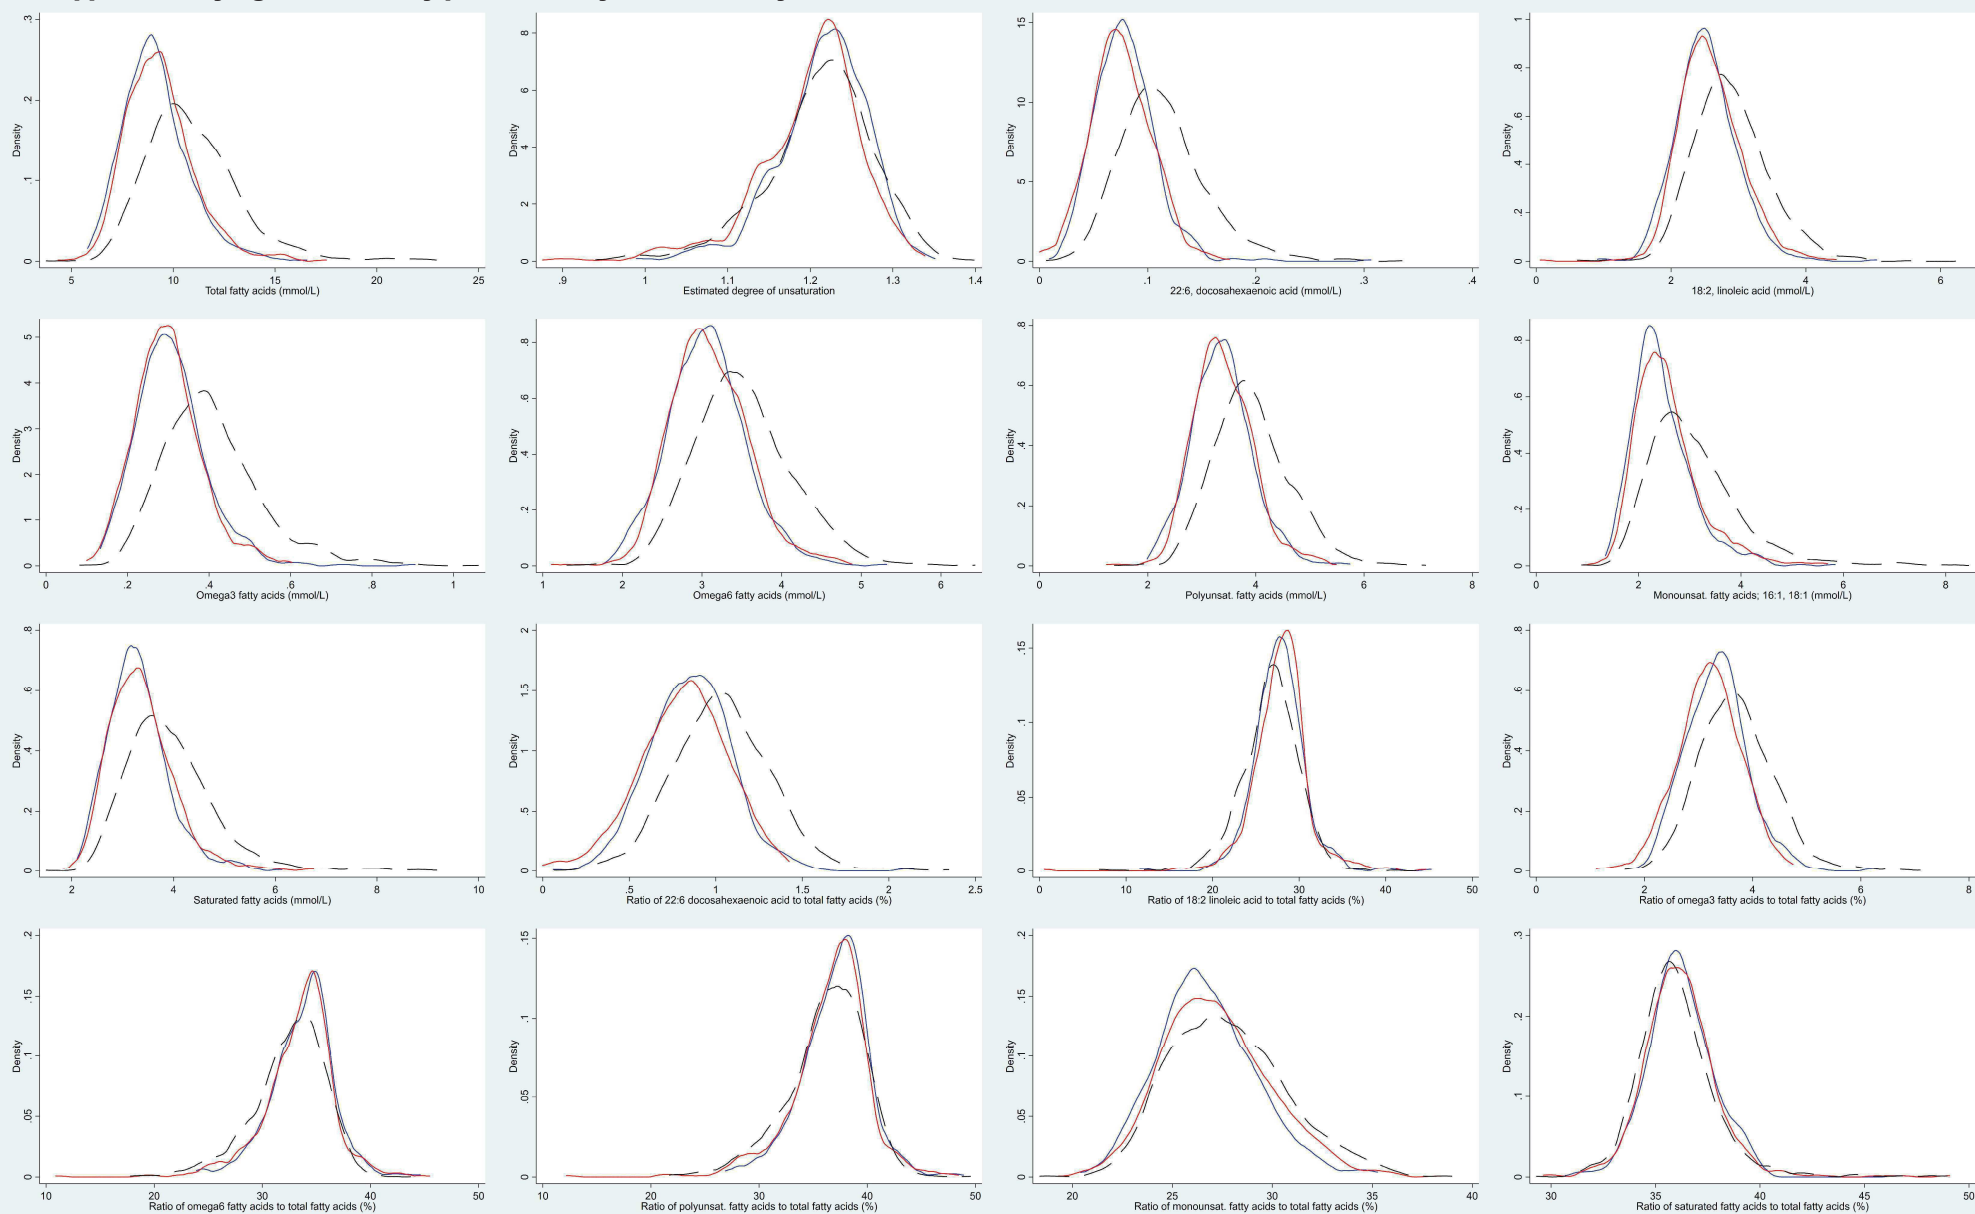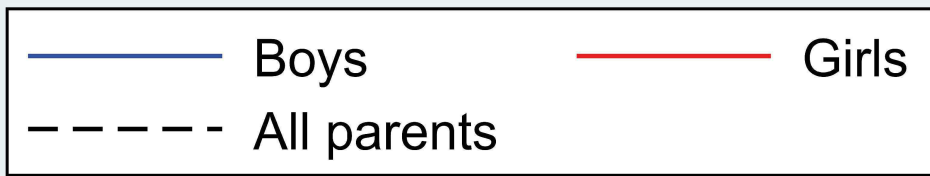

Boys (blue), girls (red), and all parents (thin dotted black line) plotted on the same graph for each fatty acid and fatty acid ratio measure.

Preprint BMJ Open 2019;19:e024444. <https://doi.org/10.1136/bmjopen-2019-024444>

Supplementary figure 5: Density plots for total lipids in the 14 lipoprotein subclass particles.

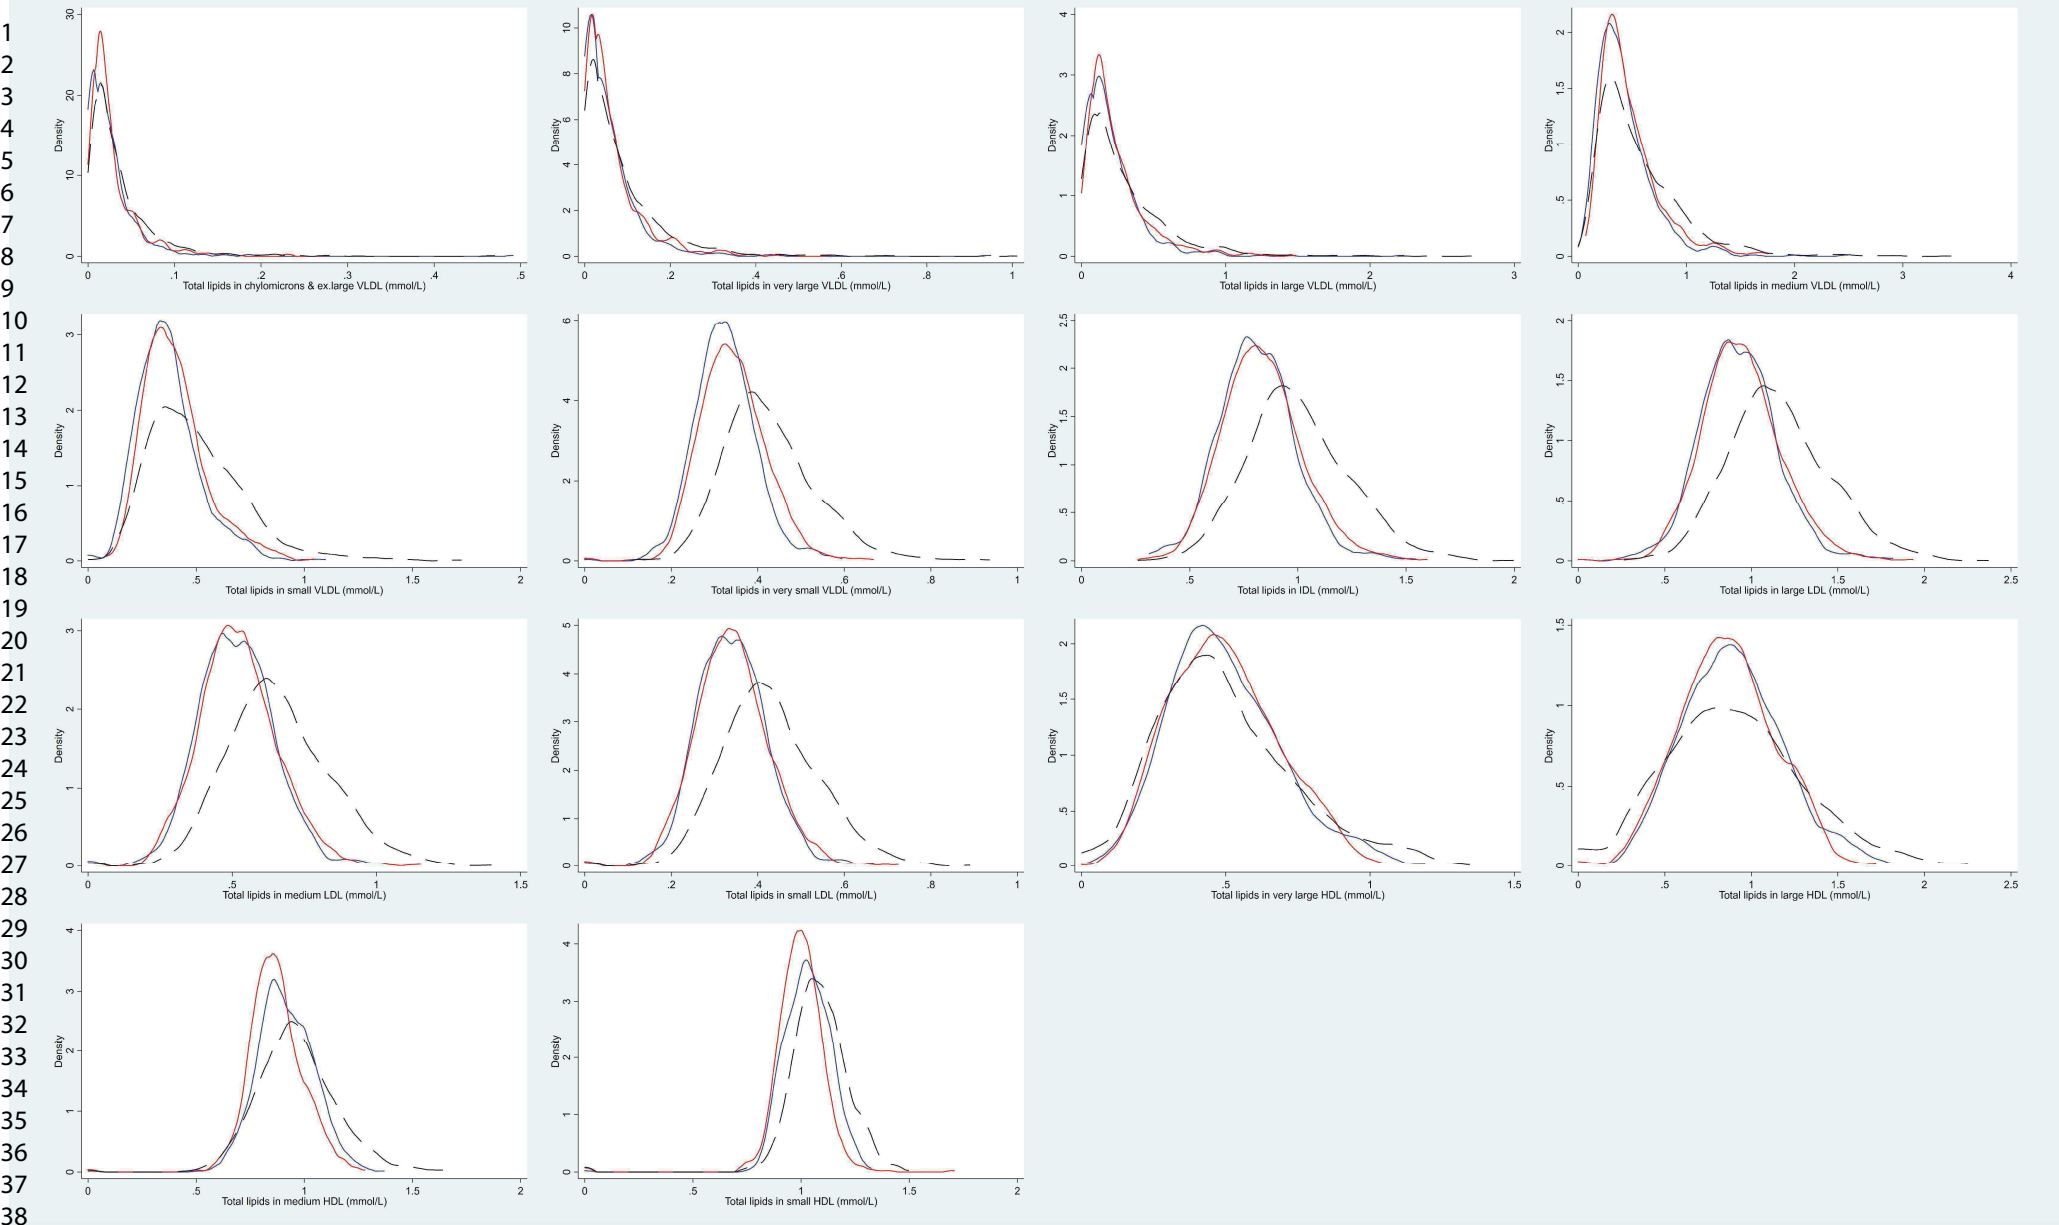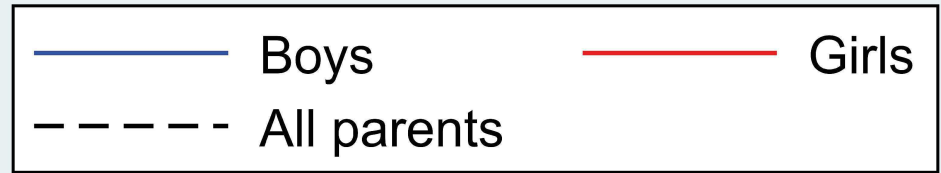

Boys (blue), girls (red), and all parents (thin dotted black line) plotted on the same graph for total lipids within each of the 14 lipoprotein subclass particles.

For peer review only: <http://bmjopen.bmj.com/site/about/guidelines.xhtml>

**Supplementary figure 6: Density plots for lipoprotein particle size and triglyceride measures.**

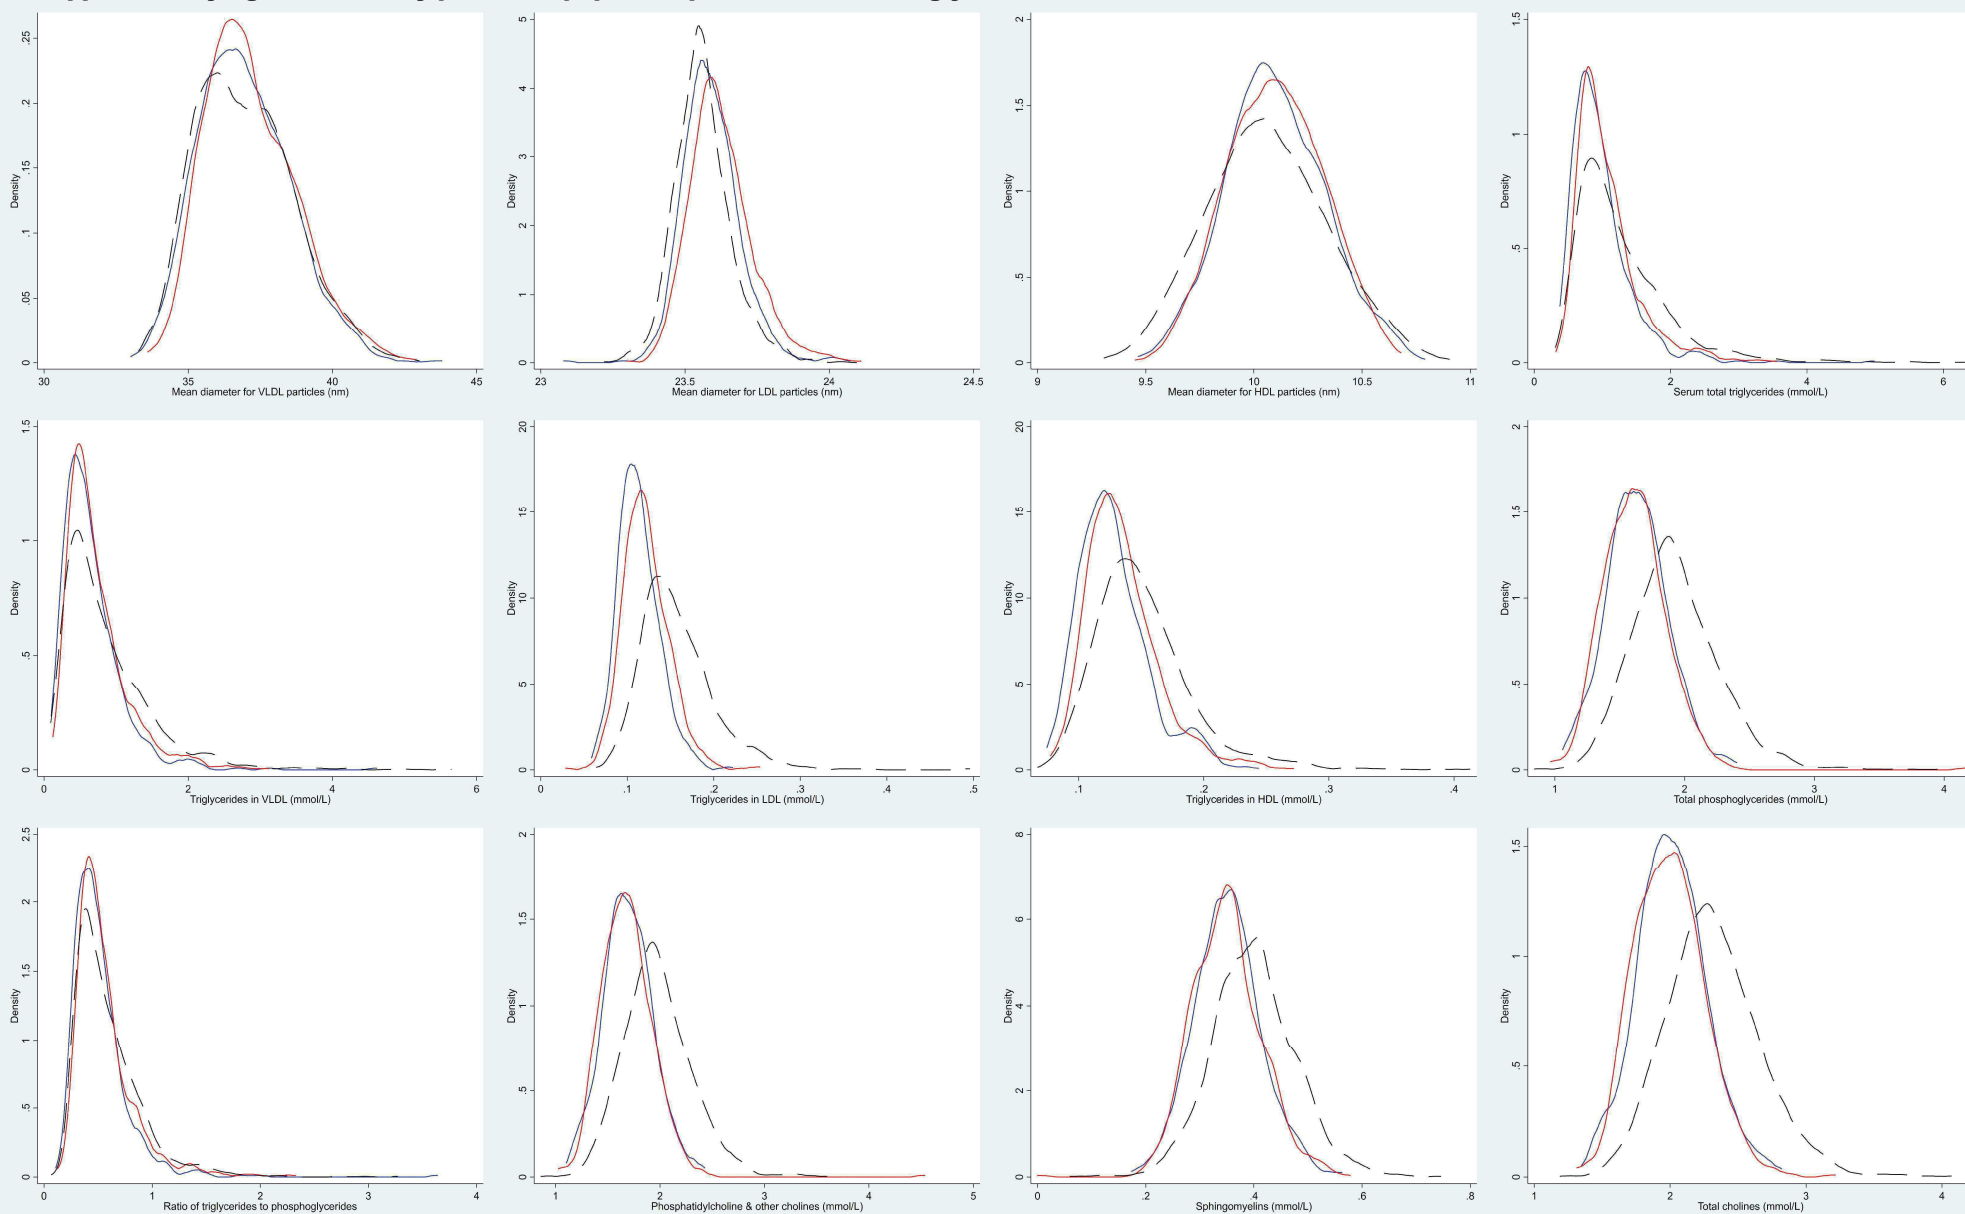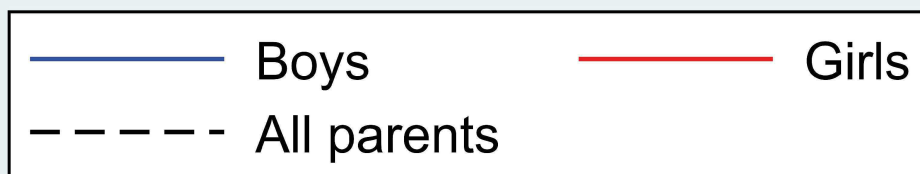

Boys (blue), girls (red), and all parents (thin dotted black line) plotted on the same graph for lipoprotein particle sizes and triglyceride measures.

For peer review only: <http://bmjopen.bmj.com/site/about/guidelines.xhtml>

Supplementary figure 7: Density plots for glycolysis related, amino acid, ketone body, fluid balance and inflammation measures.

1  
2  
3  
4  
5  
6  
7  
8  
9  
10  
11  
12  
13  
14  
15  
16  
17  
18  
19  
20  
21  
22  
23  
24  
25  
26  
27  
28  
29  
30  
31  
32  
33  
34  
35  
36  
37  
38  
39  
40  
41  
42  
43  
44  
45  
46  
47

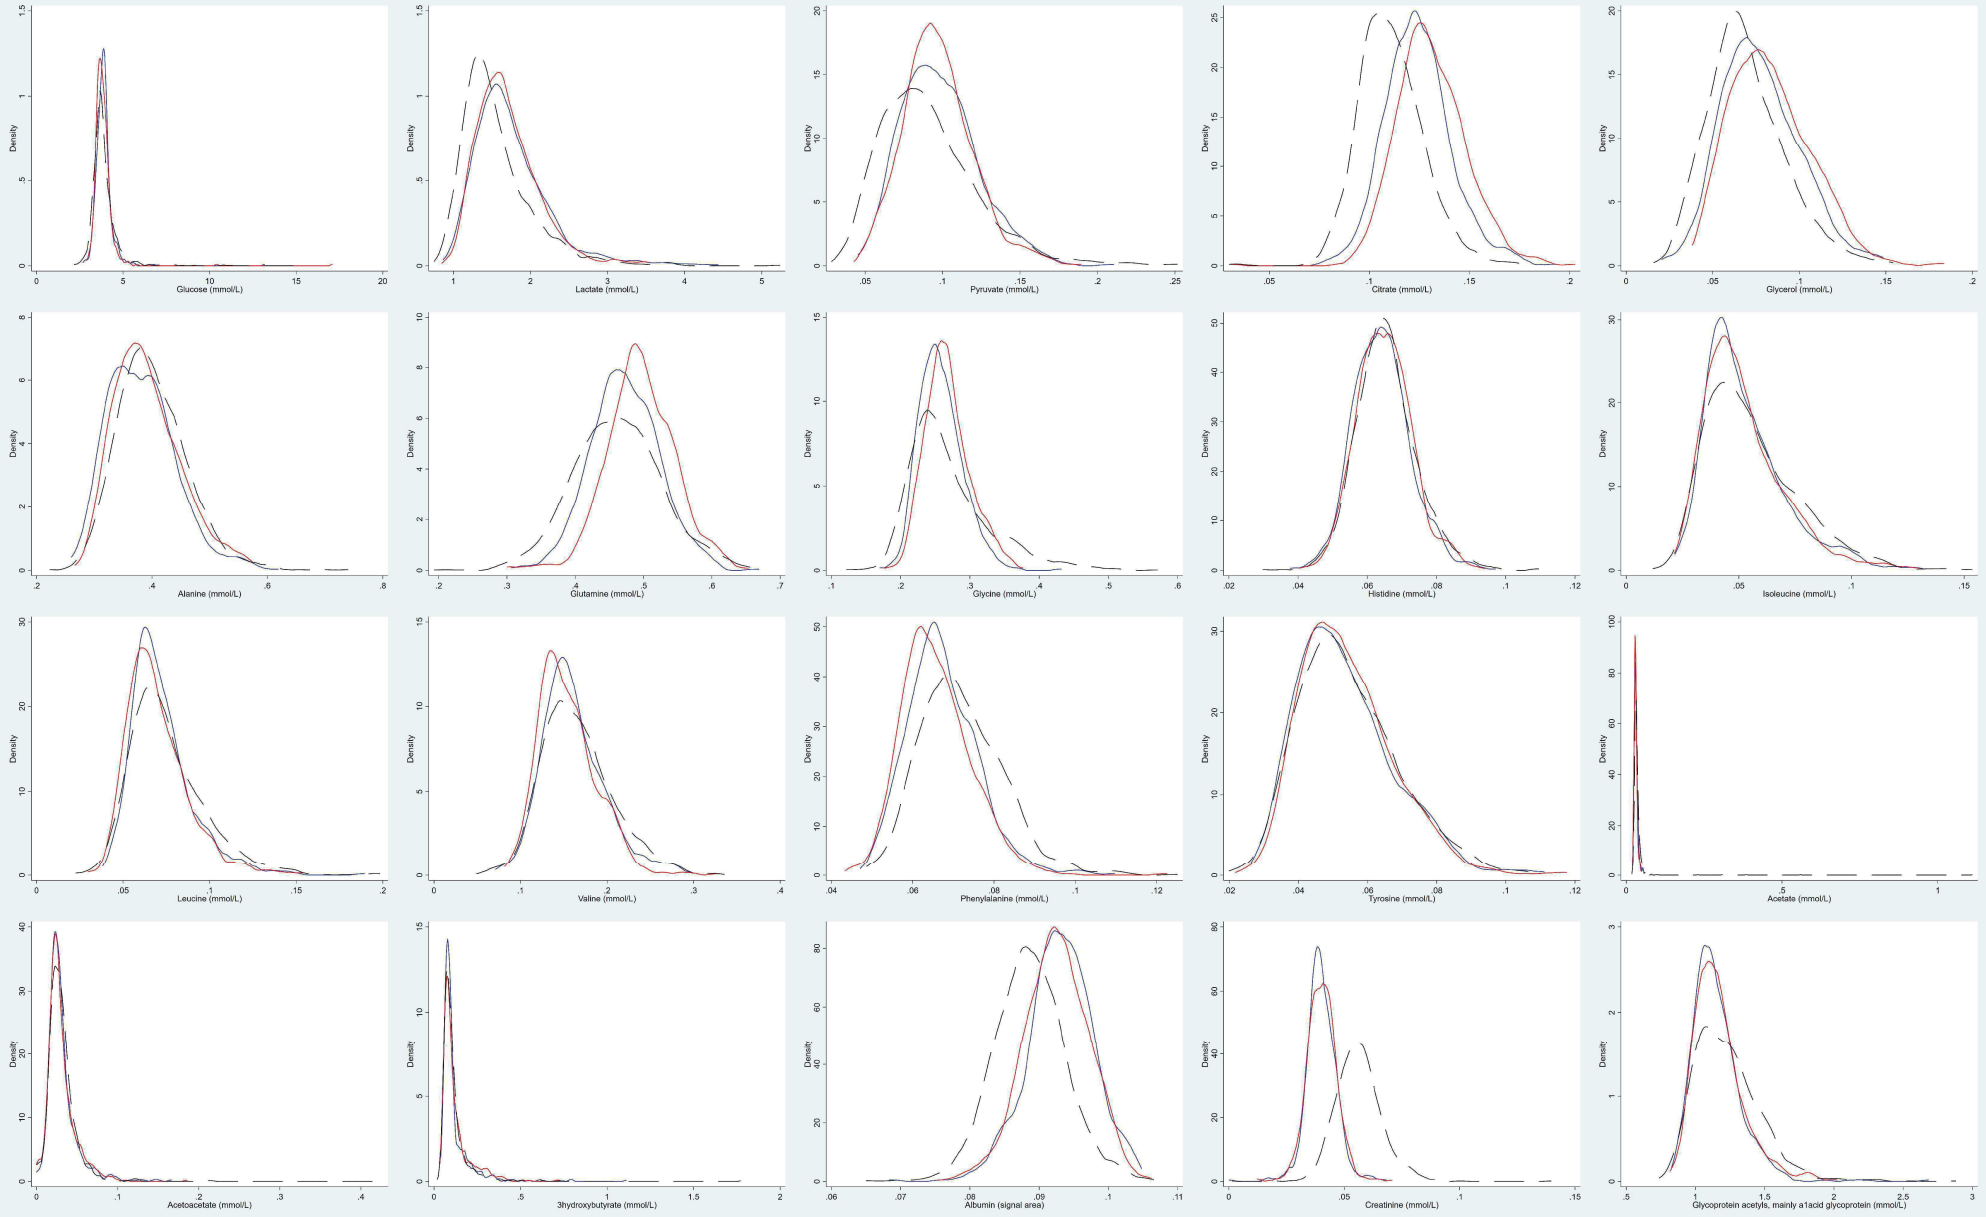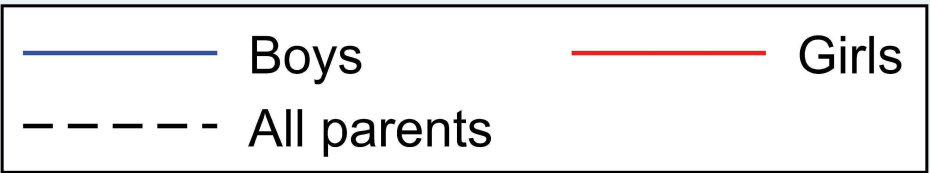

Boys (blue), girls (red), and all parents (thin dotted black line) plotted on the same graph for glycolysis related, amino acid, ketone body, fluid balance and inflammation measures.

## STROBE Statement—checklist of items that should be included in reports of observational studies

**Paper title:** Metabolomics: Population epidemiology and concordance in 11-12 year old

Australians and their parents

**Person completing checklist:** Susan Ellul

|                              | Item No | Recommendation                                                                                                                                                                                                                                                                                                                                                                                                                                                                   | Page number | Line number                                         |
|------------------------------|---------|----------------------------------------------------------------------------------------------------------------------------------------------------------------------------------------------------------------------------------------------------------------------------------------------------------------------------------------------------------------------------------------------------------------------------------------------------------------------------------|-------------|-----------------------------------------------------|
| <b>Title and abstract</b>    | 1       | (a) Indicate the study's design with a commonly used term in the title or the abstract                                                                                                                                                                                                                                                                                                                                                                                           | 2           | 14-15                                               |
|                              |         | (b) Provide in the abstract an informative and balanced summary of what was done and what was found                                                                                                                                                                                                                                                                                                                                                                              | 2           | 9-13<br>25-32                                       |
| <b>Introduction</b>          |         |                                                                                                                                                                                                                                                                                                                                                                                                                                                                                  |             |                                                     |
| Background/rationale         | 2       | Explain the scientific background and rationale for the investigation being reported                                                                                                                                                                                                                                                                                                                                                                                             | 4-5         | Pg 4 (3-9 ,21-22, 31-32, 33-35)<br>Pg 5 (5-7)       |
| Objectives                   | 3       | State specific objectives, including any prespecified hypotheses                                                                                                                                                                                                                                                                                                                                                                                                                 | 5           | 8-11                                                |
| <b>Methods</b>               |         |                                                                                                                                                                                                                                                                                                                                                                                                                                                                                  |             |                                                     |
| Study design                 | 4       | Present key elements of study design early in the paper                                                                                                                                                                                                                                                                                                                                                                                                                          | 5           | 14-22                                               |
| Setting                      | 5       | Describe the setting, locations, and relevant dates, including periods of recruitment, exposure, follow-up, and data collection                                                                                                                                                                                                                                                                                                                                                  | 5-6         | Pg 5 (17-20)<br>Pg 6 (3-32)                         |
| Participants                 | 6       | (a) <i>Cohort study</i> —Give the eligibility criteria, and the sources and methods of selection of participants. Describe methods of follow-up<br><del><i>Case control study</i>—Give the eligibility criteria, and the sources and methods of case ascertainment and control selection. Give the rationale for the choice of cases and controls</del><br><i>Cross-sectional study</i> —Give the eligibility criteria, and the sources and methods of selection of participants | 5           | 23-31                                               |
|                              |         | (b) <del><i>Cohort study</i>—For matched studies, give matching criteria and number of exposed and unexposed</del><br><del><i>Case control study</i>—For matched studies, give matching criteria and the number of controls per case</del>                                                                                                                                                                                                                                       |             |                                                     |
| Variables                    | 7       | Clearly define all outcomes, exposures, predictors, potential confounders, and effect modifiers. Give diagnostic criteria, if applicable                                                                                                                                                                                                                                                                                                                                         | 7-9         | Pg 7 (4-17)<br>Pg 8 ( table 1, 9-16)<br>Pg 9 (1-24) |
| Data sources/<br>measurement | 8*      | For each variable of interest, give sources of data and details of methods of assessment (measurement). Describe comparability of assessment methods if there is more than one group                                                                                                                                                                                                                                                                                             | 7-9         | Pg 7 (4-17)<br>Pg 8 ( table 1, 9-16)<br>Pg 9 (1-24) |
| Bias                         | 9       | Describe any efforts to address potential sources of bias                                                                                                                                                                                                                                                                                                                                                                                                                        | 9 -10       | Pg 9 (31-35)<br>Pg 10 (16-18)                       |

|                        |    |                                                                                                                              |       |                               |
|------------------------|----|------------------------------------------------------------------------------------------------------------------------------|-------|-------------------------------|
| Study size             | 10 | Explain how the study size was arrived at                                                                                    | 11    | 5-14, figure 1                |
| Quantitative variables | 11 | Explain how quantitative variables were handled in the analyses. If applicable, describe which groupings were chosen and why | 9-10  | Pg 9 (28-35)<br>Pg 10 (3-15)  |
| Statistical methods    | 12 | (a) Describe all statistical methods, including those used to control for confounding                                        | 9-10  | Pg 9 (28-35)<br>Pg 10 (3-15)  |
|                        |    | (b) Describe any methods used to examine subgroups and interactions                                                          | 9-10  | Pg 9 (28-35)<br>Pg 10 (3-15)  |
|                        |    | (c) Explain how missing data were addressed                                                                                  | 9 -10 | Pg 9 (31-35)<br>Pg 10 (16-18) |
|                        |    | (d) <i>Cohort study</i> —If applicable, explain how loss to follow-up was addressed                                          | 9     | 31-35                         |
|                        |    | <del>(e) <i>Case-control study</i>—If applicable, explain how matching of cases and controls was addressed</del>             |       |                               |
|                        |    | (e) Describe any sensitivity analyses                                                                                        | 10    | 16-18                         |

| <b>Results</b>   |     |                                                                                                                                                                                                              | <b>Page number</b>                 | <b>Line number</b> |
|------------------|-----|--------------------------------------------------------------------------------------------------------------------------------------------------------------------------------------------------------------|------------------------------------|--------------------|
| Participants     | 13* | (a) Report numbers of individuals at each stage of study—eg numbers potentially eligible, examined for eligibility, confirmed eligible, included in the study, completing follow-up, and analysed            | 11 and figure 1                    | 5-12               |
|                  |     | (b) Give reasons for non-participation at each stage                                                                                                                                                         | 11<br>6<br>figure 1                | 8-12<br>7-11       |
|                  |     | (c) Consider use of a flow diagram                                                                                                                                                                           | figure 1                           |                    |
| Descriptive data | 14* | (a) Give characteristics of study participants (eg demographic, clinical, social) and information on exposures and potential confounders                                                                     | 12<br>(table 2)                    | 2                  |
|                  |     | (b) Indicate number of participants with missing data for each variable of interest                                                                                                                          | figure 1<br>table 2<br>sup Table 1 | 2                  |
|                  |     | (c) <i>Cohort study</i> —Summarise follow-up time (eg, average and total amount)                                                                                                                             | NA                                 |                    |
| Outcome data     | 15* | <i>Cohort study</i> —Report numbers of outcome events or summary measures over time                                                                                                                          | sup table 1                        |                    |
|                  |     | <i>Case-control study</i> —Report numbers in each exposure category, or summary measures of exposure                                                                                                         | NA                                 |                    |
|                  |     | <i>Cross-sectional study</i> —Report numbers of outcome events or summary measures                                                                                                                           | NA                                 |                    |
| Main results     | 16  | (a) Give unadjusted estimates and, if applicable, confounder-adjusted estimates and their precision (eg, 95% confidence interval). Make clear which confounders were adjusted for and why they were included | 13<br>supp tables<br>2-6           | 21-24              |
|                  |     | (b) Report category boundaries when continuous variables were categorized                                                                                                                                    | NA                                 |                    |



|                          |    |                                                                                                                                                                            |                    |                                                            |
|--------------------------|----|----------------------------------------------------------------------------------------------------------------------------------------------------------------------------|--------------------|------------------------------------------------------------|
|                          |    | (c) If relevant, consider translating estimates of relative risk into absolute risk for a meaningful time period                                                           | NA                 |                                                            |
| Other analyses           | 17 | Report other analyses done—eg analyses of subgroups and interactions, and sensitivity analyses                                                                             | supp tables<br>2-6 |                                                            |
| <b>Discussion</b>        |    |                                                                                                                                                                            |                    |                                                            |
| Key results              | 18 | Summarise key results with reference to study objectives                                                                                                                   | 14                 | 3-10                                                       |
| Limitations              | 19 | Discuss limitations of the study, taking into account sources of potential bias or imprecision. Discuss both direction and magnitude of any potential bias                 | 14                 | 18-28                                                      |
| Interpretation           | 20 | Give a cautious overall interpretation of results considering objectives, limitations, multiplicity of analyses, results from similar studies, and other relevant evidence | 14-17              | Pg 14 (30-32)<br>Pg 15 (all)<br>Pg 16 (all)<br>Pg 17 (1-2) |
| Generalisability         | 21 | Discuss the generalisability (external validity) of the study results                                                                                                      | 14                 | 18-28                                                      |
| <b>Other information</b> |    |                                                                                                                                                                            |                    |                                                            |
| Funding                  | 22 | Give the source of funding and the role of the funders for the present study and, if applicable, for the original study on which the present article is based              | 18-19              | Pg 18 (21-33)<br>Pg 19 (1-2)                               |

\*Give information separately for cases and controls in case-control studies and, if applicable, for exposed and unexposed groups in cohort and cross-sectional studies.

**Note:** An Explanation and Elaboration article discusses each checklist item and gives methodological background and published examples of transparent reporting. The STROBE checklist is best used in conjunction with this article (freely available on the Web sites of PLoS Medicine at <http://www.plosmedicine.org/>, Annals of Internal Medicine at <http://www.annals.org/>, and Epidemiology at <http://www.epidem.com/>). Information on the STROBE Initiative is available at [www.strobe-statement.org](http://www.strobe-statement.org).

# BMJ Open

## Metabolomics: Population epidemiology and concordance in 11-12 year old Australians and their parents

|                                 |                                                                                                                                                                                                                                                                                                                                                                                                                                                                                                                                                                                                                                                                                                                                                                                                                                                                                                                           |
|---------------------------------|---------------------------------------------------------------------------------------------------------------------------------------------------------------------------------------------------------------------------------------------------------------------------------------------------------------------------------------------------------------------------------------------------------------------------------------------------------------------------------------------------------------------------------------------------------------------------------------------------------------------------------------------------------------------------------------------------------------------------------------------------------------------------------------------------------------------------------------------------------------------------------------------------------------------------|
| Journal:                        | <i>BMJ Open</i>                                                                                                                                                                                                                                                                                                                                                                                                                                                                                                                                                                                                                                                                                                                                                                                                                                                                                                           |
| Manuscript ID                   | bmjopen-2017-020900.R2                                                                                                                                                                                                                                                                                                                                                                                                                                                                                                                                                                                                                                                                                                                                                                                                                                                                                                    |
| Article Type:                   | Research                                                                                                                                                                                                                                                                                                                                                                                                                                                                                                                                                                                                                                                                                                                                                                                                                                                                                                                  |
| Date Submitted by the Author:   | 10-Oct-2018                                                                                                                                                                                                                                                                                                                                                                                                                                                                                                                                                                                                                                                                                                                                                                                                                                                                                                               |
| Complete List of Authors:       | Ellul, Susan; Murdoch Children's Research Institute<br>Wake, Melissa; Murdoch Children's Research Institute; University of Auckland, Department of Paediatrics & The Liggins Institute<br>Clifford, Susan; Murdoch Children's Research Institute; The University of Melbourne<br>Lange, Katherine; Murdoch Children's Research Institute<br>Wurtz, Peter; University of Helsinki, Research Programs Unit, Diabetes and Obesity; Nightingale Health Ltd.<br>Juonala, Markus; University of Turku, Department of Medicine<br>Dwyer, Terry; Murdoch Children's Research Institute; The University of Melbourne<br>Carlin, John; Murdoch Children's Research Institute,<br>Burgner, David; Murdoch Children's Research Institute; Monash University, Department of Paediatrics<br>Saffery, Richard; Murdoch Children's Research Institute, Cancer and Disease Epigenetics; University of Melbourne, Department of Paediatrics |
| <b>Primary Subject Heading</b>: | Epidemiology                                                                                                                                                                                                                                                                                                                                                                                                                                                                                                                                                                                                                                                                                                                                                                                                                                                                                                              |
| Secondary Subject Heading:      | Paediatrics, Public health, Diabetes and endocrinology                                                                                                                                                                                                                                                                                                                                                                                                                                                                                                                                                                                                                                                                                                                                                                                                                                                                    |
| Keywords:                       | Metabolomics, Lipids, Reference values, Children, Inheritance patterns, Epidemiologic studies                                                                                                                                                                                                                                                                                                                                                                                                                                                                                                                                                                                                                                                                                                                                                                                                                             |
|                                 |                                                                                                                                                                                                                                                                                                                                                                                                                                                                                                                                                                                                                                                                                                                                                                                                                                                                                                                           |

SCHOLARONE™  
Manuscripts

1 **Metabolomics: Population epidemiology and concordance in 11-12 year old Australians and their**  
2 **parents**

3  
4 **Authors:** Susan Ellul<sup>1</sup>, Melissa Wake<sup>1-3</sup>, Susan A. Clifford<sup>1,2</sup>, Katherine Lange<sup>1</sup>, Peter  
5 Würtz<sup>4,5</sup>, Markus Juonala<sup>6</sup>, Terence Dwyer<sup>1,2,7,8</sup>, John Carlin<sup>1,2</sup>, David Burgner<sup>1,2,9</sup> and  
6 Richard Saffery<sup>1,2</sup>.

7  
8 **Affiliations:** <sup>1</sup>Murdoch Children's Research Institute, Parkville, Victoria, Australia; <sup>2</sup>The  
9 University of Melbourne, Parkville, Victoria, Australia; <sup>3</sup>Dept of Paediatrics and the Liggins  
10 Institute, University of Auckland, Grafton, Auckland, New Zealand; <sup>4</sup>Research Programs  
11 Unit, Diabetes and Obesity, University of Helsinki, Helsinki, Finland; <sup>5</sup>Nightingale Health  
12 Ltd., Helsinki, Finland; <sup>6</sup>Department of Medicine, University of Turku, Finland, <sup>2</sup> Division of  
13 Medicine, Turku University Hospital, Turku, Finland; <sup>7</sup>The George Institute for Global  
14 Health, Nuffield Department of Obstetrics and Gynaecology, University of Oxford, Oxford,  
15 United Kingdom. <sup>8</sup>Institute for Medical Research, University of Tasmania, Hobart, Tasmania,  
16 Australia; <sup>9</sup>Department of Paediatrics, Monash University, Clayton, Victoria, Australia.

17  
18 **Correspondence to:** Professor Melissa Wake,  
19 Murdoch Children's Research Institute  
20 The Royal Children's Hospital  
21 50 Flemington Road, Parkville 3052, VIC Australia.  
22 Telephone: +61 3 9345 5761  
23 Email: melissa.wake@mcri.edu.au

24  
25 **Keywords:** Metabolomics; lipids; inflammation; reference values; parents; children;  
26 inheritance patterns; correlation studies; epidemiologic studies; cross-sectional studies.

27  
28 **Word count: 4328**

29  
30 **Abbreviations:** ApoA-1: Apolipoprotein A-1; Apo B: Apolipoprotein B; BCAA: Branched  
31 chain amino acid; BD: Becton Dickinson; CDC: Centers for Disease Prevention and Control;  
32 CVD: Cardiovascular disease; CPS1: Carbamoyl-phosphate synthase 1; DHA:  
33 Docosahexaenoic acid; DOB: Date of birth; EDTA: Ethylenediaminetetraacetic acid; FDR:  
34 False discovery rate; GlycA: Glycoprotein acetyls; HbA1c: Haemoglobin A1c; HDL: High-  
35 density lipoprotein; HOMA: Homeostatic model assessment; IDL: Intermediate density  
36 lipoprotein; LA: Linoleic acid; LDL: Low-density lipoprotein; LiH: Lithium Heparin; LSAC:

1 Longitudinal Study of Australian Children; MUFA: Monounsaturated fatty acid; NMR:  
2 Nuclear magnetic resonance; PCOS: Polycystic Ovary Syndrome; PUFA: Polyunsaturated  
3 fatty acid; REDCap: Research Electronic Data Capture; SFA: Saturated fatty acids; SST:  
4 serum separating tubes; T2D: Type 2 diabetes; T2DM: Type 2 diabetes mellitus; VLDL:  
5 Very low density lipoprotein; XL: Very large; XXL: Chylomicrons and extremely large; XS:  
6 Very small.

## 7 8 **ABSTRACT**

9  
10 **Objectives:** Nuclear Magnetic Resonance (NMR) metabolomics is high throughput and cost  
11 effective, with the potential to improve the understanding of disease and risk. We examine  
12 the circulating metabolic profile by quantitative NMR metabolomics of a sample of  
13 Australian 11-12 year old children and their parents, describe differences by age and sex, and  
14 explore correlation of metabolites in parent-child dyads.

15 **Design:** The population-based cross-sectional Child Health CheckPoint study nested within  
16 the Longitudinal Study of Australian Children.

17 **Setting:** Blood samples collected from CheckPoint participants at assessment centres in  
18 seven Australian cities and eight regional towns; February 2015-March 2016.

19 **Participants:** 1180 children and 1325 parents provided a blood sample and had  
20 metabolomics data available. This included 1133 parent-child dyads (518 mother-daughter,  
21 469 mother-son, 68 father-daughter, and 78 father-son).

22 **Outcome measures:** 228 metabolic measures were obtained for each participant. We  
23 focused on 74 biomarkers including amino acid species, lipoprotein subclass measures, lipids,  
24 fatty acids, measures related to fatty acid saturation, and composite markers of inflammation  
25 and energy homeostasis.

26 **Results:** We identified differences in the concentration of specific metabolites between  
27 childhood and adulthood and in metabolic profiles in children and adults by sex. In general,  
28 metabolite concentrations were higher in adults than children and sex differences were larger  
29 in adults than in children. Positive correlations were observed for the majority of metabolites  
30 including isoleucine (CC 0.33, 95% CI 0.27 to 0.38), total cholesterol (CC 0.30, 95% CI 0.24  
31 to 0.35) and omega 6 fatty acids (CC 0.28, 95% CI 0.23 to 0.34) in parent-child comparisons.

32 **Conclusions:** We describe the serum metabolite profiles from mid-childhood and adulthood  
33 in a population-based sample, together with parent-child concordance. Differences in profiles  
34 by age and sex were observed. These data will be informative for investigation of the  
35 childhood origins of adult non-communicable diseases and for comparative studies in other  
36 populations.

1  
2  
3  
4  
5  
6  
7  
8  
9  
10  
11  
12  
13  
14  
15  
16  
17  
18  
19  
20  
21  
22  
23  
24  
25  
26  
27  
28  
29  
30  
31  
32  
33  
34  
35  
36  
37  
38  
39  
40  
41  
42  
43  
44  
45  
46  
47  
48  
49  
50  
51  
52  
53  
54  
55  
56  
57  
58  
59  
60

2 **Strengths and limitations of this study:**

- 3 • In a large population-based cohort, venous blood was collected for children and their  
4 attending parent on the same day using the same methods
- 5 • Rapidly processed, high quality serum samples with standardised metabolomic data  
6 generated as a single batch
- 7 • Cross-sectional design does not enable longitudinal analysis of specific metabolite  
8 species over short term or longer periods of time
- 9 • Assessment of paternal associations with offspring metabolite measures is limited by  
10 a relatively small sample size compared to mother-child pairs, reducing the precision  
11 of estimates
- 12 • Factors known to influence metabolomic profile (such as body mass index) were not  
13 considered as the aim was to describe the distribution of metabolites in children and  
14 their parents.

## 1 INTRODUCTION

2  
3 Metabolomics involves the quantitative analysis of a large number of metabolites and lipids  
4 involved in a diverse range of biochemical pathways.<sup>1</sup> Genetic/gene expression and  
5 environmental exposures are associated with specific metabolic changes across many tissues  
6 and body fluids.<sup>2 3</sup> As such, metabolomics is recognised as a powerful top-down approach to  
7 understanding genetic and environmental influences on health and disease. Metabolomic  
8 profiling also has considerable potential to identify clinically relevant biomarkers for risk  
9 stratification and disease monitoring.

10 Recent advances in nuclear magnetic resonance (NMR) spectroscopy and mass spectrometry  
11 have enabled the simultaneous quantitative measurement of hundreds of metabolites. These  
12 approaches are sufficiently cost effective and high throughput to be applicable to large cohort  
13 studies. For example, NMR metabolomics of serum from the Cardiovascular Risk in Young  
14 Finns Study identified many biomarkers from multiple metabolic pathways reflective of fatty  
15 liver disease.<sup>4</sup> These were also predictive of risk 10 years prior to diagnosis, indicating that  
16 metabolic disruptions precede overt phenotype. Similar population and disease-specific  
17 studies have identified metabolomic profiles associated with a range of exposures and health  
18 outcomes with potential to reveal clinically important biomarkers and information on disease  
19 mechanisms.<sup>5</sup> In addition, specific serum metabolites can also be considered ‘intermediate  
20 phenotypes’ linking genetic risk with disease outcomes.<sup>6 7</sup>

21 Previous research indicates that some blood metabolites change with age, particularly from  
22 mid to late adulthood.<sup>8 9</sup> However, in adults sex appears to be a major driver of variation in  
23 metabolite profile, potentially interacting with age. For example, the effects of sex appeared  
24 to be greater in younger (age 25-35) than older Japanese adults.<sup>10</sup> A study of 26,000 Northern  
25 European adults identified many sex-specific metabolic species at the population level.<sup>9</sup> In  
26 men, several lipid measures begin to rise at early middle age whereas a similar increase is  
27 only observed in females post menopause. This pattern is consistent for all non-HDL  
28 cholesterol measures – very low density lipoprotein (VLDL), intermediate density lipoprotein  
29 (IDL) and low density lipoprotein (LDL) subclass particle concentrations - as well as for  
30 triglycerides.<sup>9</sup> Physiological states such as pregnancy also have consistent and measurable  
31 influence on serum metabolome.<sup>11</sup> However, it remains unclear how the serum metabolome  
32 differs in adults compared to children and by sex particularly in childhood.

33 Moreover, factors regulating the metabolic trajectory from early life to adulthood, the role of  
34 metabolomic profile in health at the population level and the extent to which blood  
35 metabolomic profiles are concordant for parents and children have not been fully explored.  
36 One small study has reported correlations between parents (n=179) and their offspring



(n=255) for a range of cardiometabolic risk factors including standard lipid profile measured using conventional methods; this proved stronger for total cholesterol and LDL cholesterol than for high density lipoprotein (HDL) cholesterol or triglycerides.<sup>12</sup> Considerable evidence exists that the metabolomic profile is regulated, at least in part, by genetic factors<sup>13 14</sup> and is also influenced by dietary and lifestyle factors. Each of these influences is likely to be shared between parents and their offspring to varying degrees, however, parent-child correlations of metabolites from NMR-based platforms have not been reported previously.

Here, we describe (1) the distribution of NMR-based metabolite measures in a population-based cohort of 11-12 year old children and their parents, differences in metabolite concentrations (2) by age (adults compared to children) and (3) by sex in children and adults; and (4) report sex-specific parent-child concordance.

## METHODS

**Study Design:** Details of the initial Longitudinal Study of Australian Children (LSAC) study design and recruitment are outlined elsewhere.<sup>15 16</sup> The LSAC commenced in 2004, when two cohorts (the 'B' and 'K' cohorts, of which the B cohort only was included in the present study) were recruited who have since been followed biennially. The Child Health CheckPoint comprised a detailed cross-sectional assessment of physical health and biomarkers in a population-based national sample of children (age 11-12 years) and their parents between February 2015 to March 2016. The CheckPoint was nested between waves 6 (2014) and 7 (2016) of the LSAC. Further details regarding the CheckPoint study design and methods are available elsewhere.<sup>17 18</sup>

**Participants:** Of the 8,921 families contacted to be part of the LSAC B cohort 5,107 families (57%) agreed to take part in the first wave of data collection in 2004; 4,484 families were retained for Wave 6 in 2014. During the Wave 6 LSAC home visit, B cohort families were introduced to the upcoming Child Health CheckPoint and asked to consent to their contact details being shared with the CheckPoint team. A total of 3,513 families provided permission to receive an information pack by mail and an information and recruitment phone call regarding the CheckPoint study (78% of Wave 6 cohort, 69% of original cohort). Of the families agreeing to receive information about the CheckPoint study, 1,874 families took part (53% of eligible participants, 42% of Wave 6 cohort and 37% of original cohort).

**Ethics and consent:** The CheckPoint data collection protocol was approved by The Royal Children's Hospital (Melbourne, Australia) Human Research Ethics Committee (33225D) and the Australian Institute of Family Studies Ethics Committee (14-26). The attending parent/caregiver provided written informed consent for themselves and their child to

1 participate in the study, and asked to provide optional consent for the collection and use of  
2 biological samples.

3 **Procedure:** The specialised CheckPoint assessment centre sequentially visited seven  
4 Australian cities and eight regional towns between February 2015 and March 2016.<sup>18</sup> Each  
5 participating child attended the centre with one parent or caregiver (usually the biological  
6 mother) at which both participated in a wide range of measures relevant to non-  
7 communicable disease. Those families who could not attend a centre were offered a home  
8 visit. Participants were included in the current analyses if metabolomic data from CheckPoint  
9 were available (figure 1). Venous blood was not available for home-visit participants, but was  
10 collected at all city and most regional assessment centres. Participant pairs were excluded  
11 from the concordance analyses in this study if the attending parent was not the biological  
12 parent.

13 An experienced phlebotomist collected approximately 28mL of blood from the brachial vein  
14 of the non-dominant arm of semi-reclining, semi-fasted participants (at the time of collection,  
15 participants reported when they last ate or drank). Blood was collected sequentially into four  
16 Becton Dickinson (BD) Vacutainer<sup>®</sup> tubes using a butterfly needle so only a single  
17 venepuncture was required. Order of collection was (i) 2.7mL EDTA, (ii) 9mL EDTA, (iii)  
18 9mL serum, (iv) 7.5mL Lithium Heparin. The latter two tubes were immediately inverted 6  
19 times to ensure mixing with anticoagulant, and all tubes were transferred to the on-site  
20 laboratory. Time of collection was scheduled earlier in the visit for parents than for children.

21 Collection tube barcodes were linked to the participant and samples were immediately  
22 transported to an on-site laboratory where they were processed within two hours. Blood  
23 clotting was allowed at room temperature for at least 30 minutes after collection. The sample  
24 tubes were spun at 550g relative centrifugal force for 10 minutes at room temperature and  
25 distributed into 0.5mL aliquots of plasma, serum, buffy coat (lymphocytes), whole blood  
26 and/or an aliquot tube containing a blood clot (1.0mL FluidX screwcap tubes, Cheshire, UK)  
27 and stored immediately at -80°C (Thermo Fisher Scientific, Waltham, USA). Each FluidX  
28 tube contained a unique 2D barcode linked to the original collection tube and participant. As  
29 each assessment centre closed, samples were shipped on dry ice to the Melbourne Children's  
30 Bioresource Centre for long term storage at -80°C (serum, whole blood, plasma, blood clot)  
31 or vapour phase liquid nitrogen (lymphocytes). At a later date, single 0.5ml serum aliquot  
32 was removed for every CheckPoint participant and the combined aliquots were shipped in a  
33 single batch to Nightingale Health (Helsinki, Finland) on dry ice for NMR metabolomics.

34  
35

## 1 **Measures**

### 2 3 Metabolomic profiling

4 The Nightingale<sup>®</sup> NMR metabolomics platform (Helsinki, Finland) was used to obtain  
5 metabolomics for children and parents using the 2016-version quantification algorithm.  
6 Details of this platform and methodology have been extensively described elsewhere,<sup>6 19</sup> and  
7 epidemiological applications were recently reviewed.<sup>20</sup> Briefly, metabolites were measured  
8 from 0.35mL of serum using a single high-throughput experimental setup for the  
9 simultaneous quantification of routine lipids, lipoprotein subclass distributions, particle size  
10 and composition, fatty acids, and other low-molecular weight metabolites such as amino  
11 acids and glycolysis-related metabolites. This generated data on 228 serum metabolite  
12 measures in absolute concentration units (eg millimoles per liter) and ratios (summarised in  
13 Table 1). Whilst widely used for epidemiological research, the NMR-based quantification has  
14 not been certified for clinical diagnostics. Further analytical validation of the quantification  
15 protocols for the biomarker subset routinely used in clinical settings (eg established  
16 cholesterol measures and creatinine) is expected to lead to recalibration of certain metabolite  
17 concentrations to better match clinical gold standards.<sup>20</sup>

18

1 **Table 1. Summary of biomarkers and derived variables obtained via high-throughput NMR**

| Metabolic group                        | Species and derived measures                                                                                                                                                                                                                                                                                                                                                                                                             |
|----------------------------------------|------------------------------------------------------------------------------------------------------------------------------------------------------------------------------------------------------------------------------------------------------------------------------------------------------------------------------------------------------------------------------------------------------------------------------------------|
| <b>Amino acids</b>                     | Alanine, Glutamine, Glycine, Histidine                                                                                                                                                                                                                                                                                                                                                                                                   |
|                                        | Branched chain: Isoleucine, Leucine, Valine                                                                                                                                                                                                                                                                                                                                                                                              |
|                                        | Aromatic: Phenylalanine, Tyrosine                                                                                                                                                                                                                                                                                                                                                                                                        |
| <b>Cholesterol</b>                     | VLDL, LDL, HDL, HDL2, HDL3, Total, Free, Esterified, Remnant                                                                                                                                                                                                                                                                                                                                                                             |
| <b>Triglycerides and phospholipids</b> | Triglycerides (VLDL, LDL, HDL, total)                                                                                                                                                                                                                                                                                                                                                                                                    |
|                                        | Phosphoglycerides                                                                                                                                                                                                                                                                                                                                                                                                                        |
|                                        | Ratio of triglycerides to phosphoglycerides*                                                                                                                                                                                                                                                                                                                                                                                             |
|                                        | Phosphatidylcholine                                                                                                                                                                                                                                                                                                                                                                                                                      |
|                                        | Sphingomyelins                                                                                                                                                                                                                                                                                                                                                                                                                           |
| Total cholines                         |                                                                                                                                                                                                                                                                                                                                                                                                                                          |
| <b>Apolipoproteins</b>                 | Apolipoprotein A-1 (ApoA-1)                                                                                                                                                                                                                                                                                                                                                                                                              |
|                                        | Apolipoprotein B (Apo B)                                                                                                                                                                                                                                                                                                                                                                                                                 |
|                                        | Ratio of Apolipoprotein B to Apolipoprotein A-1 (ApoB/Apo A-1)*                                                                                                                                                                                                                                                                                                                                                                          |
| <b>Fatty acids (FA)</b>                | Total, Omega-3, Omega-6, Polyunsaturated (PUFA), Saturated (SFA)                                                                                                                                                                                                                                                                                                                                                                         |
|                                        | Monounsaturated (MUFA), Docosahexaenoic acid (DHA), Linoleic (LA)                                                                                                                                                                                                                                                                                                                                                                        |
|                                        | Estimated degree of unsaturation                                                                                                                                                                                                                                                                                                                                                                                                         |
| <b>Fatty acid ratios</b>               | Omega-3/total FA*, Omega-6/total FA*, PUFA/total FA* (all %)                                                                                                                                                                                                                                                                                                                                                                             |
|                                        | SFA/total FA*, MUFA/total FA*, DHA/total FA*, LA/total FA* (all %)                                                                                                                                                                                                                                                                                                                                                                       |
| <b>Lipoprotein subclasses*</b>         | 12 lipid measures in each of 14 subclasses<br>VLDL (XXL, XL, L, M, S, XS), IDL, LDL (L,M,S), HDL (XL, L, M,S):<br>Particle concentration, Total lipids, Esterified cholesterol, Total cholesterol, Phospholipids, Free cholesterol, Triglycerides and Esterified cholesterol/Total lipids (%), Free cholesterol/Total lipids (%), Total cholesterol/Total lipids (%), Triglycerides/Total lipids (%) and Phospholipids/Total lipids (%). |
| <b>Lipoprotein size*</b>               | Mean diameter of VLDL, LDL and HDL particles                                                                                                                                                                                                                                                                                                                                                                                             |
| <b>Ketone bodies</b>                   | Acetate, Acetoacetate, 3-hydroxybutyrate                                                                                                                                                                                                                                                                                                                                                                                                 |
| <b>Glycolysis related</b>              | Glucose, Lactate, Pyruvate, Citrate, Glycerol                                                                                                                                                                                                                                                                                                                                                                                            |
| <b>Fluid balance</b>                   | Creatinine, Albumin                                                                                                                                                                                                                                                                                                                                                                                                                      |
| <b>Inflammation</b>                    | Glycoprotein acetyls (GlycA)                                                                                                                                                                                                                                                                                                                                                                                                             |

2 Information obtained from <https://nightingalehealth.com/science/biomarkers>

3 \* ratio; ApoA-1: Apolipoprotein A-1; Apo B: Apolipoprotein B; DHA: Docosahexaenoic acid; GlycA: Glycoprotein acetyls;  
4 HDL: High-density lipoprotein; IDL: Intermediate density lipoprotein; L: Large; LDL: Low-density lipoprotein; LA:  
5 Linoleic acid; M: Medium; MUFA: Monounsaturated fatty acid; PUFA: Polyunsaturated fatty acid; S: Small; SFA:  
6 Saturated fatty acids; VLDL: Very low density lipoprotein; XL: Very large; XXL: Chylomicrons and extremely large; XS:  
7 Very small.

8  
9 Many of the 228 metabolomics measures correlate substantially both in adults  
10 (supplementary figure 1) and children (supplementary figure 2) and the pattern of correlations  
11 were similar for adults and children. For clarity, we therefore focused on a subset of 74  
12 metabolites in analyses. We eliminated the 5 ratio measures for each of the 14 lipoprotein  
13 subclass particles. In addition, the 7 other measures within each of the lipoproteins (esterified  
14 cholesterol, free cholesterol, total cholesterol, triglycerides, phospholipids, total lipids and  
15 particle concentration) are all highly correlated and therefore we only reported total lipids for  
16 each of the lipoprotein subclass particles.

## 1 Other measures and sample characteristics

2 *Age and sex:* For children, LSAC provided date of birth (DOB) and sex, which was originally  
3 exported from the Medicare Australia database. In parents, DOB and sex was self-reported in  
4 the CheckPoint questionnaire, which was administered on an iPad using the Research  
5 Electronic Data Capture (REDCap) tool.<sup>21</sup> Age in years was calculated as the difference  
6 between date of the CheckPoint assessment and DOB divided by 365.

7 *Disadvantage index:* LSAC provided contact details of families consenting to be contacted  
8 by CheckPoint. The family's residential postcode was confirmed during the CheckPoint  
9 recruitment phone call and updated, if required. The disadvantage index score of postcode  
10 was used to summarise neighbourhood socioeconomic position. Generated by the ABS  
11 from the 2011 national Census, the index numerically summarises the social and economic  
12 conditions of Australian neighbourhoods; national mean 1000, standard deviation 100;  
13 higher scores indicate less disadvantage.<sup>22</sup>

14  
15 *Time of blood collection, processing and fasting time:* Time of blood collection and start of  
16 laboratory processing were recorded. When missing, collection time was estimated using the  
17 midpoint between the time the CheckPoint visit began and time that processing of the sample  
18 commenced. Processing lag time was calculated as the minutes between blood collection and  
19 the processing commencement. Most samples were processed within two hours.

20 Fasting time was calculated as the hours between last eating/drinking to time of blood  
21 collection. The last time of eating/drinking was cross-checked against when the participant  
22 was taking part in other CheckPoint stations (and known not to be eating) as well as sleep and  
23 wake times from accelerometry data (to identify usual activity, and therefore likely eating  
24 patterns) when available. Further details of cleaning processes for the time of last eat/drink  
25 can be found elsewhere.<sup>23</sup>

## 26 **Statistical analysis**

### 27 Sample Characteristics

28  
29 Continuous descriptive variables and metabolite measures were summarised using means and  
30 standard deviations (SD) for children and adults separately, by sex and overall. For skewed  
31 metabolites, geometric means and relative SD were reported. To provide visual comparisons  
32 of distributions of metabolites by age and sex, density plots were used. Population summary  
33 statistics were estimated by applying survey weights and survey procedures that corrected for  
34 sampling, participation and non-response biases, and took into account clustering in the  
35 sampling frame. Standard errors were calculated taking into account the complex design and  
36 weights.<sup>24</sup> More detail on the calculation of weights is provided elsewhere.<sup>25</sup>

1 Differences in metabolite concentration by age (adults compared to children) and by sex  
2 (adults, children)

3 Skewed metabolites (skewness greater or equal to 2) were log-transformed. We used two-  
4 sided paired and unpaired t-tests (as appropriate) to assess differences in mean metabolite  
5 concentrations between adults and children in parent-child dyads, and between males and  
6 females for adults and children separately. P-values were adjusted using Benjamini-  
7 Hochberg (B-H) with a false discovery rate (FDR) of 10% to account for multiple  
8 comparisons.

9 Parent-Child concordance

10 Concordance between parents and children was assessed by 1) Pearson's correlation  
11 coefficients (CC) with 95% confidence intervals, and 2) partial correlation coefficients  
12 (PCC), adjusting for child and parent age, disadvantage index, fasting time, processing lag  
13 time (and for child and parent sex where appropriate). Scatterplots of parent versus child  
14 metabolites (log-transformed where needed as above) were examined to check for outliers  
15 and to ensure assumptions were met.

16 The analyses were repeated using weighted multi-level survey analyses and compared to  
17 unweighted analyses. As there appeared to be no major effect of response patterns on  
18 results we reported results from unweighted analyses. Analyses were undertaken using  
19 Stata version 14.2 (StataCorp, College Station, TX) and R version 3.3.2.<sup>26</sup>

20 **Patient and Public Involvement:** Because LSAC is a population-based longitudinal study,  
21 no patient groups were involved in its design or conduct. To our knowledge, the public was  
22 not involved in the study design, recruitment or conduct of LSAC study or its CheckPoint  
23 module. Parents received a summary health report for their child and themselves at or soon  
24 after the assessment visit. They consented to take part knowing that they would not otherwise  
25 receive individual results about themselves or their child.



## 1 RESULTS

### 3 Sample characteristics

5 The recruitment and retention of participants in the Child Health CheckPoint are described  
6 elsewhere.<sup>18</sup> Of the 1874 families who participated in CheckPoint assessment centres, blood  
7 serum samples of analysable quality from 1180 children and 1325 parents (figure 1) were  
8 sent for NMR quantification of metabolites. The majority of excluded families undertook  
9 home visits or attended a regional centre, where blood samples could not be collected (n=385,  
10 20.5%), while some participants declined a blood sample (children, n=150, 8.0%; adults,  
11 n=108, 5.8%). Few data were lost due to insufficient volume or poor quality samples at the  
12 assessment centre (figure 1). The sample characteristics of parents and children are outlined  
13 in table 2. Summary statistics for our main child and parent metabolite measures are  
14 presented in supplementary table 1. Supplementary figures 3-7 show density plots comparing  
15 the distributions of metabolites for boys, girls and adults.

**Table 2: Sample characteristics; values are weighted mean (standard deviation)**

| Characteristic                 | All         | Male        | Female      |
|--------------------------------|-------------|-------------|-------------|
| <b>Child</b>                   |             |             |             |
| n                              | 1152-1180   | 558-575     | 594-605     |
| Age, years                     | 12.0 (0.4)  | 12.0 (0.4)  | 12.0 (0.4)  |
| BMI, (kg/m <sup>2</sup> )      | 19.4 (3.5)  | 19.2 (3.4)  | 19.6 (3.7)  |
| BMI z-score                    | 0.38 (1.0)  | 0.40 (1.0)  | 0.37 (1.0)  |
| Disadvantage Index             | 1012 (63)   | 1011 (65)   | 1014 (61)   |
| Fasting time (hours)           | 4.2 (1.2)   | 4.3 (1.3)   | 4.2 (1.1)   |
| Time of day - blood collection | 14.16 (2.0) | 14.12 (2.0) | 14.20 (2.1) |
| Processing lag time (hours)    | 1.16 (0.5)  | 1.18 (0.5)  | 1.14 (0.5)  |
| <b>Parent</b>                  |             |             |             |
| n                              | 1272-1325   | 174-177     | 1098-1148   |
| Age, years                     | 43.9 (5.6)  | 46.9 (6.9)  | 43.4 (5.2)  |
| BMI, (kg/m <sup>2</sup> )      | 28.4 (6.4)  | 28.9 (4.7)  | 28.4 (6.6)  |
| Fasting time (hours)           | 3.3 (1.6)   | 3.6 (2.0)   | 3.2 (1.5)   |
| Time of day - blood collection | 13.10 (2.0) | 13.18 (2.1) | 13.09 (2.0) |
| Processing lag time (hours)    | 1.26 (0.5)  | 1.31 (0.5)  | 1.26 (0.5)  |

Disadvantage Index: Index of Relative Socioeconomic Disadvantage; n: number of participants in cohort with this measure.

### Differences in metabolite levels - adults compared to children

Figure 2 shows mean differences in metabolite levels for adults relative to children in standard deviation (SD) units. Most concentrations were higher in adults than children. Values that were similar in adults and children included total lipids in very large HDL lipoprotein subclass particles, acetoacetate, tyrosine and glucose. Levels in children were higher than those of adults for the majority of glycolysis related measures (lactate, pyruvate, citrate and glycerol), the ketone body 3-hydroxybutrate, the amino acid glutamine, many fatty acid ratios and all lipoprotein particle sizes. Supplementary table 2 lists the corresponding estimates in absolute concentration units.

### Sex differences in metabolite levels in children and adults

Figure 3 shows differences in mean metabolite levels by sex for children and adults separately in SD units, with estimates in absolute concentration units listed in supplementary table 3 and 4.

1  
2  
3 1 In general, sex differences were more pronounced in adulthood, resulting in distinct overall  
4 2 patterns for children and adults. Children generally showed smaller differences by sex than  
5 3 adults. Of note, sex differences for apolipoproteins and fatty acid measures showed different  
6 4 patterns in children compared to adults.

7  
8  
9  
10 5 Girls had lower levels of apolipoprotein-A-1 (ApoA-1) and higher ApoB than boys. In adults,  
11 6 the opposite pattern was observed with females having higher ApoA-1 and lower ApoB than  
12 7 males. In children, some fatty acid concentrations were higher in girls than boys. In contrast,  
13 8 many adult fatty acid measures were higher in males. There was no evidence of a difference  
14 9 in the level of inflammation (GlycA) by sex in children, while in adults, GlycA levels tended  
15 10 to be higher in males than females.

16  
17  
18  
19  
20 11 For some metabolites, sex differences in children mirrored (but were smaller in magnitude  
21 12 than) those of adults, particularly for the ketone body acetate and some key amino acids. At  
22 13 both ages, the amino acid glycine was higher in females but the branched-chain amino acids  
23 14 leucine and valine tended to be higher in males.

### 24 15 **Parent-child concordance**

25  
26  
27  
28  
29 16 Figure 4 shows the correlations between metabolite measures for all children with all parents,  
30 17 and for boys and girls with mothers (but not with the 177 fathers, given the small numbers).  
31 18 The corresponding correlation coefficients and partial correlation coefficients are listed in  
32 19 supplementary tables 5 and 6.

33  
34  
35  
36 20 Correlations for all parents and all children showed similar patterns to that observed for  
37 21 mother and child by sex. While there was little suggestion of substantial correlation within  
38 22 parent-child dyads for some metabolites (eg glucose, acetate) a positive correlation was found  
39 23 for many metabolite measures irrespective of child sex. For example, positive correlations  
40 24 were observed for isoleucine (CC 0.33, 95% CI 0.27 to 0.38), total serum cholesterol (CC  
41 25 0.30, 95% CI 0.24 to 0.35) and omega 6 fatty acids (CC 0.28, 95% CI 0.23 to 0.34) in parent-  
42 26 child comparisons. Additional adjustment for factors that potentially influence metabolite  
43 27 levels (age, socioeconomic status, fasting time and processing lag time) had little effect on  
44 28 the degree of correlation in any comparison (supplementary tables 5 and 6).

45  
46  
47  
48  
49  
50  
51 29

## 1 DISCUSSION

### 2 Principal findings

3 Here we present age and sex differences, describing the distribution of detailed/NMR-based  
4 metabolite measures in Australian 11-12 year old children and their parents, and demonstrate  
5 that many metabolite measures have moderate parent-child concordance and in general there  
6 is a high level of agreement in the magnitude of concordance across metabolites. In accord  
7 with previous studies, we observed major differences in metabolite levels between childhood  
8 and adulthood and also differences by sex in both childhood and adulthood. We also  
9 observed variability in the magnitude of differences by sex for several metabolites in  
10 childhood compared to adulthood and identified a complex interplay of correlations of  
11 specific metabolites between parents and their children according to parent-child sex  
12 relationships.

### 13 Strengths and weaknesses

14 This is the first major cohort study to report both sex- and cross-generational differences in  
15 metabolomic concentrations in mid-childhood to adulthood utilising the NMR platform.  
16 Further strengths include the large number of parent-child dyads representing a wide range of  
17 parent ages, the national population-based sample and the state-of-the-art measurements.  
18 Replication studies exploring sex differences at earlier and later stages of childhood and  
19 adolescence would strengthen findings.

20 An important limitation is that paternal factors were not fully represented, as most parental  
21 samples were from mothers (a well-documented problem in longitudinal cohort studies). This  
22 also limited sex-specific parental contribution analysis; further studies including more fathers  
23 are warranted. Additional limitations are that, without samples from both parents for each  
24 child, we could not estimate heritability, and our results might not apply to mid-life adults  
25 who are not parents (although we see no good reason why these would differ greatly). The  
26 original uptake of just over 50% and subsequent attrition within LSAC and then the  
27 CheckPoint has led to a relatively advantaged sample, but nonetheless participants varied  
28 widely on key potential confounders (eg disadvantage, age) and this was at least partly offset  
29 by application or consideration of survey weights. Given the large number of metabolites and  
30 modest sample size, considerable uncertainty remains in any ranking of the various effects  
31 across metabolites. In addition, given the descriptive aims of the paper, additional factors and  
32 potential confounders not considered could explain some of the results observed.

## 1 **Meaning and implications for clinicians and policymakers**

2 Overall, we found a difference in metabolite profile between children and their parents. This  
3 was apparent for specific metabolite measures (such as some amino acids) as well as the  
4 distribution of metabolites (such as lipid composition of lipoproteins of different density).  
5 Some measures were higher in adults, some similar, while a minority were lower. Previous  
6 studies, largely in adults, have identified a range of specific metabolite changes with age,  
7 particularly from mid to late adulthood.<sup>27</sup> This includes a general decrease in several amino  
8 acid species, which contrasts with our findings from childhood to mid adulthood.<sup>8</sup> Only the  
9 amino acid glutamine showed this pattern in our dataset.

10 Differences in children by sex ( $\pm 0.2$  SD) were generally much smaller than in adults ( $\pm 0.8$   
11 SD). Large metabolomic studies using alternative platforms have previously reported  
12 reproducible, sex-specific signatures in circulating metabolite profile in adults.<sup>28-29</sup> This  
13 includes differences in amino acid and lipid serum concentrations, potentially influenced by  
14 sex-specific effects of genetic polymorphisms on metabolite levels.<sup>29-30</sup> As in our study, most  
15 amino acids have usually been reported to be higher in men than women.<sup>29-31</sup> For example, in a  
16 recent study of 507 metabolic markers in 1756 individuals (903 female and 853 male aged  
17  $\sim 60$  years), one third of metabolites showed significant sexual dimorphism. These were  
18 predominantly related to pathways of steroid metabolism, fatty acids, other lipids, and a large  
19 proportion of amino acids.<sup>31</sup> Of particular note, branched chain amino acids (BCAAs) and  
20 their related metabolic products were amongst the most differentially represented, with much  
21 higher isoleucine, leucine and valine in males. A similar finding of higher leucine and valine  
22 was also noted in the Cooperative Health Research in the Region of Augsburg (KORA)  
23 follow-ups 3 (F3) and 4 (F4) analysis of  $>3000$  adults,<sup>29</sup> consistent with our observations in  
24 adulthood.

25 In children, we found that sex differences for leucine and valine were smaller but in the same  
26 direction as adults. Several lines of evidence implicate BCAA metabolism with metabolic  
27 risk in humans. For example, three candidate genes for obesity and/or type 2 diabetes  
28 mellitus (T2DM) are involved in the BCAA metabolic pathway.<sup>32</sup> In a recent large meta-  
29 analysis of metabolomics in diabetes, a  $>30\%$  higher risk of type 2 diabetes was found per  
30 SD increase in isoleucine, leucine, valine or tyrosine, whereas glycine and glutamine were  
31 inversely associated with risk.<sup>32</sup> Several clinical studies have also reported that BCAAs  
32 positively correlate with insulin resistance, homeostatic model assessment (HOMA) index  
33 and levels of haemoglobin A1c (HbA1c), while longitudinal studies have reported that

1 increased blood BCAAs are predictive of future insulin resistance and type 2 diabetes  
2 (T2D).<sup>33</sup> It is intriguing to speculate that the higher BCAA in males from early life could  
3 contribute to the well-described increasing prevalence of T2D in men. Levels of BCAA are  
4 elevated in females with Polycystic Ovary Syndrome (PCOS), potentially contributing to the  
5 associated insulin resistance.<sup>34</sup> However, it remains unclear whether BCAA are on the causal  
6 pathway to T2D or result from adverse metabolic health. Our demonstration that the sex  
7 differences in BCAA possibly arise early in life offers potential to track their association with  
8 sex-specific measures of metabolic health from an early age to help clarify where they lie on  
9 the causal pathway.

10 In accord with previous adult studies<sup>29</sup>, we found higher levels of glycine in mothers than  
11 fathers, and (less markedly) in girls than boys. Interestingly, recent metabolomics and genetic  
12 analyses of ~10,000 adults with cardiovascular disease (CVD), with replication in >53,000  
13 subjects, identified a genetic variant in carbamoyl-phosphate synthase 1 (*CPS1*) (linked to  
14 plasma glycine levels) to be strongly associated with a reduced risk of CVD in women  
15 ( $p=6.3 \times 10^{-5}$ ) but not men ( $p=0.95$ ), suggesting a direct link between glycine levels and CVD  
16 risk, although whether this is a causal association remains unclear.<sup>35</sup> It will be interesting in  
17 the future to explore the link between variants in *CPS1* and circulating glycine levels from  
18 early life to adulthood in relation to markers of cardiovascular health in females.

19 The small sex-differences of HDL cholesterol and ApoA-1 in children compared to adults is  
20 consistent with modest differences in children, whereas substantial differences in adulthood  
21 have previously been reported.<sup>36</sup> ApoA-1 was more abundant in boys, while ApoB was  
22 higher in girls, leading to a higher ApoB/ApoA-1 ratio in girls. The opposite pattern was  
23 found in our limited sample of fathers relative to mothers. These data are surprising and  
24 differ from a similarly sized study of slightly older European adolescent children (mean age  
25 15 years) that found higher ApoA-1 and ApoB in girls relative to boys.<sup>37</sup> Interestingly, a  
26 higher ApoB/ApoA-1 ratio has been strongly linked to increased coronary risk in adults,<sup>38-40</sup>  
27 suggesting that sex differences may alter with increasing age, in keeping with the increased  
28 CVD risk in adult males. ApoA-1 is the main protein component of HDL cholesterol<sup>41</sup> thus  
29 the differences in trajectories in lipids and HDL cholesterol for boys and girls across  
30 childhood that have been reported<sup>42 43</sup> could partially explain this observation.

31 These are the first data on the mother-child or parent-child correlations of NMR metabolites.  
32 Smaller studies have reported positive correlations between parents and children for a limited  
33 range of cardiometabolic risk factors including total cholesterol, LDL cholesterol, HDL



1 cholesterol and triglycerides measured using conventional methods. We found positive  
2 correlations between parents and children for the same lipid measures (although measured  
3 using NMR) consistent with previously reported findings. One study reported a positive  
4 association between the serum lipid levels of 4 year old children (n=127) and their parents  
5 (122 mothers and 118 fathers)<sup>44</sup> while another study of children aged 6-18 (n=255) and their  
6 parents (n=179) found that the age of the child influenced the degree of correlation of several  
7 lipid measures, with older (10-18 years) children more similar to their parents in terms of  
8 triglyceride levels than younger individuals (6-9 years).<sup>12</sup>

### 9 **Unanswered questions and future research**

10 The temporal and sex specific dynamism of the metabolomics data we describe here offer  
11 considerable opportunities for identification of biomarkers of risk for a range of non-  
12 communicable diseases early in life, to inform targeted interventions and monitor their  
13 efficacy. Combining metabolomics with other 'omics data (such as genetics), as is  
14 increasingly reported from large adult studies, offers considerable promise in understanding  
15 the causal pathways that link early life exposures, genetics and intermediate phenotypes with  
16 later onset chronic disease, and in identifying clinically relevant biomarkers.

17 In conclusion, we describe the metabolite profile from mid-childhood and adulthood in a  
18 population-based sample, together with parent-child concordance and differences by sex in  
19 children and adults. In this descriptive paper, distinct differences in profiles were observed by  
20 age and sex, as well as considerable evidence of correlation between parent and child  
21 measures. These data will be informative for investigation of the childhood origins of adult  
22 non-communicable diseases and for comparative studies across populations.

## 1 **ACKNOWLEDGEMENTS**

2 This paper uses unit record data from *Growing Up in Australia*, the Longitudinal Study of  
3 Australian Children. The study is conducted in partnership between the Department of Social  
4 Services (DSS), the Australian Institute of Family Studies (AIFS) and the Australian Bureau  
5 of Statistics (ABS). The findings and views reported in this paper are those of the author and  
6 should not be attributed to DSS, AIFS or the ABS.

7  
8 REDCap (Research Electronic Data Capture) tools were used in this study. More  
9 information about this software can be found at: [www.project-redcap.org](http://www.project-redcap.org).

10 We thank the LSAC and CheckPoint study participants, staff and students for their  
11 contributions.

## 12 **COMPETING INTERESTS**

13  
14 All authors have completed the ICMJE uniform disclosure form at  
15 [www.icmje.org/doi\\_disclosure.pdf](http://www.icmje.org/doi_disclosure.pdf) and declare financial support as described in the funding  
16 section. MW received support from Sandoz to present at a symposium outside the submitted  
17 work. PW is employee and shareholder of Nightingale Health Ltd, a company offering  
18 NMR-based metabolic profiling.

## 19 **FUNDING**

20 This work was supported by the National Health and Medical Research Council (NHMRC)  
21 of Australia (Project Grants 1041352, 1109355), The Royal Children's Hospital Foundation  
22 (2014-241), the Murdoch Children's Research Institute, The University of Melbourne, the  
23 National Heart Foundation of Australia (100660) and the Financial Markets Foundation for  
24 Children (2014-055, 2016-310). NHMRC Senior Research Fellowships supported MW  
25 (1046518), DB (1064629) and RS (1045161). MW was supported by Cure Kids New Zealand  
26 and DB holds an Honorary Future Leader Fellowship of the National Heart Foundation of  
27 Australia (100369). PW is supported by Academy of Finland (grant numbers 312476 and  
28 312477). The MCRI administered the research grants for the study and provided  
29 infrastructural support (IT and biospecimen management) to its staff and the study, but  
30 played no role in the conduct or analysis of the trial. DSS played a role in study design;  
31 however, no other funding bodies had a role in the study design and conduct; data collection,  
32 management, analysis, and interpretation; preparation, review, or approval of the manuscript;

1 and decision to submit the manuscript for publication. Research at the MCRI is supported by  
2 the Victorian Government's Operational Infrastructure Support Program.

3

#### 4 **CONTRIBUTIONS**

5  
6 DB, RS and JC conceptualised and developed the Metabolomics Checkpoint study. SE and  
7 JC undertook all aspects of data analysis. SAC coordinated the acquisition of metabolomics  
8 data and provided critical review of this manuscript. MW, the Principal Investigator of the  
9 Child Health CheckPoint, planned the analyses and provided critical review of this  
10 manuscript. SE and RS drafted the manuscript. PW, MJ, TD, KL, JC, DB provided critical  
11 expert advice and critical review of this manuscript.

#### 12 **DATA SHARING STATEMENT**

13  
14 Dataset and technical documents available from *Growing Up in Australia: The Longitudinal*  
15 *Study of Australian Children* via low-cost license for bona fide researchers. More information  
16 is available at [www.growingupinaustralia.gov.au](http://www.growingupinaustralia.gov.au)

17

18

## 1 **FIGURE CAPTIONS AND FOOTNOTES**

### 2 **Figure 1: Participant flow chart.**

3 n=number of families, c=number of children, p=number of attending adults,

4 MAC=Main assessment centre, mAC=Mini assessment centre, HV=Home visit assessment,

5 LSAC=Longitudinal Study of Australian Children

6 \*Unable to analyse due to insufficient volume or poor quality sample

7 ^Data from 6 non-biological child-parent pairs excluded from concordance analyses

### 8 **Figure 2: Differences in metabolite levels between children and adults.**

9 Association measures are SD difference in metabolite concentration for adults compared to  
10 children. Error bars represent 95% confidence intervals. Significant associations after p-  
11 values adjusted for multiple testing using Benjamini-Hochberg procedure are shown in bold  
12 (FDR=0.10). Association measures in absolute concentration units, 95% confidence intervals  
13 and associated p-values are listed in supplementary table 2. HDL: High-density lipoprotein;  
14 IDL: Intermediate density lipoprotein; LDL: Low-density lipoprotein; VLDL: Very low  
15 density lipoprotein.

### 16 **Figure 3: Sex differences in metabolite levels in childhood and adulthood.**

17 Association measures are SD difference in metabolite concentration for females compared to  
18 males in children (A) and adults (B). Error bars represent 95% confidence intervals.  
19 Significant associations after p-values adjusted for multiple testing using Benjamini-  
20 Hochberg procedure are shown in bold (FDR=0.10). Association measures in absolute  
21 concentration units, 95% confidence intervals and associated p-values are listed in  
22 supplementary table 3 and 4. HDL: High-density lipoprotein; IDL: Intermediate density  
23 lipoprotein; LDL: Low-density lipoprotein; VLDL: Very low density lipoprotein.

### 24 **Figure 4: Parent:child correlation for metabolite measures.**

25 Pearson's correlation coefficients for all children with all parents (A); and for boys (blue)  
26 with mothers and for girls (red) with mothers (B). Error bars represent 95% confidence  
27 intervals. Correlation coefficients with associated 95% confidence intervals are listed in

1  
2  
3  
4  
5  
6  
7  
8  
9  
10  
11  
12  
13  
14  
15  
16  
17  
18  
19  
20  
21  
22  
23  
24  
25  
26  
27  
28  
29  
30  
31  
32  
33  
34  
35  
36  
37  
38  
39  
40  
41  
42  
43  
44  
45  
46  
47  
48  
49  
50  
51  
52  
53  
54  
55  
56  
57  
58  
59  
60

1 supplementary table 5 and 6. HDL: High-density lipoprotein; IDL: Intermediate density  
2 lipoprotein; LDL: Low-density lipoprotein; VLDL: Very low density lipoprotein.  
3

For peer review only

## **SUPPLEMENTARY DOCUMENTS**

### **Supplementary figure 1: Correlation of NMR measures in children.**

Heatmap showing the correlation between metabolite measures in children. The correlations shown are Spearman's correlation coefficients with blue cells representing negative correlations and red cells representing positive correlations.

### **Supplementary figure 2: Correlation of NMR metabolite measures in parents.**

Heatmap showing the correlation between metabolite measures in parents. The correlations shown are Spearman's correlation coefficients with blue cells representing negative correlations and red cells representing positive correlations.

### **Supplementary figure 3: Density plots for cholesterol and apolipoprotein measures.**

Boys (blue), girls (red), and all parents (thin dotted black line) plotted on the same graph for each cholesterol and apolipoprotein measure.

### **Supplementary figure 4: Density plots for fatty acid and fatty acid ratio measures.**

Boys (blue), girls (red), and all parents (thin dotted black line) plotted on the same graph for each fatty acid and fatty acid ratio measure.

### **Supplementary figure 5: Density plots for total lipids in the 14 lipoprotein subclass particles.**

Boys (blue), girls (red), and all parents (thin dotted black line) plotted on the same graph for total lipids within each of the 14 lipoprotein subclass particles.

### **Supplementary figure 6: Density plots for lipoprotein particle size and triglyceride measures.**

Boys (blue), girls (red), and all parents (thin dotted black line) plotted on the same graph for lipoprotein particle sizes and triglyceride measures.

### **Supplementary figure 7: Density plots for glycolysis related, amino acid, ketone body, fluid balance and inflammation measures.**

Boys (blue), girls (red), and all parents (thin dotted black line) plotted on the same graph for glycolysis related, amino acid, ketone body, fluid balance and inflammation measures.

### **Supplementary table 1: Weighted mean (SD) of metabolite measures in children and parents.**

### **Supplementary table 2: Mean difference in metabolite levels in adults compared to children in absolute concentration units.**



1  
2  
3  
4  
5  
6  
7  
8  
9  
10  
11  
12  
13  
14  
15  
16  
17  
18  
19  
20  
21  
22  
23  
24  
25  
26  
27  
28  
29  
30  
31  
32  
33  
34  
35  
36  
37  
38  
39  
40  
41  
42  
43  
44  
45  
46  
47  
48  
49  
50  
51  
52  
53  
54  
55  
56  
57  
58  
59  
60

1 **Supplementary table 3: Differences in mean metabolite levels in girls compared to boys**  
2 **in absolute concentration units.**

4 **Supplementary table 4: Differences in mean metabolite levels in female compared to**  
5 **male adults in absolute concentration units.**

7 **Supplementary table 5: Mother-child concordance; correlations and partial correlations**  
8 **between mothers and their sons, daughters and all children.**

10 **Supplementary table 6: Parent-child concordance; correlation and partial correlations**  
11 **between all parents and their sons, daughters and all children.**

For peer review only

## 1 REFERENCES

1. Nicholson JK, Lindon JC, Holmes E. 'Metabonomics': understanding the metabolic responses of living systems to pathophysiological stimuli via multivariate statistical analysis of biological NMR spectroscopic data. *Xenobiotica* 1999;29(11):1181-9. doi: 10.1080/004982599238047
2. Nath AP, Ritchie SC, Byars SG, et al. An interaction map of circulating metabolites, immune gene networks, and their genetic regulation. *Genome biology* 2017;18(1):146. doi: 10.1186/s13059-017-1279-y
3. Shah SH, Newgard CB. Integrated metabolomics and genomics: systems approaches to biomarkers and mechanisms of cardiovascular disease. *Circ Cardiovasc Genet* 2015;8(2):410-9. doi: 10.1161/CIRCGENETICS.114.000223
4. Kaikkonen JE, Wurtz P, Suomela E, et al. Metabolic profiling of fatty liver in young and middle-aged adults: Cross-sectional and prospective analyses of the Young Finns Study. *Hepatology* 2017;65(2):491-500. doi: 10.1002/hep.28899
5. Johnson CH, Ivanisevic J, Siuzdak G. Metabolomics: beyond biomarkers and towards mechanisms. *Nat Rev Mol Cell Biol* 2016;17(7):451-9. doi: 10.1038/nrm.2016.25
6. Kettunen J, Tukiainen T, Sarin AP, et al. Genome-wide association study identifies multiple loci influencing human serum metabolite levels. *Nat Genet* 2012;44(3):269-76. doi: 10.1038/ng.1073
7. Suhre K, Gieger C. Genetic variation in metabolic phenotypes: study designs and applications. *Nat Rev Genet* 2012;13(11):759-69. doi: 10.1038/nrg3314
8. Yu Z, Zhai G, Singmann P, et al. Human serum metabolic profiles are age dependent. *Aging Cell* 2012;11(6):960-7. doi: 10.1111/j.1474-9726.2012.00865.x
9. Auro K, Joensuu A, Fischer K, et al. A metabolic view on menopause and ageing. *Nat Commun* 2014;5:4708. doi: 10.1038/ncomms5708
10. Saito K, Maekawa K, Kinchen JM, et al. Gender- and Age-Associated Differences in Serum Metabolite Profiles among Japanese Populations. *Biol Pharm Bull* 2016;39(7):1179-86. doi: 10.1248/bpb.b16-00226
11. Wang Q, Wurtz P, Auro K, et al. Metabolic profiling of pregnancy: cross-sectional and longitudinal evidence. *BMC Med* 2016;14(1):205. doi: 10.1186/s12916-016-0733-0
12. Halvorsen T, Moran A, Jacobs DR, Jr., et al. Relation of Cardiometabolic Risk Factors between Parents and Children. *J Pediatr* 2015;167(5):1049-56 e2. doi: 10.1016/j.jpeds.2015.07.053
13. Rueedi R, Ledda M, Nicholls AW, et al. Genome-Wide Association Study of Metabolic Traits Reveals Novel Gene-Metabolite-Disease Links. *PLOS Genetics* 2014;10(2):e1004132. doi: 10.1371/journal.pgen.1004132
14. Kettunen J, Demirkan A, Würtz P, et al. Genome-wide study for circulating metabolites identifies 62 loci and reveals novel systemic effects of LPA. *Nature Communications* 2016;7:11122. doi: 10.1038/ncomms11122  
<https://www.nature.com/articles/ncomms11122#supplementary-information>
15. Edwards B. Growing Up in Australia: The Longitudinal Study of Australian Children: Entering adolescence and becoming a young adult. *Family Matters* 2014(95):5-14.
16. Sanson A, Johnstone R. The LSAC Research Consortium & FaCS LSAC Project Team. Growing Up in Australia takes its first steps. *Family Matters* 2004;67:46-53.
17. Wake M, Clifford SA, York E, et al. Introducing Growing Up in Australia's Child Health CheckPoint. *Family Matters* 2014;94:15-23.

18. Clifford SA, Davies S, Wake M. Child Health CheckPoint: Cohort summary and methodology of a physical health and biospecimen module for the Longitudinal Study of Australian Children. Submitted to BMJ Open October 2017.
19. Soininen P, Kangas AJ, Wurtz P, et al. High-throughput serum NMR metabolomics for cost-effective holistic studies on systemic metabolism. *Analyst* 2009;134(9):1781-5. doi: 10.1039/b910205a
20. Wurtz P, Kangas AJ, Soininen P, et al. Quantitative Serum NMR Metabolomics in Large-Scale Epidemiology: A Primer on -Omic Technology. *Am J Epidemiol* 2017 [published Online First: 10 May 2017]
21. Harris PA, Taylor R, Thielke R, et al. Research electronic data capture (REDCap)--a metadata-driven methodology and workflow process for providing translational research informatics support. *J Biomed Inform* 2009;42(2):377-81. doi: 10.1016/j.jbi.2008.08.010 [published Online First: 2008/10/22]
22. Australian Bureau of S. Census of population and housing: Socio-Economic Indexes for Areas (SEIFA) 2011. Cat. no. 2033.0.55.001, 2011.
23. Davies S, Clifford S, Gillespie A, et al. LSAC's Child Health CheckPoint Data Issues Paper 2018. *Melbourne: Murdoch Children's Research Institute* 2018 doi: 10.25374/MCRI.5821230.
24. Heeringa SG, West BT, Berglund PA. Applied survey data analysis. Boca Raton.: CRC press 2010.
25. Ellul S, Hiscock R, Mensah FK, et al. Longitudinal Study of Australian Children's Child Health CheckPoint Technical Paper 1: Weighting and Non-Response. *Melbourne: Murdoch Children's Research Institute* 2018 doi: <https://doi.org/10.25374/MCRI.5687593>
26. R: A language and environment for statistical computing [program]. Vienna, Austria: R Foundation for Statistical Computing, 2018.
27. Menni C, Kastenmüller G, Petersen AK, et al. Metabolomic markers reveal novel pathways of ageing and early development in human populations. *International Journal of Epidemiology* 2013;42(4):1111-19. doi: 10.1093/ije/dyt094
28. Dunn WB, Lin W, Broadhurst D, et al. Molecular phenotyping of a UK population: defining the human serum metabolome. *Metabolomics* 2015;11:9-26. doi: 10.1007/s11306-014-0707-1
29. Mittelstrass K, Ried JS, Yu Z, et al. Discovery of sexual dimorphisms in metabolic and genetic biomarkers. *PLoS Genet* 2011;7(8):e1002215. doi: 10.1371/journal.pgen.1002215
30. Kolz M, Johnson T, Sanna S, et al. Meta-analysis of 28,141 individuals identifies common variants within five new loci that influence uric acid concentrations. *PLoS Genet* 2009;5(6):e1000504. doi: 10.1371/journal.pgen.1000504
31. Krumsiek J, Mittelstrass K, Do KT, et al. Gender-specific pathway differences in the human serum metabolome. *Metabolomics* 2015;11(6):1815-33. doi: 10.1007/s11306-015-0829-0
32. Guasch-Ferré M, Hruby A, Toledo E, et al. Metabolomics in Prediabetes and Diabetes: A Systematic Review and Meta-analysis. *Diabetes Care* 2016;39(5):833-46. doi: 10.2337/dc15-2251
33. Lynch CJ, Adams SH. Branched-chain amino acids in metabolic signalling and insulin resistance. *Nature reviews Endocrinology* 2014;10(12):723-36. doi: 10.1038/nrendo.2014.171
34. Chang AY, Lalia AZ, Jenkins GD, et al. Combining a nontargeted and targeted metabolomics approach to identify metabolic pathways significantly altered in

- 1 polycystic ovary syndrome. *Metabolism* 2017;71(Supplement C):52-63. doi:  
2 <https://doi.org/10.1016/j.metabol.2017.03.002>
- 3 35. Hartiala JA, Wilson Tang WH, Wang Z, et al. Genome-wide association study and  
4 targeted metabolomics identifies sex-specific association of CPS1 with coronary  
5 artery disease. *Nature Communications* 2016;7:10558. doi: 10.1038/ncomms10558
- 6 36. Davis CE, Williams DH, Oganov RG, et al. Sex Difference in High Density Lipoprotein  
7 Cholesterol in Six Countries. *American Journal of Epidemiology* 1996;143(11):1100-  
8 06. doi: 10.1093/oxfordjournals.aje.a008686
- 9 37. Spinneker A, Egert S, Gonzalez-Gross M, et al. Lipid, lipoprotein and apolipoprotein  
10 profiles in European adolescents and its associations with gender, biological maturity  
11 and body fat--the HELENA Study. *Eur J Clin Nutr* 2012;66(6):727-35. doi:  
12 10.1038/ejcn.2011.222
- 13 38. Walldius G, Jungner I, Aastveit AH, et al. The apoB/apoA-I ratio is better than the  
14 cholesterol ratios to estimate the balance between plasma proatherogenic and  
15 antiatherogenic lipoproteins and to predict coronary risk. *Clin Chem Lab Med*  
16 2004;42(12):1355-63. doi: 10.1515/CCLM.2004.254
- 17 39. Walldius G, Jungner I. The apoB/apoA-I ratio: a strong, new risk factor for  
18 cardiovascular disease and a target for lipid-lowering therapy--a review of the  
19 evidence. *J Intern Med* 2006;259(5):493-519. doi: 10.1111/j.1365-2796.2006.01643.x
- 20 40. Mozaffarian D, Benjamin EJ, Go AS, et al. Heart disease and stroke statistics--2015  
21 update: a report from the American Heart Association. *Circulation* 2015;131(4):e29-  
22 322. doi: 10.1161/CIR.0000000000000152
- 23 41. Upadhyay RK. Emerging Risk Biomarkers in Cardiovascular Diseases and Disorders.  
24 *Journal of Lipids* 2015;2015:971453. doi: 10.1155/2015/971453
- 25 42. Hardy R, Lawlor DA, Kuh D. A life course approach to cardiovascular aging. *Future*  
26 *cardiology* 2015;11(1):101-13. doi: 10.2217/fca.14.67
- 27 43. Jolliffe CJ, Janssen I. Distribution of Lipoproteins by Age and Gender in Adolescents.  
28 *Circulation* 2006;114(10):1056.
- 29 44. Ohlund I, Hernell O, Hornell A, et al. Serum lipid and apolipoprotein levels in 4-year-old  
30 children are associated with parental levels and track over time. *Eur J Clin Nutr*  
31 2011;65(4):463-69.  
32



Figure 1: Participant flow chart.

n=number of families, c=number of children, p=number of attending adults,  
MAC=Main assessment centre, mAC=Mini assessment centre, HV=Home visit assessment,  
LSAC=Longitudinal Study of Australian Children

\*Unable to analyse due to insufficient volume or poor quality sample

^Data from 6 non-biological child-parent pairs excluded from concordance analyses

76x114mm (600 x 600 DPI)



Figure 2: Differences in metabolite levels between children and adults.

Association measures are SD difference in metabolite concentration for adults compared to children. Error bars represent 95% confidence intervals. Significant associations after p-values adjusted for multiple testing using Benjamini-Hochberg procedure are shown in bold (FDR=0.10). Association measures in absolute concentration units, 95% confidence intervals and associated p-values are listed in supplementary table 2. HDL: High-density lipoprotein; IDL: Intermediate density lipoprotein; LDL: Low-density lipoprotein; VLDL: Very low density lipoprotein.

254x338mm (300 x 300 DPI)





Figure 3: Sex-specific differences in metabolite levels in childhood and adulthood.

Association measures are SD difference in metabolite concentration for females compared to males in children (A) and adults (B). Error bars represent 95% confidence intervals. Significant associations after p-values adjusted for multiple testing using Benjamini-Hochberg procedure are shown in bold (FDR=0.10). Association measures in absolute concentration units, 95% confidence intervals and associated p-values are listed in supplementary table 3 and 4. HDL: High-density lipoprotein; IDL: Intermediate density lipoprotein; LDL: Low-density lipoprotein; VLDL: Very low density lipoprotein.

169x169mm (300 x 300 DPI)



Figure 4: Parent:child correlation for metabolite measures. Pearson's correlation coefficients for all children with all parents (A); and for boys (blue) with mothers and for girls (red) with mothers (B). Error bars represent 95% confidence intervals. Correlation coefficients with associated 95% confidence intervals are listed in supplementary table 5 and 6. HDL: High-density lipoprotein; IDL: Intermediate density lipoprotein; LDL: Low-density lipoprotein; VLDL: Very low density lipoprotein.

169x169mm (300 x 300 DPI)

Supplementary table 1: Weighted mean (SD)\* of metabolite measures in children and parents.

| Metabolic subgroup                                        | Children |        |       |        |        |       |      |        |       | Adults |        |       |        |        |       |      |        |       |
|-----------------------------------------------------------|----------|--------|-------|--------|--------|-------|------|--------|-------|--------|--------|-------|--------|--------|-------|------|--------|-------|
|                                                           | Male     |        |       | Female |        |       | All  |        |       | Male   |        |       | Female |        |       | All  |        |       |
|                                                           | n        | Mean   | SD    | n      | Mean   | SD    | n    | Mean   | SD    | n      | Mean   | SD    | n      | Mean   | SD    | n    | Mean   | SD    |
| <b>Lipoprotein subclass lipids</b>                        |          |        |       |        |        |       |      |        |       |        |        |       |        |        |       |      |        |       |
| Total lipids in chylomicrons & ex.large VLDL (mmol/L)*    | 575      | 0.005  | 4.826 | 605    | 0.011  | 3.260 | 1180 | 0.007  | 4.054 | 177    | 0.040  | 2.101 | 1148   | 0.013  | 2.822 | 1325 | 0.015  | 2.777 |
| Total lipids in very large VLDL (mmol/L)*                 | 575      | 0.006  | 6.246 | 605    | 0.014  | 4.800 | 1180 | 0.010  | 5.521 | 177    | 0.087  | 2.419 | 1148   | 0.022  | 3.458 | 1325 | 0.027  | 3.398 |
| Total lipids in large VLDL (mmol/L)*                      | 575      | 0.059  | 3.945 | 605    | 0.121  | 2.488 | 1180 | 0.085  | 3.234 | 177    | 0.423  | 1.287 | 1148   | 0.161  | 1.666 | 1325 | 0.182  | 1.665 |
| Total lipids in medium VLDL (mmol/L)                      | 575      | 0.441  | 0.270 | 605    | 0.478  | 0.272 | 1180 | 0.460  | 0.271 | 177    | 0.959  | 0.630 | 1148   | 0.548  | 0.366 | 1325 | 0.602  | 0.432 |
| Total lipids in small VLDL (mmol/L)                       | 575      | 0.381  | 0.153 | 605    | 0.405  | 0.146 | 1180 | 0.393  | 0.149 | 177    | 0.690  | 0.279 | 1148   | 0.494  | 0.216 | 1325 | 0.520  | 0.234 |
| Total lipids in very small VLDL (mmol/L)                  | 575      | 0.325  | 0.070 | 605    | 0.342  | 0.076 | 1180 | 0.334  | 0.073 | 177    | 0.451  | 0.111 | 1148   | 0.426  | 0.110 | 1325 | 0.429  | 0.110 |
| Total lipids in IDL (mmol/L)                              | 575      | 0.804  | 0.176 | 605    | 0.834  | 0.183 | 1180 | 0.819  | 0.180 | 177    | 0.985  | 0.261 | 1148   | 0.999  | 0.240 | 1325 | 0.997  | 0.242 |
| Total lipids in large LDL (mmol/L)                        | 575      | 0.917  | 0.220 | 605    | 0.941  | 0.228 | 1180 | 0.929  | 0.224 | 177    | 1.162  | 0.327 | 1148   | 1.155  | 0.298 | 1325 | 1.156  | 0.301 |
| Total lipids in medium LDL (mmol/L)                       | 575      | 0.511  | 0.136 | 605    | 0.519  | 0.140 | 1180 | 0.515  | 0.138 | 177    | 0.676  | 0.214 | 1148   | 0.655  | 0.185 | 1325 | 0.658  | 0.189 |
| Total lipids in small LDL (mmol/L)                        | 575      | 0.338  | 0.083 | 605    | 0.340  | 0.087 | 1180 | 0.339  | 0.085 | 177    | 0.439  | 0.135 | 1148   | 0.425  | 0.114 | 1325 | 0.427  | 0.117 |
| Total lipids in very large HDL (mmol/L)                   | 575      | 0.482  | 0.196 | 605    | 0.495  | 0.184 | 1180 | 0.488  | 0.189 | 177    | 0.320  | 0.189 | 1148   | 0.497  | 0.229 | 1325 | 0.474  | 0.232 |
| Total lipids in large HDL (mmol/L)                        | 575      | 0.874  | 0.291 | 605    | 0.859  | 0.275 | 1180 | 0.866  | 0.282 | 177    | 0.509  | 0.335 | 1148   | 0.900  | 0.382 | 1325 | 0.849  | 0.399 |
| Total lipids in medium HDL (mmol/L)                       | 575      | 0.917  | 0.127 | 605    | 0.871  | 0.126 | 1180 | 0.894  | 0.128 | 177    | 0.828  | 0.241 | 1148   | 0.971  | 0.175 | 1325 | 0.952  | 0.191 |
| Total lipids in small HDL (mmol/L)                        | 575      | 1.039  | 0.103 | 605    | 0.997  | 0.115 | 1180 | 1.018  | 0.111 | 177    | 1.055  | 0.254 | 1148   | 1.085  | 0.138 | 1325 | 1.081  | 0.157 |
| <b>Lipoprotein particle size</b>                          |          |        |       |        |        |       |      |        |       |        |        |       |        |        |       |      |        |       |
| Mean diameter for VLDL particles (nm)                     | 575      | 37.063 | 1.633 | 605    | 37.238 | 1.557 | 1180 | 37.152 | 1.591 | 177    | 38.527 | 1.737 | 1148   | 36.943 | 1.599 | 1325 | 37.152 | 1.701 |
| Mean diameter for LDL particles (nm)                      | 575      | 23.587 | 0.103 | 605    | 23.628 | 0.109 | 1180 | 23.608 | 0.107 | 177    | 23.487 | 0.093 | 1148   | 23.573 | 0.100 | 1325 | 23.562 | 0.104 |
| Mean diameter for HDL particles (nm)                      | 575      | 10.081 | 0.233 | 605    | 10.102 | 0.221 | 1180 | 10.092 | 0.226 | 177    | 9.798  | 0.244 | 1148   | 10.068 | 0.262 | 1325 | 10.032 | 0.275 |
| <b>Cholesterol</b>                                        |          |        |       |        |        |       |      |        |       |        |        |       |        |        |       |      |        |       |
| Serum total cholesterol (mmol/L)                          | 575      | 3.576  | 0.620 | 605    | 3.596  | 0.643 | 1180 | 3.586  | 0.629 | 177    | 4.161  | 0.885 | 1148   | 4.234  | 0.828 | 1325 | 4.225  | 0.835 |
| Total cholesterol in VLDL (mmol/L)                        | 575      | 0.438  | 0.188 | 605    | 0.472  | 0.189 | 1180 | 0.455  | 0.189 | 177    | 0.826  | 0.395 | 1148   | 0.592  | 0.265 | 1325 | 0.623  | 0.295 |
| Remnant cholesterol (nonHDL, nonLDL cholesterol) (mmol/L) | 575      | 0.944  | 0.269 | 605    | 0.994  | 0.271 | 1180 | 0.970  | 0.270 | 177    | 1.452  | 0.472 | 1148   | 1.219  | 0.383 | 1325 | 1.250  | 0.402 |
| Total cholesterol in LDL (mmol/L)                         | 575      | 1.130  | 0.330 | 605    | 1.149  | 0.341 | 1180 | 1.139  | 0.334 | 177    | 1.492  | 0.498 | 1148   | 1.460  | 0.442 | 1325 | 1.464  | 0.449 |
| Total cholesterol in HDL (mmol/L)                         | 575      | 1.503  | 0.274 | 605    | 1.453  | 0.266 | 1180 | 1.477  | 0.270 | 177    | 1.217  | 0.350 | 1148   | 1.556  | 0.363 | 1325 | 1.511  | 0.379 |
| Total cholesterol in HDL2 (mmol/L)                        | 575      | 1.035  | 0.254 | 605    | 0.988  | 0.246 | 1180 | 1.011  | 0.250 | 177    | 0.751  | 0.327 | 1148   | 1.072  | 0.335 | 1325 | 1.030  | 0.351 |
| Total cholesterol in HDL3 (mmol/L)                        | 575      | 0.468  | 0.024 | 605    | 0.466  | 0.024 | 1180 | 0.467  | 0.024 | 177    | 0.466  | 0.035 | 1148   | 0.483  | 0.033 | 1325 | 0.481  | 0.034 |
| Esterified cholesterol (mmol/L)                           | 572      | 2.516  | 0.447 | 604    | 2.517  | 0.460 | 1176 | 2.517  | 0.452 | 176    | 2.941  | 0.636 | 1147   | 2.975  | 0.593 | 1323 | 2.971  | 0.597 |
| Free cholesterol (mmol/L)                                 | 572      | 1.062  | 0.179 | 604    | 1.079  | 0.186 | 1176 | 1.070  | 0.182 | 176    | 1.211  | 0.273 | 1147   | 1.260  | 0.239 | 1323 | 1.253  | 0.244 |
| <b>Glycerides and phospholipids</b>                       |          |        |       |        |        |       |      |        |       |        |        |       |        |        |       |      |        |       |
| Serum total triglycerides (mmol/L)*                       | 575      | 0.918  | 0.709 | 605    | 1.005  | 0.681 | 1180 | 0.962  | 0.696 | 177    | 1.686  | 0.809 | 1148   | 1.129  | 0.755 | 1325 | 1.190  | 0.782 |
| Triglycerides in VLDL (mmol/L)*                           | 575      | 0.582  | 0.885 | 605    | 0.648  | 0.830 | 1180 | 0.615  | 0.858 | 177    | 1.249  | 0.927 | 1148   | 0.694  | 0.945 | 1325 | 0.750  | 0.972 |
| Triglycerides in LDL (mmol/L)                             | 575      | 0.113  | 0.024 | 605    | 0.123  | 0.027 | 1180 | 0.118  | 0.026 | 177    | 0.153  | 0.040 | 1148   | 0.158  | 0.044 | 1325 | 0.157  | 0.043 |
| Triglycerides in HDL (mmol/L)                             | 575      | 0.129  | 0.030 | 605    | 0.136  | 0.030 | 1180 | 0.133  | 0.030 | 177    | 0.161  | 0.047 | 1148   | 0.151  | 0.040 | 1325 | 0.153  | 0.041 |
| Total phosphoglycerides (mmol/L)                          | 572      | 1.632  | 0.240 | 604    | 1.620  | 0.261 | 1176 | 1.626  | 0.250 | 176    | 1.865  | 0.354 | 1147   | 1.926  | 0.340 | 1323 | 1.918  | 0.342 |
| Ratio of triglycerides to phosphoglycerides               | 572      | 0.526  | 0.253 | 604    | 0.569  | 0.277 | 1176 | 0.548  | 0.265 | 176    | 0.946  | 0.587 | 1147   | 0.580  | 0.279 | 1323 | 0.628  | 0.355 |
| Phosphatidylcholine & other cholines (mmol/L)             | 572      | 1.691  | 0.240 | 604    | 1.687  | 0.267 | 1176 | 1.689  | 0.253 | 175    | 1.877  | 0.320 | 1147   | 1.978  | 0.336 | 1322 | 1.965  | 0.335 |
| Sphingomyelins (mmol/L)                                   | 572      | 0.348  | 0.061 | 604    | 0.349  | 0.064 | 1176 | 0.348  | 0.062 | 175    | 0.370  | 0.070 | 1147   | 0.397  | 0.078 | 1322 | 0.394  | 0.077 |
| Total cholines (mmol/L)                                   | 572      | 2.005  | 0.256 | 604    | 1.997  | 0.264 | 1176 | 2.001  | 0.259 | 175    | 2.185  | 0.334 | 1147   | 2.317  | 0.351 | 1322 | 2.299  | 0.351 |
| <b>Apolipoproteins</b>                                    |          |        |       |        |        |       |      |        |       |        |        |       |        |        |       |      |        |       |
| Apolipoprotein A1 (g/L)                                   | 575      | 1.509  | 0.159 | 605    | 1.484  | 0.151 | 1180 | 1.497  | 0.155 | 177    | 1.461  | 0.178 | 1148   | 1.589  | 0.205 | 1325 | 1.572  | 0.206 |
| Apolipoprotein B (g/L)                                    | 575      | 0.682  | 0.135 | 604    | 0.706  | 0.136 | 1179 | 0.694  | 0.135 | 177    | 0.955  | 0.245 | 1148   | 0.812  | 0.196 | 1325 | 0.831  | 0.208 |
| Ratio of apolipoprotein B to apolipoprotein A             | 575      | 0.455  | 0.097 | 604    | 0.479  | 0.098 | 1179 | 0.467  | 0.098 | 177    | 0.660  | 0.178 | 1148   | 0.518  | 0.136 | 1325 | 0.537  | 0.150 |
| <b>Fatty acids</b>                                        |          |        |       |        |        |       |      |        |       |        |        |       |        |        |       |      |        |       |
| Total fatty acids (mmol/L)                                | 570      | 9.215  | 1.697 | 604    | 9.370  | 1.730 | 1174 | 9.294  | 1.709 | 173    | 11.850 | 2.723 | 1145   | 10.917 | 2.392 | 1318 | 11.034 | 2.446 |
| Estimated degree of unsaturation                          | 570      | 1.212  | 0.056 | 604    | 1.196  | 0.065 | 1174 | 1.204  | 0.061 | 173    | 1.179  | 0.070 | 1145   | 1.212  | 0.066 | 1318 | 1.208  | 0.068 |
| 22:6, docosahexaenoic acid (mmol/L)                       | 570      | 0.078  | 0.028 | 604    | 0.074  | 0.029 | 1174 | 0.076  | 0.028 | 173    | 0.118  | 0.051 | 1145   | 0.111  | 0.039 | 1318 | 0.112  | 0.041 |
| 18:2, linoleic acid (mmol/L)                              | 570      | 2.539  | 0.456 | 604    | 2.592  | 0.464 | 1174 | 2.566  | 0.459 | 173    | 2.919  | 0.567 | 1145   | 2.880  | 0.584 | 1318 | 2.885  | 0.580 |
| Omega3 fatty acids (mmol/L)                               | 570      | 0.309  | 0.086 | 604    | 0.296  | 0.083 | 1174 | 0.302  | 0.085 | 173    | 0.451  | 0.160 | 1145   | 0.400  | 0.117 | 1318 | 0.406  | 0.124 |
| Omega6 fatty acids (mmol/L)                               | 570      | 3.077  | 0.493 | 604    | 3.094  | 0.492 | 1174 | 3.086  | 0.491 | 173    | 3.553  | 0.648 | 1145   | 3.507  | 0.627 | 1318 | 3.513  | 0.628 |
| Polyunsat. fatty acids (mmol/L)                           | 570      | 3.386  | 0.565 | 604    | 3.390  | 0.561 | 1174 | 3.388  | 0.560 | 173    | 4.004  | 0.775 | 1145   | 3.907  | 0.721 | 1318 | 3.919  | 0.726 |
| Monounsat. fatty acids; 16:1, 18:1 (mmol/L)               | 570      | 2.500  | 0.632 | 604    | 2.587  | 0.661 | 1174 | 2.544  | 0.646 | 173    | 3.520  | 1.058 | 1145   | 3.080  | 0.917 | 1318 | 3.135  | 0.943 |
| Saturated fatty acids (mmol/L)                            | 570      | 3.328  | 0.642 | 604    | 3.393  | 0.682 | 1174 | 3.362  | 0.661 | 173    | 4.325  | 1.088 | 1145   | 3.930  | 0.932 | 1318 | 3.979  | 0.958 |

1  
2  
3  
4  
5  
6  
7  
8  
9  
10  
11  
12  
13  
14  
15  
16  
17  
18  
19  
20  
21  
22  
23  
24  
25  
26  
27  
28  
29  
30  
31  
32  
33  
34  
35  
36  
37  
38  
39  
40  
41  
42  
43  
44  
45  
46  
47

**Fatty acid ratios**

|                                                             |     |        |       |     |        |       |      |        |       |     |        |       |      |        |       |      |        |       |
|-------------------------------------------------------------|-----|--------|-------|-----|--------|-------|------|--------|-------|-----|--------|-------|------|--------|-------|------|--------|-------|
| Ratio of 22:6 docosahexaenoic acid to total fatty acids (%) | 570 | 0.841  | 0.239 | 604 | 0.790  | 0.269 | 1174 | 0.815  | 0.255 | 173 | 0.984  | 0.315 | 1145 | 1.023  | 0.284 | 1318 | 1.018  | 0.287 |
| Ratio of 18:2 linoleic acid to total fatty acids (%)        | 570 | 27.741 | 3.127 | 604 | 27.867 | 3.274 | 1174 | 27.805 | 3.191 | 173 | 25.038 | 3.570 | 1145 | 26.656 | 3.417 | 1318 | 26.453 | 3.467 |
| Ratio of omega3 fatty acids to total fatty acids (%)        | 570 | 3.329  | 0.579 | 604 | 3.150  | 0.600 | 1174 | 3.238  | 0.594 | 173 | 3.763  | 0.799 | 1145 | 3.659  | 0.697 | 1318 | 3.672  | 0.709 |
| Ratio of omega6 fatty acids to total fatty acids (%)        | 570 | 33.650 | 3.047 | 604 | 33.308 | 3.228 | 1174 | 33.475 | 3.133 | 173 | 30.468 | 3.757 | 1145 | 32.502 | 3.311 | 1318 | 32.247 | 3.424 |
| Ratio of polyunsat. fatty acids to total fatty acids (%)    | 570 | 36.979 | 3.235 | 604 | 36.459 | 3.514 | 1174 | 36.713 | 3.377 | 173 | 34.231 | 3.878 | 1145 | 36.161 | 3.588 | 1318 | 35.918 | 3.669 |
| Ratio of monounsat. fatty acids to total fatty acids (%)    | 570 | 26.911 | 2.569 | 604 | 27.375 | 2.678 | 1174 | 27.148 | 2.625 | 173 | 29.366 | 2.968 | 1145 | 27.889 | 2.842 | 1318 | 28.075 | 2.891 |
| Ratio of saturated fatty acids to total fatty acids (%)     | 570 | 36.110 | 1.675 | 604 | 36.167 | 1.802 | 1174 | 36.139 | 1.734 | 173 | 36.402 | 2.027 | 1145 | 35.950 | 2.032 | 1318 | 36.007 | 2.031 |

**Glycolysis related**

|                    |     |       |       |     |       |       |      |       |       |     |       |       |      |       |       |      |       |       |
|--------------------|-----|-------|-------|-----|-------|-------|------|-------|-------|-----|-------|-------|------|-------|-------|------|-------|-------|
| Glucose (mmol/L)*  | 574 | 1.350 | 0.115 | 605 | 1.336 | 0.105 | 1179 | 1.342 | 0.11  | 176 | 1.415 | 0.205 | 1148 | 1.334 | 0.176 | 1324 | 1.344 | 0.182 |
| Lactate (mmol/L)   | 575 | 1.770 | 0.459 | 605 | 1.718 | 0.434 | 1180 | 1.743 | 0.446 | 177 | 1.696 | 0.472 | 1148 | 1.562 | 0.480 | 1325 | 1.580 | 0.480 |
| Pyruvate (mmol/L)  | 574 | 0.100 | 0.024 | 605 | 0.098 | 0.023 | 1179 | 0.099 | 0.023 | 177 | 0.101 | 0.031 | 1147 | 0.093 | 0.034 | 1324 | 0.094 | 0.033 |
| Citrate (mmol/L)   | 575 | 0.125 | 0.017 | 604 | 0.131 | 0.018 | 1179 | 0.128 | 0.018 | 177 | 0.110 | 0.016 | 1148 | 0.111 | 0.016 | 1325 | 0.111 | 0.016 |
| Glycerol (mmol/L)# | 240 | 0.078 | 0.021 | 283 | 0.083 | 0.022 | 523  | 0.081 | 0.021 | 84  | 0.073 | 0.021 | 470  | 0.071 | 0.023 | 554  | 0.071 | 0.023 |

**Amino acids**

|                        |     |       |       |     |       |       |      |       |       |     |       |       |      |       |       |      |       |       |
|------------------------|-----|-------|-------|-----|-------|-------|------|-------|-------|-----|-------|-------|------|-------|-------|------|-------|-------|
| Alanine (mmol/L)       | 575 | 0.387 | 0.061 | 605 | 0.396 | 0.060 | 1180 | 0.391 | 0.060 | 176 | 0.423 | 0.065 | 1147 | 0.399 | 0.060 | 1323 | 0.402 | 0.061 |
| Glutamine (mmol/L)     | 575 | 0.474 | 0.050 | 605 | 0.497 | 0.051 | 1180 | 0.485 | 0.051 | 177 | 0.490 | 0.063 | 1148 | 0.456 | 0.066 | 1325 | 0.461 | 0.066 |
| Glycine (mmol/L)       | 574 | 0.261 | 0.032 | 604 | 0.270 | 0.034 | 1178 | 0.265 | 0.033 | 176 | 0.243 | 0.029 | 1148 | 0.274 | 0.061 | 1324 | 0.270 | 0.059 |
| Histidine (mmol/L)     | 574 | 0.065 | 0.009 | 605 | 0.065 | 0.008 | 1179 | 0.065 | 0.008 | 176 | 0.066 | 0.008 | 1148 | 0.065 | 0.009 | 1324 | 0.065 | 0.009 |
| Isoleucine (mmol/L)    | 574 | 0.054 | 0.019 | 605 | 0.053 | 0.019 | 1179 | 0.054 | 0.019 | 174 | 0.072 | 0.021 | 1146 | 0.055 | 0.020 | 1320 | 0.057 | 0.021 |
| Leucine (mmol/L)       | 575 | 0.073 | 0.019 | 605 | 0.071 | 0.019 | 1180 | 0.072 | 0.019 | 177 | 0.097 | 0.029 | 1148 | 0.074 | 0.021 | 1325 | 0.077 | 0.023 |
| Valine (mmol/L)        | 575 | 0.162 | 0.037 | 604 | 0.156 | 0.035 | 1179 | 0.159 | 0.036 | 177 | 0.192 | 0.036 | 1147 | 0.162 | 0.042 | 1324 | 0.166 | 0.042 |
| Phenylalanine (mmol/L) | 575 | 0.068 | 0.009 | 605 | 0.066 | 0.009 | 1180 | 0.067 | 0.009 | 177 | 0.073 | 0.011 | 1148 | 0.072 | 0.011 | 1325 | 0.073 | 0.011 |
| Tyrosine (mmol/L)      | 574 | 0.054 | 0.014 | 605 | 0.055 | 0.014 | 1179 | 0.055 | 0.014 | 176 | 0.060 | 0.013 | 1148 | 0.054 | 0.015 | 1324 | 0.055 | 0.015 |

**Ketone bodies**

|                             |     |       |       |     |       |       |      |       |       |     |       |       |      |       |       |      |       |       |
|-----------------------------|-----|-------|-------|-----|-------|-------|------|-------|-------|-----|-------|-------|------|-------|-------|------|-------|-------|
| Acetate (mmol/L)*           | 575 | 0.031 | 0.423 | 605 | 0.030 | 0.404 | 1180 | 0.030 | 0.413 | 177 | 0.037 | 0.655 | 1146 | 0.033 | 0.600 | 1323 | 0.034 | 0.609 |
| Acetoacetate (mmol/L)*      | 575 | 0.025 | 1.310 | 605 | 0.023 | 1.429 | 1180 | 0.024 | 1.367 | 177 | 0.023 | 2.116 | 1147 | 0.024 | 1.278 | 1324 | 0.024 | 1.403 |
| 3hydroxybutyrate (mmol/L)*# | 555 | 0.100 | 0.786 | 580 | 0.103 | 0.826 | 1135 | 0.101 | 0.805 | 170 | 0.104 | 0.669 | 1098 | 0.096 | 0.781 | 1268 | 0.097 | 0.769 |

**Fluid balance**

|                       |     |       |       |     |       |       |      |       |       |     |       |       |      |       |       |      |       |       |
|-----------------------|-----|-------|-------|-----|-------|-------|------|-------|-------|-----|-------|-------|------|-------|-------|------|-------|-------|
| Albumin (signal area) | 574 | 0.093 | 0.005 | 605 | 0.092 | 0.005 | 1179 | 0.093 | 0.005 | 177 | 0.090 | 0.005 | 1148 | 0.088 | 0.005 | 1325 | 0.089 | 0.005 |
| Creatinine (mmol/L)   | 570 | 0.040 | 0.006 | 600 | 0.040 | 0.006 | 1170 | 0.040 | 0.006 | 173 | 0.066 | 0.015 | 1139 | 0.054 | 0.009 | 1312 | 0.055 | 0.010 |

**Inflammation**

|                                                           |     |       |       |     |       |       |      |       |       |     |       |       |      |       |       |      |       |       |
|-----------------------------------------------------------|-----|-------|-------|-----|-------|-------|------|-------|-------|-----|-------|-------|------|-------|-------|------|-------|-------|
| Glycoprotein acetyls, mainly a1acid glycoprotein (mmol/L) | 575 | 1.170 | 0.191 | 605 | 1.173 | 0.186 | 1180 | 1.172 | 0.188 | 177 | 1.375 | 0.366 | 1148 | 1.242 | 0.233 | 1325 | 1.260 | 0.258 |
|-----------------------------------------------------------|-----|-------|-------|-----|-------|-------|------|-------|-------|-----|-------|-------|------|-------|-------|------|-------|-------|

\* geometric mean [relative SD] when skewed variable

# Note: The presence of ethanol in a sample can affect quantification of glycerol and on some occasions 3hydroxybutyrate.

Ethanol can be introduced in to a sample from disinfectants used during blood collection/processing of sample.

Supplementary table 2: Mean difference in metabolite levels in adults compared to children in absolute concentration unit

| Metabolic subgroup                                        | Differences by age (Adults - Child) |                  |         |              | Conversion factor (SD) # |
|-----------------------------------------------------------|-------------------------------------|------------------|---------|--------------|--------------------------|
|                                                           | Estimate                            | 95% CI           | P-value | Adj_p-value^ |                          |
| <b>Lipoprotein subclass lipids</b>                        |                                     |                  |         |              |                          |
| Total lipids in chylomicrons & ex.large VLDL (mmol/L)*    | 0.704                               | (0.519, 0.890)   | <0.001  | <0.001       | 2.534                    |
| Total lipids in very large VLDL (mmol/L)*                 | 0.922                               | (0.700, 1.145)   | <0.001  | <0.001       | 3.031                    |
| Total lipids in large VLDL (mmol/L)*                      | 0.648                               | (0.502, 0.795)   | <0.001  | <0.001       | 1.950                    |
| Total lipids in medium VLDL (mmol/L)                      | 0.105                               | (0.080, 0.129)   | <0.001  | <0.001       | 0.348                    |
| Total lipids in small VLDL (mmol/L)                       | 0.107                               | (0.094, 0.121)   | <0.001  | <0.001       | 0.199                    |
| Total lipids in very small VLDL (mmol/L)                  | 0.093                               | (0.086, 0.099)   | <0.001  | <0.001       | 0.104                    |
| Total lipids in IDL (mmol/L)                              | 0.181                               | (0.166, 0.196)   | <0.001  | <0.001       | 0.230                    |
| Total lipids in large LDL (mmol/L)                        | 0.229                               | (0.211, 0.247)   | <0.001  | <0.001       | 0.286                    |
| Total lipids in medium LDL (mmol/L)                       | 0.144                               | (0.132, 0.155)   | <0.001  | <0.001       | 0.178                    |
| Total lipids in small LDL (mmol/L)                        | 0.089                               | (0.082, 0.096)   | <0.001  | <0.001       | 0.110                    |
| Total lipids in very large HDL (mmol/L)                   | 0.012                               | (-0.003, 0.027)  | 0.128   | 0.132        | 0.217                    |
| Total lipids in large HDL (mmol/L)                        | 0.032                               | (0.007, 0.057)   | 0.011   | 0.012        | 0.353                    |
| Total lipids in medium HDL (mmol/L)                       | 0.076                               | (0.064, 0.089)   | <0.001  | <0.001       | 0.166                    |
| Total lipids in small HDL (mmol/L)                        | 0.068                               | (0.058, 0.078)   | <0.001  | <0.001       | 0.137                    |
| <b>Lipoprotein particle size</b>                          |                                     |                  |         |              |                          |
| Mean diameter for VLDL particles (nm)                     | -0.147                              | (-0.263, -0.031) | 0.013   | 0.014        | 1.633                    |
| Mean diameter for LDL particles (nm)                      | -0.044                              | (-0.052, -0.037) | <0.001  | <0.001       | 0.106                    |
| Mean diameter for HDL particles (nm)                      | -0.027                              | (-0.045, -0.010) | 0.002   | 0.003        | 0.256                    |
| <b>Cholesterol</b>                                        |                                     |                  |         |              |                          |
| Serum total cholesterol (mmol/L)                          | 0.670                               | (0.619, 0.721)   | <0.001  | <0.001       | 0.805                    |
| Total cholesterol in VLDL (mmol/L)                        | 0.146                               | (0.129, 0.163)   | <0.001  | <0.001       | 0.249                    |
| Remnant cholesterol (nonHDL, nonLDL cholesterol) (mmol/L) | 0.261                               | (0.237, 0.284)   | <0.001  | <0.001       | 0.357                    |
| Total cholesterol in LDL (mmol/L)                         | 0.327                               | (0.300, 0.354)   | <0.001  | <0.001       | 0.424                    |
| Total cholesterol in HDL (mmol/L)                         | 0.082                               | (0.058, 0.106)   | <0.001  | <0.001       | 0.337                    |
| Total cholesterol in HDL2 (mmol/L)                        | 0.064                               | (0.042, 0.086)   | <0.001  | <0.001       | 0.311                    |
| Total cholesterol in HDL3 (mmol/L)                        | 0.018                               | (0.016, 0.020)   | <0.001  | <0.001       | 0.031                    |
| Esterified cholesterol (mmol/L)                           | 0.474                               | (0.437, 0.511)   | <0.001  | <0.001       | 0.576                    |
| Free cholesterol (mmol/L)                                 | 0.195                               | (0.180, 0.210)   | <0.001  | <0.001       | 0.234                    |
| <b>Glycerides and phospholipids</b>                       |                                     |                  |         |              |                          |
| Serum total triglycerides (mmol/L)*                       | 0.176                               | (0.145, 0.206)   | <0.001  | <0.001       | 0.443                    |
| Triglycerides in VLDL (mmol/L)*                           | 0.140                               | (0.096, 0.183)   | <0.001  | <0.001       | 0.615                    |
| Triglycerides in LDL (mmol/L)                             | 0.040                               | (0.038, 0.043)   | <0.001  | <0.001       | 0.042                    |
| Triglycerides in HDL (mmol/L)                             | 0.020                               | (0.017, 0.022)   | <0.001  | <0.001       | 0.037                    |
| Total phosphoglycerides (mmol/L)                          | 0.311                               | (0.290, 0.332)   | <0.001  | <0.001       | 0.337                    |
| Ratio of triglycerides to phosphoglycerides               | 0.049                               | (0.027, 0.071)   | <0.001  | <0.001       | 0.299                    |
| Phosphatidylcholine & other cholines (mmol/L)             | 0.295                               | (0.274, 0.316)   | <0.001  | <0.001       | 0.329                    |
| Sphingomyelins (mmol/L)                                   | 0.052                               | (0.047, 0.057)   | <0.001  | <0.001       | 0.075                    |
| Total cholines (mmol/L)                                   | 0.323                               | (0.302, 0.345)   | <0.001  | <0.001       | 0.347                    |
| <b>Apolipoproteins</b>                                    |                                     |                  |         |              |                          |
| Apolipoprotein A1 (g/L)                                   | 0.099                               | (0.086, 0.112)   | <0.001  | <0.001       | 0.191                    |
| Apolipoprotein B (g/L)                                    | 0.125                               | (0.113, 0.137)   | <0.001  | <0.001       | 0.182                    |
| Ratio of apolipoprotein B to apolipoprotein A1            | 0.055                               | (0.046, 0.064)   | <0.001  | <0.001       | 0.127                    |
| <b>Fatty acids</b>                                        |                                     |                  |         |              |                          |
| Total fatty acids (mmol/L)                                | 1.738                               | (1.592, 1.885)   | <0.001  | <0.001       | 2.245                    |
| Estimated degree of unsaturation                          | 0.005                               | (0.000, 0.009)   | 0.030   | 0.031        | 0.063                    |
| 22:6, docosahexaenoic acid (mmol/L)                       | 0.037                               | (0.035, 0.040)   | <0.001  | <0.001       | 0.040                    |
| 18:2, linoleic acid (mmol/L)                              | 0.347                               | (0.310, 0.384)   | <0.001  | <0.001       | 0.545                    |
| Omega3 fatty acids (mmol/L)                               | 0.105                               | (0.098, 0.113)   | <0.001  | <0.001       | 0.118                    |
| Omega6 fatty acids (mmol/L)                               | 0.453                               | (0.414, 0.492)   | <0.001  | <0.001       | 0.597                    |
| Polyunsat. fatty acids (mmol/L)                           | 0.558                               | (0.513, 0.603)   | <0.001  | <0.001       | 0.695                    |
| Monounsat. fatty acids; 16:1, 18:1 (mmol/L)               | 0.568                               | (0.512, 0.625)   | <0.001  | <0.001       | 0.850                    |
| Saturated fatty acids (mmol/L)                            | 0.612                               | (0.554, 0.669)   | <0.001  | <0.001       | 0.862                    |

**Fatty acid ratios**

|                                                             |        |                  |        |        |       |
|-------------------------------------------------------------|--------|------------------|--------|--------|-------|
| Ratio of 22:6 docosahexaenoic acid to total fatty acids (%) | 0.209  | (0.190, 0.228)   | <0.001 | <0.001 | 0.292 |
| Ratio of 18:2 linoleic acid to total fatty acids (%)        | -1.079 | (-1.331, -0.827) | <0.001 | <0.001 | 3.387 |
| Ratio of omega3 fatty acids to total fatty acids (%)        | 0.446  | (0.403, 0.490)   | <0.001 | <0.001 | 0.693 |
| Ratio of omega6 fatty acids to total fatty acids (%)        | -0.992 | (-1.227, -0.757) | <0.001 | <0.001 | 3.296 |
| Ratio of polyunsat. fatty acids to total fatty acids (%)    | -0.546 | (-0.794, -0.298) | <0.001 | <0.001 | 3.507 |
| Ratio of monounsat. fatty acids to total fatty acids (%)    | 0.741  | (0.547, 0.934)   | <0.001 | <0.001 | 2.797 |
| Ratio of saturated fatty acids to total fatty acids (%)     | -0.195 | (-0.328, -0.062) | 0.004  | 0.005  | 1.863 |

**Glycolysis related**

|                   |        |                  |        |        |       |
|-------------------|--------|------------------|--------|--------|-------|
| Glucose (mmol/L)* | -0.002 | (-0.014, 0.009)  | 0.700  | 0.709  | 0.147 |
| Lactate (mmol/L)  | -0.180 | (-0.215, -0.144) | <0.001 | <0.001 | 0.471 |
| Pyruvate (mmol/L) | -0.007 | (-0.009, -0.005) | <0.001 | <0.001 | 0.029 |
| Citrate (mmol/L)  | -0.017 | (-0.018, -0.016) | <0.001 | <0.001 | 0.019 |
| Glycerol (mmol/L) | -0.011 | (-0.015, -0.008) | <0.001 | <0.001 | 0.023 |

**Amino acids**

|                        |        |                  |        |        |       |
|------------------------|--------|------------------|--------|--------|-------|
| Alanine (mmol/L)       | 0.013  | (0.009, 0.017)   | <0.001 | <0.001 | 0.060 |
| Glutamine (mmol/L)     | -0.023 | (-0.027, -0.019) | <0.001 | <0.001 | 0.060 |
| Glycine (mmol/L)       | 0.007  | (0.003, 0.010)   | <0.001 | <0.001 | 0.049 |
| Histidine (mmol/L)     | 0.001  | (0.000, 0.002)   | 0.005  | 0.006  | 0.009 |
| Isoleucine (mmol/L)    | 0.003  | (0.002, 0.004)   | <0.001 | <0.001 | 0.019 |
| Leucine (mmol/L)       | 0.004  | (0.003, 0.006)   | <0.001 | <0.001 | 0.021 |
| Valine (mmol/L)        | 0.009  | (0.006, 0.011)   | <0.001 | <0.001 | 0.039 |
| Phenylalanine (mmol/L) | 0.005  | (0.005, 0.006)   | <0.001 | <0.001 | 0.010 |
| Tyrosine (mmol/L)      | 0.001  | (-0.000, 0.002)  | 0.100  | 0.105  | 0.014 |

**Ketone bodies**

|                            |        |                  |        |        |       |
|----------------------------|--------|------------------|--------|--------|-------|
| Acetate (mmol/L)*          | 0.101  | (0.084, 0.117)   | <0.001 | <0.001 | 0.235 |
| Acetoacetate (mmol/L)*     | -0.004 | (-0.086, 0.078)  | 0.922  | 0.922  | 1.022 |
| 3hydroxybutyrate (mmol/L)* | -0.064 | (-0.100, -0.028) | 0.001  | 0.001  | 0.493 |

**Fluid balance**

|                       |        |                  |        |        |       |
|-----------------------|--------|------------------|--------|--------|-------|
| Albumin (signal area) | -0.004 | (-0.004, -0.004) | <0.001 | <0.001 | 0.005 |
| Creatinine (mmol/L)   | 0.016  | (0.015, 0.017)   | <0.001 | 0.001  | 0.012 |

**Inflammation**

|                                                           |       |                |        |        |       |
|-----------------------------------------------------------|-------|----------------|--------|--------|-------|
| Glycoprotein acetyls, mainly a1acid glycoprotein (mmol/L) | 0.062 | (0.047, 0.078) | <0.001 | <0.001 | 0.217 |
|-----------------------------------------------------------|-------|----------------|--------|--------|-------|

\* Metabolite has been log transformed

^ Benjamini-Hochberg adjusted p-value

# Associations in Figure 2 are presented in SD-units. The conversion factor provided (unweighted standard deviation of each metabolite measure) can be used to convert the association in absolute concentration to SD units by dividing by the conversion factor. Where metabolite has been log transformed conversion factor is standard deviation of log transformed metabolite



Supplementary table 3: Differences in mean metabolite levels in girls compared to boys in absolute concentration units.

| Metabolic subgroup                                          | Differences for children (Female - Male) |                  |        |                          |                          |
|-------------------------------------------------------------|------------------------------------------|------------------|--------|--------------------------|--------------------------|
|                                                             | Estimate                                 | 95% CI           | pvalue | Adj_p-value <sup>^</sup> | Conversion factor (SD) # |
| <b>Lipoprotein subclass lipids</b>                          |                                          |                  |        |                          |                          |
| Total lipids in chylomicrons & ex.large VLDL (mmol/L)*      | 0.737                                    | (0.414, 1.059)   | <0.001 | <0.001                   | 2.845                    |
| Total lipids in very large VLDL (mmol/L)*                   | 0.744                                    | (0.355, 1.134)   | <0.001 | 0.001                    | 3.428                    |
| Total lipids in large VLDL (mmol/L)*                        | 0.663                                    | (0.390, 0.936)   | <0.001 | <0.001                   | 2.411                    |
| Total lipids in medium VLDL (mmol/L)                        | 0.049                                    | (0.018, 0.080)   | 0.002  | 0.004                    | 0.269                    |
| Total lipids in small VLDL (mmol/L)                         | 0.032                                    | (0.015, 0.048)   | <0.001 | 0.001                    | 0.146                    |
| Total lipids in very small VLDL (mmol/L)                    | 0.018                                    | (0.010, 0.027)   | <0.001 | <0.001                   | 0.074                    |
| Total lipids in IDL (mmol/L)                                | 0.025                                    | (0.004, 0.046)   | 0.017  | 0.035                    | 0.182                    |
| Total lipids in large LDL (mmol/L)                          | 0.020                                    | (-0.006, 0.046)  | 0.132  | 0.187                    | 0.227                    |
| Total lipids in medium LDL (mmol/L)                         | 0.008                                    | (-0.008, 0.024)  | 0.338  | 0.416                    | 0.139                    |
| Total lipids in small LDL (mmol/L)                          | 0.001                                    | (-0.008, 0.011)  | 0.788  | 0.822                    | 0.086                    |
| Total lipids in very large HDL (mmol/L)                     | -0.002                                   | (-0.023, 0.020)  | 0.882  | 0.882                    | 0.190                    |
| Total lipids in large HDL (mmol/L)                          | -0.033                                   | (-0.066, -0.001) | 0.044  | 0.074                    | 0.283                    |
| Total lipids in medium HDL (mmol/L)                         | -0.045                                   | (-0.059, -0.030) | <0.001 | <0.001                   | 0.131                    |
| Total lipids in small HDL (mmol/L)                          | -0.035                                   | (-0.048, -0.022) | <0.001 | <0.001                   | 0.116                    |
| <b>Lipoprotein particle size</b>                            |                                          |                  |        |                          |                          |
| Mean diameter for VLDL particles (nm)                       | 0.215                                    | (0.035, 0.395)   | 0.019  | 0.038                    | 1.580                    |
| Mean diameter for LDL particles (nm)                        | 0.035                                    | (0.023, 0.047)   | <0.001 | 0.000                    | 0.108                    |
| Mean diameter for HDL particles (nm)                        | 0.003                                    | (-0.023, 0.028)  | 0.847  | 0.870                    | 0.226                    |
| <b>Cholesterol</b>                                          |                                          |                  |        |                          |                          |
| Serum total cholesterol (mmol/L)                            | 0.007                                    | (-0.066, 0.079)  | 0.857  | 0.869                    | 0.634                    |
| Total cholesterol in VLDL (mmol/L)                          | 0.040                                    | (0.019, 0.061)   | <0.001 | 0.001                    | 0.184                    |
| Remnant cholesterol (nonHDL, nonLDL cholesterol) (mmol/L)   | 0.053                                    | (0.023, 0.083)   | 0.001  | 0.002                    | 0.265                    |
| Total cholesterol in LDL (mmol/L)                           | 0.016                                    | (-0.023, 0.054)  | 0.427  | 0.518                    | 0.336                    |
| Total cholesterol in HDL (mmol/L)                           | -0.062                                   | (-0.093, -0.031) | <0.001 | <0.001                   | 0.273                    |
| Total cholesterol in HDL2 (mmol/L)                          | -0.059                                   | (-0.087, -0.030) | <0.001 | <0.001                   | 0.253                    |
| Total cholesterol in HDL3 (mmol/L)                          | -0.003                                   | (-0.006, -0.001) | 0.013  | 0.027                    | 0.024                    |
| Esterified cholesterol (mmol/L)                             | -0.008                                   | (-0.060, 0.044)  | 0.755  | 0.798                    | 0.455                    |
| Free cholesterol (mmol/L)                                   | 0.013                                    | (-0.008, 0.034)  | 0.211  | 0.284                    | 0.184                    |
| <b>Glycerides and phospholipids</b>                         |                                          |                  |        |                          |                          |
| Serum total triglycerides (mmol/L)*                         | 0.101                                    | (0.056, 0.145)   | <0.001 | <0.001                   | 0.390                    |
| Triglycerides in VLDL (mmol/L)*                             | 0.125                                    | (0.062, 0.187)   | <0.001 | <0.001                   | 0.551                    |
| Triglycerides in LDL (mmol/L)                               | 0.009                                    | (0.006, 0.012)   | <0.001 | <0.001                   | 0.026                    |
| Triglycerides in HDL (mmol/L)                               | 0.007                                    | (0.004, 0.011)   | <0.001 | <0.001                   | 0.029                    |
| Total phosphoglycerides (mmol/L)                            | -0.018                                   | (-0.047, 0.010)  | 0.206  | 0.282                    | 0.249                    |
| Ratio of triglycerides to phosphoglycerides                 | 0.051                                    | (0.020, 0.083)   | 0.001  | 0.003                    | 0.274                    |
| Phosphatidylcholine & other cholines (mmol/L)               | -0.011                                   | (-0.040, 0.018)  | 0.447  | 0.534                    | 0.251                    |
| Sphingomyelins (mmol/L)                                     | -0.001                                   | (-0.009, 0.006)  | 0.706  | 0.757                    | 0.063                    |
| Total cholines (mmol/L)                                     | -0.017                                   | (-0.046, 0.013)  | 0.268  | 0.354                    | 0.257                    |
| <b>Apolipoproteins</b>                                      |                                          |                  |        |                          |                          |
| Apolipoprotein A1 (g/L)                                     | -0.030                                   | (-0.048, -0.013) | 0.001  | 0.002                    | 0.155                    |
| Apolipoprotein B (g/L)                                      | 0.027                                    | (0.012, 0.042)   | 0.001  | 0.002                    | 0.133                    |
| Ratio of apolipoprotein B to apolipoprotein A1              | 0.027                                    | (0.016, 0.038)   | <0.001 | <0.001                   | 0.098                    |
| <b>Fatty acids</b>                                          |                                          |                  |        |                          |                          |
| Total fatty acids (mmol/L)                                  | 0.200                                    | (0.011, 0.389)   | 0.038  | 0.065                    | 1.650                    |
| Estimated degree of unsaturation                            | -0.016                                   | (-0.022, -0.009) | <0.001 | <0.001                   | 0.060                    |
| 22:6, docosahexaenoic acid (mmol/L)                         | -0.004                                   | (-0.007, -0.000) | 0.033  | 0.059                    | 0.028                    |
| 18:2, linoleic acid (mmol/L)                                | 0.068                                    | (0.015, 0.120)   | 0.011  | 0.024                    | 0.458                    |
| Omega3 fatty acids (mmol/L)                                 | -0.008                                   | (-0.018, 0.001)  | 0.083  | 0.128                    | 0.084                    |
| Omega6 fatty acids (mmol/L)                                 | 0.031                                    | (-0.024, 0.087)  | 0.271  | 0.352                    | 0.485                    |
| Polyunsat. fatty acids (mmol/L)                             | 0.023                                    | (-0.041, 0.086)  | 0.483  | 0.567                    | 0.553                    |
| Monounsat. fatty acids; 16:1, 18:1 (mmol/L)                 | 0.105                                    | (0.034, 0.176)   | 0.004  | 0.009                    | 0.623                    |
| Saturated fatty acids (mmol/L)                              | 0.073                                    | (-0.000, 0.146)  | 0.052  | 0.085                    | 0.638                    |
| <b>Fatty acid ratios</b>                                    |                                          |                  |        |                          |                          |
| Ratio of 22:6 docosahexaenoic acid to total fatty acids (%) | -0.049                                   | (-0.078, -0.019) | 0.001  | 0.003                    | 0.255                    |
| Ratio of 18:2 linoleic acid to total fatty acids (%)        | 0.197                                    | (-0.173, 0.567)  | 0.297  | 0.379                    | 3.233                    |
| Ratio of omega3 fatty acids to total fatty acids (%)        | -0.145                                   | (-0.213, -0.078) | <0.001 | 0.000                    | 0.593                    |
| Ratio of omega6 fatty acids to total fatty acids (%)        | -0.302                                   | (-0.658, 0.054)  | 0.096  | 0.142                    | 3.109                    |
| Ratio of polyunsat. fatty acids to total fatty acids (%)    | -0.447                                   | (-0.830, -0.065) | 0.022  | 0.042                    | 3.346                    |
| Ratio of monounsat. fatty acids to total fatty acids (%)    | 0.499                                    | (0.202, 0.796)   | 0.001  | 0.003                    | 2.606                    |
| Ratio of saturated fatty acids to total fatty acids (%)     | -0.051                                   | (-0.251, 0.148)  | 0.614  | 0.689                    | 1.743                    |
| <b>Glycolysis related</b>                                   |                                          |                  |        |                          |                          |
| Glucose (mmol/L)*                                           | -0.013                                   | (-0.026, 0.001)  | 0.061  | 0.098                    | 0.118                    |
| Lactate (mmol/L)                                            | -0.045                                   | (-0.097, 0.007)  | 0.088  | 0.133                    | 0.456                    |
| Pyruvate (mmol/L)                                           | -0.001                                   | (-0.004, 0.002)  | 0.524  | 0.606                    | 0.024                    |
| Citrate (mmol/L)                                            | 0.007                                    | (0.005, 0.009)   | <0.001 | <0.001                   | 0.018                    |
| Glycerol (mmol/L)                                           | 0.006                                    | (0.002, 0.010)   | 0.004  | 0.009                    | 0.023                    |
| <b>Amino acids</b>                                          |                                          |                  |        |                          |                          |
| Alanine (mmol/L)                                            | 0.011                                    | (0.004, 0.017)   | 0.002  | 0.004                    | 0.058                    |
| Glutamine (mmol/L)                                          | 0.023                                    | (0.018, 0.029)   | <0.001 | <0.001                   | 0.051                    |
| Glycine (mmol/L)                                            | 0.010                                    | (0.006, 0.014)   | <0.001 | <0.001                   | 0.032                    |
| Histidine (mmol/L)                                          | 0.001                                    | (-0.000, 0.002)  | 0.075  | 0.118                    | 0.008                    |
| Isoleucine (mmol/L)                                         | 0.000                                    | (-0.003, 0.002)  | 0.637  | 0.693                    | 0.018                    |

|    |                                                           |        |                  |       |       |       |
|----|-----------------------------------------------------------|--------|------------------|-------|-------|-------|
| 1  | Leucine (mmol/L)                                          | -0.002 | (-0.005, -0.000) | 0.022 | 0.041 | 0.018 |
| 2  | Valine (mmol/L)                                           | -0.007 | (-0.011, -0.003) | 0.001 | 0.003 | 0.036 |
| 3  | Phenylalanine (mmol/L)                                    | -0.002 | (-0.003, -0.001) | 0.003 | 0.007 | 0.009 |
| 4  | Tyrosine (mmol/L)                                         | 0.000  | (-0.001, 0.002)  | 0.582 | 0.663 | 0.014 |
| 5  | <b>Ketone bodies</b>                                      |        |                  |       |       |       |
| 6  | Acetate (mmol/L)*                                         | -0.030 | (-0.048, -0.011) | 0.002 | 0.005 | 0.166 |
| 7  | Acetoacetate (mmol/L)*                                    | -0.058 | (-0.172, 0.055)  | 0.313 | 0.393 | 0.992 |
| 8  | 3hydroxybutyrate (mmol/L)*                                | 0.041  | (-0.019, 0.101)  | 0.178 | 0.248 | 0.513 |
| 9  | <b>Fluid balance</b>                                      |        |                  |       |       |       |
| 10 | Albumin (signal area)                                     | -0.001 | (-0.001, -0.000) | 0.037 | 0.064 | 0.005 |
| 11 | Creatinine (mmol/L)                                       | 0.000  | (-0.001, 0.001)  | 0.624 | 0.690 | 0.007 |
| 12 | <b>Inflammation</b>                                       |        |                  |       |       |       |
| 13 | Glycoprotein acetyls, mainly a1acid glycoprotein (mmol/L) | 0.017  | (-0.004, 0.038)  | 0.104 | 0.151 | 0.183 |

\* Metabolite has been log transformed

^ Benjamini-Hochberg adjusted p-value

# Associations for children in Figure 3 are presented in SD-units. The conversion factor provided (unweighted standard deviation of each metabolite measure in children) can be used to convert the association in absolute concentration to SD units by dividing by the conversion factor.

Where metabolite has been log transformed conversion factor is standard deviation of log transformed metabolite

Supplementary table 4: Differences in mean metabolite levels in female compared to male adults in absolute concentration units.

| Metabolic subgroup                                          | Differences for adults (Female - Male) |                  |        |              |                          |
|-------------------------------------------------------------|----------------------------------------|------------------|--------|--------------|--------------------------|
|                                                             | Estimate                               | 95% CI           | pvalue | Adj_p-value^ | Conversion factor (SD) # |
| <b>Lipoprotein subclass lipids</b>                          |                                        |                  |        |              |                          |
| Total lipids in chylomicrons & ex.large VLDL (mmol/L)*      | -0.930                                 | (-1.271, -0.589) | <0.001 | <0.001       | 2.173                    |
| Total lipids in very large VLDL (mmol/L)*                   | -1.217                                 | (-1.617, -0.818) | <0.001 | <0.001       | 2.555                    |
| Total lipids in large VLDL (mmol/L)*                        | -0.900                                 | (-1.107, -0.693) | <0.001 | <0.001       | 1.343                    |
| Total lipids in medium VLDL (mmol/L)                        | -0.325                                 | (-0.385, -0.264) | <0.001 | <0.001       | 0.398                    |
| Total lipids in small VLDL (mmol/L)                         | -0.167                                 | (-0.201, -0.133) | <0.001 | <0.001       | 0.223                    |
| Total lipids in very small VLDL (mmol/L)                    | -0.022                                 | (-0.039, -0.005) | 0.013  | 0.018        | 0.107                    |
| Total lipids in IDL (mmol/L)                                | 0.014                                  | (-0.023, 0.051)  | 0.465  | 0.530        | 0.236                    |
| Total lipids in large LDL (mmol/L)                          | -0.011                                 | (-0.058, 0.035)  | 0.634  | 0.671        | 0.293                    |
| Total lipids in medium LDL (mmol/L)                         | -0.028                                 | (-0.057, 0.001)  | 0.058  | 0.076        | 0.182                    |
| Total lipids in small LDL (mmol/L)                          | -0.017                                 | (-0.035, 0.001)  | 0.061  | 0.079        | 0.113                    |
| Total lipids in very large HDL (mmol/L)                     | 0.195                                  | (0.158, 0.231)   | <0.001 | <0.001       | 0.239                    |
| Total lipids in large HDL (mmol/L)                          | 0.395                                  | (0.334, 0.455)   | <0.001 | <0.001       | 0.405                    |
| Total lipids in medium HDL (mmol/L)                         | 0.129                                  | (0.101, 0.158)   | <0.001 | <0.001       | 0.184                    |
| Total lipids in small HDL (mmol/L)                          | 0.002                                  | (-0.021, 0.025)  | 0.850  | 0.874        | 0.145                    |
| <b>Lipoprotein particle size</b>                            |                                        |                  |        |              |                          |
| Mean diameter for VLDL particles (nm)                       | -1.414                                 | (-1.669, -1.159) | <0.001 | <0.001       | 1.678                    |
| Mean diameter for LDL particles (nm)                        | 0.081                                  | (0.066, 0.096)   | <0.001 | <0.001       | 0.100                    |
| Mean diameter for HDL particles (nm)                        | 0.278                                  | (0.236, 0.320)   | <0.001 | <0.001       | 0.279                    |
| <b>Cholesterol</b>                                          |                                        |                  |        |              |                          |
| Serum total cholesterol (mmol/L)                            | 0.112                                  | (-0.018, 0.241)  | 0.091  | 0.116        | 0.817                    |
| Total cholesterol in VLDL (mmol/L)                          | -0.187                                 | (-0.230, -0.145) | <0.001 | <0.001       | 0.275                    |
| Remnant cholesterol (nonHDL, nonLDL cholesterol) (mmol/L)   | -0.184                                 | (-0.244, -0.124) | <0.001 | <0.001       | 0.383                    |
| Total cholesterol in LDL (mmol/L)                           | -0.048                                 | (-0.117, 0.021)  | 0.175  | 0.213        | 0.437                    |
| Total cholesterol in HDL (mmol/L)                           | 0.344                                  | (0.286, 0.401)   | <0.001 | <0.001       | 0.382                    |
| Total cholesterol in HDL2 (mmol/L)                          | 0.324                                  | (0.271, 0.378)   | <0.001 | <0.001       | 0.354                    |
| Total cholesterol in HDL3 (mmol/L)                          | 0.019                                  | (0.014, 0.025)   | <0.001 | <0.001       | 0.034                    |
| Esterified cholesterol (mmol/L)                             | 0.070                                  | (-0.023, 0.163)  | 0.139  | 0.172        | 0.586                    |
| Free cholesterol (mmol/L)                                   | 0.046                                  | (0.009, 0.084)   | 0.016  | 0.023        | 0.238                    |
| <b>Glycerides and phospholipids</b>                         |                                        |                  |        |              |                          |
| Serum total triglycerides (mmol/L)*                         | -0.344                                 | (-0.416, -0.273) | <0.001 | <0.001       | 0.468                    |
| Triglycerides in VLDL (mmol/L)*                             | -0.530                                 | (-0.630, -0.429) | <0.001 | <0.001       | 0.659                    |
| Triglycerides in LDL (mmol/L)                               | 0.008                                  | (0.001, 0.014)   | 0.033  | 0.044        | 0.044                    |
| Triglycerides in HDL (mmol/L)                               | -0.004                                 | (-0.010, 0.002)  | 0.228  | 0.272        | 0.040                    |
| Total phosphoglycerides (mmol/L)                            | 0.106                                  | (0.052, 0.159)   | <0.001 | <0.001       | 0.340                    |
| Ratio of triglycerides to phosphoglycerides                 | -0.289                                 | (-0.337, -0.241) | <0.001 | <0.001       | 0.318                    |
| Phosphatidylcholine & other cholines (mmol/L)               | 0.138                                  | (0.086, 0.190)   | <0.001 | <0.001       | 0.331                    |
| Sphingomyelins (mmol/L)                                     | 0.032                                  | (0.020, 0.045)   | <0.001 | <0.001       | 0.078                    |
| Total cholines (mmol/L)                                     | 0.170                                  | (0.115, 0.224)   | <0.001 | <0.001       | 0.349                    |
| <b>Apolipoproteins</b>                                      |                                        |                  |        |              |                          |
| Apolipoprotein A1 (g/L)                                     | 0.146                                  | (0.114, 0.178)   | <0.001 | <0.001       | 0.209                    |
| Apolipoprotein B (g/L)                                      | -0.115                                 | (-0.146, -0.084) | <0.001 | <0.001       | 0.198                    |
| Ratio of apolipoprotein B to apolipoprotein A1              | -0.126                                 | (-0.148, -0.105) | <0.001 | <0.001       | 0.144                    |
| <b>Fatty acids</b>                                          |                                        |                  |        |              |                          |
| Total fatty acids (mmol/L)                                  | -0.711                                 | (-1.091, -0.330) | <0.001 | <0.001       | 2.388                    |
| Estimated degree of unsaturation                            | 0.031                                  | (0.021, 0.042)   | <0.001 | <0.001       | 0.066                    |
| 22:6, docosahexaenoic acid (mmol/L)                         | -0.002                                 | (-0.008, 0.005)  | 0.622  | 0.667        | 0.041                    |
| 18:2, linoleic acid (mmol/L)                                | 0.004                                  | (-0.087, 0.094)  | 0.934  | 0.947        | 0.566                    |
| Omega3 fatty acids (mmol/L)                                 | -0.035                                 | (-0.054, -0.016) | <0.001 | 0.001        | 0.122                    |
| Omega6 fatty acids (mmol/L)                                 | 0.004                                  | (-0.094, 0.102)  | 0.936  | 0.936        | 0.612                    |
| Polyunsat. fatty acids (mmol/L)                             | -0.031                                 | (-0.144, 0.082)  | 0.592  | 0.644        | 0.708                    |
| Monounsatur. fatty acids; 16:1, 18:1 (mmol/L)               | -0.372                                 | (-0.520, -0.225) | <0.001 | <0.001       | 0.930                    |
| Saturated fatty acids (mmol/L)                              | -0.307                                 | (-0.455, -0.159) | <0.001 | <0.001       | 0.932                    |
| <b>Fatty acid ratios</b>                                    |                                        |                  |        |              |                          |
| Ratio of 22:6 docosahexaenoic acid to total fatty acids (%) | 0.064                                  | (0.018, 0.110)   | 0.006  | 0.009        | 0.288                    |
| Ratio of 18:2 linoleic acid to total fatty acids (%)        | 1.527                                  | (0.984, 2.070)   | <0.001 | <0.001       | 3.430                    |
| Ratio of omega3 fatty acids to total fatty acids (%)        | -0.038                                 | (-0.152, 0.075)  | 0.508  | 0.570        | 0.710                    |
| Ratio of omega6 fatty acids to total fatty acids (%)        | 1.882                                  | (1.351, 2.412)   | <0.001 | <0.001       | 3.376                    |
| Ratio of polyunsatur. fatty acids to total fatty acids (%)  | 1.843                                  | (1.272, 2.414)   | <0.001 | <0.001       | 3.621                    |
| Ratio of monounsatur. fatty acids to total fatty acids (%)  | -1.456                                 | (-1.914, -0.998) | <0.001 | <0.001       | 2.904                    |
| Ratio of saturated fatty acids to total fatty acids (%)     | -0.387                                 | (-0.700, -0.074) | 0.015  | 0.022        | 1.959                    |
| <b>Glycolysis related</b>                                   |                                        |                  |        |              |                          |
| Glucose (mmol/L)*                                           | -0.071                                 | (-0.097, -0.044) | <0.001 | <0.001       | 0.168                    |
| Lactate (mmol/L)                                            | -0.178                                 | (-0.252, -0.105) | <0.001 | <0.001       | 0.469                    |
| Pyruvate (mmol/L)                                           | -0.007                                 | (-0.013, -0.002) | 0.004  | 0.006        | 0.032                    |

|    |                                                           |        |                  |        |        |       |
|----|-----------------------------------------------------------|--------|------------------|--------|--------|-------|
| 1  | Citrate (mmol/L)                                          | -0.001 | (-0.004, 0.001)  | 0.335  | 0.387  | 0.016 |
| 2  | Glycerol (mmol/L)                                         | -0.003 | (-0.008, 0.002)  | 0.279  | 0.328  | 0.022 |
| 3  |                                                           |        |                  |        |        |       |
| 4  | <b>Amino acids</b>                                        |        |                  |        |        |       |
| 5  | Alanine (mmol/L)                                          | -0.020 | (-0.030, -0.011) | <0.001 | <0.001 | 0.060 |
| 6  | Glutamine (mmol/L)                                        | -0.038 | (-0.048, -0.028) | <0.001 | <0.001 | 0.065 |
| 7  | Glycine (mmol/L)                                          | 0.029  | (0.020, 0.038)   | <0.001 | <0.001 | 0.059 |
| 8  | Histidine (mmol/L)                                        | -0.001 | (-0.003, 0.000)  | 0.116  | 0.146  | 0.009 |
| 9  | Isoleucine (mmol/L)                                       | -0.016 | (-0.019, -0.013) | <0.001 | <0.001 | 0.021 |
| 10 | Leucine (mmol/L)                                          | -0.019 | (-0.022, -0.016) | <0.001 | <0.001 | 0.022 |
| 11 | Valine (mmol/L)                                           | -0.029 | (-0.035, -0.022) | <0.001 | <0.001 | 0.042 |
| 12 | Phenylalanine (mmol/L)                                    | 0.000  | (-0.002, 0.001)  | 0.576  | 0.637  | 0.010 |
| 13 | Tyrosine (mmol/L)                                         | -0.005 | (-0.007, -0.003) | <0.001 | <0.001 | 0.014 |
| 14 |                                                           |        |                  |        |        |       |
| 15 | <b>Ketone bodies</b>                                      |        |                  |        |        |       |
| 16 | Acetate (mmol/L)*                                         | -0.076 | (-0.119, -0.033) | 0.001  | 0.001  | 0.273 |
| 17 | Acetoacetate (mmol/L)*                                    | 0.018  | (-0.148, 0.184)  | 0.828  | 0.863  | 1.048 |
| 18 | 3hydroxybutyrate (mmol/L)*                                | -0.087 | (-0.163, -0.011) | 0.025  | 0.035  | 0.472 |
| 19 |                                                           |        |                  |        |        |       |
| 20 | <b>Fluid balance</b>                                      |        |                  |        |        |       |
| 21 | Albumin (signal area)                                     | -0.002 | (-0.002, -0.001) | <0.001 | <0.001 | 0.005 |
| 22 | Creatinine (mmol/L)                                       | -0.013 | (-0.015, -0.012) | <0.001 | <0.001 | 0.010 |
| 23 |                                                           |        |                  |        |        |       |
| 24 | <b>Inflammation</b>                                       |        |                  |        |        |       |
| 25 | Glycoprotein acetyls, mainly a1acid glycoprotein (mmol/L) | -0.098 | (-0.136, -0.061) | <0.001 | <0.001 | 0.239 |

\* Metabolite has been log transformed

^ Benjamini-Hochberg adjusted p-value

# Associations for parents in Figure 3 are presented in SD-units. The conversion factor provided (unweighted standard deviation of each metabolite measure in adults/parents) can be used to convert the association in absolute concentration to SD units by dividing by the conversion factor.

Where metabolite has been log transformed conversion factor is standard deviation of log transformed metabolite

Supplementary table 5: Mother-child concordance; correlations and partial correlations between mothers and their sons, daughters and all children.

| Metabolic subgroup                                          | Mother |      |           |     |      |           |       |      |           |     |      |           |              |      |           |     |      |           |  |
|-------------------------------------------------------------|--------|------|-----------|-----|------|-----------|-------|------|-----------|-----|------|-----------|--------------|------|-----------|-----|------|-----------|--|
|                                                             | Boys   |      |           |     |      |           | Girls |      |           |     |      |           | All Children |      |           |     |      |           |  |
|                                                             | n      | CC   | 95% CI    | n   | PCC* | 95% CI    | n     | CC   | 95% CI    | n   | PCC* | 95% CI    | n            | CC   | 95% CI    | n   | PCC* | 95% CI    |  |
| <b>Lipoprotein subclass lipids</b>                          |        |      |           |     |      |           |       |      |           |     |      |           |              |      |           |     |      |           |  |
| Total lipids in chylomicrons & ex.large VLDL (mmol/L)*      | 469    | 0.22 | 0.13-0.30 | 433 | 0.23 | 0.14-0.31 | 518   | 0.24 | 0.16-0.32 | 476 | 0.21 | 0.12-0.29 | 987          | 0.23 | 0.17-0.29 | 909 | 0.22 | 0.16-0.28 |  |
| Total lipids in very large VLDL (mmol/L)*                   | 469    | 0.25 | 0.16-0.33 | 433 | 0.25 | 0.16-0.34 | 518   | 0.22 | 0.14-0.30 | 476 | 0.20 | 0.12-0.29 | 987          | 0.24 | 0.18-0.29 | 909 | 0.23 | 0.17-0.29 |  |
| Total lipids in large VLDL (mmol/L)*                        | 469    | 0.22 | 0.13-0.30 | 433 | 0.24 | 0.15-0.33 | 518   | 0.23 | 0.14-0.31 | 476 | 0.22 | 0.14-0.31 | 987          | 0.22 | 0.16-0.28 | 909 | 0.23 | 0.17-0.29 |  |
| Total lipids in medium VLDL (mmol/L)                        | 469    | 0.26 | 0.17-0.34 | 433 | 0.28 | 0.19-0.36 | 518   | 0.29 | 0.21-0.37 | 476 | 0.30 | 0.21-0.38 | 987          | 0.28 | 0.22-0.34 | 909 | 0.29 | 0.23-0.35 |  |
| Total lipids in small VLDL (mmol/L)                         | 469    | 0.26 | 0.18-0.35 | 433 | 0.28 | 0.19-0.36 | 518   | 0.30 | 0.21-0.37 | 476 | 0.30 | 0.21-0.38 | 987          | 0.29 | 0.23-0.34 | 909 | 0.29 | 0.23-0.35 |  |
| Total lipids in very small VLDL (mmol/L)                    | 469    | 0.22 | 0.14-0.31 | 433 | 0.21 | 0.12-0.30 | 518   | 0.26 | 0.17-0.34 | 476 | 0.26 | 0.18-0.35 | 987          | 0.25 | 0.19-0.30 | 909 | 0.25 | 0.18-0.31 |  |
| Total lipids in IDL (mmol/L)                                | 469    | 0.27 | 0.18-0.35 | 433 | 0.23 | 0.14-0.32 | 518   | 0.29 | 0.21-0.37 | 476 | 0.31 | 0.23-0.39 | 987          | 0.29 | 0.23-0.34 | 909 | 0.28 | 0.22-0.34 |  |
| Total lipids in large LDL (mmol/L)                          | 469    | 0.28 | 0.19-0.36 | 433 | 0.24 | 0.15-0.33 | 518   | 0.30 | 0.22-0.37 | 476 | 0.32 | 0.24-0.40 | 987          | 0.29 | 0.23-0.35 | 909 | 0.29 | 0.23-0.35 |  |
| Total lipids in medium LDL (mmol/L)                         | 469    | 0.28 | 0.20-0.36 | 433 | 0.24 | 0.15-0.33 | 518   | 0.29 | 0.21-0.37 | 476 | 0.32 | 0.24-0.40 | 987          | 0.29 | 0.23-0.35 | 909 | 0.29 | 0.23-0.35 |  |
| Total lipids in small LDL (mmol/L)                          | 469    | 0.28 | 0.19-0.36 | 433 | 0.24 | 0.15-0.32 | 518   | 0.29 | 0.21-0.37 | 476 | 0.32 | 0.23-0.40 | 987          | 0.28 | 0.23-0.34 | 909 | 0.28 | 0.22-0.34 |  |
| Total lipids in very large HDL (mmol/L)                     | 469    | 0.30 | 0.22-0.38 | 433 | 0.30 | 0.22-0.39 | 518   | 0.32 | 0.24-0.39 | 476 | 0.30 | 0.21-0.38 | 987          | 0.31 | 0.25-0.36 | 909 | 0.30 | 0.24-0.36 |  |
| Total lipids in large HDL (mmol/L)                          | 469    | 0.31 | 0.23-0.39 | 433 | 0.31 | 0.23-0.40 | 518   | 0.28 | 0.20-0.36 | 476 | 0.26 | 0.18-0.34 | 987          | 0.30 | 0.24-0.35 | 909 | 0.29 | 0.23-0.35 |  |
| Total lipids in medium HDL (mmol/L)                         | 469    | 0.22 | 0.13-0.30 | 433 | 0.20 | 0.11-0.29 | 518   | 0.12 | 0.03-0.20 | 476 | 0.13 | 0.04-0.22 | 987          | 0.17 | 0.11-0.23 | 909 | 0.17 | 0.10-0.23 |  |
| Total lipids in small HDL (mmol/L)                          | 469    | 0.23 | 0.14-0.31 | 433 | 0.22 | 0.13-0.31 | 518   | 0.20 | 0.12-0.29 | 476 | 0.20 | 0.11-0.28 | 987          | 0.21 | 0.15-0.27 | 909 | 0.21 | 0.15-0.27 |  |
| <b>Lipoprotein particle size</b>                            |        |      |           |     |      |           |       |      |           |     |      |           |              |      |           |     |      |           |  |
| Mean diameter for VLDL particles (nm)                       | 469    | 0.30 | 0.22-0.38 | 433 | 0.32 | 0.23-0.40 | 518   | 0.27 | 0.19-0.35 | 476 | 0.25 | 0.16-0.33 | 987          | 0.29 | 0.23-0.35 | 909 | 0.28 | 0.22-0.34 |  |
| Mean diameter for LDL particles (nm)                        | 469    | 0.22 | 0.13-0.31 | 433 | 0.20 | 0.11-0.29 | 518   | 0.30 | 0.22-0.38 | 476 | 0.32 | 0.24-0.40 | 987          | 0.26 | 0.20-0.31 | 909 | 0.26 | 0.20-0.32 |  |
| Mean diameter for HDL particles (nm)                        | 469    | 0.32 | 0.23-0.40 | 433 | 0.32 | 0.23-0.40 | 518   | 0.33 | 0.26-0.41 | 476 | 0.31 | 0.23-0.39 | 987          | 0.33 | 0.27-0.38 | 909 | 0.31 | 0.25-0.37 |  |
| <b>Cholesterol</b>                                          |        |      |           |     |      |           |       |      |           |     |      |           |              |      |           |     |      |           |  |
| Serum total cholesterol (mmol/L)                            | 469    | 0.27 | 0.19-0.35 | 433 | 0.23 | 0.14-0.32 | 518   | 0.32 | 0.24-0.39 | 476 | 0.34 | 0.26-0.42 | 987          | 0.30 | 0.24-0.35 | 909 | 0.30 | 0.24-0.35 |  |
| Total cholesterol in VLDL (mmol/L)                          | 469    | 0.25 | 0.17-0.34 | 433 | 0.27 | 0.18-0.36 | 518   | 0.29 | 0.21-0.36 | 476 | 0.29 | 0.21-0.37 | 987          | 0.28 | 0.22-0.33 | 909 | 0.29 | 0.23-0.35 |  |
| Remnant cholesterol (nonHDL, nonLDL cholesterol) (mmol/L)   | 469    | 0.25 | 0.17-0.34 | 433 | 0.26 | 0.17-0.34 | 518   | 0.29 | 0.21-0.37 | 476 | 0.31 | 0.22-0.39 | 987          | 0.28 | 0.22-0.34 | 909 | 0.29 | 0.23-0.35 |  |
| Total cholesterol in LDL (mmol/L)                           | 469    | 0.28 | 0.20-0.36 | 433 | 0.24 | 0.15-0.33 | 518   | 0.29 | 0.21-0.37 | 476 | 0.32 | 0.23-0.40 | 987          | 0.29 | 0.23-0.34 | 909 | 0.29 | 0.23-0.35 |  |
| Total cholesterol in HDL (mmol/L)                           | 469    | 0.30 | 0.22-0.38 | 433 | 0.30 | 0.22-0.39 | 518   | 0.25 | 0.16-0.33 | 476 | 0.23 | 0.15-0.32 | 987          | 0.28 | 0.22-0.33 | 909 | 0.27 | 0.20-0.33 |  |
| Total cholesterol in very large HDL (mmol/L)                | 469    | 0.30 | 0.22-0.38 | 433 | 0.31 | 0.22-0.39 | 518   | 0.25 | 0.16-0.32 | 476 | 0.23 | 0.15-0.32 | 987          | 0.28 | 0.22-0.33 | 909 | 0.27 | 0.21-0.33 |  |
| Total cholesterol in HDL3 (mmol/L)                          | 469    | 0.25 | 0.16-0.33 | 433 | 0.23 | 0.14-0.32 | 518   | 0.25 | 0.16-0.33 | 476 | 0.24 | 0.16-0.33 | 987          | 0.25 | 0.19-0.31 | 909 | 0.24 | 0.17-0.30 |  |
| Esterified cholesterol (mmol/L)                             | 465    | 0.28 | 0.19-0.36 | 430 | 0.23 | 0.14-0.32 | 518   | 0.32 | 0.24-0.39 | 476 | 0.34 | 0.26-0.42 | 983          | 0.30 | 0.24-0.35 | 906 | 0.29 | 0.23-0.35 |  |
| Free cholesterol (mmol/L)                                   | 465    | 0.26 | 0.18-0.34 | 430 | 0.22 | 0.13-0.31 | 518   | 0.32 | 0.24-0.40 | 476 | 0.35 | 0.27-0.43 | 983          | 0.30 | 0.24-0.35 | 906 | 0.30 | 0.24-0.35 |  |
| <b>Glycerides and phospholipids</b>                         |        |      |           |     |      |           |       |      |           |     |      |           |              |      |           |     |      |           |  |
| Serum total triglycerides (mmol/L)*                         | 469    | 0.28 | 0.20-0.36 | 433 | 0.30 | 0.21-0.38 | 518   | 0.29 | 0.21-0.37 | 476 | 0.29 | 0.20-0.37 | 987          | 0.29 | 0.23-0.35 | 909 | 0.30 | 0.24-0.36 |  |
| Total triglycerides in VLDL (mmol/L)*                       | 469    | 0.30 | 0.22-0.38 | 433 | 0.31 | 0.23-0.40 | 518   | 0.28 | 0.20-0.36 | 476 | 0.27 | 0.18-0.35 | 987          | 0.29 | 0.23-0.35 | 909 | 0.29 | 0.23-0.35 |  |
| Triglycerides in LDL (mmol/L)                               | 469    | 0.19 | 0.10-0.28 | 433 | 0.18 | 0.09-0.27 | 518   | 0.26 | 0.18-0.34 | 476 | 0.27 | 0.18-0.35 | 987          | 0.23 | 0.17-0.29 | 909 | 0.23 | 0.17-0.29 |  |
| Triglycerides in HDL (mmol/L)                               | 469    | 0.21 | 0.12-0.30 | 433 | 0.23 | 0.14-0.32 | 518   | 0.26 | 0.18-0.34 | 476 | 0.26 | 0.18-0.34 | 987          | 0.24 | 0.18-0.30 | 909 | 0.25 | 0.19-0.31 |  |
| Total phosphoglycerides (mmol/L)                            | 465    | 0.26 | 0.17-0.34 | 430 | 0.23 | 0.14-0.32 | 518   | 0.26 | 0.17-0.34 | 476 | 0.27 | 0.18-0.35 | 983          | 0.26 | 0.20-0.32 | 906 | 0.25 | 0.18-0.31 |  |
| Ratio of triglycerides to phosphoglycerides                 | 465    | 0.23 | 0.15-0.32 | 430 | 0.26 | 0.16-0.34 | 518   | 0.26 | 0.18-0.34 | 476 | 0.27 | 0.19-0.35 | 983          | 0.25 | 0.20-0.31 | 906 | 0.27 | 0.20-0.33 |  |
| Phosphatidylcholine & other cholinols (mmol/L)              | 465    | 0.27 | 0.18-0.35 | 430 | 0.24 | 0.14-0.32 | 518   | 0.25 | 0.17-0.33 | 476 | 0.27 | 0.18-0.35 | 983          | 0.26 | 0.20-0.32 | 906 | 0.25 | 0.19-0.31 |  |
| Sphingomyelins (mmol/L)                                     | 465    | 0.23 | 0.15-0.32 | 430 | 0.22 | 0.12-0.30 | 518   | 0.29 | 0.21-0.37 | 476 | 0.31 | 0.23-0.39 | 983          | 0.27 | 0.21-0.32 | 906 | 0.27 | 0.21-0.33 |  |
| Total cholinols (mmol/L)                                    | 465    | 0.27 | 0.18-0.35 | 430 | 0.23 | 0.14-0.32 | 518   | 0.28 | 0.20-0.35 | 476 | 0.28 | 0.20-0.37 | 983          | 0.27 | 0.21-0.33 | 906 | 0.26 | 0.20-0.32 |  |
| <b>Apolipoproteins</b>                                      |        |      |           |     |      |           |       |      |           |     |      |           |              |      |           |     |      |           |  |
| Apolipoprotein A1 (g/L)                                     | 469    | 0.28 | 0.20-0.36 | 433 | 0.26 | 0.17-0.35 | 518   | 0.26 | 0.18-0.34 | 476 | 0.26 | 0.17-0.34 | 987          | 0.27 | 0.21-0.33 | 909 | 0.26 | 0.20-0.32 |  |
| Apolipoprotein B (g/L)                                      | 469    | 0.26 | 0.18-0.35 | 433 | 0.27 | 0.18-0.35 | 517   | 0.30 | 0.22-0.38 | 475 | 0.32 | 0.24-0.40 | 986          | 0.29 | 0.23-0.35 | 908 | 0.31 | 0.25-0.36 |  |
| Ratio of apolipoprotein B to apolipoprotein A1              | 469    | 0.28 | 0.20-0.36 | 433 | 0.30 | 0.21-0.38 | 517   | 0.25 | 0.17-0.33 | 475 | 0.25 | 0.16-0.33 | 986          | 0.27 | 0.21-0.33 | 908 | 0.28 | 0.22-0.34 |  |
| <b>Fatty acids</b>                                          |        |      |           |     |      |           |       |      |           |     |      |           |              |      |           |     |      |           |  |
| Total fatty acids (mmol/L)                                  | 462    | 0.22 | 0.13-0.30 | 427 | 0.22 | 0.13-0.31 | 517   | 0.31 | 0.23-0.39 | 475 | 0.33 | 0.25-0.41 | 979          | 0.27 | 0.22-0.33 | 902 | 0.29 | 0.22-0.34 |  |
| Estimated degree of unsaturation                            | 462    | 0.30 | 0.22-0.38 | 427 | 0.32 | 0.23-0.41 | 517   | 0.27 | 0.19-0.35 | 475 | 0.24 | 0.16-0.33 | 979          | 0.29 | 0.23-0.34 | 902 | 0.28 | 0.22-0.34 |  |
| 22:6, docosahexaenoic acid (mmol/L)                         | 462    | 0.20 | 0.11-0.29 | 427 | 0.18 | 0.09-0.27 | 517   | 0.34 | 0.26-0.41 | 475 | 0.32 | 0.24-0.40 | 979          | 0.27 | 0.21-0.32 | 902 | 0.25 | 0.19-0.31 |  |
| 18:2, linoleic acid (mmol/L)                                | 462    | 0.22 | 0.13-0.31 | 427 | 0.22 | 0.13-0.31 | 517   | 0.27 | 0.19-0.35 | 475 | 0.30 | 0.21-0.38 | 979          | 0.25 | 0.19-0.31 | 902 | 0.27 | 0.21-0.33 |  |
| Omega3 fatty acids (mmol/L)                                 | 462    | 0.20 | 0.11-0.29 | 427 | 0.19 | 0.09-0.28 | 517   | 0.34 | 0.27-0.42 | 475 | 0.34 | 0.26-0.42 | 979          | 0.27 | 0.21-0.33 | 902 | 0.26 | 0.20-0.32 |  |
| Omega6 fatty acids (mmol/L)                                 | 462    | 0.23 | 0.14-0.32 | 427 | 0.22 | 0.13-0.31 | 517   | 0.31 | 0.23-0.38 | 475 | 0.33 | 0.25-0.41 | 979          | 0.27 | 0.21-0.33 | 902 | 0.28 | 0.22-0.34 |  |
| Polysat. fatty acids (mmol/L)                               | 462    | 0.23 | 0.14-0.31 | 427 | 0.22 | 0.12-0.30 | 517   | 0.32 | 0.24-0.39 | 475 | 0.34 | 0.26-0.42 | 979          | 0.28 | 0.22-0.33 | 902 | 0.28 | 0.22-0.34 |  |
| Monounsat. fatty acids 16:1, 18:1 (mmol/L)                  | 462    | 0.24 | 0.15-0.33 | 427 | 0.25 | 0.16-0.34 | 517   | 0.33 | 0.25-0.40 | 475 | 0.33 | 0.25-0.41 | 979          | 0.29 | 0.24-0.35 | 902 | 0.30 | 0.24-0.36 |  |
| Saturated fatty acids (mmol/L)                              | 462    | 0.21 | 0.12-0.29 | 427 | 0.21 | 0.12-0.30 | 517   | 0.29 | 0.21-0.37 | 475 | 0.30 | 0.21-0.38 | 979          | 0.26 | 0.20-0.32 | 902 | 0.26 | 0.20-0.32 |  |
| <b>Fatty acid ratios</b>                                    |        |      |           |     |      |           |       |      |           |     |      |           |              |      |           |     |      |           |  |
| Ratio of 22:6 docosahexaenoic acid to total fatty acids (%) | 462    | 0.31 | 0.22-0.39 | 427 | 0.29 | 0.20-0.38 | 517   | 0.35 | 0.27-0.42 | 475 | 0.32 | 0.24-0.40 | 979          | 0.33 | 0.27-0.39 | 902 | 0.31 | 0.25-0.36 |  |
| Ratio of 18:2 linoleic acid to total fatty acids (%)        | 462    | 0.13 | 0.04-0.22 | 427 | 0.15 | 0.06-0.24 | 517   | 0.20 | 0.11-0.28 | 475 | 0.16 | 0.08-0.25 | 979          | 0.17 | 0.11-0.23 | 902 | 0.16 | 0.09-0.22 |  |
| Ratio of omega3 fatty acids to total fatty acids (%)        | 462    | 0.32 | 0.24-0.40 | 427 | 0.32 | 0.23-0.40 | 517   | 0.40 | 0.33-0.47 | 475 | 0.37 | 0.29-0.44 | 979          | 0.36 | 0.31-0.41 | 902 | 0.34 | 0.28-0.39 |  |
| Ratio of omega6 fatty acids to total fatty acids (%)        | 462    | 0.23 | 0.15-0.32 | 427 | 0.26 | 0.17-0.35 | 517   | 0.25 | 0.17-0.33 | 475 | 0.22 | 0.13-0.30 | 979          | 0.24 | 0.18-0.30 | 902 | 0.24 | 0.17-0.30 |  |
| Ratio of polysat. fatty acids to total fatty acids (%)      | 462    | 0.27 | 0.19-0.36 | 427 | 0.30 | 0.21-0.38 | 517   | 0.28 | 0.20-0.36 | 475 | 0.24 | 0.16-0.33 | 979          | 0.28 | 0.22-0.33 | 902 | 0.27 | 0.20-     |  |

Supplementary table 6: Parent-child concordance, correlation and partial correlations between all parents and their sons, daughters and all children.

| Metabolic subgroup                                          | All Parents |      |             |     |      |              |     |      |             |     |              |             |      |      |             |      |      |             |
|-------------------------------------------------------------|-------------|------|-------------|-----|------|--------------|-----|------|-------------|-----|--------------|-------------|------|------|-------------|------|------|-------------|
|                                                             | Male Child  |      |             |     |      | Female Child |     |      |             |     | All Children |             |      |      |             |      |      |             |
|                                                             | n           | CC   | 95% CI      | n   | PCC* | 95% CI       | n   | CC   | 95% CI      | n   | CC           | 95% CI      | n    | PCC* | 95% CI      |      |      |             |
| <b>Lipoprotein subclass lipids</b>                          |             |      |             |     |      |              |     |      |             |     |              |             |      |      |             |      |      |             |
| Total lipids in chylomicrons & ex.large VLDL (mmol/L)*      | 547         | 0.22 | 0.14 - 0.30 | 505 | 0.23 | 0.14 - 0.31  | 586 | 0.20 | 0.12 - 0.28 | 544 | 0.17         | 0.08 - 0.25 | 1133 | 0.22 | 0.16 - 0.27 | 1049 | 0.20 | 0.15 - 0.26 |
| Total lipids in very large VLDL (mmol/L)*                   | 547         | 0.23 | 0.15 - 0.31 | 505 | 0.23 | 0.15 - 0.31  | 586 | 0.17 | 0.10 - 0.25 | 544 | 0.16         | 0.08 - 0.24 | 1133 | 0.21 | 0.15 - 0.26 | 1049 | 0.20 | 0.14 - 0.26 |
| Total lipids in large VLDL (mmol/L)*                        | 547         | 0.20 | 0.12 - 0.28 | 505 | 0.22 | 0.13 - 0.30  | 586 | 0.20 | 0.12 - 0.28 | 544 | 0.19         | 0.11 - 0.27 | 1133 | 0.20 | 0.15 - 0.26 | 1049 | 0.21 | 0.15 - 0.26 |
| Total lipids in medium VLDL (mmol/L)                        | 547         | 0.27 | 0.19 - 0.35 | 505 | 0.28 | 0.20 - 0.36  | 586 | 0.25 | 0.17 - 0.32 | 544 | 0.24         | 0.16 - 0.32 | 1133 | 0.26 | 0.21 - 0.31 | 1049 | 0.26 | 0.20 - 0.32 |
| Total lipids in small VLDL (mmol/L)                         | 547         | 0.27 | 0.19 - 0.34 | 505 | 0.27 | 0.19 - 0.35  | 586 | 0.26 | 0.18 - 0.33 | 544 | 0.26         | 0.17 - 0.33 | 1133 | 0.26 | 0.21 - 0.32 | 1049 | 0.26 | 0.21 - 0.32 |
| Total lipids in very small VLDL (mmol/L)                    | 547         | 0.23 | 0.15 - 0.31 | 505 | 0.22 | 0.13 - 0.30  | 586 | 0.25 | 0.17 - 0.33 | 544 | 0.26         | 0.18 - 0.34 | 1133 | 0.25 | 0.19 - 0.30 | 1049 | 0.24 | 0.19 - 0.30 |
| Total lipids in IDL (mmol/L)                                | 547         | 0.28 | 0.20 - 0.35 | 505 | 0.25 | 0.16 - 0.33  | 586 | 0.29 | 0.21 - 0.36 | 544 | 0.31         | 0.23 - 0.38 | 1133 | 0.29 | 0.23 - 0.34 | 1049 | 0.28 | 0.23 - 0.34 |
| Total lipids in large LDL (mmol/L)                          | 547         | 0.28 | 0.20 - 0.36 | 505 | 0.25 | 0.17 - 0.33  | 586 | 0.29 | 0.21 - 0.36 | 544 | 0.31         | 0.23 - 0.38 | 1133 | 0.29 | 0.23 - 0.34 | 1049 | 0.29 | 0.23 - 0.34 |
| Total lipids in medium LDL (mmol/L)                         | 547         | 0.29 | 0.21 - 0.36 | 505 | 0.25 | 0.17 - 0.33  | 586 | 0.28 | 0.21 - 0.36 | 544 | 0.31         | 0.23 - 0.38 | 1133 | 0.28 | 0.23 - 0.34 | 1049 | 0.29 | 0.23 - 0.34 |
| Total lipids in small LDL (mmol/L)                          | 547         | 0.28 | 0.20 - 0.35 | 505 | 0.24 | 0.16 - 0.32  | 586 | 0.28 | 0.20 - 0.35 | 544 | 0.31         | 0.23 - 0.38 | 1133 | 0.28 | 0.22 - 0.33 | 1049 | 0.28 | 0.22 - 0.33 |
| Total lipids in very large HDL (mmol/L)                     | 547         | 0.29 | 0.21 - 0.37 | 505 | 0.28 | 0.20 - 0.36  | 586 | 0.29 | 0.21 - 0.36 | 544 | 0.27         | 0.19 - 0.35 | 1133 | 0.29 | 0.24 - 0.34 | 1049 | 0.28 | 0.22 - 0.33 |
| Total lipids in large HDL (mmol/L)                          | 547         | 0.29 | 0.21 - 0.36 | 505 | 0.28 | 0.19 - 0.36  | 586 | 0.24 | 0.17 - 0.32 | 544 | 0.22         | 0.14 - 0.30 | 1133 | 0.27 | 0.21 - 0.32 | 1049 | 0.25 | 0.19 - 0.30 |
| Total lipids in medium HDL (mmol/L)                         | 547         | 0.15 | 0.07 - 0.24 | 505 | 0.13 | 0.04 - 0.21  | 586 | 0.10 | 0.02 - 0.18 | 544 | 0.10         | 0.02 - 0.19 | 1133 | 0.12 | 0.07 - 0.18 | 1049 | 0.11 | 0.05 - 0.17 |
| Total lipids in small HDL (mmol/L)                          | 547         | 0.19 | 0.10 - 0.27 | 505 | 0.16 | 0.08 - 0.25  | 586 | 0.18 | 0.10 - 0.26 | 544 | 0.17         | 0.09 - 0.25 | 1133 | 0.18 | 0.12 - 0.23 | 1049 | 0.17 | 0.11 - 0.22 |
| <b>Lipoprotein particle size</b>                            |             |      |             |     |      |              |     |      |             |     |              |             |      |      |             |      |      |             |
| Mean diameter for VLDL particles (nm)                       | 547         | 0.29 | 0.21 - 0.36 | 505 | 0.30 | 0.22 - 0.38  | 586 | 0.22 | 0.14 - 0.29 | 544 | 0.19         | 0.11 - 0.27 | 1133 | 0.25 | 0.20 - 0.31 | 1049 | 0.24 | 0.19 - 0.30 |
| Mean diameter for LDL particles (nm)                        | 547         | 0.19 | 0.11 - 0.27 | 505 | 0.17 | 0.08 - 0.25  | 586 | 0.27 | 0.19 - 0.34 | 544 | 0.29         | 0.21 - 0.36 | 1133 | 0.23 | 0.17 - 0.28 | 1049 | 0.23 | 0.17 - 0.28 |
| Mean diameter for HDL particles (nm)                        | 547         | 0.31 | 0.23 - 0.38 | 505 | 0.30 | 0.22 - 0.38  | 586 | 0.30 | 0.22 - 0.37 | 544 | 0.27         | 0.19 - 0.35 | 1133 | 0.30 | 0.25 - 0.35 | 1049 | 0.29 | 0.23 - 0.34 |
| <b>Cholesterol</b>                                          |             |      |             |     |      |              |     |      |             |     |              |             |      |      |             |      |      |             |
| Serum total cholesterol (mmol/L)                            | 547         | 0.28 | 0.20 - 0.36 | 505 | 0.24 | 0.16 - 0.32  | 586 | 0.31 | 0.24 - 0.38 | 544 | 0.33         | 0.26 - 0.41 | 1133 | 0.30 | 0.24 - 0.35 | 1049 | 0.29 | 0.24 - 0.35 |
| Total cholesterol in VLDL (mmol/L)                          | 547         | 0.26 | 0.18 - 0.34 | 505 | 0.27 | 0.19 - 0.35  | 586 | 0.26 | 0.18 - 0.33 | 544 | 0.26         | 0.18 - 0.34 | 1133 | 0.26 | 0.21 - 0.32 | 1049 | 0.27 | 0.21 - 0.32 |
| Remnant cholesterol (nonHDL, nonLDL cholesterol) (mmol/L)   | 547         | 0.27 | 0.19 - 0.34 | 505 | 0.26 | 0.18 - 0.34  | 586 | 0.28 | 0.20 - 0.35 | 544 | 0.29         | 0.21 - 0.37 | 1133 | 0.27 | 0.22 - 0.33 | 1049 | 0.28 | 0.22 - 0.34 |
| Total cholesterol in LDL (mmol/L)                           | 547         | 0.29 | 0.21 - 0.36 | 505 | 0.26 | 0.17 - 0.34  | 586 | 0.28 | 0.21 - 0.35 | 544 | 0.30         | 0.23 - 0.38 | 1133 | 0.29 | 0.23 - 0.34 | 1049 | 0.28 | 0.23 - 0.34 |
| Total cholesterol in HDL (mmol/L)                           | 547         | 0.27 | 0.19 - 0.35 | 505 | 0.25 | 0.17 - 0.33  | 586 | 0.22 | 0.14 - 0.29 | 544 | 0.20         | 0.12 - 0.28 | 1133 | 0.24 | 0.19 - 0.30 | 1049 | 0.22 | 0.17 - 0.28 |
| Total cholesterol in HDL2 (mmol/L)                          | 547         | 0.27 | 0.19 - 0.34 | 505 | 0.25 | 0.17 - 0.33  | 586 | 0.21 | 0.14 - 0.29 | 544 | 0.20         | 0.11 - 0.28 | 1133 | 0.24 | 0.18 - 0.29 | 1049 | 0.22 | 0.16 - 0.28 |
| Total cholesterol in HDL3 (mmol/L)                          | 547         | 0.25 | 0.17 - 0.33 | 505 | 0.22 | 0.14 - 0.30  | 586 | 0.23 | 0.15 - 0.31 | 544 | 0.23         | 0.14 - 0.30 | 1133 | 0.24 | 0.19 - 0.30 | 1049 | 0.22 | 0.16 - 0.28 |
| Esterified cholesterol (mmol/L)                             | 543         | 0.28 | 0.20 - 0.36 | 502 | 0.24 | 0.15 - 0.32  | 584 | 0.31 | 0.24 - 0.38 | 542 | 0.33         | 0.25 - 0.40 | 1127 | 0.30 | 0.24 - 0.35 | 1044 | 0.29 | 0.23 - 0.34 |
| Free cholesterol (mmol/L)                                   | 543         | 0.27 | 0.19 - 0.34 | 502 | 0.23 | 0.14 - 0.31  | 584 | 0.32 | 0.24 - 0.39 | 542 | 0.34         | 0.26 - 0.41 | 1127 | 0.29 | 0.24 - 0.35 | 1044 | 0.29 | 0.23 - 0.34 |
| <b>Glycerides and phospholipids</b>                         |             |      |             |     |      |              |     |      |             |     |              |             |      |      |             |      |      |             |
| Serum total triglycerides (mmol/L)*                         | 547         | 0.28 | 0.20 - 0.35 | 505 | 0.29 | 0.20 - 0.36  | 586 | 0.25 | 0.17 - 0.32 | 544 | 0.24         | 0.16 - 0.32 | 1133 | 0.26 | 0.21 - 0.32 | 1049 | 0.26 | 0.21 - 0.32 |
| Triglycerides in VLDL (mmol/L)*                             | 547         | 0.28 | 0.20 - 0.36 | 505 | 0.29 | 0.21 - 0.37  | 586 | 0.23 | 0.15 - 0.30 | 544 | 0.21         | 0.13 - 0.29 | 1133 | 0.26 | 0.20 - 0.31 | 1049 | 0.25 | 0.20 - 0.31 |
| Triglycerides in LDL (mmol/L)                               | 547         | 0.20 | 0.12 - 0.28 | 505 | 0.19 | 0.10 - 0.27  | 586 | 0.27 | 0.19 - 0.34 | 544 | 0.28         | 0.20 - 0.35 | 1133 | 0.24 | 0.18 - 0.29 | 1049 | 0.24 | 0.18 - 0.29 |
| Triglycerides in HDL (mmol/L)                               | 547         | 0.25 | 0.17 - 0.33 | 505 | 0.26 | 0.18 - 0.34  | 586 | 0.27 | 0.20 - 0.35 | 544 | 0.28         | 0.20 - 0.35 | 1133 | 0.26 | 0.21 - 0.32 | 1049 | 0.27 | 0.21 - 0.32 |
| Total phosphoglycerides (mmol/L)                            | 543         | 0.28 | 0.20 - 0.36 | 502 | 0.24 | 0.16 - 0.32  | 584 | 0.27 | 0.19 - 0.34 | 542 | 0.29         | 0.21 - 0.36 | 1127 | 0.27 | 0.22 - 0.33 | 1044 | 0.26 | 0.20 - 0.32 |
| Ratio of triglycerides to phosphoglycerides                 | 543         | 0.23 | 0.15 - 0.31 | 502 | 0.24 | 0.16 - 0.32  | 584 | 0.21 | 0.13 - 0.28 | 542 | 0.20         | 0.12 - 0.28 | 1127 | 0.22 | 0.16 - 0.27 | 1044 | 0.22 | 0.16 - 0.28 |
| Phosphatidylcholine & other cholines (mmol/L)               | 542         | 0.28 | 0.20 - 0.36 | 501 | 0.23 | 0.15 - 0.32  | 584 | 0.26 | 0.19 - 0.34 | 542 | 0.28         | 0.20 - 0.36 | 1126 | 0.27 | 0.21 - 0.32 | 1043 | 0.26 | 0.20 - 0.31 |
| Sphingomyelins (mmol/L)                                     | 542         | 0.23 | 0.15 - 0.31 | 501 | 0.20 | 0.12 - 0.29  | 584 | 0.28 | 0.21 - 0.36 | 542 | 0.30         | 0.22 - 0.37 | 1126 | 0.26 | 0.20 - 0.31 | 1043 | 0.26 | 0.20 - 0.31 |
| Total cholines (mmol/L)                                     | 542         | 0.27 | 0.19 - 0.35 | 501 | 0.23 | 0.14 - 0.31  | 584 | 0.29 | 0.21 - 0.36 | 542 | 0.30         | 0.22 - 0.37 | 1126 | 0.28 | 0.22 - 0.33 | 1043 | 0.26 | 0.20 - 0.32 |
| <b>Apolipoproteins</b>                                      |             |      |             |     |      |              |     |      |             |     |              |             |      |      |             |      |      |             |
| Apolipoprotein A1 (g/L)                                     | 547         | 0.26 | 0.18 - 0.34 | 505 | 0.23 | 0.14 - 0.31  | 586 | 0.25 | 0.17 - 0.33 | 544 | 0.25         | 0.17 - 0.32 | 1133 | 0.25 | 0.20 - 0.31 | 1049 | 0.23 | 0.18 - 0.29 |
| Apolipoprotein B (g/L)                                      | 547         | 0.27 | 0.19 - 0.35 | 505 | 0.27 | 0.19 - 0.35  | 585 | 0.28 | 0.20 - 0.35 | 543 | 0.30         | 0.22 - 0.37 | 1132 | 0.28 | 0.23 - 0.33 | 1048 | 0.29 | 0.23 - 0.34 |
| Ratio of apolipoprotein B to apolipoprotein AI              | 547         | 0.26 | 0.18 - 0.33 | 505 | 0.27 | 0.18 - 0.34  | 585 | 0.21 | 0.13 - 0.29 | 543 | 0.20         | 0.12 - 0.28 | 1132 | 0.23 | 0.18 - 0.29 | 1048 | 0.24 | 0.18 - 0.29 |
| <b>Fatty acids</b>                                          |             |      |             |     |      |              |     |      |             |     |              |             |      |      |             |      |      |             |
| Total fatty acids (mmol/L)                                  | 537         | 0.26 | 0.18 - 0.33 | 496 | 0.25 | 0.17 - 0.33  | 583 | 0.30 | 0.22 - 0.37 | 541 | 0.31         | 0.23 - 0.39 | 1120 | 0.28 | 0.23 - 0.33 | 1037 | 0.29 | 0.23 - 0.34 |
| Estimated degree of unsaturation                            | 537         | 0.30 | 0.22 - 0.37 | 496 | 0.32 | 0.23 - 0.39  | 583 | 0.24 | 0.17 - 0.32 | 541 | 0.22         | 0.14 - 0.30 | 1120 | 0.27 | 0.21 - 0.32 | 1037 | 0.26 | 0.20 - 0.32 |
| 22:6, docosahexaenoic acid (mmol/L)                         | 537         | 0.23 | 0.15 - 0.31 | 496 | 0.21 | 0.13 - 0.30  | 583 | 0.33 | 0.26 - 0.40 | 541 | 0.33         | 0.25 - 0.40 | 1120 | 0.28 | 0.23 - 0.34 | 1037 | 0.27 | 0.21 - 0.32 |
| 18:2, linoleic acid (mmol/L)                                | 537         | 0.24 | 0.16 - 0.32 | 496 | 0.25 | 0.16 - 0.33  | 583 | 0.27 | 0.19 - 0.34 | 541 | 0.29         | 0.21 - 0.37 | 1120 | 0.26 | 0.21 - 0.32 | 1037 | 0.28 | 0.22 - 0.33 |
| Omega3 fatty acids (mmol/L)                                 | 537         | 0.24 | 0.16 - 0.32 | 496 | 0.22 | 0.14 - 0.31  | 583 | 0.34 | 0.27 - 0.41 | 541 | 0.34         | 0.27 - 0.41 | 1120 | 0.29 | 0.23 - 0.34 | 1037 | 0.28 | 0.22 - 0.33 |
| Omega6 fatty acids (mmol/L)                                 | 537         | 0.26 | 0.18 - 0.33 | 496 | 0.25 | 0.16 - 0.33  | 583 | 0.30 | 0.23 - 0.38 | 541 | 0.33         | 0.25 - 0.40 | 1120 | 0.28 | 0.23 - 0.34 | 1037 | 0.29 | 0.24 - 0.35 |
| Polysat. fatty acids (mmol/L)                               | 537         | 0.26 | 0.17 - 0.33 | 496 | 0.24 | 0.16 - 0.33  | 583 | 0.31 | 0.24 - 0.39 | 541 | 0.34         | 0.26 - 0.41 | 1120 | 0.29 | 0.23 - 0.34 | 1037 | 0.29 | 0.24 - 0.35 |
| Monounsat. fatty acids; 16:1, 18:1 (mmol/L)                 | 537         | 0.27 | 0.19 - 0.35 | 496 | 0.28 | 0.19 - 0.36  | 583 | 0.30 | 0.22 - 0.37 | 541 | 0.30         | 0.23 - 0.38 | 1120 | 0.29 | 0.24 - 0.34 | 1037 | 0.29 | 0.24 - 0.35 |
| Saturated fatty acids (mmol/L)                              | 537         | 0.25 | 0.17 - 0.33 | 496 | 0.25 | 0.16 - 0.33  | 583 | 0.28 | 0.20 - 0.35 | 541 | 0.28         | 0.20 - 0.36 | 1120 | 0.27 | 0.21 - 0.32 | 1037 | 0.27 | 0.21 - 0.32 |
| <b>Fatty acid ratios</b>                                    |             |      |             |     |      |              |     |      |             |     |              |             |      |      |             |      |      |             |
| Ratio of 22:6 docosahexaenoic acid to total fatty acids (%) | 537         | 0.31 | 0.23 - 0.38 | 496 | 0.30 | 0.21 - 0.37  | 583 | 0.33 | 0.26 - 0.40 | 541 | 0.31         | 0.23 - 0.38 | 1120 | 0.32 | 0.27 - 0.37 | 1037 | 0.30 | 0.24 - 0.36 |
| Ratio of 18:2 linoleic acid to total fatty acids (%)        | 537         | 0.15 | 0.07 - 0.23 | 496 | 0.17 | 0.08 - 0.25  | 583 | 0.18 | 0.10 - 0.26 | 541 | 0.16         | 0.08 - 0.24 | 1120 | 0.17 | 0.11 - 0.23 | 1037 | 0.16 | 0.10 - 0.22 |
| Ratio of omega3 fatty acids to total fatty acids (%)        | 537         | 0.32 | 0.24 - 0.39 | 496 | 0.32 | 0.23 - 0.39  | 583 | 0.40 | 0.33 - 0.47 | 541 | 0.38         | 0.31 - 0.45 | 1120 | 0.36 | 0.31 - 0.41 | 1037 | 0.35 | 0.29 - 0.40 |
| Ratio of omega6 fatty acids to total fatty acids (%)        | 537         | 0.24 | 0.16 -      |     |      |              |     |      |             |     |              |             |      |      |             |      |      |             |



1  
2  
3  
4  
5  
6  
7  
8  
9  
10  
11  
12  
13  
14  
15  
16  
17  
18  
19  
20  
21  
22  
23  
24  
25  
26  
27  
28  
29  
30  
31  
32  
33  
34  
35  
36  
37  
38  
39  
40  
41  
42  
43  
44  
45  
46  
47  
48  
49  
50  
51  
52  
53  
54  
55  
56  
57  
58  
59  
60

Supplementary Figure 1: Correlations between Child Health CheckPoint metabolites - children

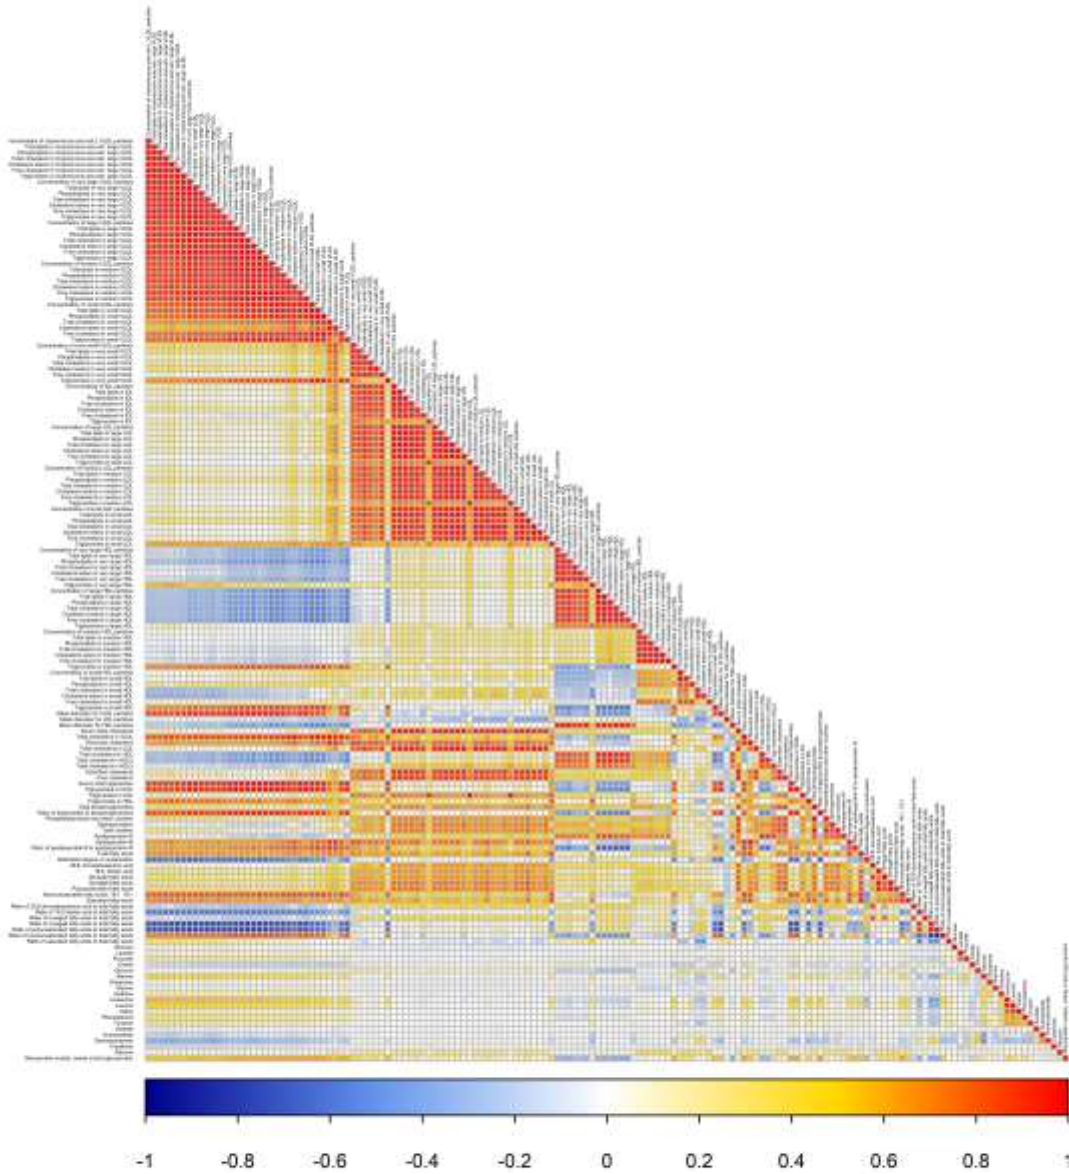

Note: Correlations (spearman) between metabolites for the CheckPoint child metabolomics data

Supplementary Figure 2: Correlations between Child Health CheckPoint metabolites - parents

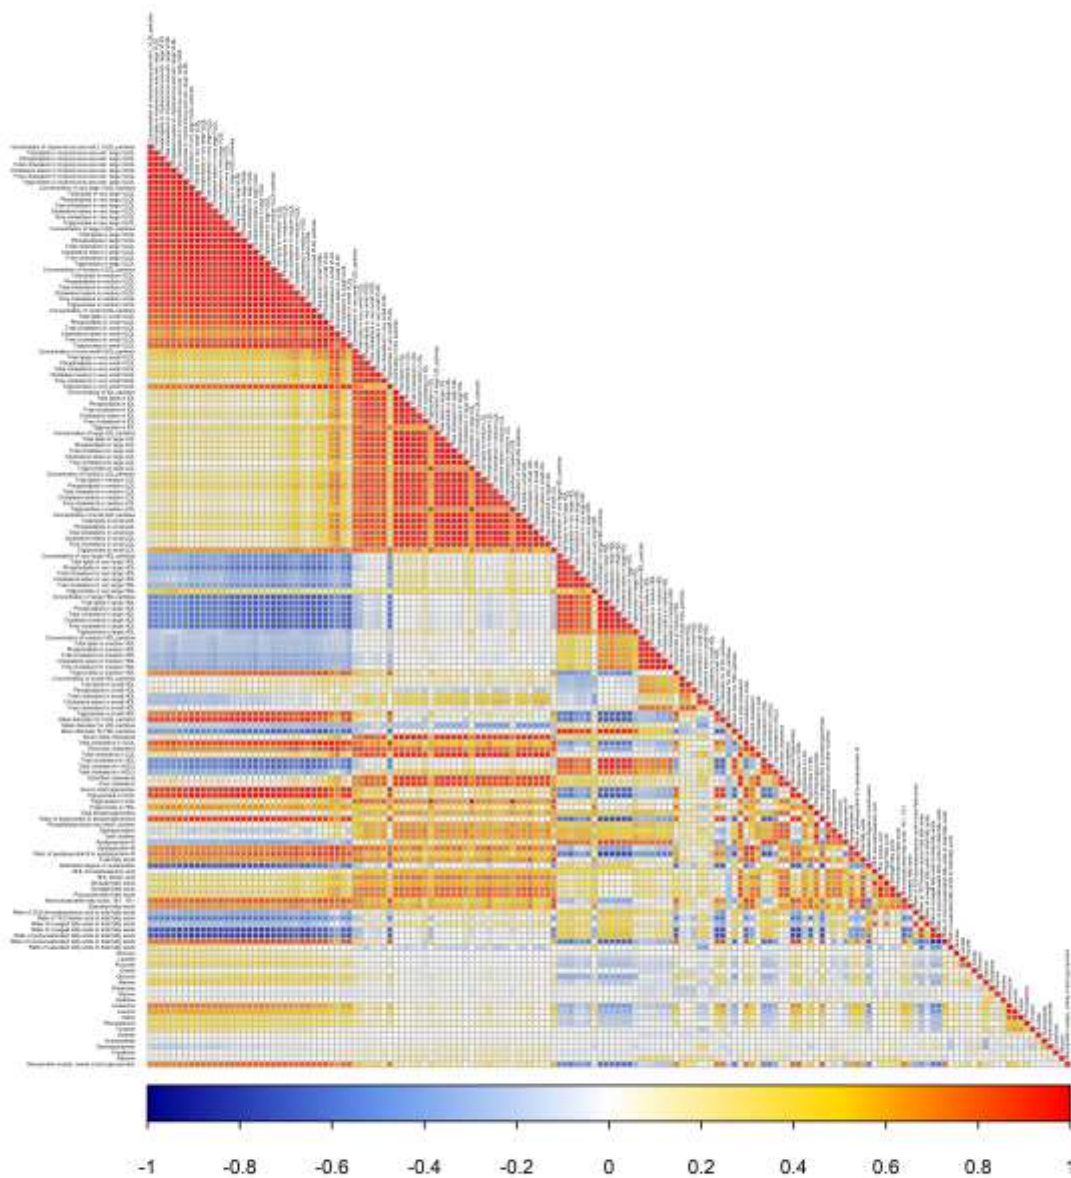

Note: Correlations (spearman) between metabolites for the CheckPoint parent metabolomics data

Supplementary Figure 3

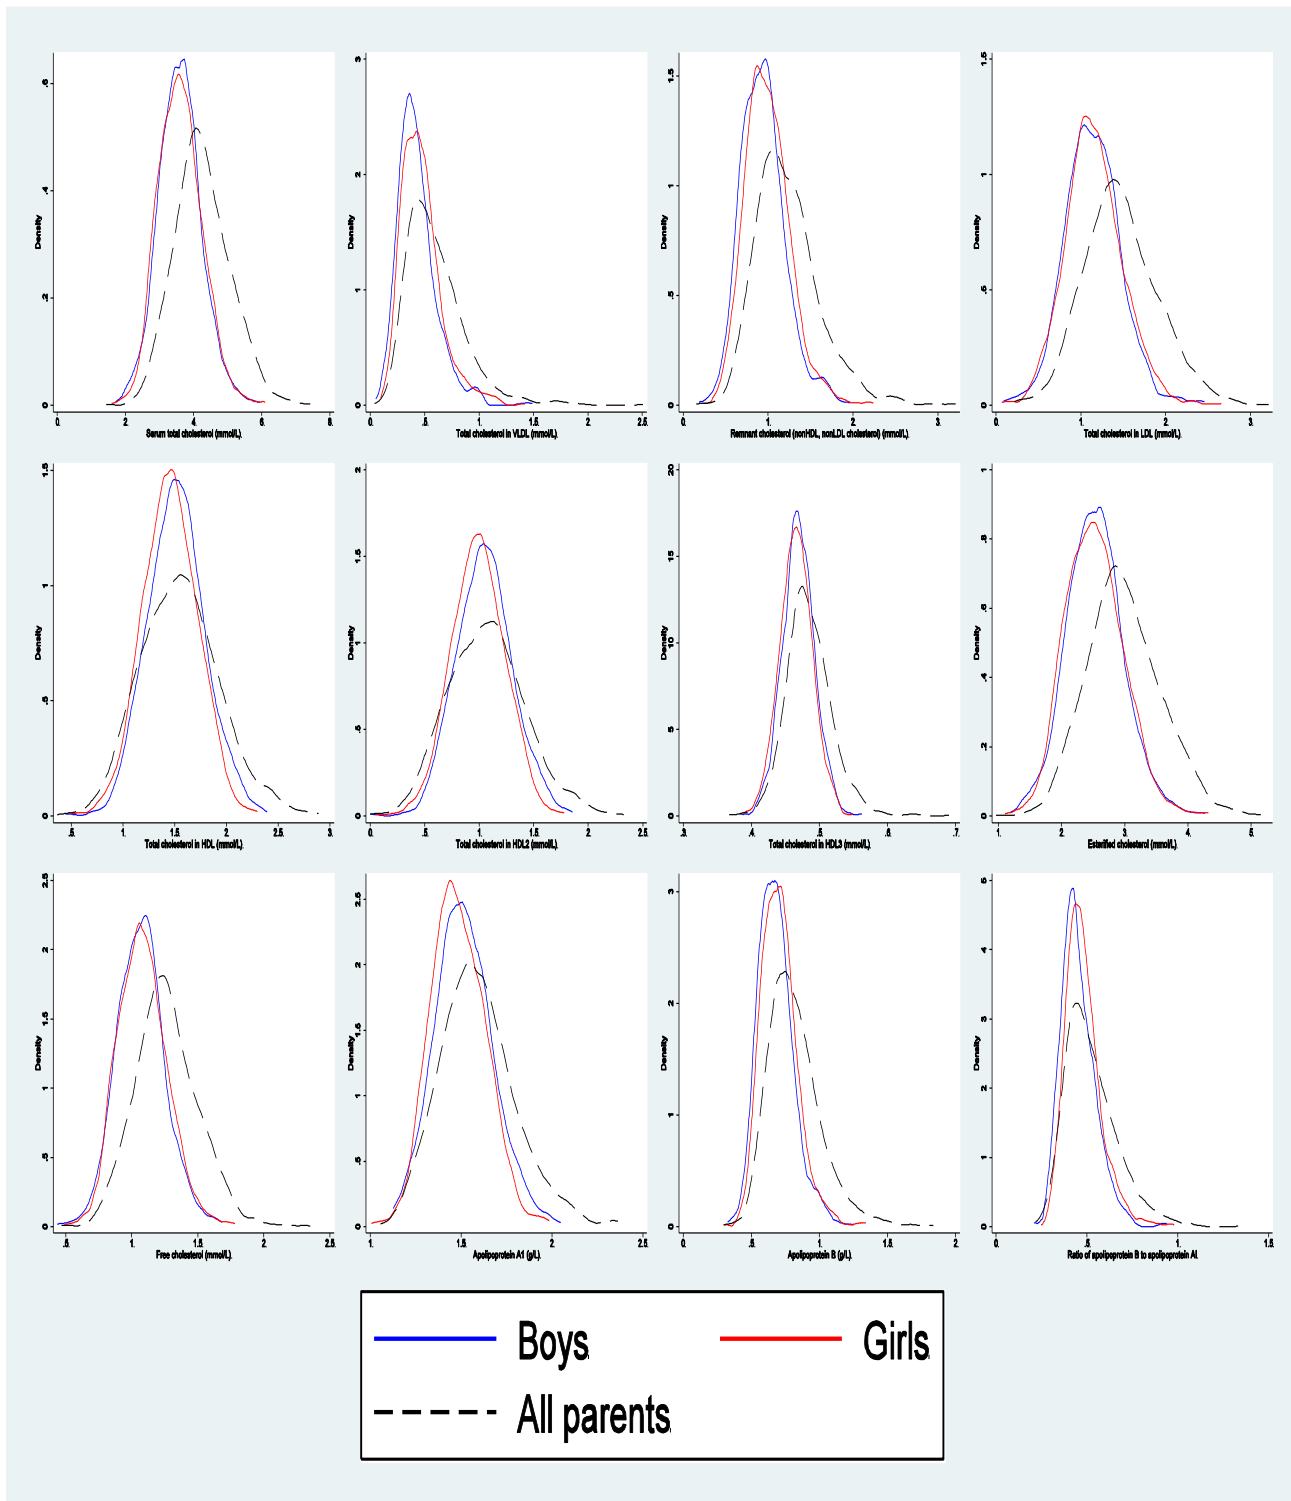

Supplementary Figure 4

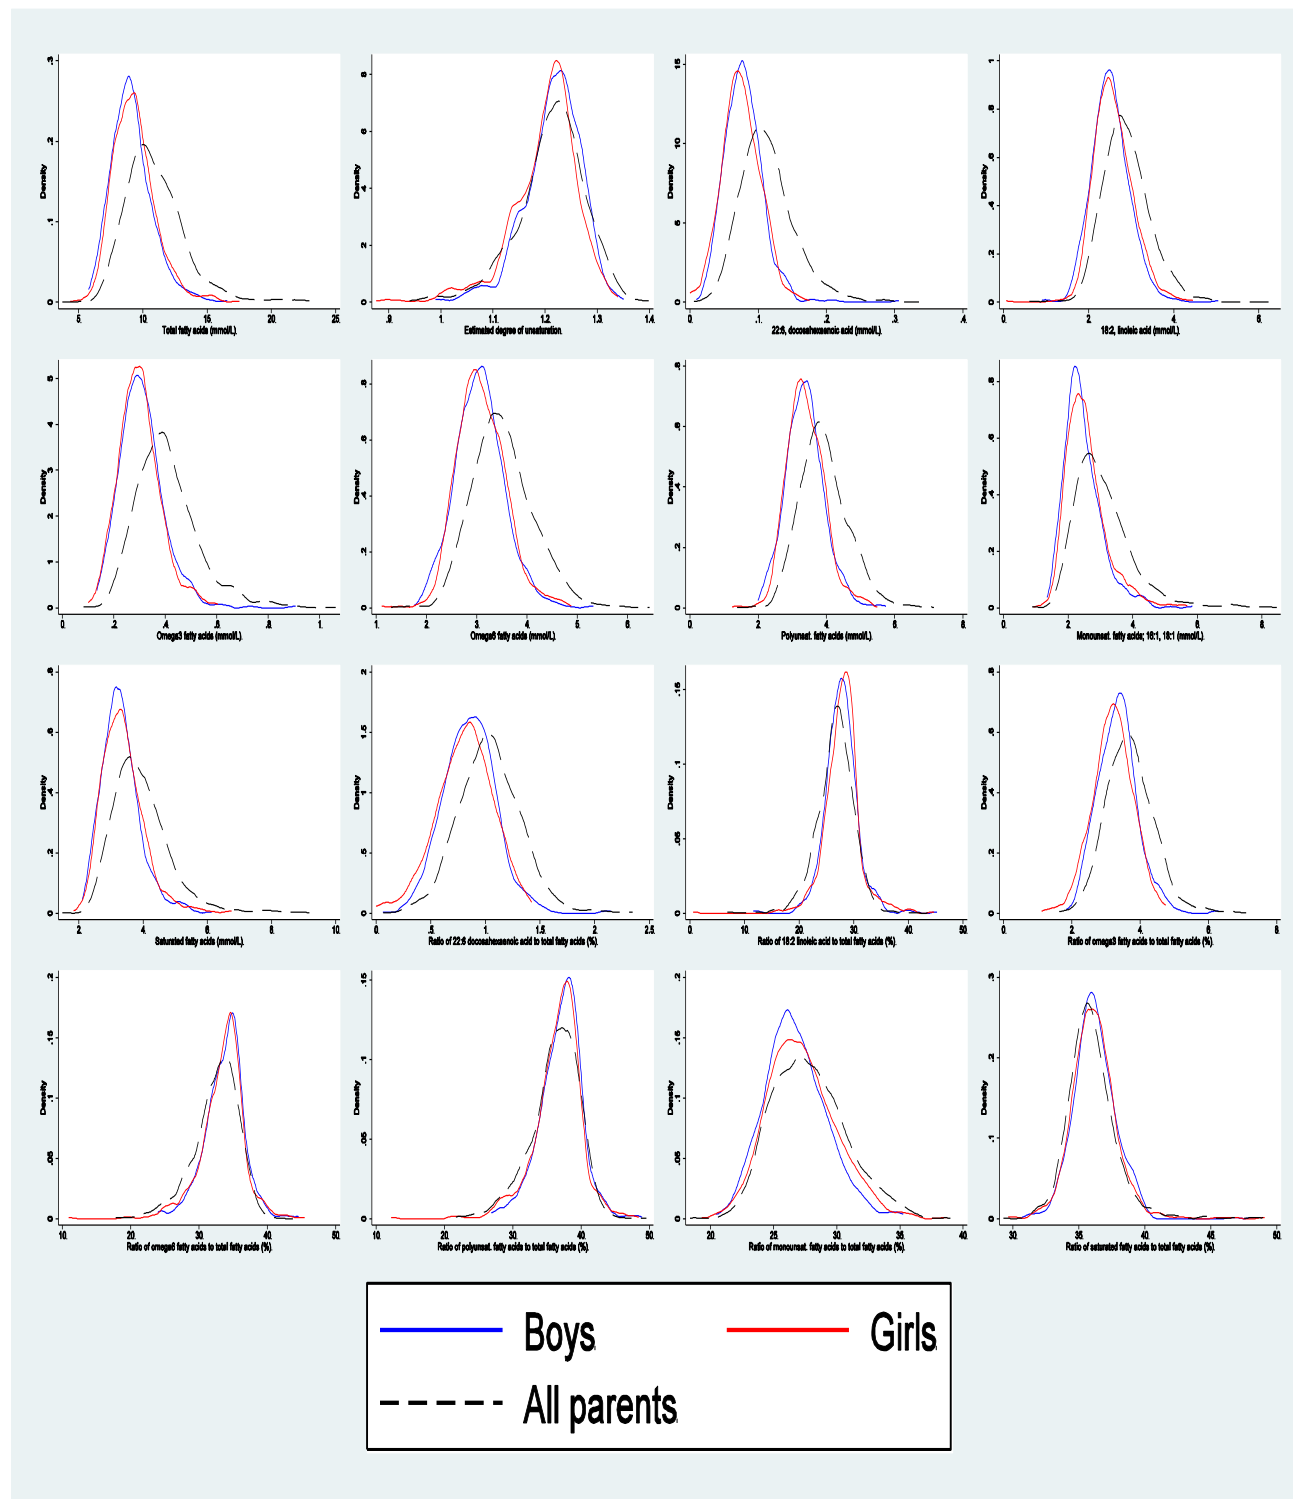

Supplementary Figure 5

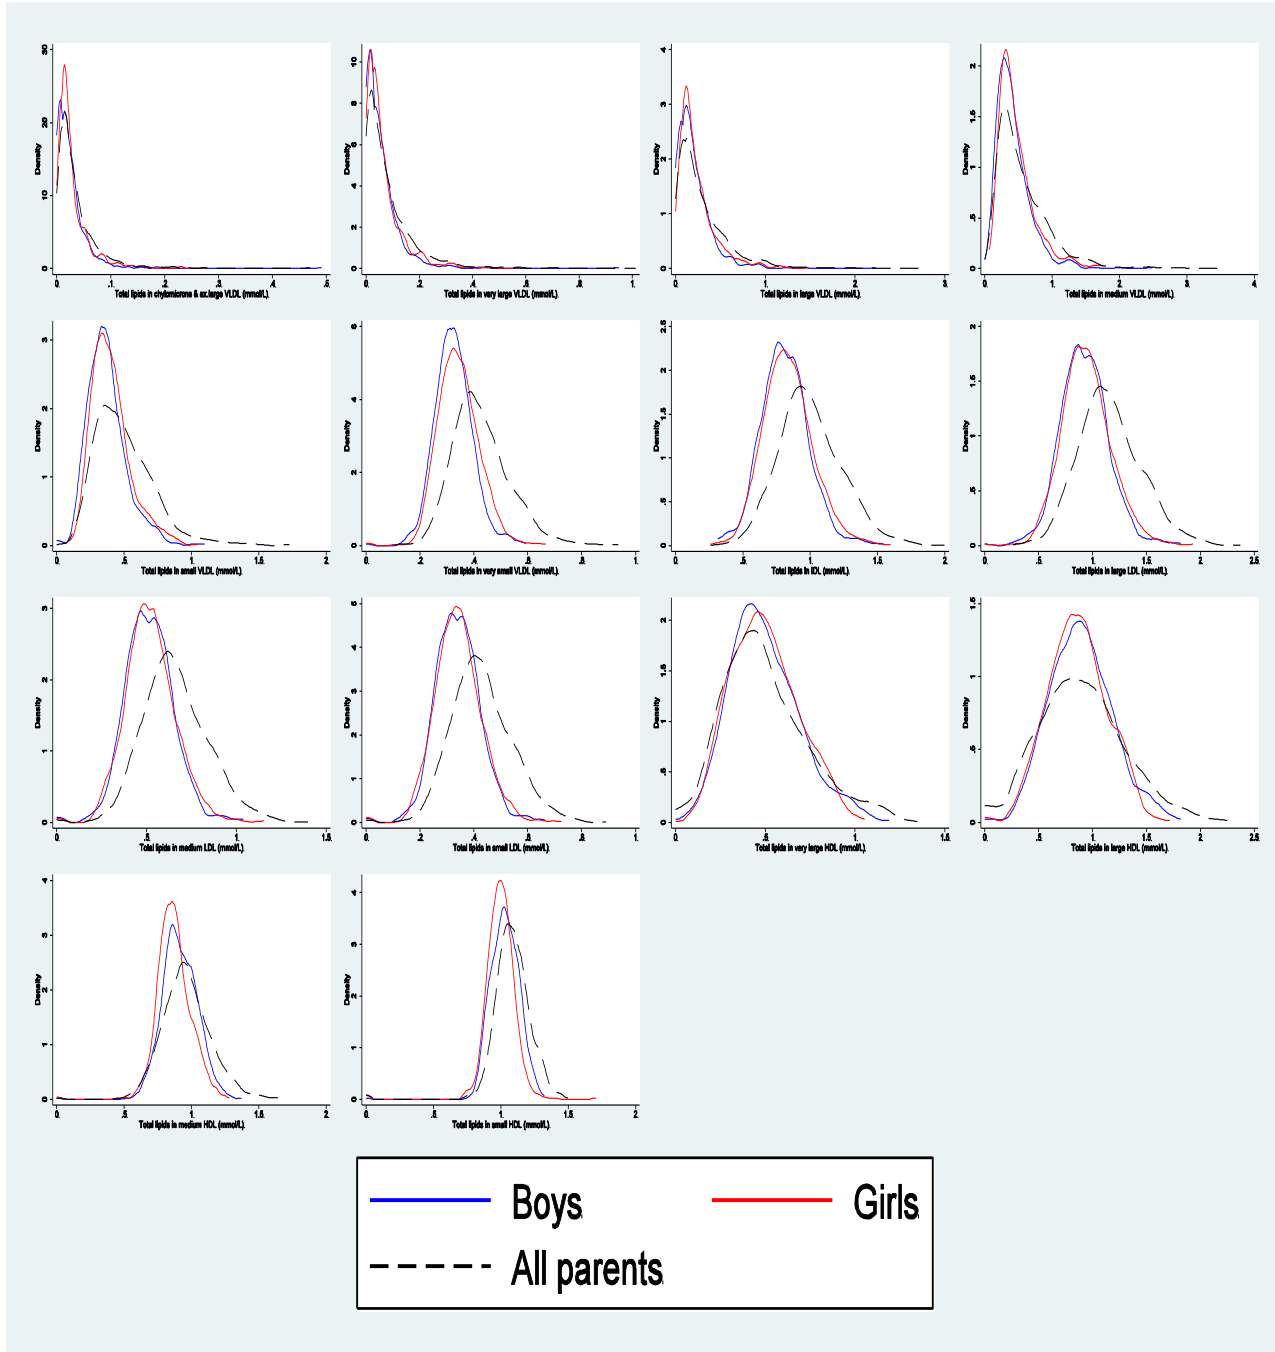

Supplementary Figure 6

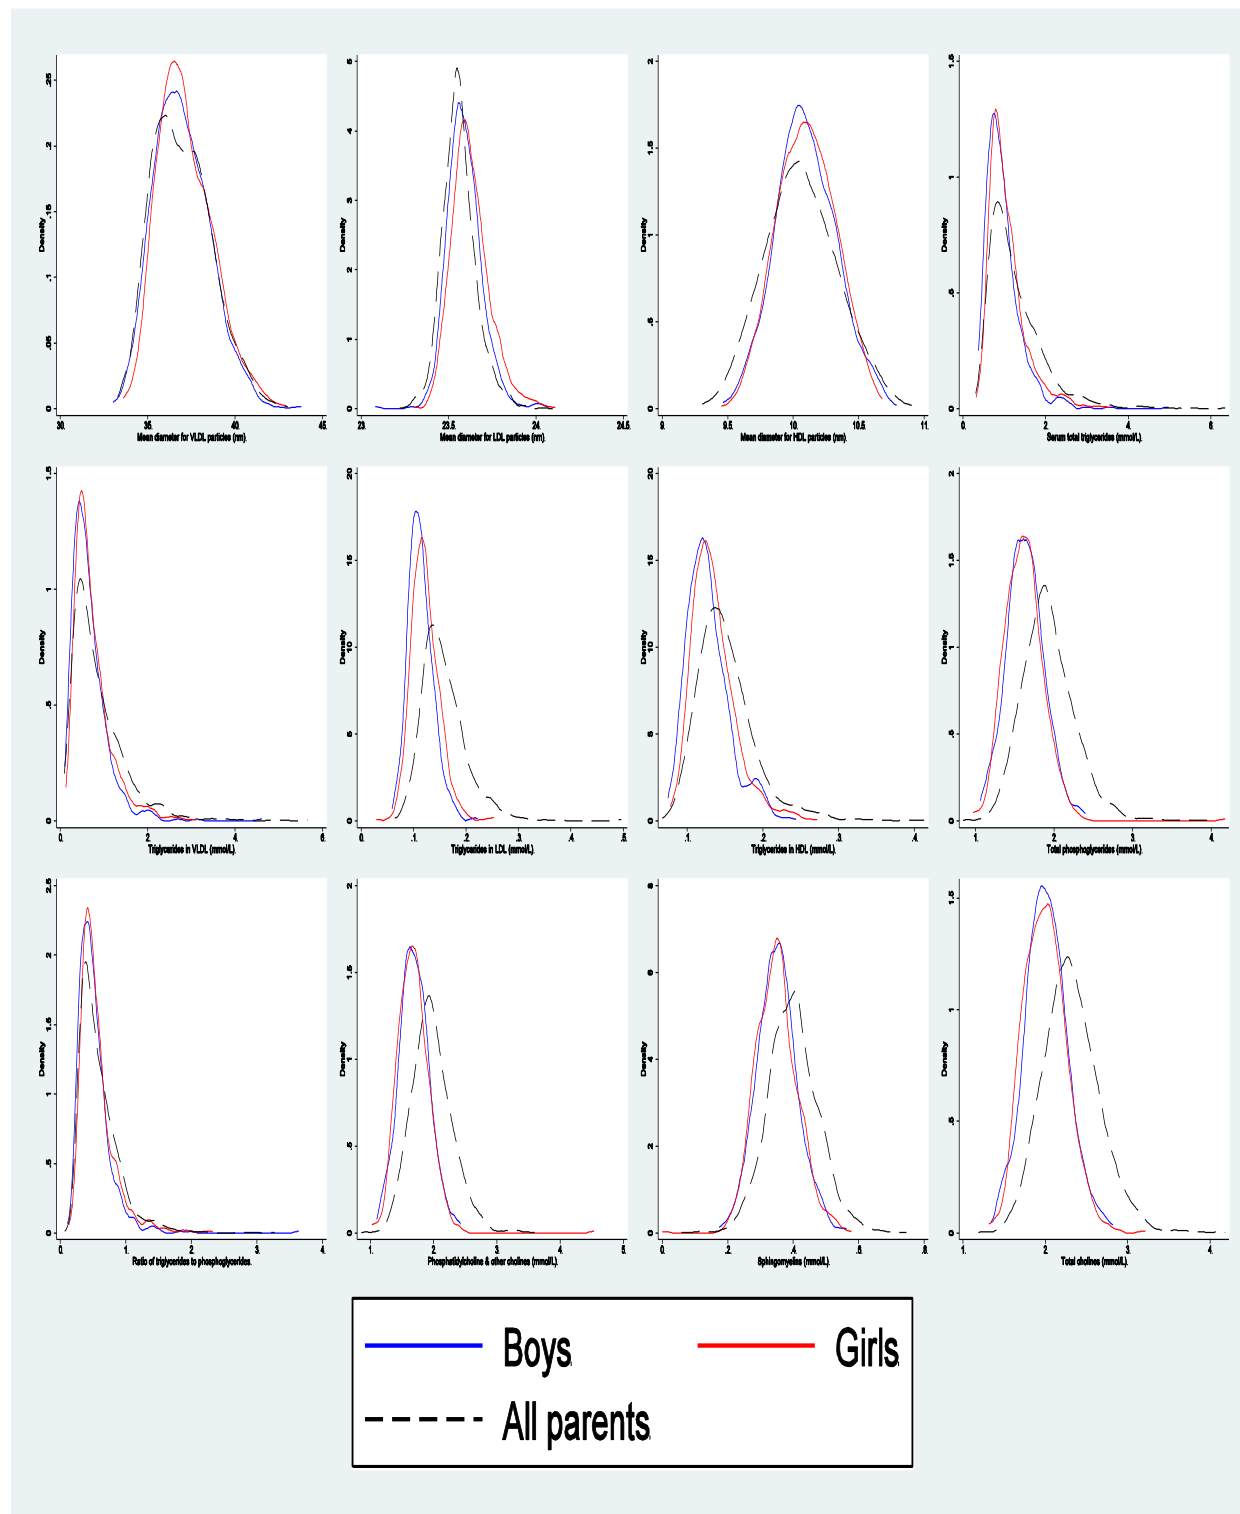



Supplementary Figure 7

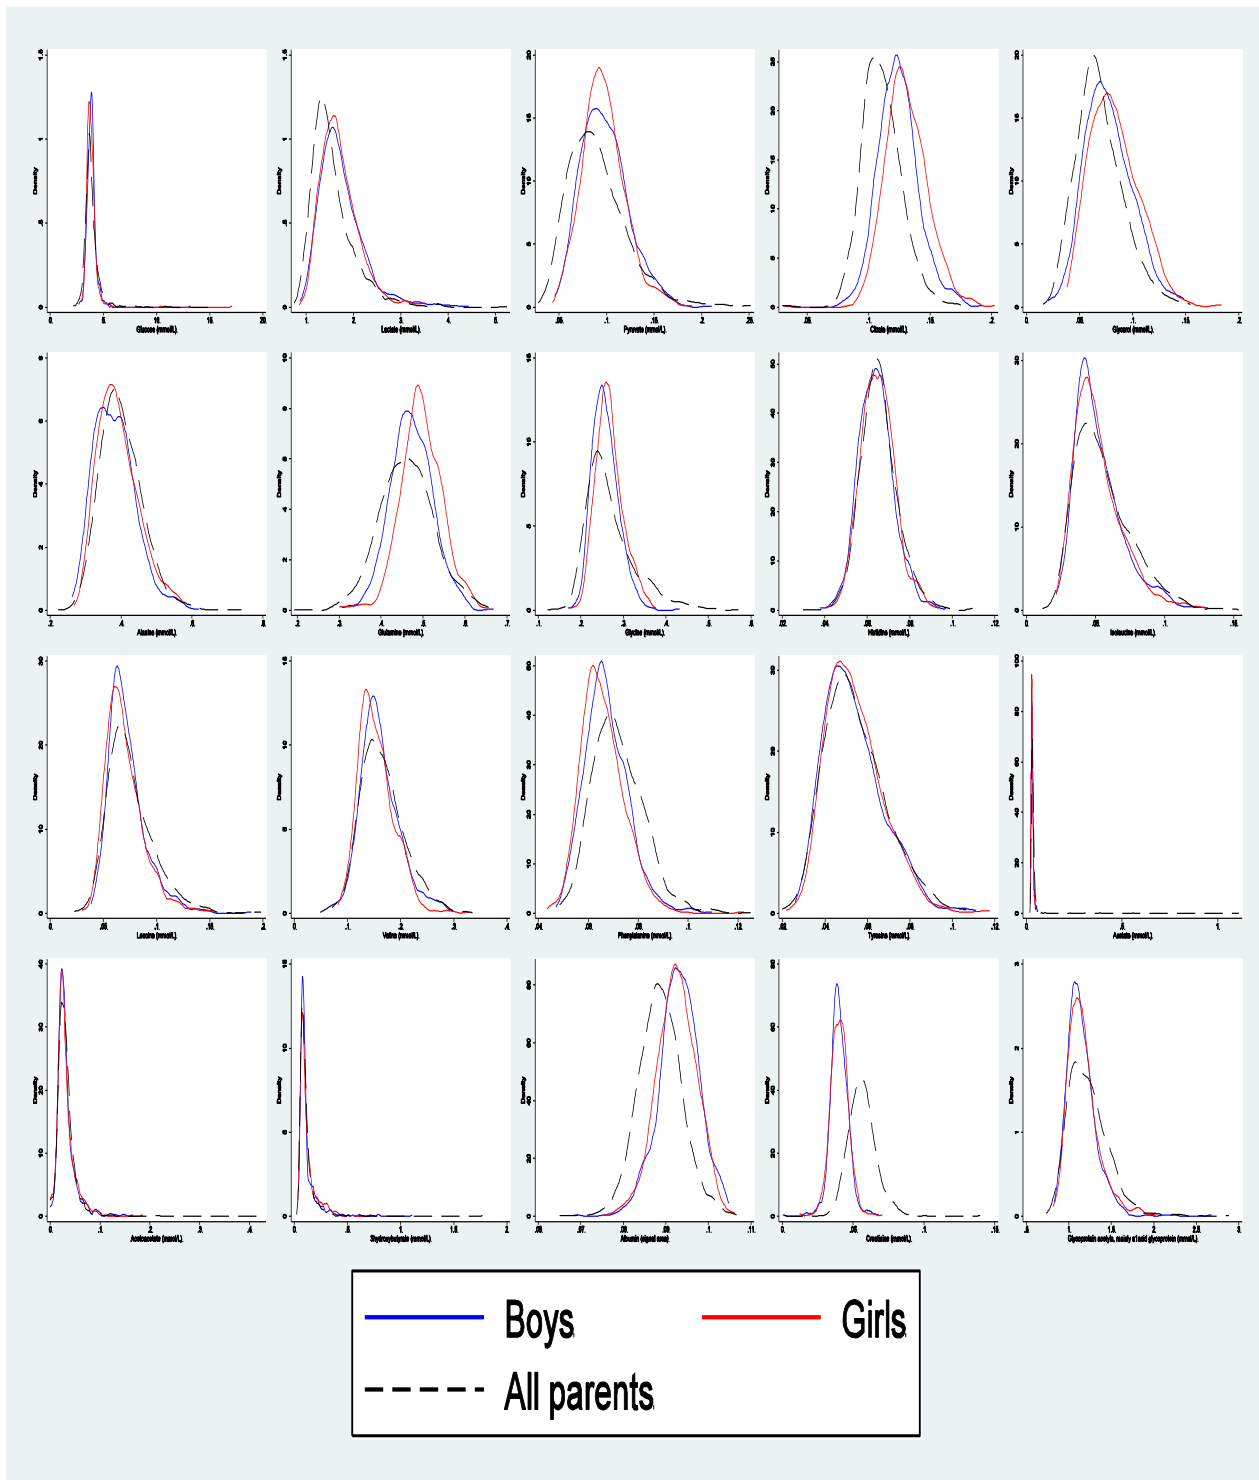

## STROBE Statement—checklist of items that should be included in reports of observational studies

**Paper title:** Metabolomics: Population epidemiology and concordance in 11-12 year old

Australians and their parents

**Person completing checklist:** Susan Ellul

|                              | Item No | Recommendation                                                                                                                                                                                                                                                                                                                                                                                                                                                                       | Page number | Line number                                         |
|------------------------------|---------|--------------------------------------------------------------------------------------------------------------------------------------------------------------------------------------------------------------------------------------------------------------------------------------------------------------------------------------------------------------------------------------------------------------------------------------------------------------------------------------|-------------|-----------------------------------------------------|
| <b>Title and abstract</b>    | 1       | (a) Indicate the study's design with a commonly used term in the title or the abstract                                                                                                                                                                                                                                                                                                                                                                                               | 2           | 14-15                                               |
|                              |         | (b) Provide in the abstract an informative and balanced summary of what was done and what was found                                                                                                                                                                                                                                                                                                                                                                                  | 2           | 9-13<br>25-32                                       |
| <b>Introduction</b>          |         |                                                                                                                                                                                                                                                                                                                                                                                                                                                                                      |             |                                                     |
| Background/rationale         | 2       | Explain the scientific background and rationale for the investigation being reported                                                                                                                                                                                                                                                                                                                                                                                                 | 4-5         | Pg 4 (3-9 ,21-22,<br>31-32, 33-35)<br>Pg 5 (5-7)    |
| Objectives                   | 3       | State specific objectives, including any prespecified hypotheses                                                                                                                                                                                                                                                                                                                                                                                                                     | 5           | 8-11                                                |
| <b>Methods</b>               |         |                                                                                                                                                                                                                                                                                                                                                                                                                                                                                      |             |                                                     |
| Study design                 | 4       | Present key elements of study design early in the paper                                                                                                                                                                                                                                                                                                                                                                                                                              | 5           | 14-22                                               |
| Setting                      | 5       | Describe the setting, locations, and relevant dates, including periods of recruitment, exposure, follow-up, and data collection                                                                                                                                                                                                                                                                                                                                                      | 5-6         | Pg 5 (17-20)<br>Pg 6 (3-32)                         |
| Participants                 | 6       | (a) <i>Cohort study</i> —Give the eligibility criteria, and the sources and methods of selection of participants. Describe methods of follow-up<br><del>(b) <i>Case control study</i>—Give the eligibility criteria, and the sources and methods of case ascertainment and control selection. Give the rationale for the choice of cases and controls</del><br><i>Cross-sectional study</i> —Give the eligibility criteria, and the sources and methods of selection of participants | 5           | 23-31                                               |
|                              |         | (b) <i>Cohort study</i> —For matched studies, give matching criteria and number of exposed and unexposed<br><del><i>Case control study</i>—For matched studies, give matching criteria and the number of controls per case</del>                                                                                                                                                                                                                                                     |             |                                                     |
| Variables                    | 7       | Clearly define all outcomes, exposures, predictors, potential confounders, and effect modifiers. Give diagnostic criteria, if applicable                                                                                                                                                                                                                                                                                                                                             | 7-9         | Pg 7 (4-17)<br>Pg 8 ( table 1, 9-16)<br>Pg 9 (1-24) |
| Data sources/<br>measurement | 8*      | For each variable of interest, give sources of data and details of methods of assessment (measurement). Describe comparability of assessment methods if there is more than one group                                                                                                                                                                                                                                                                                                 | 7-9         | Pg 7 (4-17)<br>Pg 8 ( table 1, 9-16)<br>Pg 9 (1-24) |
| Bias                         | 9       | Describe any efforts to address potential sources of bias                                                                                                                                                                                                                                                                                                                                                                                                                            | 9 -10       | Pg 9 (31-35)<br>Pg 10 (16-18)                       |

|                        |    |                                                                                                                              |       |                               |
|------------------------|----|------------------------------------------------------------------------------------------------------------------------------|-------|-------------------------------|
| Study size             | 10 | Explain how the study size was arrived at                                                                                    | 11    | 5-14, figure 1                |
| Quantitative variables | 11 | Explain how quantitative variables were handled in the analyses. If applicable, describe which groupings were chosen and why | 9-10  | Pg 9 (28-35)<br>Pg 10 (3-15)  |
| Statistical methods    | 12 | (a) Describe all statistical methods, including those used to control for confounding                                        | 9-10  | Pg 9 (28-35)<br>Pg 10 (3-15)  |
|                        |    | (b) Describe any methods used to examine subgroups and interactions                                                          | 9-10  | Pg 9 (28-35)<br>Pg 10 (3-15)  |
|                        |    | (c) Explain how missing data were addressed                                                                                  | 9 -10 | Pg 9 (31-35)<br>Pg 10 (16-18) |
|                        |    | (d) <i>Cohort study</i> —If applicable, explain how loss to follow-up was addressed                                          | 9     | 31-35                         |
|                        |    | <del>(e) <i>Case-control study</i>—If applicable, explain how matching of cases and controls was addressed</del>             |       |                               |
|                        |    | (e) Describe any sensitivity analyses                                                                                        | 10    | 16-18                         |

| <b>Results</b>   |     |                                                                                                                                                                                                              | <b>Page number</b>                 | <b>Line number</b> |
|------------------|-----|--------------------------------------------------------------------------------------------------------------------------------------------------------------------------------------------------------------|------------------------------------|--------------------|
| Participants     | 13* | (a) Report numbers of individuals at each stage of study—eg numbers potentially eligible, examined for eligibility, confirmed eligible, included in the study, completing follow-up, and analysed            | 11 and figure 1                    | 5-12               |
|                  |     | (b) Give reasons for non-participation at each stage                                                                                                                                                         | 11<br>6<br>figure 1                | 8-12<br>7-11       |
|                  |     | (c) Consider use of a flow diagram                                                                                                                                                                           | figure 1                           |                    |
| Descriptive data | 14* | (a) Give characteristics of study participants (eg demographic, clinical, social) and information on exposures and potential confounders                                                                     | 12<br>(table 2)                    | 2                  |
|                  |     | (b) Indicate number of participants with missing data for each variable of interest                                                                                                                          | figure 1<br>table 2<br>sup Table 1 | 2                  |
|                  |     | (c) <i>Cohort study</i> —Summarise follow-up time (eg, average and total amount)                                                                                                                             | NA                                 |                    |
| Outcome data     | 15* | <i>Cohort study</i> —Report numbers of outcome events or summary measures over time                                                                                                                          | sup table 1                        |                    |
|                  |     | <i>Case-control study</i> —Report numbers in each exposure category, or summary measures of exposure                                                                                                         | NA                                 |                    |
|                  |     | <i>Cross-sectional study</i> —Report numbers of outcome events or summary measures                                                                                                                           | NA                                 |                    |
| Main results     | 16  | (a) Give unadjusted estimates and, if applicable, confounder-adjusted estimates and their precision (eg, 95% confidence interval). Make clear which confounders were adjusted for and why they were included | 13<br>supp tables<br>2-6           | 21-24              |
|                  |     | (b) Report category boundaries when continuous variables were categorized                                                                                                                                    | NA                                 |                    |

|                          |    |                                                                                                                                                                            |                    |                                                            |
|--------------------------|----|----------------------------------------------------------------------------------------------------------------------------------------------------------------------------|--------------------|------------------------------------------------------------|
|                          |    | (c) If relevant, consider translating estimates of relative risk into absolute risk for a meaningful time period                                                           | NA                 |                                                            |
| Other analyses           | 17 | Report other analyses done—eg analyses of subgroups and interactions, and sensitivity analyses                                                                             | supp tables<br>2-6 |                                                            |
| <b>Discussion</b>        |    |                                                                                                                                                                            |                    |                                                            |
| Key results              | 18 | Summarise key results with reference to study objectives                                                                                                                   | 14                 | 3-10                                                       |
| Limitations              | 19 | Discuss limitations of the study, taking into account sources of potential bias or imprecision. Discuss both direction and magnitude of any potential bias                 | 14                 | 18-28                                                      |
| Interpretation           | 20 | Give a cautious overall interpretation of results considering objectives, limitations, multiplicity of analyses, results from similar studies, and other relevant evidence | 14-17              | Pg 14 (30-32)<br>Pg 15 (all)<br>Pg 16 (all)<br>Pg 17 (1-2) |
| Generalisability         | 21 | Discuss the generalisability (external validity) of the study results                                                                                                      | 14                 | 18-28                                                      |
| <b>Other information</b> |    |                                                                                                                                                                            |                    |                                                            |
| Funding                  | 22 | Give the source of funding and the role of the funders for the present study and, if applicable, for the original study on which the present article is based              | 18-19              | Pg 18 (21-33)<br>Pg 19 (1-2)                               |

\*Give information separately for cases and controls in case-control studies and, if applicable, for exposed and unexposed groups in cohort and cross-sectional studies.

**Note:** An Explanation and Elaboration article discusses each checklist item and gives methodological background and published examples of transparent reporting. The STROBE checklist is best used in conjunction with this article (freely available on the Web sites of PLoS Medicine at <http://www.plosmedicine.org/>, Annals of Internal Medicine at <http://www.annals.org/>, and Epidemiology at <http://www.epidem.com/>). Information on the STROBE Initiative is available at [www.strobe-statement.org](http://www.strobe-statement.org).
